# Supplementary material for: The Sink-Source Relationship in Cucumber (Cucumis sativus L.) Is Modulated by DNA Methylation
Source: Plants (Basel). 2023 Dec 28;13(1):103. doi: 10.3390/plants13010103 (PMC10780960; doi:10.3390/plants13010103)
Supplement: Supplementary file 1 [file plants-13-00103-s001.zip › Supplemental Table.xlsx]

## Sheet: Table S1
Table S1 Annotation information of differentially methylated regions in CG, CHG and CHH site between FNLs and NFNLs.
Table S1a CG-FNLs_vs_NFNLs_DMR_Annotation
chr	start	end	strand	q-value	methyl-diff	CpGs	FNL	NFNL	cds	downstream 2kb	exon	gene body	intergenic	upstream 2kb
chr3	1532074	1532254	-	0.011167	-0.404381	7	0.47138	0.87576	--	--	--	--	CsaV3_3G001980|+	--
chr2	7361778	7361831	+	0.0069454	-0.235333	5	0.15927	0.3946	--	--	--	--	CsaV3_2G010360|+	--
chr6	12728759	12728834	-	0.0057726	-0.2064	5	0.34407	0.55047	--	--	--	CsaV3_6G017100|	--	CsaV3_6G017110|
chr7	13242694	13243174	+	3.12e-09	-0.201967	20	0.088117	0.29008	--	CsaV3_7G024240|	--	--	CsaV3_7G024250|-	--
scaffold18_1	205600	205853	+	1.17e-06	-0.197095	14	0.24036	0.43745	--	--	--	--	CsaV3_UNG201520|+	CsaV3_UNG201520|
chr6	9929486	9929615	+	0.042049	-0.195844	15	0.61036	0.8062	--	CsaV3_6G013730|	--	--	CsaV3_6G013740|+	--
chr7	11701093	11701578	-	0.0057726	-0.186511	15	0.042378	0.22889	--	--	--	--	CsaV3_7G022810|+	--
scaffold18_1	206036	206106	+	0.024914	-0.183267	5	0.12827	0.31153	--	--	--	--	CsaV3_UNG201520|+	CsaV3_UNG201520|
chr5	13645405	13645638	+	0.0014579	-0.177768	23	0.68651	0.86428	--	--	--	--	CsaV3_5G017090|-	--
scaffold18_1	868815	868905	-	0.0010341	-0.170167	6	0.023111	0.19328	--	--	--	--	CsaV3_UNG209080|-	--
scaffold134	56792	56862	+	0.00072584	-0.1655	18	0.58663	0.75213	--	--	--	--	CsaV3_UNG240590|-	--
scaffold18_1	205361	205683	-	1.08e-05	-0.154042	16	0.20394	0.35798	--	--	--	--	CsaV3_UNG201520|+	CsaV3_UNG201520|
chr7	16211634	16211776	+	0.020544	-0.14775	12	0.5845	0.73225	--	--	--	--	CsaV3_7G026670|-	--
scaffold18_1	669194	669659	-	6.27e-05	-0.147385	26	0.60955	0.75694	--	CsaV3_UNG208470|	CsaV3_UNG208460.1.exon1	CsaV3_UNG208460|	--	CsaV3_UNG208480|
chr4	10346413	10346675	-	0.045881	-0.143212	11	0.82355	0.96676	--	CsaV3_4G014850|	--	--	CsaV3_4G014860|+	--
scaffold18_1	208837	208946	+	0.018519	-0.136222	6	0.13417	0.27039	--	--	--	--	CsaV3_UNG201530|+	--
scaffold110	54219	54775	-	0.0045308	-0.12904	25	0.30557	0.43461	--	CsaV3_UNG224710|	--	--	CsaV3_UNG224710|-	--
scaffold110	45571	45877	-	0.031331	-0.126606	11	0.20458	0.33118	--	CsaV3_UNG224690|	--	--	CsaV3_UNG224700|-	--
scaffold18_1	173950	174211	+	0.00031989	-0.124167	10	0.74847	0.87263	--	--	--	--	CsaV3_UNG194490|+	CsaV3_UNG194490|,CsaV3_UNG192490|
scaffold110	47493	48309	+	2.07e-07	-0.12051	49	0.24792	0.36843	--	--	--	--	CsaV3_UNG224700|-	--
scaffold18_1	676737	676840	+	0.020544	-0.116967	10	0.68607	0.80303	CsaV3_UNG208540.1.cds2	CsaV3_UNG208520|,CsaV3_UNG208530|	CsaV3_UNG208540.1.exon2	CsaV3_UNG208540|	--	--
scaffold18_1	306805	307073	+	1.49e-07	-0.116511	15	0.082844	0.19936	--	CsaV3_UNG203670|	--	--	CsaV3_UNG203670|-	--
scaffold110	53386	54009	+	0.012919	-0.112683	20	0.18032	0.293	--	--	--	--	CsaV3_UNG224710|-	CsaV3_UNG224700|
scaffold110	46804	47348	-	0.011167	-0.105367	30	0.2257	0.33107	--	CsaV3_UNG224690|	--	--	CsaV3_UNG224700|-	--
chr4	331197	331270	-	3.89e-08	-0.100911	15	0.88053	0.98144	CsaV3_4G000600.1.cds1	--	CsaV3_4G000600.1.exon1	CsaV3_4G000600|	--	--
chr1	15160408	15160538	+	0.038081	-0.1006	15	0.79833	0.89893	--	--	--	--	CsaV3_1G028090|-	--
chr4	16053654	16053768	-	0.0059228	0.102875	8	0.97829	0.87542	--	--	--	--	CsaV3_4G026960|+	--
chr6	8106010	8106081	-	0.020756	0.103667	8	0.97712	0.87346	--	CsaV3_6G010000|	--	--	CsaV3_6G010010|-	--
chr5	7452577	7452988	+	0.027262	0.133267	5	0.99233	0.85907	--	--	--	--	CsaV3_5G012300|-	--
chr7	9714626	9714810	+	2.72e-06	0.138175	19	0.22214	0.083965	--	--	--	--	CsaV3_7G021250|-	--
chr6	15132658	15133650	-	0.024988	0.146926	36	0.57059	0.42367	CsaV3_6G022140.1.cds1	--	CsaV3_6G022140.1.exon1	CsaV3_6G022140|	--	CsaV3_6G022130|
chr1	9145020	9145105	-	0.00039422	0.147872	13	0.9641	0.81623	--	--	--	--	CsaV3_1G013850|+	--
chr2	13916648	13916767	-	0.029102	0.154098	17	0.67951	0.52541	--	--	--	--	CsaV3_2G016710|-	--
chr4	823570	823684	-	0.011167	0.171583	8	0.90525	0.73367	--	CsaV3_4G001440|	--	--	CsaV3_4G001440|-	--
chr5	23393779	23393932	-	0.0043628	0.182861	12	0.64425	0.46139	--	--	--	CsaV3_5G028240|	CsaV3_5G028260|-	CsaV3_5G028250|
chr3	14475043	14475123	-	0.034084	0.184833	6	0.79833	0.6135	CsaV3_3G018760.1.cds1	CsaV3_3G018750|	CsaV3_3G018760.1.exon1	CsaV3_3G018760|	--	CsaV3_3G018770|
chr7	7425922	7426159	-	1.08e-05	0.200787	25	0.7756	0.57481	--	--	--	--	CsaV3_7G014950|+	--
chr6	12280850	12280916	+	0.049509	0.271267	5	0.46927	0.198	--	--	--	--	CsaV3_6G016410|+	--
chr3	25598288	25598368	-	0.027997	0.275333	5	0.75033	0.475	--	--	--	--	CsaV3_3G029860|-	--
chr1	31508732	31508876	+	0.0017931	0.287037	9	0.61296	0.32593	--	--	--	--	CsaV3_1G045670|+	CsaV3_1G045660|
Table S1b CHG-FNLs_vs_NFNLs_DMR_Annotation
chr	start	end	strand	q-value	methyl-diff	CpGs	FNL	NFNL	cds	downstream 2kb	exon	gene body	intergenic	upstream 2kb
chr5	14571871	14571955	+	0.049827	0.289095	7	0.70843	0.41933	--	--	--	CsaV3_5G019980|,CsaV3_5G019970|	--	--
chr6	15133132	15134453	-	2.14e-05	0.197586	29	0.67693	0.47934	CsaV3_6G022140.1.cds1	--	CsaV3_6G022140.1.exon1	CsaV3_6G022140|	CsaV3_6G022150|-	CsaV3_6G022140|
chr6	494348	494962	-	0.047554	-0.134086	27	0.77815	0.91223	CsaV3_6G000780.1.cds1	CsaV3_6G000770|	CsaV3_6G000780.1.exon1	CsaV3_6G000780|	--	CsaV3_6G000790|
chr7	11701100	11701529	-	1.26e-08	-0.1866	15	0.0044	0.191	--	--	--	--	CsaV3_7G022810|+	--
chr7	13242724	13244763	+	8.61e-08	-0.149528	36	0.069	0.21853	--	--	--	--	CsaV3_7G024250|-	--
scaffold18_1	208832	209038	+	0.0018217	-0.134879	11	0.13361	0.26848	--	--	--	--	CsaV3_UNG201530|+	--
scaffold18_1	213965	214148	-	0.0072462	-0.121091	11	0.025939	0.14703	--	--	--	--	CsaV3_UNG201530|+	--
Table S1c CHH-FNLs_vs_NFNLs_DMR_Annotation
chr	start	end		q-value	methyl-diff	CpGs	FNL	NFNL	cds	downstream 2kb	exon	gene body	intergenic	upstream 2kb
chr1	10015324	10015405	-	0.034199	-0.184933	5	0.61047	0.7954	--	--	--	--	CsaV3_1G014510|-	--
chr1	10030325	10030412	-	0.047042	-0.158778	6	0.37806	0.53683	--	CsaV3_1G014510|	--	--	CsaV3_1G014510|-	--
chr1	10078552	10078661	-	0.00013632	-0.154148	9	0.030815	0.18496	--	--	--	--	CsaV3_1G014530|+	--
chr1	10090348	10090436	-	0.035136	-0.310733	5	0.10347	0.4142	--	--	--	--	CsaV3_1G014540|-	--
chr1	10105614	10105857	-	0.00048107	0.310619	7	0.43929	0.12867	--	CsaV3_1G014570|	--	--	CsaV3_1G014570|-	--
chr1	10133581	10133687	-	0.0013434	0.169316	19	0.76156	0.59225	--	--	--	--	CsaV3_1G014590|+	CsaV3_1G014590|
chr1	10162370	10162523	-	1.26e-05	-0.233593	18	0.29611	0.5297	--	--	--	--	CsaV3_1G014620|+	--
chr1	10171821	10171900	-	0.00033835	-0.235694	12	0.26928	0.50497	--	CsaV3_1G014620|	--	--	CsaV3_1G014630|-	--
chr1	10207198	10207263	-	0.00026464	-0.272077	13	0.50205	0.77413	--	--	--	--	CsaV3_1G014670|+	--
chr1	10215411	10215547	-	0.00048816	0.213022	15	0.55624	0.34322	--	--	--	--	CsaV3_1G014670|+	--
chr1	10238311	10238381	-	0.0023966	-0.190375	8	0.57975	0.77012	--	CsaV3_1G014680|	--	--	CsaV3_1G014690|-	--
chr1	10243482	10243542	-	0.021351	-0.112983	20	0.52612	0.6391	CsaV3_1G014690.1.cds1	--	CsaV3_1G014690.1.exon1	CsaV3_1G014690|	--	--
chr1	10261809	10262044	-	0.034369	0.1039	20	0.44578	0.34188	--	--	--	--	CsaV3_1G014710|-	--
chr1	10264435	10264505	-	0.035233	-0.166762	7	0.31986	0.48662	--	--	--	--	CsaV3_1G014710|-	--
chr1	10268282	10268413	-	0.0032014	0.183929	14	0.85288	0.66895	--	--	--	--	CsaV3_1G014710|-	--
chr1	10274819	10274918	-	0.0014728	-0.21459	13	0.53195	0.74654	--	--	--	--	CsaV3_1G014720|-	CsaV3_1G014710|
chr1	10297151	10297288	-	0.010957	-0.18831	14	0.57719	0.7655	--	--	--	--	CsaV3_1G014730|+	CsaV3_1G014720|
chr1	10300578	10300654	-	5.82e-05	0.118513	13	0.95087	0.83236	--	--	--	--	CsaV3_1G014730|+	--
chr1	10324958	10325115	-	0.042199	-0.123405	14	0.74467	0.86807	--	--	--	--	CsaV3_1G014740|+	--
chr1	10356756	10356880	-	1.38e-06	-0.13246	21	0.8471	0.97956	--	--	--	--	CsaV3_1G014750|+	--
chr1	10435737	10435831	-	0.0033628	0.102857	14	0.95998	0.85712	--	--	--	--	CsaV3_1G014790|+	--
chr1	10482048	10482274	-	0.047042	0.109147	25	0.74543	0.63628	--	--	--	--	CsaV3_1G014850|+	--
chr1	10486678	10486770	-	0.028205	0.174364	11	0.25876	0.084394	--	--	--	--	CsaV3_1G014850|+	--
chr1	10487939	10488084	-	0.028556	0.201212	11	0.28167	0.080455	--	--	--	--	CsaV3_1G014850|+	--
chr1	10488133	10488394	-	0.0088732	0.167778	15	0.30658	0.1388	--	--	--	--	CsaV3_1G014850|+	--
chr1	10554002	10554065	-	0.0040279	0.264436	13	0.53656	0.27213	--	CsaV3_1G014910|	--	--	CsaV3_1G014910|-	--
chr1	10556922	10557115	-	5.69e-08	-0.235101	23	0.33006	0.56516	--	--	--	--	CsaV3_1G014920|+	CsaV3_1G014910|
chr1	1059435	1059570	-	0.006516	-0.160273	11	0.78564	0.94591	--	--	--	--	CsaV3_1G001630|+	--
chr1	10613011	10613073	-	0.00020754	0.159667	9	0.28696	0.1273	--	CsaV3_1G014960|	--	--	CsaV3_1G014960|-	--
chr1	10613080	10613141	-	0.003019	0.3046	5	0.61927	0.31467	--	CsaV3_1G014960|	--	--	CsaV3_1G014960|-	--
chr1	1062373	1062533	-	0.011239	-0.16019	21	0.44898	0.60917	--	--	--	--	CsaV3_1G001630|+	--
chr1	10839703	10839755	-	0.013173	0.224741	9	0.51315	0.28841	--	CsaV3_1G015250|	--	--	CsaV3_1G015260|+	--
chr1	10871973	10872076	-	3.69e-07	-0.109	12	0.027944	0.13694	--	--	--	--	CsaV3_1G015310|+	CsaV3_1G015300|
chr1	10878452	10878502	-	0.0027033	0.158133	10	0.2635	0.10537	--	--	--	--	CsaV3_1G015310|+	--
chr1	10878959	10879084	-	0.021118	0.121944	12	0.24903	0.12708	--	--	--	--	CsaV3_1G015310|+	--
chr1	1089037	1089154	-	0.00014943	0.177574	18	0.64956	0.47198	--	--	--	--	CsaV3_1G001690|+	CsaV3_1G001690|
chr1	10927309	10927377	-	1.08e-12	-0.128882	31	0.80541	0.93429	--	--	--	--	CsaV3_1G015360|+	CsaV3_1G015350|
chr1	10989329	10989561	-	0.0001871	-0.189417	16	0.23215	0.42156	--	--	--	--	CsaV3_1G015470|-	--
chr1	11048853	11048962	-	0.0030431	0.157806	12	0.37583	0.21803	--	--	--	--	CsaV3_1G015490|+	CsaV3_1G015490|
chr1	11070112	11070249	-	0.0047168	-0.173533	15	0.55336	0.72689	--	--	--	--	CsaV3_1G015550|+	--
chr1	11097061	11097153	-	0.003836	-0.260917	12	0.43758	0.6985	--	--	--	--	CsaV3_1G015570|+	CsaV3_1G015570|
chr1	11169480	11169603	-	0.02188	0.203148	18	0.65589	0.45274	--	--	--	--	CsaV3_1G015630|+	--
chr1	11182636	11182706	-	0.047042	0.158889	6	0.27661	0.11772	--	--	--	--	CsaV3_1G015640|-	--
chr1	11203716	11203824	-	1.29e-05	0.130609	29	0.89869	0.76808	--	--	--	--	CsaV3_1G015650|+	--
chr1	11251329	11251400	-	4.92e-06	0.150044	15	0.87467	0.72462	--	CsaV3_1G015700|	--	--	CsaV3_1G015690|+	CsaV3_1G015690|
chr1	11273452	11273572	-	0.0029303	-0.186937	21	0.58421	0.77114	--	--	--	--	CsaV3_1G015730|+	--
chr1	11319024	11319106	-	0.0014945	0.164	15	0.29836	0.13436	--	CsaV3_1G015770|	--	--	CsaV3_1G015790|+	CsaV3_1G015780|
chr1	11633199	11633315	-	0.00043279	0.159614	19	0.45689	0.29728	--	CsaV3_1G017090|	--	--	CsaV3_1G017100|+	--
chr1	1168178	1168257	-	0.047042	0.278	6	0.71883	0.44083	--	--	--	--	CsaV3_1G001800|+	CsaV3_1G001800|
chr1	11683023	11683078	-	1.34e-07	-0.124591	22	0.83735	0.96194	--	--	--	--	CsaV3_1G017150|+	CsaV3_1G017140|
chr1	11683454	11683508	-	0.00088246	-0.1455	12	0.50831	0.65381	--	--	--	--	CsaV3_1G017150|+	CsaV3_1G017140|
chr1	11822283	11822403	-	0.041267	0.103561	22	0.77852	0.67495	--	--	--	--	CsaV3_1G017280|+	--
chr1	11828605	11828935	-	0.0032679	-0.161905	14	0.21895	0.38086	--	--	--	--	CsaV3_1G017280|+	--
chr1	11830267	11830674	-	1.18e-05	-0.147479	32	0.53759	0.68507	--	--	--	--	CsaV3_1G017280|+	--
chr1	11833396	11833503	-	0.000319	0.163222	15	0.87902	0.7158	--	--	--	--	CsaV3_1G017280|+	CsaV3_1G017280|
chr1	11963892	11964046	-	0.025128	-0.123667	21	0.2484	0.37206	--	--	--	--	CsaV3_1G018370|+	--
chr1	1226362	1226508	-	0.013497	-0.201103	13	0.31687	0.51797	--	--	--	--	CsaV3_1G001890|+	--
chr1	1228771	1229142	-	8.62e-07	-0.161449	23	0.32236	0.48381	--	--	--	--	CsaV3_1G001890|+	--
chr1	1247808	1247863	-	0.001518	0.182125	8	0.88413	0.702	--	--	--	--	CsaV3_1G001910|+	--
chr1	1251107	1251302	-	0.022517	0.130315	18	0.56363	0.43331	--	--	--	--	CsaV3_1G001910|+	CsaV3_1G001910|
chr1	12780009	12780096	-	0.020222	-0.374333	5	0.17953	0.55387	--	--	--	--	CsaV3_1G021830|-	--
chr1	12785265	12785321	-	2.47e-08	0.1995	12	0.93742	0.73792	--	--	--	--	CsaV3_1G021830|-	--
chr1	12786180	12786236	-	0.009137	-0.148818	11	0.19655	0.34536	--	CsaV3_1G021830|	--	--	CsaV3_1G021830|-	--
chr1	12830423	12830555	-	3.1e-06	-0.229303	11	0.10088	0.33018	--	--	--	--	CsaV3_1G021870|+	--
chr1	13280504	13280738	-	0.01991	-0.129635	32	0.37854	0.50818	--	--	--	--	CsaV3_1G022930|-	CsaV3_1G022920|
chr1	13300313	13300379	-	0.027466	-0.123708	8	0.77692	0.90062	--	--	--	--	CsaV3_1G022940|-	CsaV3_1G022930|
chr1	13312751	13312815	-	0.012052	0.143872	13	0.24997	0.1061	--	--	--	--	CsaV3_1G022950|+	--
chr1	13313741	13313914	-	0.0023093	0.15042	27	0.44221	0.29179	--	--	--	--	CsaV3_1G022950|+	--
chr1	13340930	13341329	-	1.47e-06	-0.185811	30	0.36768	0.55349	--	--	--	--	CsaV3_1G022980|+	--
chr1	13367365	13367527	-	0.00016161	0.203048	14	0.65995	0.4569	--	--	--	--	CsaV3_1G023000|-	--
chr1	13367937	13368094	-	0.0072238	0.174367	20	0.62237	0.448	--	--	--	--	CsaV3_1G023000|-	--
chr1	13390290	13390343	-	0.018045	0.104556	6	0.98722	0.88267	--	--	--	--	CsaV3_1G023040|+	CsaV3_1G023040|
chr1	13402399	13402515	-	0.0028318	0.150352	18	0.35007	0.19972	--	--	--	--	CsaV3_1G023060|+	--
chr1	13404144	13404278	-	6.84e-09	0.190976	28	0.62014	0.42917	--	--	--	--	CsaV3_1G023060|+	--
chr1	13425457	13425564	-	0.0014698	0.214733	5	0.29473	0.08	--	--	--	--	CsaV3_1G023080|+	--
chr1	13426322	13426383	-	0.0041648	0.240385	13	0.58462	0.34423	--	--	--	--	CsaV3_1G023080|+	--
chr1	13426383	13426471	-	0.013722	0.176333	15	0.79876	0.62242	--	--	--	--	CsaV3_1G023080|+	--
chr1	13442081	13442159	-	0.0048661	0.167967	10	0.2386	0.070633	--	--	--	--	CsaV3_1G023100|+	CsaV3_1G023100|
chr1	13442325	13442392	-	0.042663	-0.174795	13	0.55205	0.72685	--	--	--	--	CsaV3_1G023100|+	CsaV3_1G023100|
chr1	13442687	13442785	-	0.028044	-0.14	12	0.67744	0.81744	--	--	--	--	CsaV3_1G023100|+	CsaV3_1G023100|
chr1	13533407	13533617	-	0.0039881	-0.143312	32	0.17583	0.31915	--	--	--	--	CsaV3_1G024100|-	--
chr1	13602627	13603096	-	0.00099773	-0.129914	27	0.71402	0.84394	--	--	--	--	CsaV3_1G024130|+	--
chr1	13609196	13609262	-	0.015173	0.133822	15	0.88971	0.75589	--	--	--	--	CsaV3_1G024130|+	--
chr1	13612886	13613004	-	0.0034296	0.18259	13	0.76556	0.58297	--	--	--	--	CsaV3_1G024130|+	--
chr1	13616247	13616320	-	0.0057535	-0.215056	12	0.46733	0.68239	--	--	--	--	CsaV3_1G024130|+	CsaV3_1G024130|
chr1	13679124	13679266	-	0.046586	-0.121205	13	0.79169	0.9129	--	--	--	--	CsaV3_1G024190|+	--
chr1	13709534	13709614	-	1.64e-06	0.223733	20	0.73467	0.51093	--	--	--	--	CsaV3_1G024190|+	--
chr1	1372140	1372269	-	5.21e-05	-0.12008	25	0.68972	0.8098	--	CsaV3_1G002120|	--	--	CsaV3_1G002120|-	--
chr1	13728088	13728190	-	0.00010584	-0.206018	19	0.35393	0.55995	--	--	--	--	CsaV3_1G024190|+	--
chr1	13732426	13732534	-	6.09e-05	0.200062	16	0.75927	0.55921	--	--	--	CsaV3_1G024190|	--	--
chr1	13797411	13797465	-	0.0081689	0.201233	10	0.76957	0.56833	--	CsaV3_1G024210|	--	--	CsaV3_1G024210|-	--
chr1	13837516	13837656	-	0.0030391	0.298	7	0.67543	0.37743	--	--	--	--	CsaV3_1G024230|-	--
chr1	1387260	1387432	-	0.033984	0.19513	18	0.8217	0.62657	--	--	--	CsaV3_1G002140|	--	--
chr1	13941966	13942336	-	0.010827	0.132412	38	0.60162	0.46921	--	--	--	--	CsaV3_1G024340|+	CsaV3_1G024340|
chr1	13975399	13975539	-	0.041034	-0.111095	14	0.41614	0.52724	--	--	--	--	CsaV3_1G024390|+	--
chr1	14006892	14007501	-	0.048415	0.168412	17	0.50547	0.33706	--	--	--	--	CsaV3_1G024430|+	--
chr1	14033663	14033808	-	0.013599	-0.210511	15	0.46922	0.67973	--	--	--	--	CsaV3_1G024430|+	--
chr1	14109102	14109252	-	0.033946	0.156965	19	0.52144	0.36447	--	--	--	--	CsaV3_1G025450|-	--
chr1	14120655	14120708	-	0.011726	0.202545	11	0.63315	0.43061	--	--	CsaV3_1G025460.1.exon1	CsaV3_1G025460|	--	--
chr1	14154332	14154477	-	4.03e-07	0.153683	21	0.5544	0.40071	--	--	--	CsaV3_1G025510|	--	--
chr1	14195267	14195432	-	5.61e-05	-0.142926	27	0.5038	0.64673	--	--	--	--	CsaV3_1G025550|-	CsaV3_1G025540|
chr1	14195513	14196175	-	0.0032066	0.121974	38	0.68288	0.5609	--	--	--	--	CsaV3_1G025550|-	--
chr1	14236688	14236816	-	0.034431	0.233267	5	0.62287	0.3896	--	--	--	--	CsaV3_1G025560|-	--
chr1	14342834	14342898	-	0.042751	-0.142567	10	0.3639	0.50647	--	--	--	--	CsaV3_1G026600|+	--
chr1	14369409	14369502	-	0.0025	-0.159389	12	0.58622	0.74561	--	CsaV3_1G026600|	--	--	CsaV3_1G026610|-	--
chr1	14369505	14369609	-	0.0085064	-0.103	23	0.68442	0.78742	--	CsaV3_1G026600|	--	--	CsaV3_1G026610|-	--
chr1	14444475	14444605	-	0.0011797	-0.107879	11	0.17539	0.28327	--	--	--	--	CsaV3_1G026660|+	--
chr1	14459499	14459567	-	0.018077	-0.1755	8	0.50329	0.67879	--	--	--	--	CsaV3_1G026690|-	CsaV3_1G026680|
chr1	14470312	14470366	-	0.018196	0.117	8	0.22588	0.10888	--	--	--	--	CsaV3_1G026700|+	--
chr1	14478592	14478884	-	0.0015826	0.100828	31	0.749	0.64817	--	--	--	--	CsaV3_1G026700|+	--
chr1	14497672	14497974	-	0.017765	0.107185	9	0.18852	0.081333	--	--	--	--	CsaV3_1G026700|+	--
chr1	14534334	14534458	-	0.0025658	0.245452	14	0.64681	0.40136	--	--	--	--	CsaV3_1G026730|+	--
chr1	14602659	14602742	-	2.43e-08	0.2245	10	0.30337	0.078867	--	--	--	--	CsaV3_1G026770|-	--
chr1	14603206	14603316	-	0.01859	0.168855	23	0.67732	0.50846	--	--	--	--	CsaV3_1G026770|-	--
chr1	147479	147546	-	0.027466	0.156792	8	0.46587	0.30908	--	CsaV3_1G000220|	--	--	CsaV3_1G000220|-	CsaV3_1G000200|
chr1	14780586	14780670	-	0.0030142	0.144292	16	0.34358	0.19929	--	--	--	--	CsaV3_1G027880|-	CsaV3_1G027870|
chr1	14816578	14816768	-	4.22e-06	-0.150045	22	0.70359	0.85364	--	--	--	--	CsaV3_1G027910|+	--
chr1	14816948	14817079	-	0.00029784	0.140286	14	0.24867	0.10838	--	--	--	--	CsaV3_1G027910|+	--
chr1	14856455	14856607	-	0.0011009	0.104984	21	0.31951	0.21452	--	--	--	CsaV3_1G027940|	--	--
chr1	14856683	14856754	-	1.53e-05	0.102933	15	0.4826	0.37967	--	--	--	CsaV3_1G027940|	--	--
chr1	14901554	14901612	-	0.004461	-0.151061	11	0.70973	0.86079	--	--	--	--	CsaV3_1G027980|+	--
chr1	14915521	14915653	-	0.0022266	0.167936	26	0.65459	0.48665	--	--	--	--	CsaV3_1G027980|+	CsaV3_1G027980|
chr1	14924003	14924072	-	0.039277	0.138542	8	0.31375	0.17521	--	--	--	--	CsaV3_1G027990|+	CsaV3_1G027990|
chr1	14957240	14957311	-	0.00028497	-0.224667	16	0.57573	0.8004	--	--	--	--	CsaV3_1G028030|+	--
chr1	14962422	14962534	-	0.049837	0.149641	13	0.69318	0.54354	--	--	--	--	CsaV3_1G028030|+	--
chr1	14985738	14985809	-	0.011403	-0.229867	5	0.1684	0.39827	--	--	--	--	CsaV3_1G028050|+	--
chr1	14992263	14992424	-	0.0045105	-0.210394	11	0.17276	0.38315	--	--	--	--	CsaV3_1G028050|+	--
chr1	14994781	14995148	-	0.028605	-0.125897	13	0.14272	0.26862	--	--	--	--	CsaV3_1G028050|+	--
chr1	14995753	14995877	-	0.0078998	-0.170271	16	0.5144	0.68467	--	--	--	--	CsaV3_1G028050|+	--
chr1	15002321	15002403	-	0.00021101	0.140778	15	0.24084	0.10007	--	--	--	--	CsaV3_1G028050|+	--
chr1	1500634	1500752	-	1.51e-16	-0.236407	27	0.099852	0.33626	--	--	--	--	CsaV3_1G002340|+	CsaV3_1G002340|
chr1	1510894	1510988	-	0.018838	0.177833	12	0.71419	0.53636	--	--	--	CsaV3_1G002380|	--	CsaV3_1G002370|
chr1	15146405	15146460	-	1.02e-07	-0.196867	15	0.72951	0.92638	--	--	--	--	CsaV3_1G028090|-	--
chr1	15203192	15203242	-	0.00088246	-0.183056	6	0.7245	0.90756	--	--	--	--	CsaV3_1G028100|-	--
chr1	1524490	1524572	-	0.01365	0.1991	10	0.4003	0.2012	--	CsaV3_1G002410|	--	--	CsaV3_1G002410|-	CsaV3_1G002400|
chr1	15245261	15245342	-	0.0084534	0.129593	9	0.24215	0.11256	--	--	--	--	CsaV3_1G028140|+	--
chr1	15268544	15268647	-	0.028495	-0.140222	9	0.083926	0.22415	--	--	--	--	CsaV3_1G028170|-	--
chr1	15301447	15301520	-	1.65e-08	-0.115345	29	0.27522	0.39056	--	--	--	--	CsaV3_1G028270|-	--
chr1	15373108	15373193	-	0.045375	0.165238	14	0.68417	0.51893	--	CsaV3_1G028330|	--	--	CsaV3_1G028330|-	--
chr1	15409350	15409400	-	0.001956	-0.119545	11	0.061394	0.18094	--	--	--	--	CsaV3_1G028380|-	--
chr1	15413660	15413745	-	0.0095011	0.13	11	0.1993	0.069303	--	CsaV3_1G028390|	--	--	CsaV3_1G028390|-	CsaV3_1G028380|
chr1	15433672	15433761	-	0.0051742	0.146	9	0.57659	0.43059	--	--	--	--	CsaV3_1G028410|+	CsaV3_1G028400|
chr1	15438167	15438303	-	0.00024468	-0.110241	18	0.36322	0.47346	--	--	--	--	CsaV3_1G028410|+	--
chr1	15438957	15439069	-	0.0047978	-0.183583	16	0.34102	0.5246	--	--	--	--	CsaV3_1G028410|+	--
chr1	15439519	15439637	-	2.94e-06	0.1015	12	0.11864	0.017139	--	--	--	--	CsaV3_1G028410|+	--
chr1	15452375	15452462	-	0.0067585	0.178385	13	0.41992	0.24154	--	--	--	--	CsaV3_1G028420|+	--
chr1	15621580	15621738	-	4.8e-07	0.116595	28	0.68605	0.56945	--	CsaV3_1G028680|	CsaV3_1G028670.1.exon1	CsaV3_1G028670|	--	--
chr1	15648083	15648136	-	0.035263	0.227095	7	0.64348	0.41638	--	--	--	--	CsaV3_1G028700|-	--
chr1	15649176	15649304	-	2.69e-10	-0.272	16	0.094021	0.36602	--	--	--	--	CsaV3_1G028700|-	--
chr1	15692313	15692408	-	4.7e-05	0.213833	14	0.57202	0.35819	--	--	--	--	CsaV3_1G028770|+	CsaV3_1G028770|
chr1	15704286	15704376	-	2.76e-07	0.113667	26	0.94365	0.82999	--	--	--	--	CsaV3_1G028780|+	--
chr1	15722359	15722501	-	0.00053064	0.288167	12	0.83322	0.54506	--	--	--	--	CsaV3_1G028800|+	CsaV3_1G028790|
chr1	1574679	1574897	-	4.39e-05	0.334646	16	0.7661	0.43146	--	CsaV3_1G002500|	--	CsaV3_1G002510|	--	--
chr1	15750438	15750518	-	0.0030701	-0.207524	7	0.054714	0.26224	--	CsaV3_1G028820|	--	--	CsaV3_1G028820|-	--
chr1	15762134	15762237	-	1.19e-09	0.199667	14	0.51167	0.312	--	--	--	--	CsaV3_1G028840|-	--
chr1	15828376	15828457	-	0.02247	-0.101911	15	0.42176	0.52367	--	CsaV3_1G028920|,CsaV3_1G028910|	--	--	CsaV3_1G028920|-	--
chr1	15873138	15873222	-	0.001528	-0.168578	15	0.44071	0.60929	--	--	--	--	CsaV3_1G029010|+	--
chr1	15932904	15932981	-	0.014175	0.111242	11	0.20124	0.09	--	--	--	--	CsaV3_1G029140|+	CsaV3_1G029130|
chr1	15942007	15942065	-	0.0037988	-0.113303	11	0.33755	0.45085	--	--	--	--	CsaV3_1G029140|+	--
chr1	15961057	15961157	-	0.0026773	0.145194	12	0.30108	0.15589	--	CsaV3_1G029150|	--	--	CsaV3_1G029150|-	--
chr1	15999780	15999957	-	0.029101	0.181439	19	0.73453	0.55309	--	--	--	CsaV3_1G029220|	--	--
chr1	16052502	16052596	-	2.46e-08	-0.16497	22	0.44792	0.61289	--	--	--	--	CsaV3_1G029270|+	--
chr1	16054034	16054107	-	0.0069682	0.211078	17	0.61014	0.39906	--	--	--	--	CsaV3_1G029270|+	--
chr1	16055216	16055302	-	3.77e-08	0.107391	23	0.9893	0.88191	--	--	--	--	CsaV3_1G029270|+	--
chr1	16077073	16077175	-	0.038976	-0.100044	15	0.45613	0.55618	--	--	--	--	CsaV3_1G029280|+	--
chr1	16114410	16114531	-	0.028529	0.172333	9	0.31678	0.14444	--	CsaV3_1G029310|	--	--	CsaV3_1G029310|-	--
chr1	16118116	16118206	-	0.00012953	-0.127797	23	0.64564	0.77343	--	CsaV3_1G029320|	--	--	CsaV3_1G029320|-	CsaV3_1G029310|
chr1	16123594	16123664	-	0.033518	0.1572	5	0.75987	0.60267	--	CsaV3_1G029340|	--	--	CsaV3_1G029340|-	CsaV3_1G029330|
chr1	16175691	16175757	-	0.034469	0.1442	5	0.22833	0.084133	--	CsaV3_1G029370|	--	--	CsaV3_1G029370|-	--
chr1	16243666	16243789	-	0.0016693	-0.1214	25	0.65409	0.77549	--	--	--	--	CsaV3_1G029420|+	--
chr1	16304122	16304182	-	0.02707	0.158292	8	0.89575	0.73746	--	--	--	--	CsaV3_1G029500|+	--
chr1	16333692	16333787	-	0.0048133	0.201923	13	0.52646	0.32454	--	--	--	--	CsaV3_1G029530|-	--
chr1	16380080	16380147	-	0.021071	0.175633	10	0.48987	0.31423	--	--	--	--	CsaV3_1G029600|+	CsaV3_1G029590|,CsaV3_1G029600|
chr1	1639705	1639768	-	3.36e-05	0.233364	11	0.67424	0.44088	--	--	--	--	CsaV3_1G002620|+	CsaV3_1G002610|,CsaV3_1G002620|
chr1	1639774	1639856	-	0.0061324	0.134024	14	0.51507	0.38105	--	--	--	--	CsaV3_1G002620|+	CsaV3_1G002610|,CsaV3_1G002620|
chr1	16428270	16428498	-	0.0036927	-0.1084	20	0.097217	0.20562	--	--	--	--	CsaV3_1G029660|+	--
chr1	16492413	16492495	-	0.00074246	-0.146667	11	0.45406	0.60073	--	--	--	--	CsaV3_1G029710|+	--
chr1	16530653	16530716	-	0.0060151	-0.110033	10	0.12127	0.2313	--	--	--	--	CsaV3_1G029750|+	--
chr1	16607468	16607674	-	5.99e-10	-0.160824	34	0.63011	0.79093	--	--	--	--	CsaV3_1G029830|+	--
chr1	16610250	16610375	-	0.01298	0.236296	9	0.7413	0.505	--	--	--	--	CsaV3_1G029830|+	--
chr1	1661554	1661686	-	4.1e-07	-0.148889	27	0.80935	0.95823	--	--	--	--	CsaV3_1G002650|+	--
chr1	1662506	1662630	-	0.0034047	0.178286	21	0.32957	0.15129	--	--	--	--	CsaV3_1G002650|+	--
chr1	16639621	16639756	-	0.00027811	-0.190412	17	0.58531	0.77573	--	--	--	--	CsaV3_1G029840|-	--
chr1	1667079	1667144	-	0.00044369	-0.32663	9	0.39619	0.72281	--	CsaV3_1G002650|,CsaV3_1G002670|	--	--	CsaV3_1G002670|-	CsaV3_1G002680|,CsaV3_1G002660|
chr1	16710941	16711047	-	0.039358	0.154167	8	0.23638	0.082208	--	--	--	--	CsaV3_1G029950|+	--
chr1	16732937	16733027	-	0.020455	-0.184333	9	0.64344	0.82778	--	CsaV3_1G029980|	--	--	CsaV3_1G029980|-	--
chr1	16741004	16741062	-	0.0040921	-0.15075	8	0.38579	0.53654	--	--	--	--	CsaV3_1G030000|+	--
chr1	16749724	16749871	-	0.012913	-0.213111	9	0.22896	0.44207	--	--	--	--	CsaV3_1G030000|+	CsaV3_1G030000|
chr1	16762148	16762461	-	0.0032374	0.188576	11	0.85015	0.66158	--	--	--	--	CsaV3_1G030010|+	--
chr1	16764330	16764461	-	0.012494	0.160152	11	0.52133	0.36118	--	--	--	--	CsaV3_1G030010|+	--
chr1	16833659	16834178	-	0.01502	0.154608	40	0.58144	0.42683	--	--	--	--	CsaV3_1G030100|-	--
chr1	16836389	16836536	-	3.26e-05	-0.125413	21	0.65714	0.78256	--	--	--	--	CsaV3_1G030100|-	--
chr1	16860471	16860564	-	0.00088246	0.305389	6	0.70728	0.40189	--	--	--	--	CsaV3_1G030120|-	CsaV3_1G030110|
chr1	16908430	16908505	-	0.0015278	-0.132044	15	0.38669	0.51873	--	--	--	--	CsaV3_1G030160|-	--
chr1	16949603	16949708	-	0.0015757	0.142261	23	0.72307	0.58081	--	--	--	--	CsaV3_1G030200|-	--
chr1	16979042	16979159	-	0.0036504	-0.125738	14	0.51055	0.63629	--	--	--	--	CsaV3_1G030210|+	--
chr1	16980017	16980213	-	1.66e-22	-0.111857	49	0.86871	0.98057	--	--	--	--	CsaV3_1G030210|+	--
chr1	16994028	16994147	-	0.00069396	0.224111	18	0.55031	0.3262	--	--	--	--	CsaV3_1G030220|+	--
chr1	17015346	17015473	-	0.0099824	-0.127083	8	0.074792	0.20188	--	CsaV3_1G030230|	--	--	CsaV3_1G030240|-	--
chr1	17050297	17050392	-	0.0047397	0.169156	15	0.58478	0.41562	--	--	--	--	CsaV3_1G030260|-	--
chr1	17061459	17061540	-	0.00073467	-0.188542	16	0.57321	0.76175	--	--	--	--	CsaV3_1G030270|+	CsaV3_1G030270|
chr1	17070213	17070326	-	0.00016015	-0.153593	27	0.58993	0.74352	--	CsaV3_1G030290|	--	--	CsaV3_1G030300|+	CsaV3_1G030280|
chr1	17070793	17070900	-	0.0027609	0.124515	11	0.36491	0.24039	--	CsaV3_1G030290|	--	--	CsaV3_1G030300|+	CsaV3_1G030280|
chr1	17092750	17092889	-	0.0023431	-0.118222	12	0.12369	0.24192	--	CsaV3_1G030300|	--	--	CsaV3_1G030320|+	CsaV3_1G030330|,CsaV3_1G030320|
chr1	17117256	17117323	-	5.38e-06	0.125298	19	0.94139	0.81609	--	--	--	--	CsaV3_1G030350|+	--
chr1	17292395	17292577	-	0.0014632	0.229583	16	0.4711	0.24152	--	--	--	--	CsaV3_1G030450|-	--
chr1	17292747	17292948	-	4.73e-05	-0.217911	30	0.31764	0.53556	--	--	--	--	CsaV3_1G030450|-	--
chr1	17315192	17315247	-	0.010836	0.210133	5	0.73593	0.5258	--	--	--	--	CsaV3_1G030450|-	--
chr1	17421680	17421740	-	0.00052889	-0.125722	12	0.61325	0.73897	--	--	--	--	CsaV3_1G030500|+	CsaV3_1G030500|
chr1	17448904	17449037	-	2.82e-11	-0.169306	24	0.094167	0.26347	--	--	--	CsaV3_1G030530|	--	--
chr1	17449680	17449893	-	0.00032382	-0.162448	29	0.57779	0.74024	--	--	--	CsaV3_1G030530|	--	--
chr1	17458340	17458401	-	4.51e-07	0.133883	20	0.20612	0.072233	--	CsaV3_1G030540|	--	--	CsaV3_1G030550|+	CsaV3_1G030550|
chr1	17569626	17569775	-	4.57e-05	0.182455	22	0.68289	0.50044	--	--	--	--	CsaV3_1G030650|+	--
chr1	17632793	17632921	-	0.00088715	-0.262967	10	0.2097	0.47267	--	--	--	--	CsaV3_1G030680|+	--
chr1	17722956	17723132	-	2.18e-07	0.223509	19	0.71795	0.49444	--	CsaV3_1G030750|	--	--	CsaV3_1G030760|+	--
chr1	17723706	17723757	-	0.0014611	-0.196	8	0.51113	0.70712	--	CsaV3_1G030750|	--	--	CsaV3_1G030760|+	--
chr1	17768857	17768978	-	0.00072402	0.173396	16	0.86215	0.68875	--	--	--	--	CsaV3_1G030790|+	CsaV3_1G030790|
chr1	17783630	17783709	-	0.028466	-0.113944	6	0.11433	0.22828	--	CsaV3_1G030800|	--	--	CsaV3_1G030810|-	--
chr1	1784876	1784970	-	0.041264	0.16597	11	0.44515	0.27918	--	CsaV3_1G002830|	--	--	CsaV3_1G002840|+	--
chr1	1785091	1785217	-	0.020455	-0.105644	15	0.13429	0.23993	--	CsaV3_1G002830|	--	--	CsaV3_1G002840|+	--
chr1	17998607	17998707	-	9.69e-10	0.103185	27	0.94878	0.84559	--	--	--	--	CsaV3_1G030980|-	--
chr1	18003433	18003518	-	3.44e-07	0.118697	22	0.96159	0.84289	--	--	--	--	CsaV3_1G030980|-	--
chr1	180055	180105	-	0.018045	0.158611	6	0.82961	0.671	--	CsaV3_1G000280|	--	--	CsaV3_1G000280|-	CsaV3_1G000290|
chr1	18009707	18009761	-	0.00045143	-0.10875	8	0.88163	0.99037	--	--	--	--	CsaV3_1G030980|-	--
chr1	18030995	18031054	-	0.035056	-0.136524	7	0.54648	0.683	--	--	--	--	CsaV3_1G030980|-	--
chr1	18031490	18031726	-	0.0099443	0.104483	20	0.23918	0.1347	--	--	--	--	CsaV3_1G030980|-	--
chr1	18047100	18047261	-	2.87e-08	-0.190526	19	0.11168	0.30221	--	--	--	--	CsaV3_1G030990|-	--
chr1	18047860	18048143	-	0.00011975	-0.163061	11	0.62591	0.78897	--	--	--	--	CsaV3_1G030990|-	--
chr1	18094520	18094633	-	0.0065614	-0.209929	14	0.45064	0.66057	--	--	--	--	CsaV3_1G031010|+	--
chr1	1812476	1812600	-	0.00088112	-0.152278	12	0.030083	0.18236	--	CsaV3_1G002900|	--	--	CsaV3_1G002900|-	CsaV3_1G002890|
chr1	18153188	18153312	-	0.00084722	0.161576	11	0.43179	0.27021	--	--	--	--	CsaV3_1G031040|+	--
chr1	18202757	18202868	-	0.027721	0.157148	9	0.30522	0.14807	--	--	--	--	CsaV3_1G031060|-	--
chr1	1825254	1825365	-	0.0040547	0.191111	15	0.79827	0.60716	--	--	--	--	CsaV3_1G002920|+	CsaV3_1G002910|
chr1	1826191	1826312	-	4.97e-07	0.186022	15	0.60673	0.42071	--	--	--	--	CsaV3_1G002920|+	CsaV3_1G002910|
chr1	18320602	18320834	-	0.027466	0.154923	13	0.55133	0.39641	--	--	--	--	CsaV3_1G031130|+	--
chr1	18321534	18321587	-	1.96e-05	0.316194	12	0.57575	0.25956	--	--	--	--	CsaV3_1G031130|+	--
chr1	18346246	18346357	-	0.029278	0.180027	25	0.789	0.60897	--	--	--	--	CsaV3_1G031130|+	--
chr1	18347058	18347111	-	0.0026913	-0.185167	10	0.15667	0.34183	--	--	--	--	CsaV3_1G031130|+	--
chr1	1835606	1835741	-	4.9e-06	-0.217767	20	0.46962	0.68738	--	CsaV3_1G002920|	--	--	CsaV3_1G002930|+	CsaV3_1G002930|
chr1	18414848	18414930	-	0.026031	0.191881	14	0.70071	0.50883	--	--	--	--	CsaV3_1G031200|+	--
chr1	18432954	18433050	-	0.0060674	-0.184111	15	0.5414	0.72551	--	CsaV3_1G031220|	--	--	CsaV3_1G031230|-	--
chr1	18433799	18434052	-	0.0145	-0.184889	12	0.44922	0.63411	--	--	--	--	CsaV3_1G031230|-	--
chr1	1844453	1844577	-	0.018045	0.200689	15	0.60047	0.39978	--	--	--	--	CsaV3_1G002960|+	CsaV3_1G002940|
chr1	18495052	18495298	-	0.040521	-0.167852	9	0.33089	0.49874	--	CsaV3_1G031290|,CsaV3_1G031310|,CsaV3_1G031300|	--	--	CsaV3_1G031310|-	--
chr1	18568467	18568517	-	0.0001154	-0.128976	14	0.24295	0.37193	--	--	--	--	CsaV3_1G031430|-	CsaV3_1G031420|
chr1	18579595	18579684	-	0.0035751	0.137649	19	0.54663	0.40898	--	--	--	--	CsaV3_1G031440|-	--
chr1	18614682	18614975	-	1.01e-05	0.197212	11	0.73845	0.54124	--	--	--	--	CsaV3_1G031510|+	CsaV3_1G031510|
chr1	18630071	18630126	-	0.00047849	-0.263152	11	0.49785	0.761	--	CsaV3_1G031530|	--	--	CsaV3_1G031540|-	--
chr1	18641799	18641956	-	5.42e-13	-0.118333	53	0.84439	0.96272	--	CsaV3_1G031550|	--	--	CsaV3_1G031560|+	--
chr1	18643741	18643839	-	0.0062354	0.116744	13	0.70105	0.58431	--	--	--	--	CsaV3_1G031560|+	--
chr1	1864393	1864447	-	0.020896	0.212067	5	0.82967	0.6176	--	--	--	--	CsaV3_1G002990|+	--
chr1	18687239	18687324	-	4.02e-05	0.108593	9	0.15137	0.042778	--	--	--	--	CsaV3_1G031620|+	--
chr1	18695503	18695771	-	0.0084102	-0.186095	7	0.092667	0.27876	--	--	--	--	CsaV3_1G031620|+	CsaV3_1G031620|
chr1	18709281	18709417	-	0.0058818	0.126562	16	0.5254	0.39883	--	--	--	--	CsaV3_1G031650|+	--
chr1	18721549	18721629	-	0.013776	0.12919	7	0.26819	0.139	--	--	--	--	CsaV3_1G031660|+	--
chr1	18721755	18721943	-	0.0073182	0.109824	17	0.38416	0.27433	--	--	--	--	CsaV3_1G031660|+	--
chr1	18737227	18737288	-	1.41e-07	0.241718	13	0.51262	0.2709	--	--	--	--	CsaV3_1G031670|+	CsaV3_1G031670|
chr1	18788033	18788087	-	0.0044003	0.228292	8	0.72275	0.49446	--	--	--	--	CsaV3_1G031740|+	--
chr1	18792981	18793033	-	0.037646	0.155	8	0.52358	0.36858	--	--	--	--	CsaV3_1G031740|+	CsaV3_1G031740|
chr1	18812853	18812913	-	0.0035935	0.194788	11	0.55197	0.35718	--	--	--	--	CsaV3_1G031770|+	CsaV3_1G031760|
chr1	18847591	18847663	-	0.017733	0.11259	13	0.75444	0.64185	--	--	--	--	CsaV3_1G031800|+	--
chr1	18957477	18957547	-	3.3e-07	0.344778	9	0.66196	0.31719	--	CsaV3_1G031900|	CsaV3_1G031910.1.exon1,CsaV3_1G031920.1.exon6	CsaV3_1G031910|,CsaV3_1G031920|	--	--
chr1	18969725	18969863	-	2.07e-05	-0.218617	20	0.2403	0.45892	--	--	--	--	CsaV3_1G031940|+	CsaV3_1G031920|
chr1	18980720	18980943	-	5.44e-06	-0.126667	11	0.50609	0.63276	--	--	--	--	CsaV3_1G031940|+	CsaV3_1G031940|
chr1	19026183	19026306	-	0.018184	-0.148792	8	0.041	0.18979	--	--	--	--	CsaV3_1G032010|+	--
chr1	19092897	19092990	-	0.0098573	-0.109167	20	0.68332	0.79248	--	--	--	--	CsaV3_1G032100|+	--
chr1	19159642	19159726	-	0.033946	0.118533	15	0.87751	0.75898	--	--	CsaV3_1G032190.1.exon1	CsaV3_1G032190|	--	CsaV3_1G032200|
chr1	19176828	19176886	-	0.011021	0.197067	5	0.28413	0.087067	--	--	--	--	CsaV3_1G032210|+	--
chr1	19188604	19188689	-	0.021376	0.166533	10	0.8758	0.70927	--	CsaV3_1G032230|,CsaV3_1G032220|	--	--	CsaV3_1G032230|-	--
chr1	1921855	1921932	-	0.009401	-0.177758	11	0.54776	0.72552	--	--	--	--	CsaV3_1G003070|+	--
chr1	1923228	1923288	-	7.06e-10	-0.145667	14	0.84752	0.99319	--	--	--	--	CsaV3_1G003070|+	--
chr1	19257971	19258265	-	0.0036384	0.136796	18	0.5445	0.4077	--	--	--	--	CsaV3_1G032300|+	CsaV3_1G032300|,CsaV3_1G032290|
chr1	19269453	19269517	-	0.024166	0.237381	7	0.61038	0.373	--	--	--	--	CsaV3_1G032310|-	--
chr1	19322098	19322150	-	0.033476	-0.1538	5	0.054933	0.20873	--	--	--	--	CsaV3_1G032360|+	--
chr1	19346811	19346989	-	0.0051239	-0.119467	15	0.10578	0.22524	--	--	--	--	CsaV3_1G032390|+	--
chr1	19364489	19364628	-	0.00058273	0.112857	21	0.2211	0.10824	--	--	--	--	CsaV3_1G032400|-	--
chr1	19377651	19377711	-	6.66e-08	0.221167	14	0.94357	0.7224	--	--	--	CsaV3_1G032400|	--	--
chr1	19397878	19397977	-	0.0058987	-0.176944	12	0.23483	0.41178	--	CsaV3_1G032410|	--	--	CsaV3_1G032420|+	--
chr1	19405322	19405405	-	0.0044677	-0.198667	8	0.35992	0.55858	--	--	--	--	CsaV3_1G032420|+	--
chr1	19411538	19411629	-	0.01429	0.241143	7	0.35643	0.11529	--	--	--	--	CsaV3_1G032420|+	--
chr1	19413017	19413068	-	0.00016145	-0.219758	11	0.51506	0.73482	--	--	--	--	CsaV3_1G032420|+	--
chr1	1942686	1942772	-	0.024166	-0.146571	7	0.031667	0.17824	--	CsaV3_1G003120|	--	--	CsaV3_1G003120|-	--
chr1	19437937	19438013	-	0.04282	0.111233	10	0.82737	0.71613	--	CsaV3_1G032420|	--	--	CsaV3_1G032430|-	--
chr1	19456753	19456826	-	0.041632	0.101929	14	0.22445	0.12252	--	--	--	--	CsaV3_1G032440|-	--
chr1	19488917	19489074	-	0.00019953	0.217229	16	0.58719	0.36996	--	--	--	--	CsaV3_1G032460|-	--
chr1	19524858	19524992	-	0.0027719	-0.150571	21	0.50056	0.65113	--	--	--	--	CsaV3_1G032500|+	--
chr1	19527911	19528020	-	0.00032898	0.173688	16	0.64383	0.47015	--	--	--	--	CsaV3_1G032500|+	--
chr1	19538836	19539030	-	0.0094468	0.176513	13	0.54062	0.3641	--	CsaV3_1G032500|	--	--	CsaV3_1G032510|+	--
chr1	19539925	19540037	-	0.0020085	-0.133759	18	0.79122	0.92498	--	CsaV3_1G032500|	--	--	CsaV3_1G032510|+	--
chr1	19547724	19547862	-	0.015438	0.191667	16	0.69744	0.50577	--	--	--	--	CsaV3_1G032510|+	--
chr1	19602811	19602904	-	0.0045073	-0.193178	15	0.38227	0.57544	--	--	--	--	CsaV3_1G032570|+	--
chr1	19624905	19625186	-	1.44e-11	-0.153022	31	0.76866	0.92168	--	--	--	--	CsaV3_1G032580|+	CsaV3_1G032580|
chr1	19683213	19683364	-	0.00058512	0.227455	11	0.345	0.11755	--	--	--	--	CsaV3_1G032630|-	--
chr1	19717478	19717606	-	0.0089873	-0.206788	11	0.41179	0.61858	--	CsaV3_1G032660|	--	--	CsaV3_1G032660|-	--
chr1	19744957	19745107	-	0.017141	0.1435	18	0.76056	0.61706	--	CsaV3_1G032680|	--	--	CsaV3_1G032690|+	CsaV3_1G032690|
chr1	19763586	19763717	-	0.011903	0.144833	14	0.79445	0.64962	--	--	--	--	CsaV3_1G032720|+	CsaV3_1G032710|
chr1	19764232	19764313	-	0.0064857	0.182818	11	0.84339	0.66058	--	--	--	--	CsaV3_1G032720|+	CsaV3_1G032710|
chr1	19832479	19832742	-	8.75e-08	0.19475	20	0.98138	0.78663	--	--	--	--	CsaV3_1G032770|+	--
chr1	19876467	19876602	-	0.030396	-0.155105	19	0.35846	0.51356	--	--	--	--	CsaV3_1G032820|+	CsaV3_1G032810|
chr1	1988281	1988429	-	0.038608	-0.145537	18	0.329	0.47454	--	CsaV3_1G003210|	--	--	CsaV3_1G003220|+	--
chr1	1988934	1989009	-	0.00033762	0.105714	21	0.77471	0.669	--	CsaV3_1G003210|	--	--	CsaV3_1G003220|+	--
chr1	19900089	19900277	-	0.0068319	-0.187533	30	0.5367	0.72423	--	--	--	--	CsaV3_1G032830|+	CsaV3_1G032830|
chr1	19915253	19915383	-	0.022469	0.142296	9	0.28485	0.14256	--	--	--	--	CsaV3_1G032840|+	--
chr1	19921642	19921693	-	0.00034374	-0.1293	10	0.4642	0.5935	--	--	--	--	CsaV3_1G032850|+	CsaV3_1G032850|
chr1	19921735	19921813	-	0.00026781	0.136708	8	0.439	0.30229	--	--	--	--	CsaV3_1G032850|+	CsaV3_1G032850|
chr1	19983991	19984059	-	0.002633	-0.1589	10	0.16817	0.32707	--	--	CsaV3_1G032910.1.exon5	CsaV3_1G032910|,CsaV3_1G032920|	--	--
chr1	19984377	19984491	-	0.0031326	-0.152437	16	0.30227	0.45471	--	CsaV3_1G032910|	--	CsaV3_1G032920|	--	--
chr1	19984559	19984699	-	0.025805	0.182333	14	0.59786	0.41552	--	CsaV3_1G032910|	--	CsaV3_1G032920|	--	--
chr1	19993454	19993578	-	0.020086	0.106972	12	0.82089	0.71392	--	--	--	--	CsaV3_1G032930|-	--
chr1	19993599	19993727	-	6.53e-07	-0.178783	23	0.56417	0.74296	--	--	--	--	CsaV3_1G032930|-	--
chr1	20000630	20000773	-	0.030907	0.19525	12	0.68517	0.48992	--	CsaV3_1G032930|	--	--	CsaV3_1G032930|-	--
chr1	20091172	20091309	-	0.0041108	0.126783	20	0.36835	0.24157	--	--	--	--	CsaV3_1G033070|+	--
chr1	20110261	20110374	-	0.0060352	0.199867	10	0.66293	0.46307	--	--	--	--	CsaV3_1G033090|+	--
chr1	20156007	20156086	-	0.035273	0.172143	7	0.66152	0.48938	--	--	--	--	CsaV3_1G033120|+	--
chr1	20174669	20174846	-	0.0057436	0.128333	17	0.84735	0.71902	--	CsaV3_1G033120|	--	--	CsaV3_1G033130|+	CsaV3_1G033130|
chr1	20175614	20175758	-	1.23e-05	-0.114619	21	0.75227	0.86689	--	--	--	--	CsaV3_1G033130|+	CsaV3_1G033130|
chr1	20188525	20188712	-	0.037644	-0.117524	21	0.14468	0.26221	--	CsaV3_1G033140|	--	--	CsaV3_1G033150|+	--
chr1	20222238	20222422	-	0.031522	0.118742	22	0.25382	0.13508	--	--	--	CsaV3_1G033210|	--	--
chr1	20237475	20237570	-	0.00012717	-0.194178	15	0.50993	0.70411	--	--	--	CsaV3_1G033210|	--	--
chr1	20239551	20239679	-	0.004031	0.147852	18	0.62811	0.48026	--	--	--	CsaV3_1G033210|	--	--
chr1	20239692	20239909	-	0.00092297	-0.149879	22	0.14647	0.29635	--	--	--	CsaV3_1G033210|	--	--
chr1	20270740	20271006	-	0.0013869	-0.185509	19	0.2147	0.40021	--	CsaV3_1G033250|	--	--	CsaV3_1G033250|-	--
chr1	20316997	20317047	-	4.62e-05	0.130095	14	0.28986	0.15976	--	--	--	--	CsaV3_1G033300|+	CsaV3_1G033300|
chr1	20317346	20317437	-	2.22e-09	-0.102373	25	0.85372	0.95609	CsaV3_1G033300.1.cds1	--	CsaV3_1G033300.1.exon1	--	CsaV3_1G033300|+	CsaV3_1G033300|
chr1	20420295	20420357	-	0.00049508	0.112429	7	0.25281	0.14038	--	CsaV3_1G033350|	--	--	CsaV3_1G033360|-	--
chr1	20434013	20434106	-	3.26e-05	-0.141894	22	0.78033	0.92223	--	--	--	CsaV3_1G033370|	--	--
chr1	2046969	2047071	-	0.0030233	-0.218718	13	0.21182	0.43054	--	CsaV3_1G003300|	--	--	CsaV3_1G003300|-	--
chr1	20527302	20527469	-	0.011457	-0.111564	26	0.26688	0.37845	--	--	--	--	CsaV3_1G033460|-	--
chr1	20551640	20551692	-	0.034446	-0.1318	5	0.45927	0.59107	--	--	--	--	CsaV3_1G033480|+	--
chr1	2061801	2061869	-	0.00099991	0.158333	10	0.53523	0.3769	--	--	--	--	CsaV3_1G003320|+	--
chr1	20640919	20641014	-	0.011792	0.133467	5	0.3056	0.17213	--	--	--	--	CsaV3_1G033560|+	--
chr1	2064475	2064594	-	0.027466	0.250542	8	0.59362	0.34308	--	--	--	--	CsaV3_1G003320|+	--
chr1	20652388	20652515	-	0.028414	0.145867	10	0.2565	0.11063	--	CsaV3_1G033580|	--	--	CsaV3_1G033580|-	CsaV3_1G033570|
chr1	20723221	20723401	-	0.0016207	0.168733	10	0.44783	0.2791	--	--	--	--	CsaV3_1G033640|-	--
chr1	20729507	20729578	-	3.29e-05	0.166333	17	0.92547	0.75914	--	--	--	--	CsaV3_1G033650|+	CsaV3_1G033640|
chr1	20733537	20733651	-	9.63e-07	-0.157756	26	0.47199	0.62974	--	--	--	--	CsaV3_1G033650|+	--
chr1	20746370	20746510	-	0.032487	0.183187	16	0.47719	0.294	--	--	--	CsaV3_1G033660|	--	--
chr1	20749975	20750194	-	0.0047552	-0.154056	12	0.36417	0.51822	--	--	--	--	CsaV3_1G033670|-	CsaV3_1G033660|
chr1	20753842	20753962	-	0.03266	-0.105788	22	0.65439	0.76018	--	--	CsaV3_1G033670.1.exon2	CsaV3_1G033670|	--	--
chr1	20757400	20757451	-	0.0032151	-0.209611	6	0.1415	0.35111	--	--	--	--	CsaV3_1G033680|-	CsaV3_1G033670|
chr1	20781411	20781565	-	2.24e-05	-0.17028	25	0.43396	0.60424	--	--	--	--	CsaV3_1G033700|-	--
chr1	20786735	20786788	-	0.0055802	0.219167	6	0.83583	0.61667	--	--	--	--	CsaV3_1G033700|-	--
chr1	2079243	2079402	-	0.0072764	0.20715	20	0.71032	0.50317	--	--	--	--	CsaV3_1G003350|+	CsaV3_1G003350|,CsaV3_1G003340|
chr1	20797476	20797581	-	0.0018166	-0.335185	9	0.39959	0.73478	--	--	--	--	CsaV3_1G033700|-	--
chr1	20835038	20835114	-	0.0010649	0.258271	16	0.69092	0.43265	--	--	--	--	CsaV3_1G033720|+	CsaV3_1G033720|
chr1	20944551	20944627	-	6.57e-05	-0.123933	10	0.0241	0.14803	--	CsaV3_1G033830|	--	--	CsaV3_1G033840|-	--
chr1	20945998	20946055	-	0.010476	-0.109852	9	0.10356	0.21341	--	--	--	--	CsaV3_1G033840|-	--
chr1	20999755	20999847	-	0.042734	-0.171111	9	0.48204	0.65315	--	--	--	CsaV3_1G033850|	CsaV3_1G033870|-	--
chr1	2102862	2103093	-	0.0038339	-0.170333	16	0.4399	0.61023	--	--	--	--	CsaV3_1G003380|+	CsaV3_1G003370|
chr1	21038124	21038273	-	3.93e-05	-0.176938	16	0.3969	0.57383	--	--	--	CsaV3_1G033890|	--	--
chr1	21045202	21045309	-	0.0010692	-0.130667	11	0.1747	0.30536	--	--	--	--	CsaV3_1G033900|+	--
chr1	21106516	21106622	-	2.1e-05	0.224	15	0.57767	0.35367	--	--	--	--	CsaV3_1G033940|+	CsaV3_1G033930|
chr1	21139160	21139210	-	0.0055802	0.2108	5	0.35667	0.14587	--	--	--	--	CsaV3_1G033960|+	CsaV3_1G033950|
chr1	21162462	21162641	-	0.018199	-0.233077	13	0.17213	0.40521	--	--	--	--	CsaV3_1G033970|-	--
chr1	21173660	21173726	-	0.00012164	0.12581	14	0.78843	0.66262	--	--	--	--	CsaV3_1G033980|+	--
chr1	21181815	21181898	-	0.0014	0.133417	12	0.8925	0.75908	--	--	--	--	CsaV3_1G033980|+	CsaV3_1G033980|
chr1	21194623	21194754	-	0.002067	0.214375	8	0.62917	0.41479	--	--	--	--	CsaV3_1G034000|+	CsaV3_1G033990|
chr1	21194971	21195042	-	0.0033121	-0.235848	11	0.44203	0.67788	--	--	--	--	CsaV3_1G034000|+	CsaV3_1G033990|
chr1	21216287	21216364	-	0.040646	-0.151	11	0.56679	0.71779	--	--	--	--	CsaV3_1G034000|+	--
chr1	21239276	21239343	-	0.037697	0.185472	12	0.64747	0.462	--	--	--	--	CsaV3_1G034020|+	--
chr1	21297085	21297151	-	0.033476	-0.1324	5	0.035067	0.16747	--	--	--	--	CsaV3_1G034080|-	--
chr1	21319899	21319964	-	0.001714	0.126667	7	0.16705	0.040381	--	--	--	--	CsaV3_1G034090|-	--
chr1	21322223	21322290	-	7.06e-06	-0.266897	13	0.35813	0.62503	--	--	--	--	CsaV3_1G034090|-	--
chr1	21362437	21362514	-	0.020318	0.215852	9	0.78774	0.57189	--	--	--	--	CsaV3_1G034120|-	CsaV3_1G034110|
chr1	21407100	21407214	-	2.39e-10	-0.206667	21	0.52492	0.73159	--	--	--	--	CsaV3_1G034170|-	--
chr1	21420823	21420877	-	0.040515	-0.182042	8	0.63787	0.81992	--	--	CsaV3_1G034170.1.exon7	CsaV3_1G034170|	--	CsaV3_1G034180|
chr1	21430818	21430922	-	0.013629	-0.158133	10	0.66397	0.8221	--	CsaV3_1G034190|	--	--	CsaV3_1G034200|-	--
chr1	21437739	21437791	-	5.39e-09	-0.211687	16	0.71398	0.92567	--	--	--	--	CsaV3_1G034210|+	CsaV3_1G034210|,CsaV3_1G034200|
chr1	21453995	21454097	-	4.85e-09	-0.198193	19	0.67918	0.87737	--	--	--	--	CsaV3_1G034250|-	CsaV3_1G034240|
chr1	21497756	21497816	-	0.012162	-0.1851	10	0.6667	0.8518	--	CsaV3_1G034320|	--	--	CsaV3_1G034320|-	--
chr1	21501037	21501103	-	9.76e-06	0.288396	16	0.75948	0.47108	--	--	--	--	CsaV3_1G034330|+	CsaV3_1G034320|
chr1	21506238	21506344	-	0.010886	-0.2612	5	0.24493	0.50613	--	--	--	--	CsaV3_1G034330|+	--
chr1	21556766	21556860	-	0.0047641	0.110983	20	0.80102	0.69003	--	--	--	CsaV3_1G034400|	--	CsaV3_1G034410|
chr1	21582614	21582683	-	0.0085366	-0.159296	9	0.15107	0.31037	--	--	--	--	CsaV3_1G034420|+	CsaV3_1G034420|
chr1	2158346	2158421	-	0.020489	0.174111	12	0.33272	0.15861	--	CsaV3_1G003450|	--	--	CsaV3_1G003460|-	--
chr1	21600019	21600146	-	4.15e-08	0.286246	19	0.75286	0.46661	--	--	--	--	CsaV3_1G034450|+	CsaV3_1G034440|
chr1	21601858	21601941	-	0.020573	-0.133545	11	0.085455	0.219	--	--	--	--	CsaV3_1G034450|+	CsaV3_1G034450|
chr1	21605469	21605531	-	2.85e-05	0.175111	12	0.92386	0.74875	--	--	--	CsaV3_1G034450|	--	--
chr1	21614772	21614997	-	0.0020506	0.168824	17	0.51957	0.35075	--	--	--	--	CsaV3_1G034470|+	--
chr1	21628233	21628293	-	0.046614	0.146278	12	0.26383	0.11756	--	--	--	CsaV3_1G034470|	--	CsaV3_1G034480|
chr1	21643527	21643798	-	0.047042	-0.163576	11	0.39645	0.56003	--	--	--	--	CsaV3_1G034500|+	CsaV3_1G034490|
chr1	21658960	21659038	-	0.047042	0.194444	6	0.81667	0.62222	--	CsaV3_1G034530|	--	--	CsaV3_1G034520|+	CsaV3_1G034510|,CsaV3_1G034520|
chr1	2166319	2166384	-	0.001231	0.156972	12	0.73978	0.58281	--	CsaV3_1G003470|	--	--	CsaV3_1G003470|-	CsaV3_1G003460|
chr1	21678115	21678339	-	0.00014579	-0.163267	25	0.47001	0.63328	--	CsaV3_1G034540|	--	--	CsaV3_1G034550|-	--
chr1	21678854	21678981	-	2.75e-06	0.125824	17	0.19118	0.065353	--	CsaV3_1G034540|,CsaV3_1G034550|	--	--	CsaV3_1G034550|-	--
chr1	21710808	21710957	-	0.00044888	-0.169583	20	0.41875	0.58833	--	--	--	--	CsaV3_1G034590|+	CsaV3_1G034580|
chr1	21941892	21941991	-	9.46e-06	-0.217361	12	0.18383	0.40119	--	--	--	--	CsaV3_1G035920|+	--
chr1	22114974	22115052	-	1.4e-07	-0.11653	22	0.80709	0.92362	--	--	--	--	CsaV3_1G036120|-	--
chr1	22165483	22165624	-	7.62e-06	0.191524	21	0.49214	0.30062	--	--	--	--	CsaV3_1G036200|+	--
chr1	22178651	22178703	-	0.011321	0.112125	8	0.44808	0.33596	--	CsaV3_1G036210|	--	--	CsaV3_1G036220|-	--
chr1	22187170	22187453	-	0.0020183	0.11588	25	0.27075	0.15487	--	--	--	--	CsaV3_1G036230|+	CsaV3_1G036220|
chr1	22246592	22247030	-	6.11e-13	0.155195	29	0.93537	0.78017	--	--	--	--	CsaV3_1G036290|-	CsaV3_1G036280|
chr1	22262027	22262188	-	0.029889	0.134018	19	0.47311	0.33909	--	--	--	--	CsaV3_1G036320|+	CsaV3_1G036310|
chr1	22263485	22263575	-	0.011576	0.221077	13	0.59195	0.37087	--	--	--	--	CsaV3_1G036320|+	CsaV3_1G036320|
chr1	22442024	22442123	-	0.0042421	0.180542	8	0.79738	0.61683	--	--	--	--	CsaV3_1G036530|+	CsaV3_1G036530|
chr1	22443910	22443972	-	0.00022627	0.15803	11	0.84597	0.68794	--	--	--	--	CsaV3_1G036530|+	CsaV3_1G036530|
chr1	22473552	22473661	-	0.006768	-0.125972	12	0.4095	0.53547	--	CsaV3_1G036610|	--	--	CsaV3_1G036610|-	CsaV3_1G036600|
chr1	22484195	22484289	-	0.0088686	0.133289	15	0.34091	0.20762	--	--	--	--	CsaV3_1G036630|+	CsaV3_1G036620|
chr1	22604375	22604551	-	0.0012642	0.155712	22	0.69603	0.54032	--	--	--	CsaV3_1G036750|	--	--
chr1	22634311	22634409	-	0.0097102	-0.209542	8	0.20175	0.41129	--	--	--	--	CsaV3_1G036780|+	--
chr1	22642463	22642580	-	0.029638	0.128937	21	0.6159	0.48697	--	CsaV3_1G036790|,CsaV3_1G036800|	--	--	CsaV3_1G036800|-	--
chr1	22648080	22648181	-	0.0145	0.214364	11	0.52164	0.30727	--	--	--	--	CsaV3_1G036810|+	--
chr1	22657029	22657093	-	0.038747	-0.11303	11	0.64176	0.75479	--	CsaV3_1G036810|	--	--	CsaV3_1G036820|+	--
chr1	22657569	22657808	-	0.00026794	0.162405	14	0.7494	0.587	--	CsaV3_1G036810|	--	--	CsaV3_1G036820|+	--
chr1	2266794	2266948	-	6.94e-05	-0.214588	17	0.23494	0.44953	--	CsaV3_1G003630|	--	--	CsaV3_1G003640|+	--
chr1	22720723	22720794	-	0.042803	0.141667	10	0.75627	0.6146	--	--	--	--	CsaV3_1G036870|+	--
chr1	22732630	22732718	-	0.00090181	0.103528	12	0.91122	0.80769	--	--	--	--	CsaV3_1G036870|+	--
chr1	22766622	22766994	-	0.00073021	0.226323	31	0.75591	0.52959	--	CsaV3_1G036890|	--	--	CsaV3_1G036890|-	--
chr1	22778707	22778834	-	0.0058788	0.215042	16	0.70733	0.49229	--	--	--	--	CsaV3_1G036900|-	--
chr1	22781523	22781657	-	0.014292	0.195212	11	0.33312	0.13791	--	--	--	--	CsaV3_1G036900|-	--
chr1	22796678	22796734	-	0.006492	0.135485	11	0.92491	0.78942	--	--	--	--	CsaV3_1G036900|-	--
chr1	22811080	22811131	-	0.0019648	-0.256667	9	0.65037	0.90704	--	CsaV3_1G036900|	--	--	CsaV3_1G036900|-	--
chr1	22811134	22811267	-	0.00024337	-0.104707	33	0.83984	0.94455	--	CsaV3_1G036900|	--	--	CsaV3_1G036900|-	--
chr1	22811272	22811440	-	4.26e-05	-0.172736	29	0.6696	0.84233	--	CsaV3_1G036900|	--	--	CsaV3_1G036900|-	--
chr1	22817985	22818108	-	0.019078	0.148146	16	0.80946	0.66131	--	--	--	--	CsaV3_1G036910|-	--
chr1	22835795	22835848	-	0.0088257	-0.202095	7	0.6189	0.821	--	--	--	--	CsaV3_1G036930|-	--
chr1	22863828	22863954	-	4.46e-06	-0.105872	13	0.10715	0.21303	--	--	--	--	CsaV3_1G036950|+	CsaV3_1G036950|
chr1	22865173	22865382	-	1.71e-08	0.124211	30	0.77567	0.65146	--	CsaV3_1G036960|	--	--	CsaV3_1G036950|+	CsaV3_1G036950|
chr1	22907111	22907190	-	0.0088257	-0.249667	7	0.33843	0.5881	--	CsaV3_1G037000|	--	--	CsaV3_1G037000|-	--
chr1	22919972	22920034	-	0.047042	0.133111	6	0.19706	0.063944	--	CsaV3_1G037010|	--	--	CsaV3_1G037020|+	--
chr1	22973783	22973852	-	0.0011773	0.170545	11	0.45636	0.28582	--	--	--	--	CsaV3_1G037040|+	--
chr1	22988179	22988239	-	0.028374	0.183593	9	0.40381	0.22022	--	--	--	--	CsaV3_1G037070|+	CsaV3_1G037060|
chr1	23000575	23000680	-	0.0058302	-0.109396	16	0.15883	0.26823	--	CsaV3_1G037070|	--	--	CsaV3_1G037080|+	--
chr1	23022966	23023099	-	0.0091455	0.156923	13	0.83264	0.67572	--	--	--	--	CsaV3_1G037110|+	--
chr1	23023377	23023437	-	0.0064263	-0.137333	12	0.25225	0.38958	--	--	--	--	CsaV3_1G037110|+	--
chr1	23032579	23032637	-	0.033493	0.225	5	0.8496	0.6246	--	--	--	--	CsaV3_1G037110|+	--
chr1	23035087	23035148	-	0.00676	0.210333	12	0.37533	0.165	--	--	--	--	CsaV3_1G037110|+	CsaV3_1G037110|
chr1	23075198	23075255	-	0.021281	0.194667	11	0.7513	0.55664	--	--	--	--	CsaV3_1G037150|+	CsaV3_1G037140|
chr1	23076158	23076460	-	0.00037267	0.190921	21	0.48656	0.29563	--	--	--	--	CsaV3_1G037150|+	CsaV3_1G037150|
chr1	23103083	23103138	-	0.0034311	0.271074	9	0.4903	0.21922	--	--	--	CsaV3_1G037180|	--	--
chr1	23119270	23119354	-	0.0083611	0.26337	9	0.50426	0.24089	--	CsaV3_1G037200|	--	--	CsaV3_1G037200|-	CsaV3_1G037190|
chr1	23137074	23137160	-	0.0081234	0.16781	14	0.35093	0.18312	--	--	--	CsaV3_1G037220|	--	--
chr1	23137973	23138152	-	0.027466	0.148759	18	0.63089	0.48213	--	--	--	CsaV3_1G037220|	--	CsaV3_1G037230|
chr1	2320685	2320789	-	0.0028612	0.106119	14	0.59564	0.48952	--	CsaV3_1G003710|	--	--	CsaV3_1G003720|+	--
chr1	23241247	23241452	-	3.43e-06	0.162678	29	0.88164	0.71897	--	CsaV3_1G037330|	--	--	CsaV3_1G037330|-	--
chr1	23297929	23298027	-	0.015213	0.123063	16	0.6161	0.49304	--	CsaV3_1G037400|	--	--	CsaV3_1G037400|-	--
chr1	23299205	23299370	-	0.0034076	0.203313	16	0.86483	0.66152	--	CsaV3_1G037400|	--	--	CsaV3_1G037400|-	--
chr1	23340150	23340253	-	0.00023619	-0.126842	19	0.71225	0.83909	--	--	--	--	CsaV3_1G037440|+	CsaV3_1G037430|
chr1	23342194	23342314	-	0.0057792	-0.119911	15	0.44131	0.56122	--	--	--	--	CsaV3_1G037440|+	--
chr1	2336811	2336925	-	0.034314	0.16281	21	0.79033	0.62752	--	CsaV3_1G003750|	--	--	CsaV3_1G003750|-	CsaV3_1G003740|,CsaV3_1G003760|
chr1	23370650	23371079	-	5.99e-10	0.150461	68	0.75051	0.60005	--	--	--	CsaV3_1G037460|	--	--
chr1	23439118	23439247	-	0.00072011	-0.101756	15	0.066778	0.16853	--	--	--	--	CsaV3_1G037520|+	--
chr1	23442035	23442162	-	1.83e-11	0.186056	24	0.96917	0.78311	--	--	--	--	CsaV3_1G037520|+	--
chr1	23454667	23454723	-	0.00026208	0.120286	7	0.47262	0.35233	--	--	--	CsaV3_1G037520|	--	--
chr1	23477269	23477392	-	0.042465	-0.245593	9	0.13807	0.38367	--	--	--	--	CsaV3_1G037550|-	--
chr1	23545366	23545502	-	1.15e-06	0.152246	19	0.33268	0.18044	--	--	--	CsaV3_1G037560|	CsaV3_1G037580|+	--
chr1	23578141	23578271	-	1.37e-06	-0.189764	24	0.32431	0.51407	--	--	--	--	CsaV3_1G037640|+	CsaV3_1G037640|
chr1	23579308	23579393	-	0.0044284	-0.118521	16	0.78373	0.90225	--	CsaV3_1G037640|,CsaV3_1G037650|	--	--	CsaV3_1G037650|-	--
chr1	23583186	23583301	-	0.028931	-0.12435	20	0.3425	0.46685	--	--	--	--	CsaV3_1G037660|-	CsaV3_1G037650|
chr1	23606275	23606388	-	0.0080713	-0.160296	9	0.43567	0.59596	--	--	--	--	CsaV3_1G037680|+	--
chr1	23626571	23626789	-	4.94e-06	0.185253	25	0.70123	0.51597	--	--	--	--	CsaV3_1G037680|+	--
chr1	23706171	23706276	-	0.029118	0.1578	10	0.40377	0.24597	--	--	--	--	CsaV3_1G037760|+	CsaV3_1G037750|
chr1	23711979	23712145	-	0.017239	0.143494	29	0.76256	0.61907	--	--	--	--	CsaV3_1G037760|+	CsaV3_1G037760|
chr1	23734500	23734697	-	2.15e-06	-0.150286	14	0.30733	0.45762	--	--	--	--	CsaV3_1G037780|+	--
chr1	23791857	23791941	-	0.0017418	0.182958	16	0.58923	0.40627	--	--	--	--	CsaV3_1G037920|-	--
chr1	23812831	23812964	-	0.04768	0.189424	11	0.42427	0.23485	--	--	--	--	CsaV3_1G037960|+	CsaV3_1G037960|
chr1	23879530	23879638	-	0.028529	-0.144704	9	0.24474	0.38944	--	--	--	--	CsaV3_1G038050|+	--
chr1	23938370	23938439	-	0.021604	-0.131879	11	0.15076	0.28264	--	CsaV3_1G038120|	--	--	CsaV3_1G038130|+	CsaV3_1G038130|
chr1	24073130	24073197	-	0.00013323	-0.109481	9	0.35178	0.46126	--	--	--	--	CsaV3_1G038290|+	CsaV3_1G038290|
chr1	24127881	24127954	-	0.028466	-0.156926	9	0.55652	0.71344	--	--	--	--	CsaV3_1G038370|+	--
chr1	24140218	24140269	-	0.00016322	0.144256	13	0.79054	0.64628	--	--	--	--	CsaV3_1G038380|+	CsaV3_1G038380|
chr1	24140272	24140335	-	5.38e-08	0.271521	16	0.8316	0.56008	--	--	--	--	CsaV3_1G038380|+	CsaV3_1G038380|
chr1	24154042	24154177	-	0.00016151	0.144641	13	0.45395	0.30931	--	--	--	--	CsaV3_1G038400|-	CsaV3_1G038390|
chr1	24162232	24162449	-	0.0065193	0.16569	29	0.31755	0.15186	--	--	--	--	CsaV3_1G038400|-	--
chr1	24213814	24213950	-	0.0056408	0.172604	16	0.64481	0.47221	--	--	--	--	CsaV3_1G038480|+	--
chr1	24214126	24214288	-	0.021517	0.1361	20	0.5563	0.4202	--	--	--	--	CsaV3_1G038480|+	--
chr1	24218062	24218151	-	0.028466	0.139111	6	0.22094	0.081833	--	--	--	--	CsaV3_1G038480|+	--
chr1	2425464	2425515	-	0.0067336	-0.125352	18	0.7745	0.89985	--	--	--	--	CsaV3_1G003920|+	CsaV3_1G003910|
chr1	24263207	24263290	-	0.0085504	0.158909	11	0.47803	0.31912	--	CsaV3_1G038530|	--	CsaV3_1G038520|	CsaV3_1G038540|-	--
chr1	24295232	24295559	-	0.0024919	-0.138444	33	0.40309	0.54154	--	--	--	--	CsaV3_1G038560|-	CsaV3_1G038550|
chr1	2431021	2431154	-	1.92e-05	-0.158842	19	0.70795	0.86679	--	--	--	--	CsaV3_1G003920|+	CsaV3_1G003920|
chr1	24316084	24316153	-	0.00021784	-0.147877	19	0.61477	0.76265	--	--	--	CsaV3_1G038570|	--	--
chr1	24401217	24401275	-	1.27e-06	0.153157	17	0.52937	0.37622	--	--	--	--	CsaV3_1G038740|+	CsaV3_1G038730|
chr1	2445397	2445511	-	0.047042	-0.234889	6	0.1285	0.36339	--	--	--	--	CsaV3_1G003950|+	CsaV3_1G003950|
chr1	24466517	24466579	-	0.037212	0.107121	11	0.85579	0.74867	--	--	--	--	CsaV3_1G038860|-	--
chr1	24482638	24482696	-	0.033476	-0.208667	12	0.52928	0.73794	--	--	--	--	CsaV3_1G038870|+	--
chr1	24483302	24483433	-	0.00025382	0.198275	23	0.54845	0.35017	--	--	--	--	CsaV3_1G038870|+	--
chr1	24610155	24610231	-	0.00088246	-0.148722	6	0.386	0.53472	--	--	--	--	CsaV3_1G039100|+	--
chr1	24622443	24622562	-	0.00058463	0.178611	24	0.82707	0.64846	--	--	--	CsaV3_1G039120|	--	--
chr1	24647919	24647991	-	0.027466	0.127875	8	0.2985	0.17063	--	--	--	--	CsaV3_1G039160|+	--
chr1	24670112	24670255	-	2.45e-05	0.192738	14	0.27026	0.077524	--	--	--	--	CsaV3_1G039170|+	CsaV3_1G039170|
chr1	24770904	24770966	-	0.0081142	0.147259	9	0.85293	0.70567	--	--	--	--	CsaV3_1G039330|+	--
chr1	24771773	24771844	-	0.029101	-0.168311	15	0.50689	0.6752	--	--	--	--	CsaV3_1G039330|+	--
chr1	24809027	24809190	-	0.00027391	0.178902	17	0.33918	0.16027	--	--	--	--	CsaV3_1G039360|-	--
chr1	24815386	24815453	-	0.035135	0.254286	7	0.86967	0.61538	--	--	--	--	CsaV3_1G039370|-	CsaV3_1G039360|
chr1	24817221	24817273	-	0.013711	-0.107133	10	0.3196	0.42673	--	--	--	--	CsaV3_1G039370|-	--
chr1	24842513	24842564	-	0.0032286	0.11675	12	0.64544	0.52869	--	--	--	--	CsaV3_1G039420|+	CsaV3_1G039410|
chr1	24904433	24904508	-	0.001296	0.230222	9	0.6877	0.45748	--	--	--	--	CsaV3_1G039530|-	--
chr1	24919557	24919620	-	0.018045	0.121333	6	0.14939	0.028056	--	CsaV3_1G039540|	--	--	CsaV3_1G039540|-	CsaV3_1G039530|
chr1	24924816	24924872	-	5.99e-06	0.183636	11	0.77603	0.59239	--	--	--	--	CsaV3_1G039550|+	CsaV3_1G039540|
chr1	24925142	24925478	-	0.0019668	0.117182	11	0.29709	0.17991	--	--	--	--	CsaV3_1G039550|+	CsaV3_1G039540|
chr1	24961180	24961230	-	0.00032975	-0.117	10	0.1774	0.2944	--	CsaV3_1G039610|	--	--	CsaV3_1G039610|-	--
chr1	24969059	24969354	-	2.33e-05	0.19844	25	0.58373	0.38529	--	--	--	--	CsaV3_1G039620|+	CsaV3_1G039620|
chr1	24999409	24999568	-	0.033476	-0.102667	17	0.26284	0.36551	--	--	--	--	CsaV3_1G039650|+	CsaV3_1G039650|
chr1	25000699	25000756	-	0.00099595	-0.156133	10	0.1829	0.33903	--	--	--	CsaV3_1G039650|	--	--
chr1	2516903	2517074	-	0.0014773	-0.126	13	0.19569	0.32169	--	--	--	--	CsaV3_1G004040|+	CsaV3_1G004030|
chr1	25184659	25184726	-	4.17e-11	0.197685	18	0.9008	0.70311	--	--	--	--	CsaV3_1G039790|-	CsaV3_1G039780|
chr1	25195418	25195494	-	0.00093468	0.141952	7	0.19519	0.053238	--	CsaV3_1G039820|	--	--	CsaV3_1G039830|-	--
chr1	25198791	25198924	-	9.88e-09	-0.21401	33	0.55206	0.76607	--	CsaV3_1G039830|	--	--	CsaV3_1G039830|-	CsaV3_1G039840|
chr1	25222734	25222922	-	0.00011149	-0.154333	22	0.30064	0.45497	--	--	--	--	CsaV3_1G039850|+	CsaV3_1G039850|
chr1	25260824	25261317	-	0.012817	0.19181	14	0.64138	0.44957	--	CsaV3_1G039900|	--	--	CsaV3_1G039900|-	CsaV3_1G039890|
chr1	25261772	25261880	-	0.00015932	-0.208286	21	0.48763	0.69592	--	CsaV3_1G039900|	--	--	CsaV3_1G039900|-	CsaV3_1G039890|
chr1	25263980	25264117	-	0.011324	-0.289267	5	0.37233	0.6616	--	--	--	--	CsaV3_1G039910|+	CsaV3_1G039910|,CsaV3_1G039900|
chr1	25285830	25285901	-	0.027477	0.154444	12	0.87806	0.72361	--	--	--	--	CsaV3_1G039950|-	CsaV3_1G039940|
chr1	25291963	25292059	-	0.03705	0.112867	5	0.3632	0.25033	--	--	--	--	CsaV3_1G039960|-	CsaV3_1G039950|
chr1	25296739	25296808	-	0.03444	-0.134289	15	0.60436	0.73864	--	--	--	--	CsaV3_1G039960|-	--
chr1	25312585	25312665	-	1.19e-07	-0.175333	12	0.10003	0.27536	--	--	--	--	CsaV3_1G039970|+	--
chr1	25390104	25390185	-	2.82e-05	-0.25425	12	0.26808	0.52233	--	--	--	--	CsaV3_1G040120|+	CsaV3_1G040110|,CsaV3_1G040120|
chr1	2540981	2541089	-	0.014433	-0.186167	12	0.38997	0.57614	--	--	--	--	CsaV3_1G004070|-	--
chr1	2542314	2542382	-	4.06e-05	-0.123255	17	0.83306	0.95631	--	--	--	--	CsaV3_1G004070|-	--
chr1	25568815	25568935	-	0.032895	-0.144548	14	0.1941	0.33864	--	--	--	--	CsaV3_1G040310|+	--
chr1	25640560	25640616	-	0.00093243	0.339429	7	0.64433	0.3049	--	CsaV3_1G040390|	--	--	CsaV3_1G040390|-	--
chr1	25648140	25648221	-	0.0070031	-0.218556	12	0.52919	0.74775	--	CsaV3_1G040400|	--	--	CsaV3_1G040400|-	--
chr1	25665156	25665240	-	0.0091543	-0.2294	10	0.46733	0.69673	--	--	--	--	CsaV3_1G040410|+	--
chr1	25708630	25708709	-	0.00020847	-0.184533	10	0.3249	0.50943	--	CsaV3_1G040450|	--	--	CsaV3_1G040460|+	CsaV3_1G040460|
chr1	25762642	25762695	-	0.00067757	-0.116907	18	0.78948	0.90639	--	--	--	--	CsaV3_1G040510|-	--
chr1	25768975	25769030	-	6.97e-06	0.254128	13	0.5539	0.29977	--	CsaV3_1G040510|	--	--	CsaV3_1G040510|-	--
chr1	25790476	25790555	-	0.0021838	-0.175139	12	0.33919	0.51433	--	--	--	--	CsaV3_1G040530|-	--
chr1	25791776	25791874	-	8.76e-05	0.233515	11	0.90921	0.6757	--	--	--	--	CsaV3_1G040530|-	--
chr1	25809630	25809870	-	3.87e-05	0.1316	10	0.17177	0.040167	--	CsaV3_1G040560|	--	--	CsaV3_1G040560|-	CsaV3_1G040550|
chr1	25809902	25810104	-	1.12e-06	0.289561	19	0.60572	0.31616	--	CsaV3_1G040560|	--	--	CsaV3_1G040560|-	CsaV3_1G040550|
chr1	25821324	25821406	-	0.0087708	0.205524	7	0.55381	0.34829	--	--	--	--	CsaV3_1G040580|+	CsaV3_1G040570|
chr1	25874109	25874541	-	0.000894	0.225167	12	0.4925	0.26733	--	--	--	--	CsaV3_1G040660|+	CsaV3_1G040650|
chr1	25876809	25876895	-	0.0059858	0.316583	8	0.68833	0.37175	--	--	--	--	CsaV3_1G040660|+	--
chr1	25880389	25880498	-	0.00031101	-0.203633	20	0.32438	0.52802	--	--	--	--	CsaV3_1G040660|+	--
chr1	25968048	25968205	-	0.020682	0.12568	25	0.68264	0.55696	--	CsaV3_1G040760|	--	--	CsaV3_1G040760|-	--
chr1	26028203	26028340	-	0.039059	0.1815	14	0.59505	0.41355	--	--	--	--	CsaV3_1G040850|+	CsaV3_1G040840|,CsaV3_1G040850|
chr1	26046734	26046952	-	0.012351	-0.12984	27	0.44894	0.57878	--	--	--	--	CsaV3_1G040870|+	CsaV3_1G040870|
chr1	26090546	26090598	-	0.010827	0.112533	5	0.13553	0.023	--	--	--	--	CsaV3_1G040980|+	CsaV3_1G040970|
chr1	26098426	26098525	-	0.0022952	0.223564	13	0.39564	0.17208	--	CsaV3_1G040980|	--	--	CsaV3_1G040990|+	CsaV3_1G040990|
chr1	26113187	26113314	-	2.45e-05	-0.142667	14	0.10962	0.25229	--	CsaV3_1G041020|	--	--	CsaV3_1G041020|-	--
chr1	26115517	26115614	-	0.00054137	-0.1404	10	0.11173	0.25213	--	--	--	--	CsaV3_1G041030|+	CsaV3_1G041020|
chr1	26233377	26233452	-	0.0055802	0.129889	6	0.14417	0.014278	--	--	--	--	CsaV3_1G041240|+	CsaV3_1G041240|
chr1	2623774	2623825	-	8.59e-08	0.102394	11	0.91145	0.80906	--	--	--	CsaV3_1G004190|	--	--
chr1	26296121	26296216	-	0.014573	0.101576	11	0.14818	0.046606	--	--	--	--	CsaV3_1G041340|+	--
chr1	26337214	26337280	-	0.035322	0.179905	7	0.66086	0.48095	--	--	--	--	CsaV3_1G041370|+	--
chr1	26356662	26356719	-	0.0033323	0.138641	13	0.63585	0.49721	--	--	--	--	CsaV3_1G041400|-	--
chr1	26369050	26369232	-	0.01179	0.176176	17	0.5258	0.34963	--	--	--	--	CsaV3_1G041410|+	CsaV3_1G041400|
chr1	26388369	26388448	-	0.020573	-0.110444	12	0.17714	0.28758	--	--	--	--	CsaV3_1G041440|+	CsaV3_1G041430|
chr1	26390349	26390513	-	0.011156	0.189333	8	0.46958	0.28025	--	--	--	--	CsaV3_1G041440|+	--
chr1	26441048	26441498	-	0.038674	0.124853	34	0.42407	0.29922	--	--	--	--	CsaV3_1G041500|+	CsaV3_1G041500|,CsaV3_1G041490|
chr1	26458421	26458491	-	0.047042	0.2285	6	0.75117	0.52267	--	--	--	--	CsaV3_1G041520|+	CsaV3_1G041520|,CsaV3_1G041510|
chr1	26484657	26484778	-	0.027531	-0.125633	20	0.55508	0.68072	--	--	--	--	CsaV3_1G041570|+	--
chr1	26532071	26532291	-	9.15e-08	0.137844	30	0.2529	0.11506	--	--	--	--	CsaV3_1G041640|+	CsaV3_1G041630|
chr1	26536647	26536713	-	0.024166	0.239143	7	0.71548	0.47633	--	--	--	--	CsaV3_1G041640|+	--
chr1	26539021	26539095	-	3.13e-05	-0.270233	10	0.35647	0.6267	--	--	--	--	CsaV3_1G041640|+	--
chr1	26549294	26549349	-	0.028095	-0.119485	11	0.069939	0.18942	--	--	--	--	CsaV3_1G041650|+	--
chr1	26584048	26584155	-	0.00021652	-0.118854	16	0.10579	0.22465	--	--	--	--	CsaV3_1G041670|+	CsaV3_1G041660|
chr1	26670866	26670930	-	0.0031053	-0.169278	12	0.075306	0.24458	--	CsaV3_1G041770|	--	--	CsaV3_1G041780|+	CsaV3_1G041780|
chr1	26680925	26681163	-	0.00033248	0.14256	28	0.64048	0.49792	--	--	--	--	CsaV3_1G041790|+	CsaV3_1G041790|
chr1	26681354	26681444	-	0.0032151	0.294037	9	0.57659	0.28256	--	--	--	--	CsaV3_1G041790|+	CsaV3_1G041790|
chr1	26751829	26751895	-	0.00066109	0.113949	13	0.35077	0.23682	--	--	--	--	CsaV3_1G041880|+	CsaV3_1G041870|
chr1	26754058	26754109	-	0.020549	0.189867	5	0.79	0.60013	--	--	--	--	CsaV3_1G041880|+	--
chr1	26775353	26775503	-	0.027546	0.191433	10	0.54447	0.35303	--	--	--	--	CsaV3_1G041910|+	CsaV3_1G041900|,CsaV3_1G041910|
chr1	26812754	26812863	-	0.038983	0.112822	15	0.61849	0.50567	--	--	--	--	CsaV3_1G041970|+	CsaV3_1G041970|
chr1	26818657	26818766	-	1.1e-05	-0.251667	15	0.16267	0.41433	--	--	--	CsaV3_1G041970|	--	--
chr1	26828367	26828424	-	0.017747	-0.176375	8	0.365	0.54138	--	--	CsaV3_1G041980.1.exon1	CsaV3_1G041980|	--	--
chr1	26851683	26851759	-	0.015876	0.116792	8	0.35375	0.23696	--	CsaV3_1G042010|	--	CsaV3_1G042030|	--	--
chr1	26853401	26853461	-	0.00013089	-0.229792	8	0.30146	0.53125	--	--	--	--	CsaV3_1G042040|+	CsaV3_1G042030|
chr1	26873187	26873259	-	0.0090527	0.133	15	0.72507	0.59207	--	CsaV3_1G042060|	--	--	CsaV3_1G042060|-	CsaV3_1G042050|
chr1	26920930	26921005	-	0.013179	0.224778	9	0.51748	0.2927	--	--	--	--	CsaV3_1G042140|-	CsaV3_1G042130|
chr1	26935402	26935481	-	0.014248	0.170524	7	0.26529	0.094762	--	--	--	--	CsaV3_1G042150|-	--
chr1	26971978	26972074	-	0.010367	0.202167	8	0.85663	0.65446	--	--	--	--	CsaV3_1G042170|+	CsaV3_1G042170|
chr1	26973572	26973682	-	0.012251	-0.118933	20	0.47642	0.59535	--	--	CsaV3_1G042170.1.exon1	CsaV3_1G042170|	--	--
chr1	26983872	26984014	-	0.0015406	0.151933	15	0.4888	0.33687	--	--	--	--	CsaV3_1G042180|-	--
chr1	26984512	26984578	-	0.011321	0.268867	5	0.42553	0.15667	--	--	--	--	CsaV3_1G042180|-	--
chr1	26988012	26988153	-	0.0053417	0.17251	17	0.70825	0.53575	--	--	--	--	CsaV3_1G042180|-	--
chr1	26989076	26989227	-	0.049238	-0.15104	25	0.50275	0.65379	--	CsaV3_1G042180|	--	--	CsaV3_1G042180|-	--
chr1	27010017	27010143	-	9.04e-10	0.289404	19	0.71986	0.43046	--	--	--	--	CsaV3_1G042190|+	CsaV3_1G042190|
chr1	27017118	27017181	-	0.017973	0.150542	8	0.39367	0.24312	--	--	--	--	CsaV3_1G042200|-	--
chr1	27032661	27032752	-	0.014282	0.2471	10	0.50927	0.26217	--	--	--	--	CsaV3_1G042210|-	--
chr1	27045126	27045186	-	1.24e-05	-0.166229	16	0.66794	0.83417	--	CsaV3_1G042210|	--	--	CsaV3_1G042210|-	--
chr1	27052074	27052152	-	0.0017131	-0.188476	7	0.16324	0.35171	--	--	--	CsaV3_1G042210|	--	--
chr1	27068795	27068881	-	0.0093278	0.184833	14	0.61781	0.43298	--	--	--	--	CsaV3_1G042220|+	--
chr1	27086293	27086396	-	0.00078014	-0.188955	22	0.37305	0.562	--	--	--	--	CsaV3_1G042240|-	CsaV3_1G042230|
chr1	27087281	27087371	-	0.0016479	0.148286	7	0.65214	0.50386	--	--	--	--	CsaV3_1G042240|-	CsaV3_1G042230|
chr1	27126901	27127030	-	0.004711	0.126608	17	0.72255	0.59594	--	--	--	--	CsaV3_1G042270|+	--
chr1	2716641	2716709	-	0.0055802	0.255556	6	0.87406	0.6185	--	--	--	--	CsaV3_1G004340|+	--
chr1	27192590	27192642	-	0.00015725	-0.26759	13	0.32659	0.59418	--	--	--	--	CsaV3_1G042290|-	CsaV3_1G042280|
chr1	27234137	27234249	-	0.0058339	0.22697	11	0.86315	0.63618	--	--	--	--	CsaV3_1G042300|+	--
chr1	27242127	27242217	-	0.0084732	-0.106476	7	0.75067	0.85714	--	--	--	--	CsaV3_1G042300|+	CsaV3_1G042300|
chr1	27247803	27247858	-	0.0086611	0.172278	12	0.64383	0.47156	--	CsaV3_1G042300|	--	--	CsaV3_1G042310|+	--
chr1	27270847	27270906	-	0.025685	-0.103667	15	0.25884	0.36251	--	--	--	--	CsaV3_1G042330|-	CsaV3_1G042320|
chr1	27271390	27271457	-	0.019789	0.14037	9	0.50281	0.36244	--	--	--	--	CsaV3_1G042330|-	CsaV3_1G042320|
chr1	27273083	27273267	-	5.24e-08	0.193821	26	0.719	0.52518	--	--	--	--	CsaV3_1G042330|-	--
chr1	27280162	27280318	-	0.0015226	0.130205	13	0.20246	0.072256	--	--	--	--	CsaV3_1G042340|+	CsaV3_1G042330|
chr1	27304033	27304120	-	0.0006564	0.204815	18	0.89881	0.694	--	CsaV3_1G042370|	--	--	CsaV3_1G042380|+	--
chr1	27341078	27341151	-	0.027466	0.108125	8	0.14008	0.031958	--	--	CsaV3_1G042430.1.exon2	CsaV3_1G042430|	--	CsaV3_1G042420|
chr1	27351303	27351372	-	0.035171	0.108048	7	0.28733	0.17929	--	--	--	--	CsaV3_1G042450|+	--
chr1	27355218	27355309	-	0.0062581	0.128905	14	0.41431	0.2854	--	--	--	--	CsaV3_1G042450|+	--
chr1	27372659	27372730	-	0.00014071	-0.153647	17	0.40984	0.56349	--	CsaV3_1G042460|	--	--	CsaV3_1G042470|+	--
chr1	27373903	27374160	-	0.028653	0.148765	17	0.77273	0.62396	--	--	--	--	CsaV3_1G042470|+	CsaV3_1G042470|
chr1	27382875	27382938	-	9.31e-06	-0.219767	10	0.1414	0.36117	--	--	--	CsaV3_1G042470|	--	--
chr1	27413930	27413988	-	4.7e-05	0.120222	12	0.90886	0.78864	--	--	--	CsaV3_1G042490|	--	--
chr1	27418406	27418572	-	0.025106	-0.151431	17	0.56541	0.71684	--	CsaV3_1G042490|	--	--	CsaV3_1G042500|+	--
chr1	27436419	27436559	-	0.013367	0.220351	19	0.50574	0.28539	--	--	--	--	CsaV3_1G042510|+	--
chr1	27437971	27438059	-	0.01351	-0.208897	13	0.42313	0.63203	--	--	--	--	CsaV3_1G042510|+	--
chr1	27496044	27496096	-	0.00070666	-0.226061	11	0.47679	0.70285	--	--	--	--	CsaV3_1G042560|+	--
chr1	27504855	27504971	-	0.014437	0.121889	12	0.84042	0.71853	--	CsaV3_1G042560|	--	--	CsaV3_1G042570|+	CsaV3_1G042570|
chr1	27510783	27510915	-	0.00049483	-0.123987	25	0.56037	0.68436	--	--	--	--	CsaV3_1G042580|+	--
chr1	27530303	27530415	-	0.039988	0.159444	15	0.42776	0.26831	--	--	--	--	CsaV3_1G042590|+	CsaV3_1G042600|,CsaV3_1G042590|
chr1	27563753	27563884	-	0.0028991	0.227788	11	0.49288	0.26509	--	--	--	--	CsaV3_1G042650|-	CsaV3_1G042640|
chr1	27568019	27568082	-	0.00054247	-0.136308	13	0.57762	0.71392	--	--	--	--	CsaV3_1G042650|-	--
chr1	27582968	27583033	-	0.028466	0.271444	9	0.46033	0.18889	--	--	--	--	CsaV3_1G042650|-	--
chr1	27631417	27631488	-	0.0072665	-0.122044	15	0.15527	0.27731	--	--	--	--	CsaV3_1G042720|+	--
chr1	27631836	27632001	-	0.016478	0.142244	15	0.32809	0.18584	--	--	--	--	CsaV3_1G042720|+	--
chr1	27633628	27633795	-	0.020021	0.142311	15	0.38964	0.24733	--	--	--	--	CsaV3_1G042720|+	CsaV3_1G042720|
chr1	27720227	27720292	-	2.17e-05	-0.110683	21	0.84983	0.96051	--	CsaV3_1G042820|	--	--	CsaV3_1G042830|-	--
chr1	27764094	27764186	-	0.00013632	-0.158119	14	0.19064	0.34876	--	CsaV3_1G042870|,CsaV3_1G042860|	--	--	CsaV3_1G042870|-	--
chr1	27773465	27773528	-	0.024166	0.222667	7	0.6751	0.45243	--	--	--	--	CsaV3_1G042880|+	CsaV3_1G042880|
chr1	27777223	27777324	-	0.018924	0.142833	14	0.3521	0.20926	--	CsaV3_1G042880|	--	--	CsaV3_1G042890|+	CsaV3_1G042890|
chr1	27778189	27778243	-	0.014102	-0.106154	13	0.24462	0.35077	--	--	--	--	CsaV3_1G042890|+	CsaV3_1G042890|
chr1	27805411	27805544	-	0.013914	-0.138451	17	0.68718	0.82563	--	--	--	--	CsaV3_1G042910|-	--
chr1	27810458	27810825	-	0.014433	-0.141086	27	0.32772	0.4688	--	CsaV3_1G042920|	--	--	CsaV3_1G042920|-	CsaV3_1G042910|
chr1	27819885	27820558	-	0.00023336	0.125865	52	0.57258	0.44672	--	--	--	--	CsaV3_1G042930|-	CsaV3_1G042920|
chr1	27892052	27892115	-	0.00065163	0.261939	11	0.88906	0.62712	--	--	--	--	CsaV3_1G043020|+	--
chr1	27892118	27892292	-	2.5e-12	0.150538	31	0.93387	0.78333	--	--	--	--	CsaV3_1G043020|+	--
chr1	27896285	27896381	-	0.018045	0.420944	6	0.80244	0.3815	--	--	--	--	CsaV3_1G043020|+	--
chr1	27915739	27915849	-	0.0015047	0.118	19	0.84404	0.72604	--	CsaV3_1G043030|	--	--	CsaV3_1G043040|-	--
chr1	27963758	27963922	-	0.040817	0.155706	17	0.38112	0.22541	--	--	--	--	CsaV3_1G043070|-	CsaV3_1G043050|
chr1	27964713	27964794	-	0.0044685	0.109708	8	0.48417	0.37446	--	--	--	--	CsaV3_1G043070|-	CsaV3_1G043050|
chr1	27974893	27974996	-	4.01e-05	0.194375	16	0.39035	0.19598	--	--	--	--	CsaV3_1G043080|+	CsaV3_1G043070|
chr1	2799501	2799820	-	0.012593	-0.11156	28	0.2828	0.39436	--	--	--	--	CsaV3_1G004450|+	CsaV3_1G004440|,CsaV3_1G004450|
chr1	28034962	28035052	-	0.0005685	0.138667	12	0.93583	0.79717	--	CsaV3_1G043130|	--	--	CsaV3_1G043130|-	--
chr1	28037623	28037779	-	0.0070392	-0.1673	20	0.51932	0.68662	--	--	--	CsaV3_1G043140|	--	--
chr1	28047401	28047507	-	0.00023207	0.150427	32	0.80361	0.65319	--	--	--	--	CsaV3_1G043150|+	CsaV3_1G043140|
chr1	28064602	28064658	-	0.0025715	-0.169167	10	0.48123	0.6504	--	CsaV3_1G043170|	--	--	CsaV3_1G043170|-	CsaV3_1G043160|
chr1	28064747	28064808	-	0.0018696	0.167037	9	0.38285	0.21581	--	CsaV3_1G043170|	--	--	CsaV3_1G043170|-	CsaV3_1G043160|
chr1	28071754	28071808	-	0.0099016	-0.161667	8	0.28329	0.44496	--	--	--	--	CsaV3_1G043180|+	CsaV3_1G043170|
chr1	28112452	28112578	-	0.039678	0.122941	17	0.55222	0.42927	--	--	--	CsaV3_1G043200|	--	--
chr1	28131249	28131305	-	0.0020458	0.174788	11	0.7643	0.58952	--	--	--	CsaV3_1G043200|	--	--
chr1	28139020	28139122	-	0.047042	0.166229	16	0.5411	0.37487	--	--	--	--	CsaV3_1G043210|-	CsaV3_1G043200|
chr1	28156303	28156406	-	0.00095831	-0.201302	21	0.52505	0.72635	--	--	--	--	CsaV3_1G043220|+	--
chr1	28156679	28156840	-	4.25e-06	0.113129	31	0.77995	0.66682	--	--	--	--	CsaV3_1G043220|+	--
chr1	28159254	28159358	-	7.14e-08	0.199235	17	0.79971	0.60047	--	--	--	--	CsaV3_1G043220|+	--
chr1	28255064	28255221	-	0.0010451	-0.230479	16	0.27148	0.50196	--	CsaV3_1G043300|	--	--	CsaV3_1G043310|-	--
chr1	28265852	28266180	-	4.56e-08	0.137858	47	0.84327	0.70541	--	--	--	--	CsaV3_1G043320|+	--
chr1	28274992	28275089	-	0.00058276	-0.2608	10	0.30707	0.56787	--	CsaV3_1G043320|	--	--	CsaV3_1G043330|-	--
chr1	28311105	28311162	-	9.27e-10	-0.101542	16	0.81687	0.91842	--	--	--	--	CsaV3_1G043350|+	CsaV3_1G043350|
chr1	28326447	28326801	-	0.0037747	0.124747	25	0.57073	0.44599	--	--	--	CsaV3_1G043360|	--	--
chr1	28331169	28331292	-	1.32e-05	-0.174917	24	0.56626	0.74118	--	--	--	--	CsaV3_1G043370|+	--
chr1	28341834	28342028	-	2.2e-08	-0.164605	38	0.73083	0.89544	--	--	--	--	CsaV3_1G043370|+	--
chr1	28367280	28367334	-	0.0060936	0.118615	13	0.82605	0.70744	--	--	--	--	CsaV3_1G043390|-	--
chr1	28373723	28373781	-	0.02262	-0.16125	16	0.57048	0.73173	--	--	--	--	CsaV3_1G043400|+	CsaV3_1G043400|
chr1	28381423	28381513	-	0.047042	0.179389	6	0.3335	0.15411	--	--	--	--	CsaV3_1G043410|+	--
chr1	28387314	28387419	-	0.036074	0.156444	12	0.56242	0.40597	--	--	--	--	CsaV3_1G043410|+	--
chr1	28388714	28388944	-	0.018498	-0.154333	23	0.35867	0.513	--	--	--	--	CsaV3_1G043410|+	--
chr1	2841168	2841266	-	0.00091789	0.117974	13	0.20441	0.086436	--	--	--	--	CsaV3_1G004510|+	CsaV3_1G004510|
chr1	28466861	28466990	-	0.00011243	0.243051	13	0.914	0.67095	--	CsaV3_1G043480|	--	--	CsaV3_1G043480|-	--
chr1	28473533	28473645	-	0.00087275	0.13269	14	0.61319	0.4805	--	--	--	--	CsaV3_1G043490|+	CsaV3_1G043490|
chr1	28508386	28508461	-	2.15e-07	-0.147778	15	0.6224	0.77018	--	--	--	--	CsaV3_1G043530|+	--
chr1	28561019	28561137	-	1.49e-06	0.208846	13	0.42372	0.21487	--	--	--	--	CsaV3_1G043570|+	CsaV3_1G043560|
chr1	28573364	28573507	-	0.019846	-0.126333	13	0.75551	0.88185	--	CsaV3_1G043590|	--	--	CsaV3_1G043600|+	--
chr1	28596698	28596790	-	1.96e-09	0.151012	27	0.88159	0.73058	--	--	--	CsaV3_1G043610|	--	--
chr1	28625890	28625948	-	4.92e-13	0.136762	21	0.92965	0.79289	--	--	--	--	CsaV3_1G043650|-	CsaV3_1G043640|
chr1	28639151	28639216	-	0.011321	-0.147967	10	0.5114	0.65937	--	--	--	--	CsaV3_1G043650|-	--
chr1	28639435	28639501	-	0.028466	0.125481	9	0.48074	0.35526	--	--	--	--	CsaV3_1G043650|-	--
chr1	28659425	28659543	-	0.0014761	0.181974	13	0.41779	0.23582	--	--	--	--	CsaV3_1G043660|+	CsaV3_1G043650|
chr1	28664482	28664582	-	0.035517	0.1608	15	0.82284	0.66204	--	--	--	--	CsaV3_1G043660|+	--
chr1	2873465	2873539	-	0.00012461	0.1773	10	0.30657	0.12927	--	CsaV3_1G004540|	--	--	CsaV3_1G004550|+	--
chr1	2875014	2875082	-	5.77e-06	0.226515	11	0.57327	0.34676	--	CsaV3_1G004540|	--	--	CsaV3_1G004550|+	--
chr1	28794675	28794738	-	0.0087146	-0.243571	7	0.52019	0.76376	--	--	--	--	CsaV3_1G043780|-	--
chr1	28832644	28832790	-	1.49e-06	0.196821	13	0.60041	0.40359	--	--	--	--	CsaV3_1G043800|+	--
chr1	28851406	28851706	-	0.021071	-0.122924	35	0.50624	0.62916	--	--	--	--	CsaV3_1G043800|+	--
chr1	28856065	28856300	-	0.033664	-0.137955	37	0.45194	0.58989	--	CsaV3_1G043800|	--	--	CsaV3_1G043810|-	--
chr1	28857626	28857733	-	0.00429	0.178688	16	0.50931	0.33063	--	--	--	--	CsaV3_1G043810|-	--
chr1	28858559	28858658	-	0.0039637	-0.122937	21	0.70846	0.8314	--	--	--	--	CsaV3_1G043810|-	--
chr1	28940918	28941075	-	0.028466	0.159702	19	0.42307	0.26337	--	--	--	--	CsaV3_1G043850|+	--
chr1	28951202	28951367	-	0.0071124	0.175137	17	0.71937	0.54424	--	--	--	--	CsaV3_1G043850|+	--
chr1	28983055	28983252	-	9.5e-07	0.197294	17	0.8629	0.66561	--	--	--	--	CsaV3_1G043850|+	--
chr1	28990165	28990268	-	0.0010097	0.205771	16	0.62908	0.42331	--	--	--	--	CsaV3_1G043850|+	--
chr1	28990912	28990985	-	0.038511	0.122385	13	0.77279	0.65041	--	--	--	--	CsaV3_1G043850|+	--
chr1	28991318	28991458	-	6.73e-08	0.167385	32	0.89799	0.7306	--	--	--	--	CsaV3_1G043850|+	--
chr1	29038625	29038772	-	0.00047931	0.189167	16	0.69935	0.51019	--	--	--	--	CsaV3_1G043890|+	CsaV3_1G043880|
chr1	29040197	29040262	-	0.020014	-0.139593	9	0.38007	0.51967	--	--	--	--	CsaV3_1G043890|+	--
chr1	29041510	29041696	-	0.00019842	0.223222	12	0.45422	0.231	--	--	--	--	CsaV3_1G043890|+	CsaV3_1G043890|
chr1	29057634	29057696	-	4.19e-11	-0.176389	18	0.7993	0.97569	--	--	--	--	CsaV3_1G043920|+	CsaV3_1G043900|
chr1	29127479	29127552	-	0.0088257	-0.218762	7	0.37052	0.58929	--	--	--	--	CsaV3_1G043970|-	--
chr1	29145692	29146041	-	0.00072864	-0.129712	22	0.33308	0.46279	--	--	--	--	CsaV3_1G043990|+	CsaV3_1G043980|
chr1	29159429	29159504	-	6.6e-05	-0.23937	9	0.51163	0.751	--	--	--	--	CsaV3_1G044010|-	CsaV3_1G044000|
chr1	29189104	29189165	-	7.21e-05	0.151111	9	0.28259	0.13148	--	CsaV3_1G044030|	--	--	CsaV3_1G044040|+	--
chr1	29192441	29192528	-	0.00017101	0.210788	11	0.60052	0.38973	--	--	--	--	CsaV3_1G044040|+	--
chr1	29226147	29226696	-	9.26e-05	0.170379	29	0.64978	0.4794	--	--	--	--	CsaV3_1G044060|+	--
chr1	29230160	29230249	-	0.0021791	0.187417	12	0.57867	0.39125	--	--	--	--	CsaV3_1G044060|+	--
chr1	29235566	29235660	-	0.00031585	0.168511	15	0.945	0.77649	--	--	--	CsaV3_1G044060|	--	--
chr1	29259564	29259639	-	9.06e-05	0.121821	13	0.96105	0.83923	--	--	--	CsaV3_1G044070|	--	--
chr1	29266600	29266837	-	5e-06	0.199756	15	0.88902	0.68927	--	--	--	--	CsaV3_1G044080|+	--
chr1	29346759	29346888	-	1.96e-05	0.191181	24	0.69447	0.50329	--	--	--	--	CsaV3_1G044120|-	--
chr1	29387169	29387288	-	0.00010007	0.247939	11	0.81748	0.56955	--	--	--	--	CsaV3_1G044170|+	--
chr1	2941192	2941329	-	0.00072402	-0.123938	16	0.065896	0.18983	--	CsaV3_1G004640|	--	--	CsaV3_1G004650|+	--
chr1	29424691	29424770	-	0.028159	-0.155667	12	0.69953	0.85519	--	CsaV3_1G044170|	--	--	CsaV3_1G044180|+	--
chr1	29433381	29433461	-	0.0026927	-0.195967	10	0.18383	0.3798	--	CsaV3_1G044180|	--	--	CsaV3_1G044190|+	--
chr1	29442407	29442481	-	0.0047168	-0.124825	21	0.47202	0.59684	--	CsaV3_1G044190|	--	--	CsaV3_1G044200|-	--
chr1	29451310	29451395	-	0.014516	0.190394	11	0.55509	0.3647	--	--	--	CsaV3_1G044210|	--	--
chr1	29454235	29454355	-	3.27e-05	0.298167	8	0.48017	0.182	--	--	--	--	CsaV3_1G044220|-	CsaV3_1G044210|
chr1	29558666	29558761	-	3.58e-07	-0.130278	24	0.69914	0.82942	--	--	--	--	CsaV3_1G044290|+	CsaV3_1G044300|,CsaV3_1G044290|
chr1	29580772	29580860	-	0.013179	0.13563	9	0.15504	0.019407	--	CsaV3_1G044320|	--	--	CsaV3_1G044330|-	--
chr1	29585721	29585802	-	0.00012359	0.155222	15	0.89444	0.73922	--	--	--	--	CsaV3_1G044330|-	--
chr1	29725243	29725301	-	0.0025925	0.197542	8	0.66854	0.471	--	CsaV3_1G044360|	--	--	CsaV3_1G044380|+	--
chr1	29727614	29727729	-	0.0012366	0.197593	9	0.42356	0.22596	--	--	--	--	CsaV3_1G044380|+	CsaV3_1G044380|
chr1	29794574	29794624	-	0.0059972	-0.172933	10	0.092	0.26493	--	--	--	--	CsaV3_1G044450|+	CsaV3_1G044450|
chr1	29821686	29821784	-	0.00018613	0.256544	19	0.66544	0.40889	--	--	--	CsaV3_1G044460|	--	--
chr1	29863158	29863246	-	0.0030935	0.211044	15	0.87667	0.66562	--	--	--	--	CsaV3_1G044490|-	--
chr1	29878428	29878832	-	4.65e-05	0.116017	20	0.25377	0.13775	--	--	--	--	CsaV3_1G044500|+	--
chr1	29893378	29893494	-	0.020245	-0.153359	13	0.1801	0.33346	--	--	--	--	CsaV3_1G044510|+	--
chr1	29974549	29974620	-	0.0087532	-0.163095	7	0.13795	0.30105	--	--	--	--	CsaV3_1G044580|+	--
chr1	29975782	29975860	-	0.00011866	0.135433	10	0.47657	0.34113	--	--	--	--	CsaV3_1G044580|+	--
chr1	29977717	29977825	-	0.0090042	0.102303	11	0.89588	0.79358	--	--	--	--	CsaV3_1G044580|+	--
chr1	30026126	30026183	-	0.039409	-0.104633	10	0.57907	0.6837	--	--	--	--	CsaV3_1G044620|+	CsaV3_1G044610|
chr1	30068087	30068210	-	0.0033566	0.163738	14	0.78264	0.6189	--	CsaV3_1G044650|,CsaV3_1G044640|	--	--	CsaV3_1G044650|-	--
chr1	30091002	30091115	-	3.86e-05	-0.113833	10	0.080167	0.194	--	CsaV3_1G044670|	--	--	CsaV3_1G044680|-	CsaV3_1G044660|
chr1	30105477	30105539	-	0.0028557	-0.177952	7	0.16371	0.34167	--	--	--	--	CsaV3_1G044700|+	CsaV3_1G044700|
chr1	30105564	30105620	-	2.99e-05	-0.117033	10	0.257	0.37403	--	--	--	--	CsaV3_1G044700|+	CsaV3_1G044700|
chr1	30106150	30106216	-	0.040509	-0.117167	8	0.041417	0.15858	--	--	--	--	CsaV3_1G044700|+	CsaV3_1G044700|
chr1	30119185	30119250	-	0.037659	0.2275	8	0.36338	0.13587	--	--	--	--	CsaV3_1G044710|+	CsaV3_1G044710|
chr1	30183061	30183392	-	0.026845	-0.204583	8	0.592	0.79658	--	--	--	--	CsaV3_1G044780|+	--
chr1	30189042	30189175	-	5.9e-06	-0.175608	17	0.69112	0.86673	--	CsaV3_1G044780|	--	--	CsaV3_1G044790|-	--
chr1	30245254	30245393	-	0.005443	-0.134479	16	0.3894	0.52387	--	--	--	--	CsaV3_1G044800|-	--
chr1	30327567	30327660	-	0.0008263	-0.1	8	0.048208	0.14821	--	--	--	--	CsaV3_1G044870|+	--
chr1	30342154	30342279	-	0.0060121	0.154205	13	0.78531	0.6311	--	--	--	--	CsaV3_1G044880|+	CsaV3_1G044880|
chr1	30342328	30342450	-	6.08e-10	-0.109316	19	0.87261	0.98193	--	--	--	--	CsaV3_1G044880|+	CsaV3_1G044880|
chr1	30344892	30345001	-	0.00062404	-0.171917	12	0.38858	0.5605	--	CsaV3_1G044880|	--	--	CsaV3_1G044890|-	--
chr1	30355008	30355233	-	3.83e-06	0.171101	23	0.78497	0.61387	--	--	--	--	CsaV3_1G044900|+	CsaV3_1G044890|,CsaV3_1G044900|
chr1	30356975	30357070	-	0.00078064	-0.222056	12	0.6505	0.87256	--	--	--	CsaV3_1G044900|	--	--
chr1	30359313	30359386	-	0.028815	-0.115333	11	0.47552	0.59085	--	CsaV3_1G044900|	--	--	CsaV3_1G044910|+	CsaV3_1G044910|
chr1	30360021	30360093	-	0.011319	0.208375	8	0.77575	0.56737	--	--	--	--	CsaV3_1G044910|+	CsaV3_1G044910|
chr1	30419330	30419389	-	0.0044072	0.169375	8	0.27013	0.10075	--	--	--	--	CsaV3_1G044940|+	CsaV3_1G044940|
chr1	30539320	30539527	-	0.0071511	0.114197	22	0.33108	0.21688	--	--	--	--	CsaV3_1G045010|+	CsaV3_1G045010|
chr1	30559171	30559248	-	0.005335	-0.145481	9	0.1983	0.34378	--	--	--	--	CsaV3_1G045020|+	CsaV3_1G045020|
chr1	30587004	30587056	-	0.024166	0.144143	7	0.78919	0.64505	--	--	--	--	CsaV3_1G045030|-	--
chr1	30631456	30631780	-	0.027466	-0.142028	12	0.41833	0.56036	--	--	--	--	CsaV3_1G045060|-	--
chr1	30642115	30642201	-	0.028205	0.15825	12	0.30419	0.14594	--	--	--	--	CsaV3_1G045060|-	--
chr1	30676088	30676283	-	0.0016132	-0.199	24	0.49501	0.69401	--	--	--	--	CsaV3_1G045080|+	CsaV3_1G045080|
chr1	30697710	30697800	-	0.006771	0.212083	8	0.32325	0.11117	--	--	--	--	CsaV3_1G045120|+	CsaV3_1G045120|
chr1	30742940	30742993	-	0.047042	0.170278	6	0.46633	0.29606	--	--	--	--	CsaV3_1G045160|+	--
chr1	30828540	30828594	-	0.027466	-0.156625	8	0.83642	0.99304	--	--	--	CsaV3_1G045170|	--	--
chr1	30850258	30850381	-	0.000279	-0.123783	23	0.7898	0.91358	--	--	--	--	CsaV3_1G045180|+	--
chr1	30895174	30895228	-	0.0032151	-0.152	6	0.019056	0.17106	--	--	--	--	CsaV3_1G045210|+	--
chr1	30897134	30897226	-	8.48e-07	-0.168208	24	0.77697	0.94518	--	--	--	--	CsaV3_1G045210|+	--
chr1	309017	309069	-	0.018045	0.195389	6	0.39844	0.20306	--	CsaV3_1G000550|	--	--	CsaV3_1G000550|-	CsaV3_1G000560|
chr1	30920745	30920949	-	0.0047397	-0.201356	15	0.48311	0.68447	--	--	--	--	CsaV3_1G045230|+	CsaV3_1G045230|
chr1	309221	309359	-	0.0055802	-0.132833	16	0.72267	0.8555	--	CsaV3_1G000550|	--	--	CsaV3_1G000550|-	CsaV3_1G000560|
chr1	30927614	30927679	-	8.8e-07	0.229278	12	0.54989	0.32061	--	--	--	--	CsaV3_1G045240|-	--
chr1	30941035	30941160	-	0.00029607	0.272262	14	0.64381	0.37155	--	--	--	--	CsaV3_1G045250|-	CsaV3_1G045240|
chr1	30942424	30942531	-	0.0030474	0.184889	12	0.71603	0.53114	--	--	--	--	CsaV3_1G045250|-	--
chr1	30942531	30942588	-	5.28e-05	0.162485	11	0.26527	0.10279	--	--	--	--	CsaV3_1G045250|-	--
chr1	31145769	31145862	-	0.027496	0.145267	10	0.84297	0.6977	--	--	--	--	CsaV3_1G045360|+	CsaV3_1G045360|
chr1	31156262	31156327	-	0.0086979	-0.16625	12	0.34656	0.51281	--	--	--	--	CsaV3_1G045380|-	--
chr1	31185909	31186001	-	6.62e-08	0.100267	20	0.98703	0.88677	--	--	--	--	CsaV3_1G045400|-	--
chr1	31222635	31222761	-	0.018901	0.2245	14	0.69117	0.46667	--	CsaV3_1G045430|	--	--	CsaV3_1G045430|-	--
chr1	31316698	31316817	-	0.010827	0.155333	5	0.21493	0.0596	--	--	--	--	CsaV3_1G045520|+	--
chr1	31329422	31329608	-	0.0043136	0.192879	11	0.54679	0.35391	--	--	--	--	CsaV3_1G045520|+	CsaV3_1G045520|
chr1	31389453	31389559	-	0.012268	-0.144311	15	0.10042	0.24473	--	--	--	--	CsaV3_1G045580|+	--
chr1	31391354	31391750	-	2.11e-06	0.163476	35	0.7977	0.63423	--	--	--	--	CsaV3_1G045580|+	CsaV3_1G045580|
chr1	31407118	31407266	-	0.010367	0.237611	6	0.82989	0.59228	--	--	--	--	CsaV3_1G045590|+	CsaV3_1G045590|
chr1	31477717	31477767	-	0.0085583	0.137758	11	0.69679	0.55903	--	--	--	--	CsaV3_1G045650|+	--
chr1	31480551	31480651	-	0.038011	-0.137056	12	0.53056	0.66761	--	--	--	--	CsaV3_1G045650|+	--
chr1	31498931	31499110	-	0.019603	0.113129	31	0.61537	0.50224	--	--	CsaV3_1G045650.1.exon14	CsaV3_1G045650|	--	--
chr1	31568306	31568379	-	8.49e-07	-0.173646	16	0.46596	0.6396	--	CsaV3_1G045730|	--	--	CsaV3_1G045730|-	--
chr1	31647377	31647458	-	0.0012938	0.248148	9	0.8897	0.64156	--	--	--	--	CsaV3_1G045830|-	--
chr1	31653188	31653240	-	0.00012681	0.133167	14	0.86005	0.72688	--	--	--	CsaV3_1G045830|	--	--
chr1	31653684	31653817	-	0.00022226	0.105604	16	0.18723	0.081625	--	--	--	CsaV3_1G045830|	--	--
chr1	31666522	31666572	-	0.035322	0.209857	7	0.48457	0.27471	--	--	--	--	CsaV3_1G045840|-	--
chr1	31671844	31671926	-	0.042945	-0.120229	16	0.72246	0.84269	--	--	--	--	CsaV3_1G045840|-	--
chr1	31735614	31735682	-	0.018045	0.160444	6	0.8175	0.65706	--	--	--	CsaV3_1G045890|	--	--
chr1	31736525	31736615	-	0.00097072	-0.1311	10	0.4496	0.5807	--	CsaV3_1G045900|	--	CsaV3_1G045890|	--	--
chr1	31757008	31757108	-	0.0099443	0.144333	11	0.41864	0.2743	--	--	CsaV3_1G045920.1.exon1	CsaV3_1G045920|,CsaV3_1G045890|	--	--
chr1	31769277	31769345	-	0.03443	-0.223722	12	0.29147	0.51519	--	CsaV3_1G045890|	--	--	CsaV3_1G045940|+	--
chr1	31805845	31805993	-	0.018045	-0.112	14	0.71474	0.82674	--	CsaV3_1G045980|,CsaV3_1G045960|	--	--	CsaV3_1G045970|+	CsaV3_1G045990|,CsaV3_1G045970|
chr1	31855288	31855345	-	0.029011	0.101333	15	0.43289	0.33156	CsaV3_1G046060.1.cds3	--	CsaV3_1G046060.1.exon3	CsaV3_1G046060|	--	--
chr1	31887221	31887339	-	0.012227	0.201111	15	0.70667	0.50556	--	--	--	CsaV3_1G046090|	--	--
chr1	31902040	31902171	-	9.58e-06	-0.188048	28	0.45739	0.64544	--	--	--	--	CsaV3_1G046110|-	CsaV3_1G046100|
chr1	31911521	31911575	-	1.32e-06	-0.127137	17	0.77833	0.90547	--	--	CsaV3_1G046110.1.exon1	CsaV3_1G046110|	--	--
chr1	31919369	31919505	-	0.0044606	0.384167	8	0.66696	0.28279	--	--	--	--	CsaV3_1G046120|+	--
chr1	31940452	31940502	-	0.0044497	-0.205958	8	0.59212	0.79808	--	--	--	--	CsaV3_1G046130|+	--
chr1	32076484	32076552	-	0.047042	0.264278	6	0.55767	0.29339	--	--	--	--	CsaV3_1G046260|-	CsaV3_1G046250|
chr1	32123436	32123497	-	0.0030623	0.238952	7	0.78814	0.54919	--	--	--	--	CsaV3_1G046300|+	CsaV3_1G046300|,CsaV3_1G046290|
chr1	32143337	32143453	-	0.011245	-0.133852	18	0.73733	0.87119	--	CsaV3_1G046320|	--	--	CsaV3_1G046330|-	--
chr1	32160427	32160674	-	8.82e-05	0.14238	36	0.61384	0.47146	--	--	--	--	CsaV3_1G046350|+	--
chr1	32196392	32196444	-	0.0053197	0.207741	9	0.63196	0.42422	--	--	--	--	CsaV3_1G046400|-	--
chr1	32197743	32197854	-	0.00073426	0.167729	16	0.63075	0.46302	--	--	--	--	CsaV3_1G046400|-	--
chr1	32368132	32368209	-	0.00098548	-0.174063	16	0.56569	0.73975	--	--	--	--	CsaV3_1G046520|-	--
chr1	32377903	32378006	-	0.021259	-0.149458	16	0.21652	0.36598	--	--	--	--	CsaV3_1G046520|-	--
chr1	32385480	32385530	-	0.0084227	0.255074	9	0.56033	0.30526	--	--	--	--	CsaV3_1G046530|-	CsaV3_1G046520|
chr1	32401101	32401195	-	1.29e-05	-0.128198	27	0.80393	0.93212	--	--	--	--	CsaV3_1G046530|-	--
chr1	32446504	32446563	-	1.07e-07	-0.108222	15	0.85091	0.95913	--	--	--	--	CsaV3_1G046540|-	--
chr1	32468687	32468814	-	7.25e-07	0.133907	18	0.94776	0.81385	--	--	--	--	CsaV3_1G046550|-	CsaV3_1G046540|
chr1	32468817	32469009	-	1.79e-05	0.19	23	0.64272	0.45272	--	--	--	--	CsaV3_1G046550|-	CsaV3_1G046540|
chr1	32551870	32551964	-	0.009225	0.213733	10	0.60197	0.38823	--	--	--	--	CsaV3_1G046610|+	--
chr1	32554609	32554932	-	0.0013177	0.127573	32	0.71499	0.58742	--	--	--	--	CsaV3_1G046610|+	--
chr1	32555323	32555534	-	0.00062261	-0.250877	19	0.44816	0.69904	--	--	--	--	CsaV3_1G046610|+	--
chr1	32556057	32556467	-	0.0062586	0.120512	41	0.6432	0.52268	--	--	--	--	CsaV3_1G046610|+	--
chr1	32576845	32576972	-	1.48e-09	-0.164811	30	0.75677	0.92158	--	--	--	--	CsaV3_1G046620|+	--
chr1	32581385	32581461	-	2.25e-05	-0.257111	12	0.68208	0.93919	--	--	--	--	CsaV3_1G046620|+	--
chr1	32582564	32582624	-	0.0064635	0.121848	11	0.55691	0.43506	--	--	--	--	CsaV3_1G046620|+	--
chr1	32590421	32590496	-	7.69e-09	0.128569	17	0.98775	0.85918	--	--	--	--	CsaV3_1G046630|+	--
chr1	32599405	32599566	-	1.3e-09	0.175364	22	0.93842	0.76306	--	--	--	--	CsaV3_1G046640|-	--
chr1	32600321	32600384	-	0.00031731	-0.113556	15	0.78456	0.89811	--	--	--	--	CsaV3_1G046640|-	--
chr1	32629076	32629193	-	0.018571	-0.119431	17	0.77096	0.89039	--	--	--	--	CsaV3_1G046650|+	CsaV3_1G046650|
chr1	32642586	32642761	-	0.021278	0.150986	24	0.59343	0.44244	--	--	--	--	CsaV3_1G046660|+	--
chr1	32660486	32660592	-	0.00093503	-0.133741	18	0.37393	0.50767	--	CsaV3_1G046660|	--	CsaV3_1G046670|	--	--
chr1	32712109	32712194	-	0.0044851	0.289542	8	0.64125	0.35171	--	CsaV3_1G046710|	--	--	CsaV3_1G046710|-	CsaV3_1G046700|
chr1	32802752	32802858	-	5.58e-07	0.144029	23	0.9403	0.79628	--	--	--	--	--	--
chr1	3448537	3448645	-	0.0026944	0.173433	10	0.9012	0.72777	--	--	--	--	CsaV3_1G005190|+	CsaV3_1G005190|
chr1	3468925	3469029	-	0.039217	0.148182	11	0.28655	0.13836	--	--	--	--	CsaV3_1G005240|-	--
chr1	3478080	3478213	-	0.028425	0.130185	9	0.30811	0.17793	--	--	--	--	CsaV3_1G005250|-	--
chr1	3495196	3495540	-	5.76e-05	0.11	21	0.88919	0.77919	--	--	--	--	CsaV3_1G005280|+	CsaV3_1G005280|
chr1	353816	353981	-	0.0031191	0.169542	16	0.89533	0.72579	--	CsaV3_1G000610|	--	--	CsaV3_1G000620|+	CsaV3_1G000600|,CsaV3_1G000620|
chr1	3606079	3606254	-	3.05e-05	0.119229	16	0.93854	0.81931	--	--	CsaV3_1G005540.1.exon1	CsaV3_1G005540|	--	--
chr1	3612031	3612081	-	2.03e-07	-0.261639	12	0.27967	0.54131	--	--	--	--	CsaV3_1G005550|+	--
chr1	3612468	3612619	-	0.0057436	0.161474	19	0.73512	0.57365	--	--	--	--	CsaV3_1G005550|+	--
chr1	3634847	3634915	-	0.027466	-0.146481	9	0.62722	0.7737	--	--	--	--	CsaV3_1G005620|+	CsaV3_1G005620|
chr1	3642507	3642589	-	0.027466	0.186051	13	0.66903	0.48297	--	CsaV3_1G005630|	--	--	CsaV3_1G005640|+	CsaV3_1G005640|
chr1	3647041	3647126	-	0.0019017	0.203963	9	0.41456	0.21059	--	CsaV3_1G005640|,CsaV3_1G005650|	--	--	CsaV3_1G005650|-	--
chr1	366482	366610	-	0.034739	0.147769	13	0.67572	0.52795	--	CsaV3_1G000630|	--	--	CsaV3_1G000640|+	CsaV3_1G000640|
chr1	3680983	3681042	-	0.0088408	0.226867	10	0.77813	0.55127	--	CsaV3_1G005720|	--	--	CsaV3_1G005720|-	CsaV3_1G005710|
chr1	3706634	3706725	-	0.0042279	0.158233	20	0.7517	0.59347	--	--	--	--	CsaV3_1G005770|+	CsaV3_1G005770|
chr1	3741169	3741309	-	2.14e-13	0.156694	24	0.45682	0.30012	--	CsaV3_1G005860|	--	--	CsaV3_1G005860|-	CsaV3_1G005840|,CsaV3_1G005850|
chr1	3787466	3787550	-	6.86e-06	0.178882	17	0.29524	0.11635	--	--	--	CsaV3_1G005900|	--	--
chr1	406735	406910	-	0.0097368	0.118955	22	0.22589	0.10694	--	--	--	--	CsaV3_1G000680|+	CsaV3_1G000680|
chr1	4078410	4078470	-	2.5e-05	-0.201271	16	0.60169	0.80296	--	--	--	--	CsaV3_1G006400|+	--
chr1	4080258	4080407	-	0.00046252	-0.248286	14	0.42764	0.67593	--	--	--	--	CsaV3_1G006400|+	--
chr1	4170778	4170842	-	0.0046558	-0.207273	11	0.22424	0.43152	--	--	--	--	CsaV3_1G006510|+	CsaV3_1G006500|
chr1	4171088	4171190	-	0.027466	-0.124042	16	0.42119	0.54523	--	--	--	--	CsaV3_1G006510|+	CsaV3_1G006500|
chr1	4171504	4171764	-	0.027466	0.131179	13	0.36836	0.23718	--	--	--	--	CsaV3_1G006510|+	CsaV3_1G006510|
chr1	4172523	4172758	-	0.044779	-0.103725	17	0.215	0.31873	--	--	--	--	CsaV3_1G006510|+	CsaV3_1G006510|
chr1	4187356	4187420	-	0.0012219	0.127273	11	0.32348	0.19621	--	CsaV3_1G006530|	--	--	CsaV3_1G006530|-	--
chr1	4193201	4193442	-	0.0047445	0.117556	27	0.71274	0.59519	--	CsaV3_1G006540|	--	--	CsaV3_1G006540|-	CsaV3_1G006530|
chr1	4216936	4217032	-	3.52e-07	0.255549	17	0.67571	0.42016	--	--	--	--	CsaV3_1G006570|-	--
chr1	4233045	4233178	-	2.25e-05	-0.199282	13	0.36772	0.567	--	--	--	--	CsaV3_1G006580|-	--
chr1	4244960	4245306	-	1.52e-10	-0.222118	17	0.71827	0.94039	--	--	--	--	CsaV3_1G006590|+	CsaV3_1G006590|,CsaV3_1G006600|
chr1	4249496	4249564	-	0.00067149	0.269455	11	0.40379	0.13433	--	CsaV3_1G006610|,CsaV3_1G006600|	--	--	CsaV3_1G006620|-	--
chr1	4251684	4251950	-	0.00091962	-0.142667	20	0.59775	0.74042	--	CsaV3_1G006620|	--	--	CsaV3_1G006620|-	--
chr1	4374882	4374947	-	0.00096208	-0.181056	18	0.3658	0.54685	--	--	--	CsaV3_1G006880|	--	--
chr1	4389365	4389424	-	6.5e-05	-0.256444	9	0.504	0.76044	--	--	--	CsaV3_1G006910|	--	--
chr1	4399849	4399913	-	0.010827	0.312467	5	0.45527	0.1428	--	--	--	--	CsaV3_1G006940|+	--
chr1	4465975	4466058	-	0.047868	0.149121	11	0.25558	0.10645	--	--	--	--	CsaV3_1G007050|-	CsaV3_1G007040|
chr1	4481185	4481286	-	0.002289	0.183333	14	0.53293	0.3496	--	--	--	--	CsaV3_1G007070|+	--
chr1	4481367	4481449	-	0.00010023	-0.203533	15	0.28133	0.48487	--	--	--	--	CsaV3_1G007070|+	--
chr1	4482600	4482660	-	0.033479	0.147867	5	0.92793	0.78007	--	--	--	--	CsaV3_1G007070|+	--
chr1	4539709	4539777	-	0.0014089	0.257067	10	0.69593	0.43887	--	--	--	--	CsaV3_1G007160|-	--
chr1	4550729	4550841	-	0.028487	-0.1933	10	0.15913	0.35243	--	--	--	--	CsaV3_1G007170|+	--
chr1	4581933	4582108	-	0.00041212	-0.137222	21	0.6309	0.76813	--	CsaV3_1G007230|	--	--	CsaV3_1G007230|-	CsaV3_1G007220|
chr1	4599652	4599815	-	0.019017	-0.153059	17	0.23335	0.38641	--	--	--	--	CsaV3_1G007270|-	--
chr1	4604050	4604137	-	0.035121	0.199905	7	0.95605	0.75614	--	CsaV3_1G007270|	--	--	CsaV3_1G007270|-	CsaV3_1G007280|
chr1	4610573	4610662	-	0.0022734	0.1493	10	0.27647	0.12717	--	--	--	--	CsaV3_1G007290|-	CsaV3_1G007270|
chr1	4612808	4612928	-	0.0022811	-0.112289	15	0.094289	0.20658	--	CsaV3_1G007290|	--	--	CsaV3_1G007290|-	--
chr1	4623796	4623849	-	1.57e-08	-0.197489	15	0.70531	0.9028	--	CsaV3_1G007300|	--	--	CsaV3_1G007310|+	--
chr1	4688962	4689086	-	0.00030198	-0.128018	19	0.53425	0.66226	--	--	--	--	CsaV3_1G007400|-	--
chr1	4712645	4712716	-	0.00026592	-0.138625	8	0.15879	0.29742	--	--	--	--	CsaV3_1G007420|+	CsaV3_1G007420|
chr1	4779569	4779679	-	9.58e-06	0.154712	22	0.43468	0.27997	--	--	--	--	CsaV3_1G007520|+	CsaV3_1G007520|
chr1	4806974	4807093	-	0.026252	0.259487	13	0.47315	0.21367	--	--	--	--	CsaV3_1G007560|+	CsaV3_1G007560|,CsaV3_1G007550|
chr1	4815517	4815731	-	0.0022999	0.202965	19	0.60782	0.40486	--	CsaV3_1G007580|	--	--	CsaV3_1G007580|-	CsaV3_1G007570|
chr1	4822507	4822585	-	2.58e-06	-0.298833	12	0.14975	0.44858	--	--	--	--	CsaV3_1G007590|+	CsaV3_1G007580|
chr1	484129	484272	-	0.005253	-0.217185	9	0.18126	0.39844	--	--	--	--	CsaV3_1G000770|+	CsaV3_1G000770|,CsaV3_1G000760|
chr1	4885529	4885581	-	0.00012396	0.235367	10	0.9405	0.70513	--	--	--	--	CsaV3_1G007700|+	CsaV3_1G007690|
chr1	4888387	4888511	-	2.46e-05	0.140967	30	0.61824	0.47728	--	--	--	--	CsaV3_1G007700|+	--
chr1	4892517	4892597	-	0.0030294	0.114444	12	0.49586	0.38142	--	--	--	--	CsaV3_1G007700|+	--
chr1	4893116	4893196	-	0.0021536	0.18263	9	0.91452	0.73189	--	--	--	--	CsaV3_1G007700|+	--
chr1	48958	49043	-	0.0055802	0.179	15	0.44273	0.26373	--	--	--	--	CsaV3_1G000050|+	CsaV3_1G000050|,CsaV3_1G000040|
chr1	4908221	4908302	-	0.028466	0.174556	6	0.681	0.50644	--	--	--	--	CsaV3_1G007730|+	CsaV3_1G007730|
chr1	4929321	4929430	-	0.0015347	0.218125	8	0.59467	0.37654	--	--	--	--	CsaV3_1G007770|+	CsaV3_1G007770|
chr1	4948293	4948499	-	0.0096627	-0.107528	24	0.39547	0.503	--	--	--	--	CsaV3_1G007820|+	CsaV3_1G007820|
chr1	5050760	5050850	-	0.0047397	0.17381	14	0.83793	0.66412	--	--	--	--	CsaV3_1G007990|-	--
chr1	5052007	5052105	-	0.0083531	0.135854	16	0.45077	0.31492	--	--	--	--	CsaV3_1G007990|-	--
chr1	5069169	5069584	-	0.012242	-0.103347	24	0.79414	0.89749	--	--	--	--	CsaV3_1G008010|+	--
chr1	5122959	5123010	-	0.028466	0.158	6	0.24978	0.091778	--	--	--	--	CsaV3_1G008120|-	CsaV3_1G008110|
chr1	516889	517058	-	0.0020638	-0.158686	17	0.25488	0.41357	--	--	--	--	CsaV3_1G000830|+	CsaV3_1G000830|,CsaV3_1G000820|
chr1	5202478	5202643	-	0.0063681	-0.192303	11	0.30767	0.49997	--	CsaV3_1G008240|	--	--	CsaV3_1G008250|+	--
chr1	5224647	5224715	-	0.0067391	-0.232417	12	0.41806	0.65047	--	--	--	--	CsaV3_1G008290|+	CsaV3_1G008290|
chr1	5287161	5287215	-	0.028761	0.178033	10	0.5753	0.39727	--	CsaV3_1G008430|	--	--	CsaV3_1G008440|+	--
chr1	5298010	5298111	-	0.0010565	0.167958	24	0.69282	0.52486	--	CsaV3_1G008450|	--	--	CsaV3_1G008460|-	--
chr1	5315972	5316143	-	1.61e-17	-0.14913	54	0.74798	0.89711	--	--	--	--	CsaV3_1G008490|+	CsaV3_1G008490|
chr1	536370	536455	-	4.07e-06	-0.101211	19	0.84289	0.94411	--	--	--	--	CsaV3_1G000890|+	CsaV3_1G000880|
chr1	548465	548546	-	0.037697	0.110833	10	0.17523	0.0644	--	CsaV3_1G000900|	--	--	CsaV3_1G000920|-	CsaV3_1G000910|
chr1	5485878	5485937	-	3.25e-07	-0.13813	18	0.72024	0.85837	--	CsaV3_1G008780|	--	--	CsaV3_1G008790|-	--
chr1	5487078	5487128	-	0.0051545	0.145333	7	0.24976	0.10443	--	CsaV3_1G008780|	--	--	CsaV3_1G008790|-	--
chr1	550175	550304	-	0.017889	0.180956	15	0.84356	0.6626	--	CsaV3_1G000920|	--	--	CsaV3_1G000920|-	--
chr1	5539033	5539142	-	0.0336	0.2176	5	0.43107	0.21347	--	--	--	--	CsaV3_1G008910|+	--
chr1	5576107	5576175	-	1.3e-05	-0.101208	16	0.74754	0.84875	--	--	--	--	CsaV3_1G008970|+	--
chr1	5647098	5647207	-	0.027466	0.118667	8	0.94292	0.82425	--	--	--	--	CsaV3_1G009070|+	CsaV3_1G009070|
chr1	5707578	5707682	-	9.09e-05	0.112792	16	0.75204	0.63925	--	--	--	--	CsaV3_1G009140|+	CsaV3_1G009140|
chr1	5715913	5716036	-	0.00050283	-0.2043	10	0.1498	0.3541	--	CsaV3_1G009140|,CsaV3_1G009160|	--	--	CsaV3_1G009150|+	CsaV3_1G009150|
chr1	5716630	5716690	-	0.014549	-0.142212	11	0.24888	0.39109	--	CsaV3_1G009140|,CsaV3_1G009160|	CsaV3_1G009150.1.exon1	CsaV3_1G009150|	--	--
chr1	583217	583335	-	0.0038619	0.172722	12	0.34433	0.17161	--	--	--	--	CsaV3_1G001000|+	--
chr1	5864765	5864857	-	0.00029878	-0.1545	20	0.65753	0.81203	--	--	--	--	CsaV3_1G009460|-	CsaV3_1G009450|
chr1	5871761	5872154	-	0.017029	0.104481	18	0.12017	0.015685	--	CsaV3_1G009460|	--	--	CsaV3_1G009460|-	--
chr1	5878932	5879042	-	0.0074287	0.211451	17	0.78339	0.57194	--	CsaV3_1G009470|	--	--	CsaV3_1G009470|-	CsaV3_1G009460|
chr1	587961	588102	-	0.0020048	-0.126745	17	0.34384	0.47059	--	--	--	--	CsaV3_1G001000|+	CsaV3_1G001000|
chr1	5911259	5911374	-	0.019219	0.165667	16	0.43262	0.26696	--	--	--	--	CsaV3_1G009530|+	CsaV3_1G009530|
chr1	5962666	5962734	-	0.027466	0.153875	8	0.92475	0.77087	--	CsaV3_1G009620|,CsaV3_1G009610|	--	--	CsaV3_1G009620|-	--
chr1	6023945	6024009	-	0.00061187	-0.116	15	0.85902	0.97502	--	--	--	--	CsaV3_1G009750|+	CsaV3_1G009740|
chr1	6039020	6039106	-	0.0004981	-0.181556	30	0.63332	0.81488	--	--	--	--	CsaV3_1G009770|+	CsaV3_1G009760|
chr1	6039932	6039990	-	0.013377	0.271267	10	0.76717	0.4959	--	--	--	--	CsaV3_1G009770|+	--
chr1	6048957	6049078	-	0.016338	-0.153667	9	0.13922	0.29289	--	CsaV3_1G009770|	--	--	CsaV3_1G009780|+	--
chr1	604941	605055	-	0.025067	-0.140765	17	0.60675	0.74751	--	--	--	CsaV3_1G001040|	--	--
chr1	6105204	6105364	-	0.00081558	-0.14154	21	0.52067	0.66221	--	--	--	--	CsaV3_1G009840|+	--
chr1	6121944	6122000	-	0.022819	0.126467	5	0.224	0.097533	--	--	--	CsaV3_1G009850|	--	--
chr1	6130074	6130139	-	0.01092	0.201167	8	0.492	0.29083	--	--	--	--	CsaV3_1G009860|-	CsaV3_1G009850|
chr1	6131082	6131173	-	0.0030116	-0.140771	16	0.46154	0.60231	--	--	--	--	CsaV3_1G009860|-	CsaV3_1G009850|
chr1	6274584	6274655	-	0.041599	-0.106556	9	0.1173	0.22385	--	--	--	CsaV3_1G010110|	--	--
chr1	6327703	6327760	-	0.028901	-0.122367	10	0.25513	0.3775	--	--	--	--	CsaV3_1G010200|+	CsaV3_1G010190|,CsaV3_1G010200|
chr1	634383	634457	-	0.019744	-0.120436	13	0.74013	0.86056	--	--	--	--	CsaV3_1G001120|+	CsaV3_1G001110|
chr1	6395117	6395181	-	0.0061461	-0.205917	12	0.21586	0.42178	--	CsaV3_1G010270|	--	--	CsaV3_1G010270|-	--
chr1	6453143	6453202	-	0.020293	-0.105867	5	0.82033	0.9262	--	CsaV3_1G010350|,CsaV3_1G010340|	--	--	CsaV3_1G010350|-	--
chr1	6558060	6558112	-	0.019761	0.153519	9	0.77063	0.61711	--	--	--	CsaV3_1G010520|	--	--
chr1	657878	657946	-	0.027466	-0.197083	8	0.1725	0.36958	--	--	--	--	CsaV3_1G001170|+	--
chr1	659279	659354	-	3.81e-05	-0.277208	8	0.28275	0.55996	--	--	--	--	CsaV3_1G001170|+	CsaV3_1G001170|
chr1	6663632	6663687	-	0.0034182	0.185	10	0.5308	0.3458	--	--	--	--	CsaV3_1G010740|-	CsaV3_1G010730|
chr1	677580	677635	-	0.0082298	-0.163	7	0.63814	0.80114	--	--	--	--	CsaV3_1G001190|+	CsaV3_1G001190|
chr1	6845521	6845695	-	0.018045	-0.145625	8	0.0685	0.21413	--	CsaV3_1G011020|,CsaV3_1G011040|	--	--	CsaV3_1G011040|-	CsaV3_1G011030|
chr1	6916581	6916804	-	0.014184	0.129426	18	0.7657	0.63628	--	--	--	--	CsaV3_1G011200|+	CsaV3_1G011190|,CsaV3_1G011200|
chr1	6924273	6924382	-	0.0065175	-0.205778	18	0.57228	0.77806	--	--	--	--	CsaV3_1G011210|+	CsaV3_1G011220|,CsaV3_1G011210|
chr1	6924462	6924547	-	0.04232	0.134867	10	0.87993	0.74507	--	--	--	--	CsaV3_1G011210|+	CsaV3_1G011220|,CsaV3_1G011210|
chr1	7008092	7008164	-	0.00088246	-0.196056	6	0.17394	0.37	--	CsaV3_1G011400|,CsaV3_1G011390|	--	--	CsaV3_1G011400|-	CsaV3_1G011380|
chr1	7013971	7014133	-	0.0016458	-0.128435	23	0.14391	0.27235	--	--	--	--	CsaV3_1G011410|-	CsaV3_1G011400|
chr1	7015617	7015751	-	0.0010759	0.201813	16	0.3879	0.18608	--	--	--	--	CsaV3_1G011410|-	--
chr1	7038843	7038946	-	0.018199	0.201333	8	0.42883	0.2275	--	--	--	--	CsaV3_1G011420|-	--
chr1	7039703	7039785	-	0.028707	0.1791	10	0.4935	0.3144	--	--	--	--	CsaV3_1G011420|-	--
chr1	7079694	7079770	-	0.027869	-0.154148	9	0.61493	0.76907	--	--	--	--	CsaV3_1G011450|-	--
chr1	7084644	7084741	-	0.034279	0.142154	13	0.62049	0.47833	--	--	--	--	CsaV3_1G011450|-	--
chr1	7091885	7091952	-	0.039963	0.155375	8	0.71187	0.5565	--	--	--	--	CsaV3_1G011450|-	--
chr1	7138268	7138500	-	0.0055802	0.134603	26	0.54191	0.40731	--	--	--	--	CsaV3_1G011510|+	--
chr1	723720	723842	-	0.014436	0.153194	12	0.73961	0.58642	--	--	--	--	CsaV3_1G001260|+	--
chr1	730415	730556	-	4.25e-05	0.162017	20	0.87833	0.71632	--	--	--	--	CsaV3_1G001260|+	CsaV3_1G001260|
chr1	7338523	7338596	-	0.01381	-0.140667	10	0.79787	0.93853	--	--	--	--	CsaV3_1G011840|-	--
chr1	7354784	7354877	-	3.5e-08	-0.212067	15	0.45162	0.66369	--	--	--	--	CsaV3_1G011860|+	CsaV3_1G011860|
chr1	7374343	7374393	-	0.0047469	0.27319	7	0.78224	0.50905	--	--	--	CsaV3_1G011880|	--	--
chr1	7376480	7376776	-	0.047042	0.225	6	0.58044	0.35544	--	CsaV3_1G011890|	--	--	CsaV3_1G011890|-	CsaV3_1G011880|
chr1	7403314	7403426	-	0.000189	0.188444	15	0.75209	0.56364	--	--	--	--	CsaV3_1G011920|+	--
chr1	7595389	7595441	-	0.01127	-0.133533	5	0.78073	0.91427	--	CsaV3_1G012220|	--	CsaV3_1G012230|	--	CsaV3_1G012240|
chr1	7601791	7601909	-	9.33e-05	-0.155509	19	0.17302	0.32853	--	--	--	--	CsaV3_1G012270|+	CsaV3_1G012230|
chr1	7640225	7640329	-	0.0014452	0.290667	8	0.53175	0.24108	--	--	--	--	CsaV3_1G012330|+	CsaV3_1G012320|
chr1	7646451	7646513	-	0.0055802	-0.268722	6	0.51106	0.77978	--	--	--	--	CsaV3_1G012330|+	--
chr1	7656230	7656357	-	0.00042373	0.258897	13	0.62503	0.36613	--	--	--	--	CsaV3_1G012340|+	--
chr1	7661640	7661711	-	4.22e-06	0.173273	11	0.35485	0.18158	--	CsaV3_1G012340|	--	--	CsaV3_1G012350|-	--
chr1	7667687	7667909	-	0.027466	0.160294	17	0.79471	0.63441	--	CsaV3_1G012350|	--	--	CsaV3_1G012350|-	--
chr1	7736360	7736525	-	0.00015693	-0.236424	11	0.145	0.38142	--	--	--	--	CsaV3_1G012440|+	--
chr1	7789127	7789192	-	0.0030116	0.196	11	0.54439	0.34839	--	--	--	--	CsaV3_1G012530|+	CsaV3_1G012530|
chr1	7791328	7791385	-	0.018045	-0.224944	6	0.60928	0.83422	--	--	--	CsaV3_1G012530|	--	--
chr1	7887965	7888405	-	2.7e-05	0.112427	32	0.40272	0.29029	--	--	--	CsaV3_1G012620|	--	--
chr1	7940052	7940177	-	0.0085883	-0.154051	13	0.21441	0.36846	--	--	--	CsaV3_1G012680|	--	--
chr1	7949934	7949986	-	8.77e-05	0.118378	15	0.33984	0.22147	--	--	--	--	CsaV3_1G012700|+	CsaV3_1G012700|
chr1	7977610	7977698	-	0.0058469	0.138524	14	0.32419	0.18567	--	--	--	--	CsaV3_1G012720|+	--
chr1	799560	799612	-	0.023883	0.220333	7	0.74871	0.52838	--	--	--	--	CsaV3_1G001340|+	CsaV3_1G001340|
chr1	799617	799764	-	0.0067298	0.160872	13	0.92751	0.76664	--	--	--	--	CsaV3_1G001340|+	CsaV3_1G001340|
chr1	8100331	8100455	-	0.0002474	-0.23363	9	0.1313	0.36493	--	--	--	--	CsaV3_1G012830|+	--
chr1	8115551	8115632	-	0.00089351	-0.139476	7	0.047048	0.18652	--	CsaV3_1G012840|,CsaV3_1G012850|	--	--	CsaV3_1G012850|-	--
chr1	8159228	8159297	-	3.47e-05	0.272024	14	0.62748	0.35545	--	CsaV3_1G012900|	--	--	CsaV3_1G012900|-	--
chr1	8173685	8173755	-	0.024166	-0.228	7	0.34814	0.57614	--	--	--	--	CsaV3_1G012910|-	--
chr1	8224237	8224296	-	0.0025099	-0.18025	8	0.31458	0.49483	--	--	--	--	CsaV3_1G012950|-	--
chr1	8227138	8227322	-	4.46e-05	-0.122281	19	0.15875	0.28104	--	--	--	--	CsaV3_1G012950|-	--
chr1	8276618	8276930	-	6.78e-05	0.148302	21	0.58002	0.43171	--	--	--	--	CsaV3_1G012980|+	--
chr1	8282363	8282464	-	0.0037897	-0.108405	14	0.1551	0.2635	--	--	--	CsaV3_1G012980|	--	--
chr1	8319597	8319660	-	0.024006	-0.17181	7	0.60595	0.77776	--	--	--	--	CsaV3_1G013010|+	--
chr1	8323344	8323401	-	0.0027147	-0.173458	8	0.095958	0.26942	--	--	--	--	CsaV3_1G013010|+	--
chr1	8324925	8325172	-	4.29e-06	0.154778	27	0.73238	0.5776	--	--	--	--	CsaV3_1G013010|+	--
chr1	8328126	8328194	-	0.0406	0.141961	17	0.52716	0.3852	--	--	--	--	CsaV3_1G013010|+	CsaV3_1G013010|
chr1	8392685	8392830	-	0.00098704	0.139093	18	0.82304	0.68394	--	--	--	--	CsaV3_1G013050|+	--
chr1	8406896	8407176	-	0.00013632	0.104688	16	0.53781	0.43312	--	CsaV3_1G013060|	--	--	CsaV3_1G013070|+	CsaV3_1G013070|
chr1	8420709	8420778	-	0.040325	0.1738	10	0.61977	0.44597	--	CsaV3_1G013080|	--	--	CsaV3_1G013080|-	--
chr1	8474786	8474847	-	0.0032151	-0.123611	6	0.377	0.50061	--	CsaV3_1G013140|	--	--	CsaV3_1G013140|-	--
chr1	8498740	8498798	-	0.00026855	-0.149083	8	0.09925	0.24833	--	--	--	--	CsaV3_1G013170|+	CsaV3_1G013160|
chr1	8517113	8517243	-	0.047042	0.163944	6	0.52422	0.36028	--	--	--	--	CsaV3_1G013200|+	CsaV3_1G013190|,CsaV3_1G013180|
chr1	8546447	8546518	-	3e-05	0.231939	11	0.57336	0.34142	--	CsaV3_1G013250|	--	--	CsaV3_1G013250|-	--
chr1	8573689	8573807	-	8.25e-06	-0.181653	24	0.74143	0.92308	--	--	--	--	CsaV3_1G013290|+	--
chr1	8605327	8605442	-	0.0085504	0.2	10	0.54443	0.34443	--	--	--	--	CsaV3_1G013310|+	--
chr1	8641087	8641198	-	0.023806	-0.140549	17	0.75204	0.89259	--	--	--	--	CsaV3_1G013360|+	--
chr1	8695899	8695949	-	0.00034694	-0.169133	10	0.7439	0.91303	--	--	--	--	CsaV3_1G013410|+	--
chr1	8696888	8697163	-	0.0015747	0.24254	21	0.6436	0.40106	--	--	--	--	CsaV3_1G013410|+	--
chr1	8697627	8697703	-	0.00051373	0.328833	12	0.6025	0.27367	--	--	--	--	CsaV3_1G013410|+	--
chr1	8701143	8701243	-	0.049756	-0.138333	13	0.28838	0.42672	--	--	--	--	CsaV3_1G013410|+	--
chr1	8734103	8734177	-	0.00060484	0.2509	10	0.62637	0.37547	--	--	--	--	CsaV3_1G013430|-	CsaV3_1G013420|
chr1	8741401	8741458	-	0.0015378	0.138875	8	0.18371	0.044833	--	--	--	--	CsaV3_1G013430|-	--
chr1	8743445	8743503	-	0.0032151	0.317	6	0.93889	0.62189	--	--	--	--	CsaV3_1G013430|-	--
chr1	8810578	8810735	-	0.00061835	0.109117	20	0.8868	0.77768	--	--	--	--	CsaV3_1G013530|+	CsaV3_1G013520|,CsaV3_1G013530|
chr1	8859233	8859317	-	0.0059737	0.114	10	0.3539	0.2399	--	CsaV3_1G013570|	--	--	CsaV3_1G013570|-	--
chr1	8890907	8890982	-	0.00065028	-0.110179	13	0.82621	0.93638	--	--	--	--	CsaV3_1G013620|+	CsaV3_1G013610|
chr1	8900510	8900636	-	0.0066085	-0.161863	17	0.35437	0.51624	--	--	--	--	CsaV3_1G013620|+	--
chr1	8906065	8906131	-	1.86e-05	0.183333	14	0.57202	0.38869	--	--	--	--	CsaV3_1G013620|+	--
chr1	8907153	8907319	-	0.00063692	0.126487	13	0.31238	0.1859	--	--	--	--	CsaV3_1G013620|+	--
chr1	8914057	8914141	-	0.019467	0.139762	21	0.3483	0.20854	--	--	--	--	CsaV3_1G013620|+	--
chr1	8932834	8932911	-	0.0041417	-0.205667	10	0.089933	0.2956	--	--	--	--	CsaV3_1G013720|-	--
chr1	8950055	8950158	-	0.0031704	-0.151521	16	0.28792	0.43944	--	--	--	--	CsaV3_1G013720|-	--
chr1	8950360	8950455	-	0.0066007	0.117308	13	0.45546	0.33815	--	--	--	--	CsaV3_1G013720|-	--
chr1	8975523	8975594	-	9.06e-07	-0.108389	12	0.132	0.24039	--	--	--	--	CsaV3_1G013750|+	--
chr1	8978612	8978722	-	0.027986	0.219222	12	0.59094	0.37172	--	--	--	--	CsaV3_1G013750|+	--
chr1	8979069	8979258	-	1.15e-05	0.141707	33	0.85854	0.71683	--	--	--	--	CsaV3_1G013750|+	--
chr1	8987924	8987981	-	0.0030417	0.142905	7	0.73386	0.59095	--	--	--	--	CsaV3_1G013750|+	--
chr1	8999217	8999387	-	6.28e-06	0.216053	25	0.69083	0.47477	--	--	--	--	CsaV3_1G013750|+	CsaV3_1G013750|
chr1	8999603	8999692	-	0.023343	0.180286	14	0.50155	0.32126	--	--	--	--	CsaV3_1G013750|+	CsaV3_1G013750|
chr1	9011157	9011400	-	0.026963	-0.118409	31	0.48844	0.60685	--	CsaV3_1G013750|	--	--	CsaV3_1G013760|+	--
chr1	9040691	9040803	-	9.8e-05	-0.138517	20	0.65867	0.79718	--	--	--	--	CsaV3_1G013770|+	CsaV3_1G013770|
chr1	9073989	9074082	-	0.021281	0.117485	11	0.7417	0.62421	--	CsaV3_1G013780|	--	--	CsaV3_1G013790|-	--
chr1	9074082	9074168	-	0.00090957	0.216315	18	0.71663	0.50031	--	CsaV3_1G013780|	--	--	CsaV3_1G013790|-	--
chr1	9075213	9075291	-	0.020563	0.111389	12	0.21972	0.10833	--	--	--	--	CsaV3_1G013790|-	--
chr1	9080930	9081054	-	0.00027782	0.103833	20	0.37347	0.26963	--	--	--	--	CsaV3_1G013790|-	--
chr1	9102168	9102364	-	0.00088452	-0.157982	19	0.14863	0.30661	--	--	--	--	CsaV3_1G013810|+	--
chr1	9127445	9127531	-	0.038349	0.163333	12	0.37189	0.20856	--	--	--	--	CsaV3_1G013830|+	--
chr1	9159548	9159627	-	0.020972	-0.18925	12	0.19106	0.38031	--	--	--	--	CsaV3_1G013850|+	--
chr1	9163746	9163803	-	0.024166	0.227905	7	0.68914	0.46124	--	--	--	--	CsaV3_1G013850|+	--
chr1	9184278	9184459	-	0.00095878	0.2842	10	0.73103	0.44683	--	--	--	--	CsaV3_1G013860|-	--
chr1	9209519	9209636	-	0.020912	-0.119312	16	0.058458	0.17777	--	CsaV3_1G013880|	--	--	CsaV3_1G013880|-	--
chr1	9238237	9238292	-	0.039201	-0.148455	22	0.53277	0.68123	--	--	--	--	CsaV3_1G013900|+	--
chr1	9238294	9238389	-	0.047042	-0.288778	6	0.36072	0.6495	--	--	--	--	CsaV3_1G013900|+	--
chr1	9265337	9265492	-	0.013368	-0.199354	16	0.54698	0.74633	--	--	--	--	CsaV3_1G013920|+	--
chr1	9266194	9266294	-	0.00031164	0.145556	15	0.49778	0.35222	--	--	--	--	CsaV3_1G013920|+	--
chr1	9390604	9390758	-	0.0015649	0.154875	16	0.8315	0.67662	--	--	--	--	CsaV3_1G013980|+	--
chr1	9500886	9501020	-	1.26e-06	0.202106	22	0.63794	0.43583	--	--	--	--	CsaV3_1G014030|-	--
chr1	9515510	9515597	-	0.00024191	-0.140381	7	0.15343	0.29381	--	--	--	--	CsaV3_1G014040|-	CsaV3_1G014030|
chr1	9517015	9517079	-	0.028466	0.155722	6	0.82661	0.67089	--	--	--	--	CsaV3_1G014040|-	CsaV3_1G014030|
chr1	951741	951792	-	0.034405	-0.225524	7	0.18833	0.41386	--	--	--	CsaV3_1G001470|	--	--
chr1	9519293	9519349	-	0.00013323	0.133958	8	0.14904	0.015083	--	--	--	--	CsaV3_1G014040|-	--
chr1	9525889	9526058	-	0.014875	-0.131792	16	0.078396	0.21019	--	--	--	--	CsaV3_1G014040|-	--
chr1	9528276	9528337	-	0.028487	-0.111222	9	0.12715	0.23837	--	--	--	--	CsaV3_1G014040|-	--
chr1	9557319	9557402	-	1.58e-07	0.135217	20	0.9182	0.78298	--	CsaV3_1G014050|	--	--	CsaV3_1G014060|+	CsaV3_1G014060|
chr1	9572386	9572577	-	0.0025156	0.11225	28	0.87795	0.7657	--	--	--	--	CsaV3_1G014080|+	--
chr1	9577710	9577896	-	0.00038328	-0.153545	22	0.17217	0.32571	--	--	--	--	CsaV3_1G014080|+	--
chr1	9658600	9658872	-	0.0050701	-0.104833	18	0.063315	0.16815	--	CsaV3_1G014220|	--	--	CsaV3_1G014230|+	--
chr1	9678164	9678486	-	0.0055802	0.106639	49	0.35777	0.25113	--	--	--	--	CsaV3_1G014250|+	--
chr1	9689137	9689225	-	0.010259	0.132451	17	0.38622	0.25376	--	CsaV3_1G014250|	--	--	CsaV3_1G014260|+	--
chr1	9721505	9721593	-	0.0011723	0.131576	11	0.96297	0.83139	--	--	--	--	CsaV3_1G014280|+	CsaV3_1G014280|
chr1	9798223	9798305	-	0.0030408	-0.218333	11	0.63839	0.85673	--	--	--	CsaV3_1G014340|	--	--
chr1	9883160	9883219	-	0.028466	0.141222	6	0.22711	0.085889	--	--	--	CsaV3_1G014400|	CsaV3_1G014420|-	--
chr1	9896530	9896613	-	0.021351	0.1707	10	0.373	0.2023	--	CsaV3_1G014420|	--	--	CsaV3_1G014420|-	--
chr1	9974506	9974616	-	0.023695	0.111578	15	0.24869	0.13711	--	--	--	--	CsaV3_1G014460|+	CsaV3_1G014460|
chr2	10011372	10011491	-	0.0048269	0.174375	16	0.49123	0.31685	--	--	--	--	CsaV3_2G012490|+	CsaV3_2G012480|,CsaV3_2G012490|
chr2	10128537	10128670	-	0.0084376	0.188407	9	0.90911	0.7207	--	--	--	--	CsaV3_2G012590|+	--
chr2	10162882	10162943	-	0.033516	0.2072	5	0.50553	0.29833	--	--	--	--	CsaV3_2G012610|+	--
chr2	10180025	10180461	-	2.2e-07	-0.107648	36	0.82144	0.92909	--	--	--	--	CsaV3_2G012640|+	CsaV3_2G012630|
chr2	10205466	10205591	-	0.00031134	0.196981	18	0.58667	0.38969	--	--	--	--	CsaV3_2G012680|-	CsaV3_2G012670|
chr2	1023371	1023513	-	0.034782	0.145854	16	0.51858	0.37273	--	CsaV3_2G002460|,CsaV3_2G002440|	--	--	CsaV3_2G002450|+	CsaV3_2G002450|
chr2	10244579	10244680	-	0.00072245	0.11963	9	0.13644	0.016815	--	--	--	--	CsaV3_2G012720|-	CsaV3_2G012710|
chr2	10257794	10257871	-	0.00013215	0.146289	15	0.7152	0.56891	--	--	--	--	CsaV3_2G012740|-	CsaV3_2G012730|
chr2	10272307	10272430	-	1.8e-05	0.2124	25	0.74143	0.52903	--	--	--	--	CsaV3_2G012750|+	--
chr2	10307735	10307814	-	0.0011057	-0.261071	14	0.44883	0.7099	--	--	--	--	CsaV3_2G012790|-	--
chr2	10311157	10311297	-	0.028402	-0.105986	24	0.64697	0.75296	--	--	--	--	CsaV3_2G012790|-	--
chr2	10320853	10321068	-	0.014032	0.194205	13	0.75092	0.55672	--	--	--	--	CsaV3_2G012790|-	--
chr2	10366021	10366154	-	0.04455	0.1705	14	0.50683	0.33633	--	--	--	--	CsaV3_2G012830|+	CsaV3_2G012820|
chr2	10408332	10408458	-	0.0045693	-0.217417	12	0.47172	0.68914	--	CsaV3_2G012860|	--	--	CsaV3_2G012860|-	--
chr2	1041687	1041770	-	7.07e-05	-0.317704	9	0.16874	0.48644	--	--	--	--	CsaV3_2G002490|+	CsaV3_2G002490|
chr2	1042336	1042572	-	0.042457	0.213593	9	0.45293	0.23933	--	--	--	--	CsaV3_2G002490|+	CsaV3_2G002490|
chr2	10431358	10431472	-	4.25e-05	0.221806	12	0.68	0.45819	--	--	--	--	CsaV3_2G012880|-	--
chr2	10431948	10432090	-	0.027466	0.128333	17	0.73127	0.60294	--	--	--	--	CsaV3_2G012880|-	--
chr2	10473461	10473594	-	2.57e-09	0.100294	34	0.9628	0.86251	--	CsaV3_2G012900|	--	--	CsaV3_2G012900|-	--
chr2	10529649	10529744	-	1.51e-10	0.225722	18	0.89289	0.66717	--	--	--	--	CsaV3_2G012960|+	--
chr2	10603689	10603927	-	4.64e-05	-0.150111	12	0.12139	0.2715	--	--	--	CsaV3_2G013030|	--	--
chr2	10628663	10628719	-	0.028466	-0.1287	10	0.55233	0.68103	--	--	--	--	CsaV3_2G013070|+	CsaV3_2G013060|
chr2	10664679	10664750	-	0.0015728	0.14131	14	0.82917	0.68786	--	--	--	--	CsaV3_2G013120|+	--
chr2	1068638	1068708	-	0.0015121	0.197	13	0.91731	0.72031	--	--	--	--	CsaV3_2G002520|+	--
chr2	10686873	10686973	-	2.05e-08	0.118681	24	0.95363	0.83494	--	--	--	--	CsaV3_2G013140|+	CsaV3_2G013130|
chr2	10686977	10687059	-	0.010367	0.201778	6	0.85122	0.64944	--	--	--	--	CsaV3_2G013140|+	CsaV3_2G013130|
chr2	10705165	10705265	-	0.027466	0.240417	8	0.77933	0.53892	--	--	--	--	CsaV3_2G013150|+	--
chr2	10742472	10742708	-	0.024068	0.132089	15	0.29107	0.15898	--	--	--	--	CsaV3_2G013180|-	--
chr2	10771252	10771370	-	1.67e-07	-0.217292	16	0.33629	0.55358	--	--	--	--	CsaV3_2G013200|-	CsaV3_2G013190|
chr2	10817479	10817560	-	2.07e-05	-0.196889	18	0.58009	0.77698	--	--	--	--	CsaV3_2G013230|+	--
chr2	10826710	10826762	-	2.57e-06	-0.213278	12	0.40081	0.61408	--	--	CsaV3_2G013230.1.exon4	CsaV3_2G013230|	--	--
chr2	10836090	10836151	-	0.0145	0.17681	7	0.27652	0.099714	--	--	--	--	CsaV3_2G013240|+	--
chr2	10858479	10858545	-	0.00013624	0.290444	9	0.69141	0.40096	--	CsaV3_2G013240|	--	--	CsaV3_2G013250|-	--
chr2	10858910	10859008	-	0.00014989	-0.24086	19	0.37412	0.61498	--	CsaV3_2G013240|	--	--	CsaV3_2G013250|-	--
chr2	10878425	10878481	-	0.040612	-0.152357	14	0.39014	0.5425	--	--	--	--	CsaV3_2G013260|+	--
chr2	10880080	10880160	-	0.013207	0.152524	14	0.3634	0.21088	--	--	--	--	CsaV3_2G013260|+	--
chr2	10891003	10891381	-	0.00076384	0.12768	25	0.30481	0.17713	--	CsaV3_2G013260|	--	--	CsaV3_2G013270|-	--
chr2	10899487	10899586	-	0.004811	0.27781	7	0.61619	0.33838	--	CsaV3_2G013270|	--	--	CsaV3_2G013270|-	--
chr2	10899589	10899665	-	8.51e-07	0.352233	10	0.45287	0.10063	--	CsaV3_2G013270|	--	--	CsaV3_2G013270|-	--
chr2	10909685	10909848	-	5.7e-06	-0.204706	34	0.43425	0.63896	--	--	--	--	CsaV3_2G013280|+	--
chr2	1092116	1092185	-	2.77e-05	-0.136712	22	0.18776	0.32447	--	--	CsaV3_2G002530.1.exon3	CsaV3_2G002530|	--	--
chr2	10922435	10922550	-	2.42e-06	-0.222032	21	0.22217	0.44421	--	--	--	--	CsaV3_2G013280|+	--
chr2	10940293	10940383	-	7.55e-05	0.151917	8	0.21021	0.058292	--	--	--	--	CsaV3_2G013320|-	--
chr2	10962909	10963003	-	0.042558	-0.1105	10	0.817	0.9275	--	CsaV3_2G013330|	--	--	CsaV3_2G013330|-	--
chr2	10969206	10969314	-	0.040821	-0.111524	14	0.69936	0.81088	--	--	--	--	CsaV3_2G013340|+	--
chr2	1100334	1100435	-	9.3e-08	-0.149167	26	0.75126	0.90042	--	--	--	--	CsaV3_2G002550|+	--
chr2	11068810	11068870	-	0.0039825	0.1772	15	0.47444	0.29724	--	CsaV3_2G013470|	--	--	CsaV3_2G013470|-	--
chr2	11126942	11127157	-	0.0099913	0.123556	27	0.63706	0.51351	--	CsaV3_2G013540|	--	--	CsaV3_2G013550|+	--
chr2	11128030	11128135	-	0.0015193	0.147146	16	0.84579	0.69865	--	--	--	--	CsaV3_2G013550|+	--
chr2	11153731	11153847	-	0.0014794	0.226083	8	0.44279	0.21671	--	--	--	--	CsaV3_2G013580|-	--
chr2	11171715	11171796	-	0.020376	0.18763	9	0.52744	0.33981	--	--	--	--	CsaV3_2G013600|-	--
chr2	11178004	11178056	-	0.00038063	0.117714	21	0.75886	0.64114	--	--	--	--	CsaV3_2G013610|+	CsaV3_2G013600|
chr2	11183873	11184195	-	0.0027017	0.171089	30	0.73921	0.56812	--	--	--	--	CsaV3_2G013610|+	--
chr2	11184385	11184598	-	0.017259	-0.142625	8	0.15608	0.29871	--	--	--	--	CsaV3_2G013610|+	--
chr2	11198001	11198056	-	0.0044511	0.2645	8	0.60258	0.33808	--	CsaV3_2G013630|	--	--	CsaV3_2G013630|-	CsaV3_2G013620|
chr2	11207017	11207156	-	0.00041797	0.181947	19	0.78104	0.59909	--	--	--	--	CsaV3_2G013640|+	CsaV3_2G013640|,CsaV3_2G013630|
chr2	11217681	11217782	-	1.02e-06	0.125263	19	0.93054	0.80528	--	--	--	--	CsaV3_2G013660|-	CsaV3_2G013650|
chr2	11277885	11277976	-	0.035032	0.111333	7	0.15405	0.042714	--	--	--	--	CsaV3_2G013750|-	CsaV3_2G013730|,CsaV3_2G013740|
chr2	11310483	11310539	-	0.028299	-0.182143	14	0.39629	0.57843	--	--	--	--	CsaV3_2G013770|+	--
chr2	11317216	11317268	-	0.033492	0.199733	5	0.89267	0.69293	--	--	--	--	CsaV3_2G013770|+	CsaV3_2G013770|
chr2	11374808	11374880	-	0.028211	-0.211963	9	0.53852	0.75048	--	--	--	--	CsaV3_2G013810|-	--
chr2	11390045	11390280	-	0.0066716	0.141359	13	0.71664	0.57528	--	CsaV3_2G013820|	--	--	CsaV3_2G013830|+	--
chr2	11390695	11390928	-	0.0023454	-0.171667	19	0.21975	0.39142	--	--	--	--	CsaV3_2G013830|+	--
chr2	11408810	11408992	-	0.00081015	0.252756	15	0.5954	0.34264	--	--	--	--	CsaV3_2G013860|-	--
chr2	11420988	11421040	-	0.0030142	-0.238429	7	0.2011	0.43952	--	CsaV3_2G013880|	--	--	CsaV3_2G013880|-	--
chr2	11425540	11425617	-	0.020245	0.147556	9	0.90848	0.76093	--	--	--	--	CsaV3_2G013890|+	CsaV3_2G013880|
chr2	1148469	1148666	-	3.71e-06	0.274684	19	0.80832	0.53363	--	--	--	--	CsaV3_2G002640|+	CsaV3_2G002640|
chr2	11485472	11485581	-	0.044772	-0.114762	14	0.3175	0.43226	--	--	--	--	CsaV3_2G013910|+	CsaV3_2G013900|
chr2	1150878	1150941	-	0.0084988	0.145963	9	0.22107	0.075111	--	CsaV3_2G002640|	--	--	CsaV3_2G002650|+	--
chr2	11515070	11515208	-	0.0045021	0.130556	18	0.39324	0.26269	--	--	--	CsaV3_2G013930|	--	--
chr2	11519857	11519920	-	0.0030213	0.18197	11	0.69218	0.51021	--	--	--	--	CsaV3_2G013940|-	--
chr2	11521359	11521426	-	0.020203	0.189593	9	0.38189	0.1923	--	--	--	--	CsaV3_2G013940|-	--
chr2	11535110	11535166	-	2.97e-06	-0.268644	15	0.36069	0.62933	--	--	--	--	CsaV3_2G013950|-	--
chr2	11546799	11546888	-	0.009969	-0.168879	11	0.31039	0.47927	--	--	--	--	CsaV3_2G013960|+	--
chr2	11570959	11571012	-	0.047042	0.110167	6	0.21339	0.10322	--	--	--	--	CsaV3_2G013970|+	--
chr2	11579793	11579894	-	4.44e-05	-0.123029	23	0.71481	0.83784	--	--	--	CsaV3_2G013970|	--	--
chr2	11597909	11597970	-	0.0029878	-0.161	7	0.15286	0.31386	--	--	--	--	CsaV3_2G014010|+	CsaV3_2G014000|,CsaV3_2G014010|
chr2	11603967	11604070	-	0.014524	0.171848	11	0.70818	0.53633	--	CsaV3_2G014020|,CsaV3_2G014010|	--	--	CsaV3_2G014020|-	--
chr2	11641664	11641865	-	2.09e-05	0.224296	36	0.61985	0.39556	--	--	--	--	CsaV3_2G014040|-	--
chr2	11646354	11646439	-	0.0039794	0.115212	11	0.26473	0.14952	--	--	--	--	CsaV3_2G014040|-	--
chr2	11679095	11679322	-	8.06e-07	-0.23125	20	0.60495	0.8362	--	--	--	--	CsaV3_2G014060|-	--
chr2	11729378	11729518	-	2.46e-09	-0.290174	23	0.44635	0.73652	--	--	--	CsaV3_2G014090|	--	--
chr2	11767651	11767713	-	0.020801	0.1298	10	0.93987	0.81007	--	CsaV3_2G014120|	--	--	CsaV3_2G014130|-	--
chr2	11796882	11796932	-	0.047042	0.157722	6	0.82556	0.66783	--	CsaV3_2G014160|	--	--	CsaV3_2G014160|-	--
chr2	11811096	11811183	-	0.0050599	-0.220667	7	0.35581	0.57648	--	--	--	--	CsaV3_2G014180|-	CsaV3_2G014170|
chr2	11829097	11829202	-	0.0040843	0.143373	17	0.32808	0.18471	--	--	--	--	CsaV3_2G014200|+	CsaV3_2G014190|
chr2	11881483	11881537	-	0.034807	-0.104867	5	0.041733	0.1466	--	--	--	--	CsaV3_2G014230|-	--
chr2	11883870	11883951	-	3.12e-08	0.185048	14	0.2366	0.051548	--	--	--	--	CsaV3_2G014230|-	--
chr2	11909706	11909816	-	9.6e-09	0.159773	22	0.96315	0.80338	--	--	--	--	CsaV3_2G014270|+	CsaV3_2G014270|,CsaV3_2G014280|
chr2	11970743	11970931	-	2.42e-07	-0.13163	18	0.12852	0.26015	--	--	--	--	CsaV3_2G014340|+	CsaV3_2G014330|
chr2	12055577	12055686	-	0.042572	0.216556	9	0.53667	0.32011	--	CsaV3_2G014490|	--	--	CsaV3_2G014500|-	--
chr2	12107883	12107944	-	4.93e-05	0.185472	12	0.61861	0.43314	--	--	--	--	CsaV3_2G014540|+	--
chr2	12112467	12112578	-	2.7e-05	0.252762	14	0.3725	0.11974	--	--	--	--	CsaV3_2G014540|+	--
chr2	12131710	12131767	-	0.0055802	0.110556	6	0.19039	0.079833	--	CsaV3_2G014540|	--	--	CsaV3_2G014550|-	--
chr2	12134098	12134195	-	0.027466	-0.139667	13	0.37538	0.51505	--	--	--	--	CsaV3_2G014550|-	--
chr2	12200978	12201085	-	0.027504	0.157037	9	0.32219	0.16515	--	--	--	--	CsaV3_2G014620|+	CsaV3_2G014610|
chr2	12203370	12203430	-	0.0044214	0.172417	8	0.57196	0.39954	--	--	--	--	CsaV3_2G014620|+	CsaV3_2G014620|
chr2	12213412	12213549	-	0.01289	0.111857	14	0.58902	0.47717	--	CsaV3_2G014630|	--	--	CsaV3_2G014640|+	--
chr2	12239137	12239315	-	2.73e-05	0.158917	12	0.32703	0.16811	--	CsaV3_2G014660|	--	--	CsaV3_2G014660|-	--
chr2	12239537	12239659	-	0.010827	0.180769	13	0.86015	0.67938	--	CsaV3_2G014660|	--	--	CsaV3_2G014660|-	--
chr2	12243719	12243777	-	0.024166	0.135905	7	0.79929	0.66338	--	--	--	CsaV3_2G014660|	--	--
chr2	12265704	12265766	-	0.047042	0.378	6	0.793	0.415	--	--	--	--	CsaV3_2G014690|+	CsaV3_2G014680|
chr2	12326698	12326792	-	5.4e-08	-0.11619	28	0.85168	0.96787	--	CsaV3_2G014760|	--	--	CsaV3_2G014760|-	--
chr2	12326885	12326942	-	0.0046558	-0.107879	11	0.76497	0.87285	--	CsaV3_2G014760|	--	--	CsaV3_2G014760|-	--
chr2	12326993	12327358	-	1.56e-07	-0.150051	26	0.7914	0.94145	--	CsaV3_2G014760|	--	--	CsaV3_2G014760|-	--
chr2	12327510	12327573	-	0.021104	0.120222	12	0.68	0.55978	--	CsaV3_2G014760|	--	--	CsaV3_2G014760|-	--
chr2	12351089	12351148	-	0.010827	0.235467	5	0.74253	0.50707	--	--	--	CsaV3_2G014790|	--	--
chr2	12355417	12355487	-	3.9e-10	-0.184286	14	0.73131	0.9156	--	--	--	CsaV3_2G014800|	--	--
chr2	12359251	12359325	-	0.0059114	0.193533	5	0.27553	0.082	--	CsaV3_2G014800|	--	--	CsaV3_2G014810|+	CsaV3_2G014810|
chr2	12363400	12363459	-	0.010367	0.205	6	0.63394	0.42894	--	CsaV3_2G014810|	--	--	CsaV3_2G014820|+	CsaV3_2G014820|
chr2	12427004	12427119	-	0.00057269	-0.155667	12	0.21986	0.37553	--	--	--	--	CsaV3_2G014930|+	--
chr2	12452395	12452478	-	0.0085583	-0.101778	9	0.058667	0.16044	--	--	--	--	CsaV3_2G014960|+	CsaV3_2G014960|
chr2	12472197	12472290	-	2.09e-13	-0.149773	25	0.25088	0.40065	--	--	--	--	CsaV3_2G014980|+	--
chr2	12490337	12490410	-	0.0093226	0.159556	12	0.42419	0.26464	--	--	--	--	CsaV3_2G014990|+	--
chr2	12490818	12490908	-	8.31e-05	0.165708	16	0.4479	0.28219	--	--	--	--	CsaV3_2G014990|+	--
chr2	12509070	12509143	-	0.0032151	-0.118083	12	0.76908	0.88717	--	--	--	--	CsaV3_2G015000|+	--
chr2	12520136	12520190	-	0.0047492	0.25263	9	0.69263	0.44	--	--	--	--	CsaV3_2G015010|+	--
chr2	12523132	12523219	-	0.0023011	-0.158872	13	0.27008	0.42895	--	--	--	--	CsaV3_2G015010|+	CsaV3_2G015010|
chr2	12596326	12596432	-	0.006141	-0.104879	11	0.16045	0.26533	--	CsaV3_2G015100|	--	--	CsaV3_2G015110|+	CsaV3_2G015110|
chr2	12642048	12642109	-	0.047042	0.154722	6	0.71694	0.56222	--	--	--	--	CsaV3_2G015160|+	--
chr2	1266873	1266930	-	0.011253	0.237733	5	0.37867	0.14093	--	CsaV3_2G002820|	--	--	CsaV3_2G002830|+	CsaV3_2G002830|
chr2	12691300	12691438	-	9.28e-06	0.263278	12	0.64819	0.38492	--	--	--	--	CsaV3_2G015210|+	--
chr2	12709561	12709620	-	0.0014122	-0.119407	18	0.79489	0.9143	--	--	CsaV3_2G015220.1.exon1	CsaV3_2G015220|	--	--
chr2	12710071	12710234	-	0.037742	0.114889	21	0.22963	0.11475	--	--	--	--	CsaV3_2G015230|+	CsaV3_2G015220|
chr2	12717025	12717111	-	0.00096983	0.118564	13	0.22646	0.1079	--	CsaV3_2G015240|	--	--	CsaV3_2G015250|+	--
chr2	12723667	12723737	-	0.0042117	-0.167595	14	0.46381	0.6314	--	--	--	--	CsaV3_2G015250|+	CsaV3_2G015250|
chr2	12785210	12785292	-	0.028355	-0.101917	12	0.17825	0.28017	--	--	--	--	CsaV3_2G015330|-	--
chr2	12788592	12788718	-	0.013357	0.114841	23	0.82845	0.71361	--	--	--	--	CsaV3_2G015330|-	--
chr2	12848494	12848581	-	0.028435	0.194852	9	0.52107	0.32622	--	--	--	--	CsaV3_2G015370|+	--
chr2	12880658	12880729	-	2.01e-13	-0.222519	18	0.74965	0.97217	--	--	--	--	CsaV3_2G015390|-	--
chr2	12883813	12883941	-	7.08e-05	0.18625	20	0.82493	0.63868	--	--	--	--	CsaV3_2G015390|-	--
chr2	12908261	12908350	-	0.020455	0.203037	9	0.79104	0.588	--	--	--	--	CsaV3_2G015430|+	--
chr2	12984220	12984280	-	0.024076	0.291048	7	0.5841	0.29305	--	--	--	--	CsaV3_2G015640|-	--
chr2	13007193	13007297	-	2.27e-09	0.285949	13	0.38469	0.098744	--	CsaV3_2G015660|	--	--	CsaV3_2G015670|+	CsaV3_2G015670|
chr2	13043115	13043229	-	0.019557	-0.156333	20	0.46703	0.62337	--	--	--	--	CsaV3_2G015730|+	CsaV3_2G015730|
chr2	13134452	13134598	-	0.00012396	-0.249667	17	0.63792	0.88759	--	--	--	CsaV3_2G015830|	--	--
chr2	13156746	13156821	-	0.028466	-0.104167	6	0.15994	0.26411	--	CsaV3_2G015860|,CsaV3_2G015870|	--	--	CsaV3_2G015870|-	--
chr2	13170505	13170562	-	4.44e-07	-0.1485	20	0.61782	0.76632	--	--	--	--	CsaV3_2G015880|+	--
chr2	13199665	13199741	-	0.0013456	-0.174472	12	0.52336	0.69783	--	--	--	--	CsaV3_2G015910|-	CsaV3_2G015900|
chr2	13208990	13209070	-	0.00015887	-0.131349	21	0.78457	0.91592	--	--	--	--	CsaV3_2G015920|+	CsaV3_2G015910|
chr2	13209256	13209418	-	0.00027761	0.201385	13	0.66872	0.46733	--	--	--	--	CsaV3_2G015920|+	CsaV3_2G015910|
chr2	13225572	13225647	-	4.25e-05	0.253644	15	0.82171	0.56807	--	--	--	--	CsaV3_2G015930|+	--
chr2	13262462	13262577	-	0.0040269	0.192667	17	0.46035	0.26769	--	--	--	--	CsaV3_2G015990|+	CsaV3_2G015990|
chr2	13302733	13302807	-	3.47e-05	0.116333	11	0.20461	0.088273	--	--	--	--	CsaV3_2G016050|+	--
chr2	13303482	13303721	-	0.00044369	-0.132778	18	0.19839	0.33117	--	--	--	--	CsaV3_2G016050|+	--
chr2	13384564	13384633	-	0.027466	0.150167	8	0.24571	0.095542	--	--	--	--	CsaV3_2G016170|-	CsaV3_2G016160|
chr2	1344340	1344521	-	0.018045	0.109632	19	0.71277	0.60314	--	--	--	--	CsaV3_2G002960|-	--
chr2	13517174	13517262	-	0.0035794	-0.180633	10	0.45167	0.6323	--	--	--	--	CsaV3_2G016300|+	CsaV3_2G016300|
chr2	1364165	1364215	-	0.035263	-0.195238	7	0.20757	0.40281	--	--	--	--	CsaV3_2G002970|+	CsaV3_2G002970|
chr2	13691552	13691609	-	0.027466	-0.126458	8	0.54888	0.67533	--	CsaV3_2G016410|,CsaV3_2G016420|	--	--	CsaV3_2G016420|-	--
chr2	13756097	13756193	-	2.8e-05	-0.219216	17	0.31884	0.53806	--	--	--	--	CsaV3_2G016490|+	--
chr2	1375962	1376122	-	6.04e-06	0.154833	20	0.42578	0.27095	--	--	--	--	CsaV3_2G002990|+	CsaV3_2G002980|
chr2	13761445	13761548	-	0.0016621	-0.211104	16	0.64735	0.85846	--	--	--	--	CsaV3_2G016490|+	--
chr2	13813943	13814126	-	0.0090531	-0.132426	18	0.16502	0.29744	--	--	--	--	CsaV3_2G016570|+	CsaV3_2G016560|
chr2	13830577	13830750	-	1.71e-05	0.101796	18	0.13009	0.028296	--	CsaV3_2G016590|	--	--	CsaV3_2G016590|-	CsaV3_2G016580|
chr2	13861013	13861101	-	0.00012359	-0.1336	10	0.0283	0.1619	--	--	--	--	CsaV3_2G016650|+	--
chr2	13884282	13884338	-	0.027466	0.175792	8	0.46175	0.28596	--	--	--	--	CsaV3_2G016670|+	CsaV3_2G016660|
chr2	13894055	13894181	-	0.00066109	-0.164875	16	0.39656	0.56144	--	CsaV3_2G016690|	--	CsaV3_2G016680|	--	--
chr2	13894522	13894618	-	0.0007418	-0.124181	24	0.55493	0.67911	--	CsaV3_2G016690|	CsaV3_2G016680.1.exon2	CsaV3_2G016680|	--	--
chr2	13903171	13903276	-	9.03e-08	-0.224133	15	0.17853	0.40267	--	--	--	--	CsaV3_2G016700|-	--
chr2	13905218	13905350	-	0.0022868	-0.126667	23	0.52025	0.64691	--	--	--	--	CsaV3_2G016700|-	--
chr2	1393018	1393094	-	5.76e-11	-0.226429	14	0.67212	0.89855	--	CsaV3_2G003010|	--	--	CsaV3_2G003020|+	CsaV3_2G003020|
chr2	139579	139681	-	0.0030233	-0.153727	11	0.54815	0.70188	--	--	--	--	CsaV3_2G001050|-	--
chr2	13958905	13959096	-	0.0047486	0.1846	25	0.46257	0.27797	--	--	--	--	CsaV3_2G016710|-	--
chr2	13969267	13969334	-	0.00077964	-0.166452	14	0.36502	0.53148	--	--	--	--	CsaV3_2G016710|-	--
chr2	13974184	13974273	-	0.0045729	-0.108917	24	0.78975	0.89867	--	--	--	--	CsaV3_2G016710|-	--
chr2	13988425	13988542	-	0.0085366	0.172267	20	0.6801	0.50783	--	--	--	--	CsaV3_2G016710|-	--
chr2	14006655	14006759	-	0.028155	-0.102747	25	0.76895	0.87169	CsaV3_2G016710.1.cds1	--	CsaV3_2G016710.1.exon1	CsaV3_2G016710|	--	CsaV3_2G016720|
chr2	140096	140236	-	0.028159	0.199472	12	0.60397	0.4045	--	--	--	--	CsaV3_2G001050|-	--
chr2	14056347	14056426	-	0.028529	0.153963	9	0.38122	0.22726	--	CsaV3_2G016780|	--	--	CsaV3_2G016790|-	--
chr2	14135900	14135951	-	0.020691	0.170545	11	0.45167	0.28112	--	CsaV3_2G016870|,CsaV3_2G016860|	--	--	CsaV3_2G016870|-	--
chr2	14156544	14156613	-	0.028815	0.185667	10	0.50757	0.3219	--	--	--	--	CsaV3_2G016890|+	--
chr2	1416879	1416950	-	0.013758	-0.203538	13	0.35613	0.55967	--	CsaV3_2G003060|,CsaV3_2G003050|	--	--	CsaV3_2G003060|-	--
chr2	141732	141807	-	0.0095849	-0.136233	10	0.39227	0.5285	--	--	--	--	CsaV3_2G001050|-	--
chr2	14220667	14220751	-	0.0019758	0.102627	17	0.81792	0.71529	--	CsaV3_2G016980|	--	--	CsaV3_2G016990|-	--
chr2	14259578	14259664	-	0.0021895	0.216	12	0.79394	0.57794	--	--	--	--	CsaV3_2G017020|+	CsaV3_2G017010|
chr2	14295995	14296143	-	3.69e-07	-0.134362	23	0.18038	0.31474	--	--	--	--	CsaV3_2G017070|-	--
chr2	14296185	14296330	-	0.00095747	0.253333	17	0.76888	0.51555	--	--	--	--	CsaV3_2G017070|-	--
chr2	14304337	14304450	-	0.02011	-0.154718	13	0.36118	0.5159	--	--	--	--	CsaV3_2G017080|+	CsaV3_2G017080|,CsaV3_2G017070|
chr2	14305557	14305646	-	2.37e-05	0.102855	23	0.41662	0.31377	CsaV3_2G017080.1.cds3	CsaV3_2G017090|	CsaV3_2G017080.1.exon3	CsaV3_2G017080|	--	CsaV3_2G017070|
chr2	14387135	14387368	-	0.011242	0.138878	30	0.57812	0.43924	--	--	--	--	CsaV3_2G017260|+	CsaV3_2G017260|
chr2	14437164	14437259	-	6.47e-08	-0.154956	15	0.47613	0.63109	--	--	--	--	CsaV3_2G017330|+	--
chr2	14457331	14457406	-	0.01501	0.115154	13	0.75123	0.63608	--	--	--	--	CsaV3_2G017340|+	CsaV3_2G017340|
chr2	14505321	14505450	-	0.029101	0.2171	10	0.314	0.0969	--	--	--	--	CsaV3_2G017420|+	CsaV3_2G017420|
chr2	14512289	14512353	-	0.03771	-0.270111	9	0.37333	0.64344	--	CsaV3_2G017430|	--	--	CsaV3_2G017450|+	CsaV3_2G017440|
chr2	14582793	14582931	-	9.82e-08	0.117896	16	0.14406	0.026167	--	--	--	--	CsaV3_2G017510|-	--
chr2	1460328	1460455	-	3.02e-05	-0.157204	18	0.25444	0.41165	--	--	--	CsaV3_2G003100|	--	--
chr2	14675962	14676090	-	0.002529	0.115018	19	0.23942	0.1244	--	--	--	--	CsaV3_2G017670|+	--
chr2	14727607	14727721	-	2.98e-05	-0.212544	19	0.72942	0.94196	--	--	--	--	CsaV3_2G017730|+	CsaV3_2G017720|
chr2	14733690	14733837	-	0.00026707	-0.197121	11	0.30333	0.50045	--	--	--	--	CsaV3_2G017730|+	CsaV3_2G017730|
chr2	1473372	1473459	-	0.00017894	-0.153529	17	0.47884	0.63237	--	--	--	--	CsaV3_2G003120|+	CsaV3_2G003110|
chr2	1474755	1475151	-	0.0014123	0.149667	20	0.24087	0.0912	--	--	--	--	CsaV3_2G003120|+	CsaV3_2G003120|
chr2	1481401	1481461	-	0.047042	0.183944	6	0.57578	0.39183	--	CsaV3_2G003130|	--	--	CsaV3_2G003130|-	--
chr2	14875535	14875632	-	0.0095674	0.1852	10	0.57683	0.39163	--	CsaV3_2G017870|	--	--	CsaV3_2G017880|+	CsaV3_2G017880|
chr2	14890530	14890642	-	0.002063	-0.1475	12	0.17053	0.31803	--	CsaV3_2G017890|	--	--	CsaV3_2G017910|-	CsaV3_2G017900|
chr2	14901069	14901255	-	2.2e-06	0.149038	26	0.67972	0.53068	--	--	--	CsaV3_2G017910|	--	--
chr2	14901517	14901604	-	0.022021	-0.116143	14	0.31531	0.43145	--	--	--	CsaV3_2G017910|	--	--
chr2	14949765	14949876	-	0.042908	-0.128933	20	0.62392	0.75285	--	--	--	--	CsaV3_2G017960|+	--
chr2	14990717	14990773	-	0.020585	0.172133	5	0.4092	0.23707	--	--	--	--	CsaV3_2G018020|-	--
chr2	15021542	15021835	-	0.047082	-0.133381	28	0.37189	0.50527	--	--	--	--	CsaV3_2G018030|+	--
chr2	15046302	15046671	-	0.015378	-0.125323	31	0.22916	0.35448	--	--	--	CsaV3_2G018040|	--	--
chr2	15050414	15050474	-	0.0026818	0.221417	8	0.45046	0.22904	--	CsaV3_2G018040|,CsaV3_2G018050|	--	--	CsaV3_2G018050|-	--
chr2	15067000	15067107	-	0.001697	-0.109048	7	0.20238	0.31143	--	CsaV3_2G018070|,CsaV3_2G018060|	--	--	CsaV3_2G018070|-	--
chr2	15095169	15095273	-	3.58e-12	0.2134	20	0.66223	0.44883	--	--	--	--	CsaV3_2G018110|+	--
chr2	15096627	15096692	-	0.01429	0.1998	10	0.70143	0.50163	--	--	--	--	CsaV3_2G018110|+	--
chr2	15146904	15146970	-	0.0042103	0.155067	10	0.36377	0.2087	--	--	--	--	CsaV3_2G018200|+	CsaV3_2G018190|
chr2	1544474	1544530	-	0.041313	0.143303	11	0.60845	0.46515	--	--	--	--	CsaV3_2G003220|+	CsaV3_2G003220|
chr2	15485367	15485448	-	0.018571	0.107857	14	0.34743	0.23957	--	--	--	--	CsaV3_2G019470|+	CsaV3_2G019460|
chr2	15551697	15551762	-	0.019962	-0.101574	18	0.77791	0.87948	--	CsaV3_2G019590|	--	--	CsaV3_2G019590|-	CsaV3_2G019580|
chr2	15617146	15617244	-	0.00021814	-0.154941	17	0.5149	0.66984	--	--	--	--	CsaV3_2G019650|+	CsaV3_2G019640|,CsaV3_2G019650|
chr2	15788789	15788915	-	0.00010292	-0.100922	17	0.093059	0.19398	--	--	--	--	CsaV3_2G019790|+	CsaV3_2G019780|,CsaV3_2G019790|
chr2	1579005	1579064	-	0.037473	0.145292	8	0.95163	0.80633	--	CsaV3_2G003300|	--	--	CsaV3_2G003310|+	CsaV3_2G003310|
chr2	15815282	15815542	-	0.00011908	0.115647	34	0.76225	0.64661	--	--	--	--	CsaV3_2G019810|+	--
chr2	1595127	1595177	-	0.0017131	-0.197593	9	0.65867	0.85626	--	--	--	--	CsaV3_2G003330|+	CsaV3_2G003330|
chr2	16053398	16053496	-	0.00098459	0.161311	15	0.38131	0.22	--	CsaV3_2G021080|	--	CsaV3_2G021070|	--	--
chr2	16087044	16087112	-	0.012849	0.192485	11	0.81848	0.626	--	--	--	--	CsaV3_2G021100|-	CsaV3_2G021090|
chr2	16111001	16111057	-	0.00056489	-0.126111	12	0.77194	0.89806	--	--	--	CsaV3_2G021120|	--	CsaV3_2G021140|,CsaV3_2G021130|
chr2	16342761	16342837	-	0.020119	0.1776	5	0.27047	0.092867	--	--	--	--	CsaV3_2G022180|+	CsaV3_2G022180|
chr2	16352463	16352525	-	0.047042	-0.263167	6	0.55783	0.821	--	--	--	--	CsaV3_2G022190|+	--
chr2	16357399	16357478	-	0.028466	0.116111	6	0.262	0.14589	--	--	--	--	CsaV3_2G022190|+	--
chr2	16360785	16360835	-	0.0053395	-0.168852	9	0.40078	0.56963	--	--	--	--	CsaV3_2G022190|+	--
chr2	16361761	16361863	-	9.89e-05	-0.149698	21	0.7649	0.9146	--	--	--	--	CsaV3_2G022190|+	--
chr2	16363801	16363942	-	0.039705	0.191792	8	0.31992	0.12813	--	--	--	--	CsaV3_2G022190|+	CsaV3_2G022190|
chr2	16475710	16475803	-	1.89e-06	0.206095	14	0.42086	0.21476	--	--	--	--	CsaV3_2G023200|+	--
chr2	1668310	1668379	-	0.0026703	0.209233	10	0.5549	0.34567	--	CsaV3_2G003460|	--	--	CsaV3_2G003480|+	--
chr2	1669874	1669957	-	0.0030116	0.167467	5	0.24387	0.0764	--	--	--	--	CsaV3_2G003480|+	CsaV3_2G003480|
chr2	1670032	1670181	-	1.83e-09	0.275981	18	0.43667	0.16069	--	--	--	--	CsaV3_2G003480|+	CsaV3_2G003480|
chr2	16840415	16840470	-	0.00048816	-0.107694	12	0.80122	0.90892	--	--	--	--	CsaV3_2G024270|+	CsaV3_2G024260|,CsaV3_2G024270|
chr2	16879925	16879981	-	1.5e-08	-0.251833	12	0.68861	0.94044	--	--	--	CsaV3_2G024350|	--	--
chr2	16907068	16907159	-	0.021428	0.132091	11	0.56982	0.43773	--	--	--	--	CsaV3_2G024410|+	--
chr2	16907829	16908068	-	8.98e-09	0.125136	27	0.96019	0.83505	--	--	--	--	CsaV3_2G024410|+	--
chr2	16911426	16911476	-	0.0085506	-0.159074	9	0.22137	0.38044	--	--	--	--	CsaV3_2G024410|+	CsaV3_2G024410|
chr2	16911891	16911974	-	0.005152	-0.36081	7	0.52895	0.88976	--	--	--	--	CsaV3_2G024410|+	CsaV3_2G024410|
chr2	16930869	16930943	-	0.035207	0.136788	11	0.76555	0.62876	--	--	--	CsaV3_2G024430|	CsaV3_2G024450|+	--
chr2	16938697	16938751	-	0.027466	0.184	8	0.62192	0.43792	--	--	--	CsaV3_2G024450|	--	--
chr2	16946737	16946825	-	6.62e-05	-0.283926	9	0.49922	0.78315	--	--	--	--	CsaV3_2G024460|+	CsaV3_2G024460|
chr2	16948686	16948811	-	1.85e-08	-0.206481	18	0.25607	0.46256	--	--	--	CsaV3_2G024460|	--	--
chr2	16974546	16974644	-	2.09e-05	-0.16115	20	0.73713	0.89828	--	CsaV3_2G024490|	--	--	CsaV3_2G024500|+	--
chr2	16974673	16974729	-	0.016326	0.14475	8	0.63746	0.49271	--	CsaV3_2G024490|	--	--	CsaV3_2G024500|+	--
chr2	17233436	17233508	-	0.0001138	-0.122768	23	0.79664	0.91941	--	--	--	--	CsaV3_2G024950|+	CsaV3_2G024950|
chr2	17233509	17233560	-	1.52e-06	-0.280667	18	0.36072	0.64139	--	--	--	--	CsaV3_2G024950|+	CsaV3_2G024950|
chr2	17295050	17295107	-	0.020938	0.241933	10	0.66443	0.4225	--	--	--	--	CsaV3_2G025080|+	CsaV3_2G025080|,CsaV3_2G025070|
chr2	17386417	17386548	-	0.0065879	0.151385	13	0.69362	0.54223	--	CsaV3_2G025260|	--	--	CsaV3_2G025250|+	CsaV3_2G025250|
chr2	17387295	17387352	-	0.0041806	-0.242933	10	0.564	0.80693	--	CsaV3_2G025260|	--	--	CsaV3_2G025250|+	CsaV3_2G025250|,CsaV3_2G025270|
chr2	17419669	17419725	-	1.5e-06	-0.140368	19	0.46011	0.60047	--	--	--	--	CsaV3_2G025330|+	--
chr2	1742134	1742206	-	1.09e-05	-0.141941	17	0.76898	0.91092	--	--	--	CsaV3_2G003550|	--	--
chr2	1744026	1744203	-	1.17e-06	0.137899	23	0.42429	0.28639	--	--	CsaV3_2G003550.1.exon3	CsaV3_2G003550|	--	CsaV3_2G003560|
chr2	17482249	17482402	-	0.00099708	0.240306	12	0.63394	0.39364	--	--	--	--	CsaV3_2G025410|+	CsaV3_2G025410|
chr2	17498654	17498764	-	0.0052316	0.277741	9	0.65726	0.37952	--	--	--	--	CsaV3_2G025430|+	CsaV3_2G025430|
chr2	17558692	17558775	-	0.0081171	0.205259	9	0.74407	0.53881	--	--	--	CsaV3_2G025540|	--	CsaV3_2G025550|
chr2	17599729	17599841	-	0.0034572	0.108648	18	0.61244	0.5038	--	CsaV3_2G025610|,CsaV3_2G025600|	--	--	CsaV3_2G025610|-	--
chr2	17609911	17609989	-	0.0032068	0.156711	15	0.74356	0.58684	--	--	--	--	CsaV3_2G025620|+	CsaV3_2G025620|
chr2	17665340	17665423	-	0.00023336	-0.258152	11	0.32485	0.583	--	CsaV3_2G025730|	--	--	CsaV3_2G025730|-	CsaV3_2G025720|
chr2	17679117	17679223	-	0.028526	0.120545	11	0.65355	0.533	--	--	--	--	CsaV3_2G025770|+	CsaV3_2G025770|
chr2	17717507	17717570	-	0.0021545	0.135722	12	0.77144	0.63572	--	--	--	--	CsaV3_2G025820|+	--
chr2	17717981	17718052	-	0.0488	-0.127897	13	0.61864	0.74654	--	--	--	--	CsaV3_2G025820|+	CsaV3_2G025820|
chr2	17749194	17749300	-	0.018183	0.146872	13	0.80785	0.66097	--	--	--	--	CsaV3_2G025850|+	--
chr2	17762738	17762840	-	0.013024	0.162095	14	0.92676	0.76467	--	--	--	--	CsaV3_2G025880|+	CsaV3_2G025870|
chr2	1780958	1781160	-	0.034376	-0.412133	5	0.36153	0.77367	--	--	--	--	CsaV3_2G003590|+	CsaV3_2G003590|
chr2	17837590	17837671	-	0.0060288	0.18341	13	0.42769	0.24428	--	--	--	--	CsaV3_2G025950|-	--
chr2	17899526	17899632	-	7.3e-08	-0.158028	12	0.074528	0.23256	--	CsaV3_2G026030|	--	--	CsaV3_2G026030|-	--
chr2	17949084	17949221	-	1.67e-05	0.261176	17	0.43145	0.17027	--	--	--	--	CsaV3_2G026170|+	CsaV3_2G026170|
chr2	1800234	1800404	-	2.96e-13	-0.211892	31	0.60832	0.82022	--	--	--	--	CsaV3_2G003610|+	CsaV3_2G003610|
chr2	1800462	1800611	-	0.016684	0.1645	8	0.51267	0.34817	--	--	--	--	CsaV3_2G003610|+	CsaV3_2G003610|
chr2	1801423	1801534	-	0.00022409	-0.102917	16	0.16529	0.26821	--	--	--	--	CsaV3_2G003610|+	CsaV3_2G003610|
chr2	18105809	18106050	-	0.0056092	0.146455	22	0.38955	0.24309	--	--	--	--	CsaV3_2G026480|+	CsaV3_2G026470|
chr2	18106359	18106558	-	0.0012513	-0.128841	21	0.78175	0.91059	--	--	--	--	CsaV3_2G026480|+	CsaV3_2G026470|
chr2	18179946	18180019	-	0.0050737	0.103407	9	0.77581	0.67241	--	--	--	--	CsaV3_2G026600|+	--
chr2	18421259	18421333	-	0.0055802	0.106778	6	0.88094	0.77417	--	CsaV3_2G027840|	--	--	CsaV3_2G027850|+	--
chr2	18422838	18422935	-	0.022498	0.178815	18	0.78957	0.61076	--	--	--	--	CsaV3_2G027850|+	--
chr2	18426654	18426784	-	0.0191	0.127593	9	0.18693	0.059333	--	--	--	--	CsaV3_2G027850|+	--
chr2	18461232	18461287	-	0.00030161	-0.1234	10	0.10877	0.23217	--	--	--	--	CsaV3_2G027920|+	CsaV3_2G027920|
chr2	18465750	18466051	-	0.021733	-0.185867	15	0.36447	0.55033	--	--	--	--	CsaV3_2G027930|+	CsaV3_2G027930|
chr2	18500490	18500586	-	0.034888	0.11925	16	0.7656	0.64635	--	--	--	--	CsaV3_2G027990|-	CsaV3_2G027980|
chr2	18613589	18613694	-	9.1e-10	-0.209933	15	0.50071	0.71064	--	CsaV3_2G028210|,CsaV3_2G028230|	--	--	CsaV3_2G028230|-	CsaV3_2G028220|
chr2	18680560	18680618	-	0.011321	-0.264	5	0.14013	0.40413	--	CsaV3_2G028360|	--	--	CsaV3_2G028370|+	CsaV3_2G028370|
chr2	18698121	18698783	-	0.047042	0.101379	29	0.21968	0.1183	--	--	--	--	CsaV3_2G028410|+	CsaV3_2G028410|,CsaV3_2G028400|
chr2	18737638	18737783	-	8.5e-05	0.274467	15	0.84924	0.57478	--	--	--	--	CsaV3_2G028500|+	CsaV3_2G028490|,CsaV3_2G028500|
chr2	18808276	18808384	-	0.0032261	0.187806	12	0.32683	0.13903	--	CsaV3_2G028650|	--	--	CsaV3_2G028650|-	CsaV3_2G028640|
chr2	18808641	18808742	-	0.029025	-0.123433	10	0.30407	0.4275	--	CsaV3_2G028650|	--	--	CsaV3_2G028650|-	CsaV3_2G028640|
chr2	18878831	18878937	-	6.34e-09	0.187121	11	0.36927	0.18215	--	CsaV3_2G028790|	--	--	CsaV3_2G028780|+	CsaV3_2G028780|
chr2	18935800	18935882	-	0.016077	0.101487	13	0.77523	0.67374	--	--	--	--	CsaV3_2G028910|+	CsaV3_2G028900|
chr2	18972455	18972514	-	0.00048134	-0.129306	12	0.77725	0.90656	--	--	CsaV3_2G028970.1.exon1	CsaV3_2G028970|	--	--
chr2	18987538	18987623	-	4.43e-05	-0.105	17	0.46249	0.56749	--	--	--	CsaV3_2G029000|	--	--
chr2	19044990	19045082	-	2.93e-06	0.222879	11	0.41624	0.19336	--	CsaV3_2G029130|	--	--	CsaV3_2G029130|-	CsaV3_2G029120|
chr2	1921767	1921957	-	0.0019422	0.103	33	0.82791	0.72491	--	CsaV3_2G003790|	--	--	CsaV3_2G003800|+	CsaV3_2G003800|
chr2	19232929	19232989	-	0.021701	-0.150636	11	0.56785	0.71848	--	CsaV3_2G029370|	--	--	CsaV3_2G029380|+	--
chr2	19251207	19251306	-	0.0011475	0.213846	13	0.43518	0.22133	--	CsaV3_2G029390|	--	--	CsaV3_2G029400|+	--
chr2	1930592	1930875	-	0.0055802	0.147433	10	0.65487	0.50743	--	--	--	CsaV3_2G003820|	--	--
chr2	19309429	19309576	-	0.021111	0.1761	10	0.24823	0.072133	--	--	--	--	CsaV3_2G029470|+	CsaV3_2G029470|,CsaV3_2G029460|
chr2	19314805	19314919	-	0.03866	0.183333	8	0.26208	0.07875	--	CsaV3_2G029490|	--	--	CsaV3_2G029490|-	CsaV3_2G029480|
chr2	19345030	19345147	-	1.82e-05	-0.11681	14	0.85955	0.97636	--	--	--	--	CsaV3_2G029550|+	CsaV3_2G029550|
chr2	19361301	19361377	-	0.0021457	0.167889	12	0.88461	0.71672	--	--	--	--	CsaV3_2G029580|+	--
chr2	19363880	19364174	-	0.0012668	0.16142	27	0.5976	0.43619	--	--	--	--	CsaV3_2G029580|+	--
chr2	19412365	19412447	-	0.0011827	-0.140152	11	0.082545	0.2227	--	--	--	--	CsaV3_2G029650|+	CsaV3_2G029640|
chr2	194586	194730	-	0.048437	-0.115436	13	0.75792	0.87336	--	CsaV3_2G001070|	--	--	CsaV3_2G001080|+	CsaV3_2G001060|,CsaV3_2G001080|
chr2	19475204	19475282	-	0.0076357	-0.124644	15	0.53464	0.65929	--	--	--	CsaV3_2G029740|	--	--
chr2	19481744	19481888	-	0.00011134	0.199389	18	0.33067	0.13128	--	--	--	--	CsaV3_2G029760|+	CsaV3_2G029750|
chr2	19491704	19491769	-	3.57e-08	-0.117311	15	0.6318	0.74911	--	CsaV3_2G029770|	--	--	CsaV3_2G029780|+	CsaV3_2G029780|
chr2	19511674	19511775	-	0.0011947	-0.137579	19	0.27596	0.41354	--	--	--	CsaV3_2G029800|	--	--
chr2	19551756	19551841	-	0.00048511	-0.119542	8	0.0041667	0.12371	--	--	--	--	CsaV3_2G029890|-	--
chr2	19570497	19570611	-	3.52e-07	-0.220778	21	0.25544	0.47622	--	--	CsaV3_2G029930.1.exon1	CsaV3_2G029930|	--	--
chr2	19607776	19607883	-	0.028466	-0.170711	15	0.48931	0.66002	--	--	--	--	CsaV3_2G029980|+	--
chr2	19610654	19610716	-	2.95e-07	0.287	15	0.87302	0.58602	--	--	--	--	CsaV3_2G029980|+	--
chr2	19618818	19619182	-	0.024445	0.114562	32	0.45609	0.34153	--	CsaV3_2G029980|	--	--	CsaV3_2G029990|+	--
chr2	19695046	19695109	-	0.032999	0.178615	13	0.47731	0.29869	--	--	--	--	CsaV3_2G030100|-	--
chr2	19697059	19697116	-	1.51e-06	0.178961	17	0.869	0.69004	--	--	--	--	CsaV3_2G030100|-	--
chr2	19821480	19821531	-	0.041369	0.142967	10	0.71933	0.57637	--	--	--	--	CsaV3_2G030210|+	CsaV3_2G030210|,CsaV3_2G030200|
chr2	19853532	19853600	-	0.0030116	0.192333	5	0.28187	0.089533	--	--	--	--	CsaV3_2G030270|+	CsaV3_2G030260|
chr2	19855792	19855851	-	0.033857	0.276467	5	0.601	0.32453	--	--	--	--	CsaV3_2G030270|+	CsaV3_2G030270|
chr2	19891841	19891941	-	0.008884	0.1044	10	0.1398	0.0354	--	--	--	--	CsaV3_2G030310|+	--
chr2	1991104	1991227	-	0.00018811	0.24819	14	0.65895	0.41076	--	--	--	--	CsaV3_2G003880|+	--
chr2	19927136	19927248	-	0.010367	-0.21331	14	0.27086	0.48417	--	--	--	--	CsaV3_2G030360|+	CsaV3_2G030350|
chr2	19929497	19929617	-	2.24e-07	0.166649	19	0.93379	0.76714	--	--	--	--	CsaV3_2G030360|+	--
chr2	19930592	19930712	-	0.017534	0.1795	14	0.57719	0.39769	--	--	--	--	CsaV3_2G030360|+	CsaV3_2G030360|
chr2	19942950	19943163	-	0.0030806	0.120694	24	0.31117	0.19047	--	CsaV3_2G030370|	--	--	CsaV3_2G030390|+	CsaV3_2G030380|
chr2	19965870	19965989	-	0.027466	0.114194	12	0.53181	0.41761	--	--	--	--	CsaV3_2G030410|+	CsaV3_2G030410|
chr2	20012243	20012301	-	0.0099443	-0.190424	11	0.52924	0.71967	--	CsaV3_2G030490|	--	--	CsaV3_2G030490|-	CsaV3_2G030480|
chr2	20024933	20025001	-	0.0010039	-0.170733	10	0.12483	0.29557	--	--	--	--	CsaV3_2G030500|+	--
chr2	20053746	20053837	-	0.00091485	0.164033	10	0.2443	0.080267	--	--	--	--	CsaV3_2G030520|+	--
chr2	20117105	20117171	-	0.0027203	0.12	11	0.68033	0.56033	--	--	--	--	CsaV3_2G030570|+	CsaV3_2G030570|
chr2	20188200	20188287	-	0.0018767	0.190842	19	0.35049	0.15965	--	CsaV3_2G030700|	--	--	CsaV3_2G030700|-	--
chr2	20207720	20207896	-	4.54e-06	-0.192615	13	0.091769	0.28438	--	--	--	--	CsaV3_2G030730|+	CsaV3_2G030720|
chr2	20304042	20304098	-	2.18e-07	-0.131647	17	0.85343	0.98508	--	--	--	--	CsaV3_2G030880|-	--
chr2	20319910	20319987	-	0.011321	-0.160583	8	0.087333	0.24792	--	--	--	--	CsaV3_2G030890|-	CsaV3_2G030880|
chr2	20346114	20346178	-	0.023276	-0.258476	7	0.23824	0.49671	--	--	--	--	CsaV3_2G030930|+	--
chr2	20347667	20347773	-	0.0043491	0.201944	12	0.75764	0.55569	--	--	--	--	CsaV3_2G030930|+	CsaV3_2G030930|
chr2	20380730	20380790	-	0.028466	-0.211889	6	0.50839	0.72028	--	CsaV3_2G030990|	--	--	CsaV3_2G030990|-	CsaV3_2G030980|
chr2	2041317	2041463	-	0.00066926	0.104238	14	0.1619	0.057667	--	--	--	--	CsaV3_2G003950|+	--
chr2	20441954	20442092	-	0.016397	-0.114576	22	0.78053	0.89511	--	--	--	--	CsaV3_2G031080|-	--
chr2	20442886	20442965	-	0.002451	-0.115476	14	0.46745	0.58293	--	--	--	--	CsaV3_2G031080|-	--
chr2	20443906	20443974	-	0.014736	0.101911	15	0.6856	0.58369	--	CsaV3_2G031080|	--	--	CsaV3_2G031080|-	--
chr2	2046271	2046377	-	8.87e-14	0.2397	20	0.36102	0.12132	--	--	--	--	CsaV3_2G003950|+	CsaV3_2G003950|
chr2	20571833	20572006	-	6.62e-09	0.261667	19	0.56005	0.29839	--	CsaV3_2G031250|	--	--	CsaV3_2G031250|-	CsaV3_2G031240|
chr2	20573231	20573291	-	0.033668	0.109972	12	0.31822	0.20825	--	CsaV3_2G031250|	--	--	CsaV3_2G031250|-	--
chr2	20614916	20614990	-	8.9e-06	-0.128212	22	0.34456	0.47277	--	--	--	--	CsaV3_2G031330|+	CsaV3_2G031330|
chr2	20649203	20649268	-	0.035251	-0.264762	7	0.20205	0.46681	--	--	--	--	CsaV3_2G031390|+	--
chr2	20650569	20650654	-	0.021633	-0.148273	11	0.51518	0.66345	--	--	--	--	CsaV3_2G031390|+	--
chr2	20651158	20651294	-	4.9e-06	0.110922	17	0.19804	0.087118	--	--	--	--	CsaV3_2G031390|+	--
chr2	20693175	20693296	-	6.1e-07	-0.212	21	0.37192	0.58392	--	--	--	--	CsaV3_2G031450|+	CsaV3_2G031440|
chr2	20743056	20743272	-	0.018708	-0.178095	14	0.17802	0.35612	--	--	--	--	CsaV3_2G031530|+	CsaV3_2G031510|,CsaV3_2G031520|
chr2	20782398	20782453	-	0.018045	0.208778	6	0.53456	0.32578	--	CsaV3_2G031570|	--	--	CsaV3_2G031580|+	--
chr2	20785793	20785843	-	0.010827	0.171733	5	0.81467	0.64293	--	--	--	--	CsaV3_2G031580|+	--
chr2	20793249	20793448	-	4.35e-06	0.114027	25	0.42797	0.31395	--	CsaV3_2G031580|	--	--	CsaV3_2G031590|+	--
chr2	20800138	20800275	-	0.030852	0.175	19	0.77211	0.59711	--	--	--	CsaV3_2G031590|	--	--
chr2	20823279	20823347	-	0.01432	-0.186524	7	0.15967	0.34619	--	--	CsaV3_2G031630.1.exon2,CsaV3_2G031640.1.exon13	CsaV3_2G031640|,CsaV3_2G031630|	--	--
chr2	20900400	20900482	-	0.00028957	-0.134909	11	0.13221	0.26712	--	--	--	--	CsaV3_2G031720|-	--
chr2	20915657	20915728	-	0.035845	-0.124216	17	0.75839	0.88261	--	--	--	--	CsaV3_2G031740|+	--
chr2	20916400	20916519	-	0.00088966	-0.267103	13	0.51867	0.78577	--	--	--	--	CsaV3_2G031740|+	--
chr2	20932134	20932432	-	0.0027828	0.222796	18	0.7208	0.498	--	--	--	--	CsaV3_2G031770|+	CsaV3_2G031770|
chr2	20942513	20942590	-	0.0042888	0.139158	19	0.80293	0.66377	--	--	--	CsaV3_2G031780|	--	--
chr2	20943982	20944085	-	0.0016583	-0.14725	20	0.30505	0.4523	--	--	--	--	CsaV3_2G031790|+	CsaV3_2G031800|,CsaV3_2G031790|,CsaV3_2G031780|
chr2	20944830	20944883	-	0.00011877	-0.110524	14	0.75833	0.86886	--	--	--	--	CsaV3_2G031790|+	CsaV3_2G031800|,CsaV3_2G031790|,CsaV3_2G031780|
chr2	20957304	20957386	-	0.009475	0.145778	18	0.88861	0.74283	--	--	--	--	CsaV3_2G031820|+	--
chr2	20977937	20978055	-	2.1e-05	0.129944	18	0.31452	0.18457	--	--	--	--	CsaV3_2G031830|+	CsaV3_2G031830|
chr2	21006148	21006356	-	0.003019	0.153608	17	0.51288	0.35927	--	CsaV3_2G031860|	--	--	CsaV3_2G031870|+	--
chr2	21021169	21021267	-	4.69e-05	-0.116873	21	0.54616	0.66303	--	--	--	--	CsaV3_2G031890|+	CsaV3_2G031890|
chr2	21021326	21021413	-	0.0020644	0.187111	9	0.35941	0.1723	--	--	--	--	CsaV3_2G031890|+	CsaV3_2G031890|
chr2	21030211	21030304	-	0.033888	0.10799	35	0.99524	0.88725	--	CsaV3_2G031900|	--	--	CsaV3_2G031900|-	--
chr2	21106342	21106591	-	0.018045	0.113507	23	0.81678	0.70328	--	--	--	--	CsaV3_2G031950|-	--
chr2	21168872	21168965	-	0.00039783	0.11108	29	0.74445	0.63337	--	CsaV3_2G032060|	--	--	CsaV3_2G032070|+	--
chr2	2121940	2121991	-	0.034405	-0.2144	5	0.49167	0.70607	--	CsaV3_2G004120|	--	--	CsaV3_2G004120|-	--
chr2	21232200	21232461	-	0.0027828	0.156436	26	0.79812	0.64168	--	CsaV3_2G032200|	--	--	CsaV3_2G032200|-	--
chr2	21279572	21279692	-	0.018045	0.19241	13	0.82356	0.63115	--	CsaV3_2G032300|	CsaV3_2G032310.1.exon6	CsaV3_2G032310|	--	--
chr2	21320023	21320138	-	5.71e-17	0.145276	35	0.94428	0.799	--	--	--	--	CsaV3_2G032360|+	--
chr2	2139779	2140177	-	0.00049246	-0.11358	23	0.31517	0.42875	--	--	--	--	CsaV3_2G004130|+	CsaV3_2G004130|
chr2	21418790	21418842	-	0.015808	-0.135875	8	0.18246	0.31833	--	--	--	--	CsaV3_2G032460|+	--
chr2	21508823	21509038	-	0.047042	0.142968	21	0.68459	0.54162	--	--	--	--	CsaV3_2G032570|+	CsaV3_2G032560|,CsaV3_2G032570|
chr2	21562386	21562541	-	0.0017355	0.174895	19	0.88065	0.70575	--	CsaV3_2G032650|	--	--	CsaV3_2G032650|-	--
chr2	2167303	2167355	-	8.62e-07	0.128933	10	0.89413	0.7652	--	--	--	--	CsaV3_2G004170|+	--
chr2	21768944	21769092	-	1.5e-06	-0.203456	19	0.28035	0.48381	--	--	--	--	CsaV3_2G032930|-	--
chr2	21771693	21771871	-	0.04687	0.145852	18	0.70663	0.56078	--	--	--	--	CsaV3_2G032930|-	--
chr2	21779917	21780019	-	0.01169	-0.117061	22	0.69792	0.81498	--	--	--	--	CsaV3_2G032950|+	CsaV3_2G032950|,CsaV3_2G032930|
chr2	2187875	2188000	-	0.021205	0.2346	10	0.33567	0.10107	--	--	--	CsaV3_2G004190|	--	--
chr2	21919807	21920149	-	0.038285	0.132765	34	0.83187	0.69911	--	--	--	--	CsaV3_2G033060|+	CsaV3_2G033050|,CsaV3_2G033060|
chr2	219632	219713	-	0.029462	-0.141978	15	0.45093	0.59291	--	CsaV3_2G001100|,CsaV3_2G001110|	--	--	CsaV3_2G001110|-	--
chr2	219745	219806	-	0.028466	-0.283444	6	0.27522	0.55867	--	CsaV3_2G001100|,CsaV3_2G001110|	--	--	CsaV3_2G001110|-	--
chr2	22115495	22115589	-	0.029191	0.152733	15	0.36569	0.21296	--	--	--	--	CsaV3_2G033300|+	--
chr2	22154757	22154876	-	0.0015763	-0.196051	13	0.56292	0.75897	--	--	--	--	CsaV3_2G033380|+	CsaV3_2G033370|,CsaV3_2G033380|
chr2	2218948	2219067	-	9.47e-06	-0.108402	29	0.77969	0.88809	--	CsaV3_2G004250|	CsaV3_2G004240.1.exon1	CsaV3_2G004240|	--	--
chr2	22198395	22198453	-	0.004232	0.114933	10	0.94867	0.83373	--	CsaV3_2G033440|,CsaV3_2G033450|	--	--	CsaV3_2G033450|-	CsaV3_2G033460|
chr2	22243382	22243476	-	0.00043676	0.198048	14	0.59498	0.39693	--	--	--	--	CsaV3_2G033530|+	--
chr2	2225115	2225183	-	0.00040759	0.137872	13	0.85	0.71213	--	--	--	--	CsaV3_2G004260|+	CsaV3_2G004250|
chr2	22274187	22274272	-	3.62e-08	-0.294244	15	0.33078	0.62502	--	--	--	--	CsaV3_2G033560|+	CsaV3_2G033560|
chr2	22285568	22285629	-	0.0012489	0.134606	11	0.50348	0.36888	--	CsaV3_2G033580|	--	--	CsaV3_2G033580|-	CsaV3_2G033570|
chr2	22319508	22319764	-	0.027466	-0.11928	25	0.59819	0.71747	--	--	--	--	CsaV3_2G033640|-	--
chr2	22321587	22321750	-	0.00011788	0.175	21	0.82746	0.65246	--	--	--	--	CsaV3_2G033640|-	--
chr2	22329353	22329432	-	0.0052847	0.184444	9	0.85144	0.667	--	--	--	CsaV3_2G033650|	--	--
chr2	22353258	22353344	-	0.0030251	0.109	14	0.7004	0.5914	--	--	--	--	CsaV3_2G033690|+	CsaV3_2G033690|
chr2	2241859	2241936	-	0.018086	-0.144458	8	0.20583	0.35029	--	--	--	--	CsaV3_2G004290|-	--
chr2	22478295	22478365	-	1.47e-06	0.259897	13	0.80441	0.54451	--	--	--	CsaV3_2G033930|	--	--
chr2	22499890	22499959	-	0.047042	0.151944	6	0.39994	0.248	--	--	--	--	CsaV3_2G033960|+	--
chr2	22512285	22512429	-	4.71e-05	-0.1172	15	0.12309	0.24029	--	--	--	--	CsaV3_2G033980|-	CsaV3_2G033970|
chr2	22607142	22607206	-	0.047042	-0.185667	6	0.275	0.46067	--	--	--	--	CsaV3_2G034160|+	CsaV3_2G034150|
chr2	22657115	22657174	-	0.00068249	0.198333	5	0.482	0.28367	--	--	--	--	CsaV3_2G034240|+	CsaV3_2G034230|
chr2	22660996	22661160	-	0.028466	0.145479	16	0.76871	0.62323	--	CsaV3_2G034250|	--	--	CsaV3_2G034240|+	CsaV3_2G034240|
chr2	22678378	22678506	-	0.011037	-0.171042	8	0.52417	0.69521	--	--	--	--	CsaV3_2G034280|+	--
chr2	22678532	22678635	-	0.028268	-0.114444	15	0.60347	0.71791	--	--	--	--	CsaV3_2G034280|+	--
chr2	22680877	22680943	-	0.033627	-0.1984	5	0.1616	0.36	--	--	--	--	CsaV3_2G034280|+	--
chr2	22698668	22698788	-	0.013362	0.10081	14	0.89007	0.78926	--	--	--	--	CsaV3_2G034280|+	--
chr2	22731612	22731676	-	2.59e-06	0.200778	12	0.89936	0.69858	--	CsaV3_2G034330|	--	--	CsaV3_2G034330|-	--
chr2	2274568	2274738	-	0.020241	0.181308	13	0.49185	0.31054	--	CsaV3_2G004310|	--	--	CsaV3_2G004320|+	--
chr2	22770009	22770080	-	0.047042	0.194222	6	0.33744	0.14322	--	--	--	--	CsaV3_2G034400|-	CsaV3_2G034390|
chr2	22806958	22807043	-	0.042734	0.189167	10	0.58587	0.3967	--	CsaV3_2G034420|	--	--	CsaV3_2G034420|-	--
chr2	22825162	22825221	-	0.008274	-0.188778	9	0.38844	0.57722	--	CsaV3_2G034430|,CsaV3_2G034450|	--	--	CsaV3_2G034440|+	CsaV3_2G034440|
chr2	22828791	22828852	-	0.018045	-0.226833	6	0.2335	0.46033	--	CsaV3_2G034440|	--	--	CsaV3_2G034460|+	CsaV3_2G034450|
chr2	22839328	22839390	-	0.024936	-0.2155	8	0.49412	0.70962	--	--	--	--	CsaV3_2G034480|+	CsaV3_2G034470|
chr2	22853995	22854050	-	9.96e-09	-0.115381	14	0.86545	0.98083	--	--	--	--	CsaV3_2G034500|-	--
chr2	22856040	22856102	-	5.63e-06	-0.105035	19	0.67247	0.77751	--	--	--	--	CsaV3_2G034500|-	--
chr2	22867750	22867995	-	0.0064879	-0.193119	14	0.38417	0.57729	--	--	--	--	CsaV3_2G034500|-	--
chr2	2290681	2290792	-	9.77e-06	0.152381	21	0.38197	0.22959	--	--	--	--	CsaV3_2G004330|+	--
chr2	2291558	2291625	-	0.0032151	0.290556	6	0.92811	0.63756	--	--	--	--	CsaV3_2G004330|+	--
chr2	2291787	2291872	-	8.16e-15	0.227905	21	0.37549	0.14759	--	--	--	--	CsaV3_2G004330|+	--
chr2	2292296	2292435	-	0.0033382	-0.180227	25	0.38379	0.56401	--	--	--	--	CsaV3_2G004330|+	--
chr2	22944919	22945006	-	0.010847	0.1365	16	0.63552	0.49902	--	--	--	--	CsaV3_2G034550|+	CsaV3_2G034540|
chr2	2294758	2294886	-	0.00032745	-0.293267	10	0.24217	0.53543	--	--	--	--	CsaV3_2G004330|+	CsaV3_2G004330|
chr2	23021921	23021980	-	0.00023041	0.236333	9	0.50193	0.26559	--	--	--	--	CsaV3_2G034630|+	CsaV3_2G034630|
chr2	23033756	23034022	-	8.74e-09	0.109214	42	0.87013	0.76092	--	--	--	--	CsaV3_2G034640|+	--
chr2	2304779	2304857	-	2.32e-09	0.17537	18	0.28454	0.10917	--	--	--	--	CsaV3_2G004340|+	CsaV3_2G004340|
chr2	23089381	23089463	-	1.33e-09	-0.210611	18	0.72139	0.932	--	--	--	--	CsaV3_2G034720|+	CsaV3_2G034710|
chr2	23168292	23168427	-	0.039452	0.212697	11	0.45279	0.24009	--	--	--	CsaV3_2G034780|	--	--
chr2	23170887	23171133	-	0.00059728	0.158228	38	0.7163	0.55807	--	--	--	--	CsaV3_2G034790|-	CsaV3_2G034780|
chr2	23203603	23203664	-	5.09e-10	-0.136547	25	0.611	0.74755	CsaV3_2G034810.1.cds1	--	CsaV3_2G034810.1.exon1	CsaV3_2G034810|	--	--
chr2	23204410	23204477	-	0.00144	-0.173913	23	0.46383	0.63774	--	CsaV3_2G034810|	--	--	CsaV3_2G034820|-	--
chr2	23220414	23220549	-	0.038645	0.146333	17	0.66467	0.51833	--	--	--	--	CsaV3_2G034840|+	CsaV3_2G034830|
chr2	23244452	23244569	-	0.0030233	0.102879	11	0.12997	0.027091	--	CsaV3_2G034880|	--	--	CsaV3_2G034880|-	--
chr2	23272792	23272899	-	0.0052698	-0.120074	9	0.063778	0.18385	--	CsaV3_2G034910|	--	--	CsaV3_2G034900|+	CsaV3_2G034900|
chr2	23298528	23298618	-	8.3e-06	0.121685	18	0.92694	0.80526	--	CsaV3_2G034930|	--	--	CsaV3_2G034930|-	--
chr2	23341538	23341591	-	0.0030704	0.233381	7	0.38276	0.14938	--	--	--	--	CsaV3_2G034980|+	CsaV3_2G034970|
chr2	23342827	23342902	-	0.0030233	0.166861	12	0.89181	0.72494	--	--	--	--	CsaV3_2G034980|+	--
chr2	23343582	23343646	-	8.44e-05	-0.125119	14	0.23102	0.35614	--	--	--	--	CsaV3_2G034980|+	--
chr2	23384776	23384838	-	0.00060339	0.182026	13	0.85346	0.67144	--	--	--	--	CsaV3_2G035030|+	--
chr2	23392684	23392763	-	0.024166	0.157476	7	0.77367	0.61619	--	--	--	--	CsaV3_2G035030|+	--
chr2	23444515	23444579	-	0.024162	0.249238	7	0.69238	0.44314	--	--	--	--	CsaV3_2G035090|+	--
chr2	23508831	23508914	-	4.85e-09	-0.13615	20	0.84007	0.97622	--	CsaV3_2G035140|	--	--	CsaV3_2G035150|+	--
chr2	23531210	23531309	-	3.04e-05	-0.103649	37	0.69919	0.80284	--	--	--	--	CsaV3_2G035170|+	CsaV3_2G035170|
chr2	23545738	23545802	-	0.028466	0.102259	9	0.28841	0.18615	--	--	--	--	CsaV3_2G035190|-	--
chr2	23563594	23563646	-	0.047042	0.244944	6	0.74306	0.49811	--	--	--	--	CsaV3_2G035220|+	--
chr2	23609733	23609794	-	0.013073	0.148278	12	0.80197	0.65369	--	--	--	--	CsaV3_2G035300|+	--
chr2	23662713	23662774	-	0.010847	0.181867	5	0.85153	0.66967	--	CsaV3_2G035380|,CsaV3_2G035370|	--	--	CsaV3_2G035390|+	CsaV3_2G035360|
chr2	23668760	23668899	-	0.016488	-0.120364	22	0.69776	0.81812	--	CsaV3_2G035390|	--	--	CsaV3_2G035400|+	--
chr2	23670307	23670432	-	0.000672	0.233024	14	0.65831	0.42529	--	--	--	--	CsaV3_2G035400|+	--
chr2	23721702	23721753	-	2.62e-05	0.179833	12	0.80153	0.62169	--	CsaV3_2G035450|	--	--	CsaV3_2G035460|+	--
chr2	23741648	23741700	-	1.67e-05	-0.1644	10	0.59807	0.76247	--	--	--	--	CsaV3_2G035490|+	--
chr2	23747977	23748101	-	0.00022608	0.221509	19	0.77726	0.55575	--	--	--	--	CsaV3_2G035490|+	--
chr2	23784541	23784634	-	1.44e-05	0.227091	22	0.96468	0.73759	--	--	--	--	CsaV3_2G035510|+	--
chr2	23787935	23788005	-	0.021071	0.172917	12	0.38381	0.21089	--	--	--	--	CsaV3_2G035510|+	CsaV3_2G035510|
chr2	23803775	23803981	-	0.0058527	0.151452	14	0.8109	0.65945	--	--	--	--	CsaV3_2G035520|+	--
chr2	23807696	23807789	-	0.00033268	0.152196	17	0.79498	0.64278	--	--	--	--	CsaV3_2G035520|+	CsaV3_2G035520|
chr2	23865844	23865897	-	0.027466	0.10875	8	0.27908	0.17033	--	--	--	--	CsaV3_2G035580|-	CsaV3_2G035570|
chr2	23867039	23867175	-	0.00012307	0.221433	10	0.34073	0.1193	--	--	--	--	CsaV3_2G035580|-	CsaV3_2G035570|
chr2	23875730	23875811	-	0.00014319	0.196923	13	0.70972	0.51279	--	--	--	--	CsaV3_2G035590|+	CsaV3_2G035590|
chr2	23941279	23941392	-	5.35e-05	0.192976	14	0.59729	0.40431	--	--	--	CsaV3_2G035680|	--	--
chr2	23975806	23975856	-	0.0030566	-0.201476	7	0.70071	0.90219	--	CsaV3_2G035740|	--	--	CsaV3_2G035750|+	--
chr2	24010210	24010294	-	2.15e-08	-0.182487	13	0.72146	0.90395	--	--	--	--	CsaV3_2G035800|+	--
chr2	24022829	24022965	-	1.76e-05	0.214784	17	0.80008	0.58529	--	--	--	--	CsaV3_2G035810|+	--
chr2	24040486	24040564	-	0.0014809	-0.159708	8	0.64846	0.80817	--	CsaV3_2G035820|	--	--	CsaV3_2G035830|+	--
chr2	24077801	24077913	-	2.32e-11	0.110053	19	0.16793	0.057877	--	--	--	CsaV3_2G035860|	--	--
chr2	24079985	24080048	-	0.0055802	-0.230944	6	0.32144	0.55239	--	CsaV3_2G035860|	--	--	CsaV3_2G035870|+	CsaV3_2G035870|
chr2	24146448	24146531	-	2.83e-05	0.169917	12	0.26008	0.090167	--	--	--	--	CsaV3_2G035950|-	CsaV3_2G035940|
chr2	24211200	24211312	-	0.0065032	0.171667	14	0.92283	0.75117	--	--	--	--	CsaV3_2G036020|-	--
chr2	242299	242359	-	0.0055802	0.197278	6	0.94306	0.74578	--	--	--	--	CsaV3_2G001160|+	CsaV3_2G001160|,CsaV3_2G001150|
chr2	24244274	24244328	-	0.0097616	-0.153806	12	0.67356	0.82736	--	--	--	--	CsaV3_2G036080|+	CsaV3_2G036080|
chr2	24322831	24322895	-	0.020207	0.164133	5	0.30813	0.144	--	--	--	CsaV3_2G036120|	--	--
chr2	24363701	24363765	-	0.011288	-0.114167	8	0.22621	0.34037	--	--	--	--	CsaV3_2G036170|+	--
chr2	24407210	24407335	-	4.46e-05	0.215615	13	0.785	0.56938	--	--	--	--	CsaV3_2G036200|-	--
chr2	24420240	24420297	-	0.0026037	-0.148167	10	0.46563	0.6138	--	CsaV3_2G036200|	--	--	CsaV3_2G036200|-	--
chr2	24473290	24473384	-	1.32e-07	0.195754	19	0.34142	0.14567	--	--	--	--	CsaV3_2G036290|+	CsaV3_2G036290|
chr2	24482641	24482728	-	0.015378	0.152146	16	0.49892	0.34677	--	--	--	--	CsaV3_2G036310|+	CsaV3_2G036310|
chr2	24496715	24496786	-	0.039963	-0.190848	11	0.39636	0.58721	--	--	--	--	CsaV3_2G036330|+	--
chr2	2451352	2451450	-	0.02844	-0.115963	9	0.055481	0.17144	--	--	--	--	CsaV3_2G004540|+	CsaV3_2G004530|
chr2	2451581	2451652	-	0.027466	-0.139051	13	0.39662	0.53567	--	--	--	--	CsaV3_2G004540|+	CsaV3_2G004530|
chr2	24619727	24619837	-	0.040481	0.1035	8	0.90333	0.79983	--	--	--	CsaV3_2G036500|	--	CsaV3_2G036510|
chr2	24624121	24624248	-	2.26e-06	-0.12832	25	0.40999	0.53831	--	CsaV3_2G036510|	--	CsaV3_2G036520|	--	--
chr2	24628140	24628265	-	0.017532	0.106333	16	0.43662	0.33029	--	--	--	--	CsaV3_2G036530|+	CsaV3_2G036530|
chr2	24669014	24669129	-	0.028472	0.260519	9	0.57037	0.30985	--	--	--	--	CsaV3_2G036580|-	--
chr2	24690389	24690463	-	1.02e-07	0.131933	15	0.79842	0.66649	--	--	--	--	CsaV3_2G036590|-	--
chr2	24699858	24699992	-	0.010556	-0.244294	17	0.42265	0.66694	--	--	--	--	CsaV3_2G036590|-	--
chr2	24703890	24703999	-	0.0028061	-0.199907	18	0.44926	0.64917	--	--	--	--	CsaV3_2G036590|-	--
chr2	24709264	24709420	-	0.04456	0.130048	14	0.27793	0.14788	--	--	--	--	CsaV3_2G036600|-	CsaV3_2G036590|
chr2	24715784	24715857	-	0.0034921	-0.223861	12	0.37439	0.59825	--	CsaV3_2G036600|	--	--	CsaV3_2G036600|-	--
chr2	24716790	24716869	-	0.00021454	0.392833	6	0.65356	0.26072	--	CsaV3_2G036600|	--	--	CsaV3_2G036600|-	--
chr2	24736881	24737002	-	0.00027024	-0.127364	22	0.72324	0.85061	--	--	--	--	CsaV3_2G036630|+	CsaV3_2G036630|
chr2	24745666	24745763	-	0.038349	0.207	12	0.55572	0.34872	--	CsaV3_2G036630|	--	--	CsaV3_2G036640|-	--
chr2	24749069	24749217	-	0.00010343	-0.183078	17	0.1512	0.33427	--	CsaV3_2G036640|	--	--	CsaV3_2G036640|-	--
chr2	24757068	24757224	-	4.19e-06	0.148517	20	0.75638	0.60787	--	--	--	--	CsaV3_2G036650|-	--
chr2	24761329	24761410	-	5.13e-05	0.114564	26	0.96756	0.853	--	--	--	--	CsaV3_2G036650|-	--
chr2	24776204	24776262	-	0.003019	0.224333	11	0.70748	0.48315	--	--	--	--	CsaV3_2G036660|-	CsaV3_2G036650|
chr2	2584096	2584165	-	0.018045	0.167556	6	0.51128	0.34372	--	--	--	CsaV3_2G004770|	--	--
chr2	2604327	2604410	-	0.0055802	-0.303867	10	0.24937	0.55323	--	--	--	CsaV3_2G004790|	--	--
chr2	2609362	2609436	-	0.0083529	0.149741	9	0.81148	0.66174	--	--	--	CsaV3_2G004790|	--	--
chr2	2617280	2617427	-	0.0031104	0.154833	18	0.86207	0.70724	--	CsaV3_2G004820|	--	CsaV3_2G004800|	--	CsaV3_2G004810|
chr2	2636287	2636355	-	0.00091905	-0.197333	7	0.70314	0.90048	--	CsaV3_2G004860|,CsaV3_2G004850|	--	--	CsaV3_2G004850|-	CsaV3_2G004840|
chr2	2721445	2721523	-	0.008547	0.141519	9	0.41696	0.27544	--	--	--	CsaV3_2G005020|	--	--
chr2	2722591	2722699	-	0.018291	0.162762	14	0.68288	0.52012	--	--	--	CsaV3_2G005020|	--	--
chr2	2722846	2722946	-	0.00015529	0.122033	20	0.91237	0.79033	--	CsaV3_2G005030|	--	CsaV3_2G005020|	--	--
chr2	2730472	2730790	-	0.013176	0.143762	28	0.42446	0.2807	--	CsaV3_2G005050|	--	--	CsaV3_2G005050|-	--
chr2	2760104	2760206	-	2.71e-07	-0.120306	12	0.010667	0.13097	--	--	--	--	CsaV3_2G005080|+	--
chr2	2772985	2773106	-	0.027788	-0.191167	10	0.3899	0.58107	--	--	--	--	CsaV3_2G005080|+	CsaV3_2G005080|
chr2	2777220	2777270	-	0.040553	-0.12325	8	0.21033	0.33358	--	CsaV3_2G005080|	--	--	CsaV3_2G005090|+	--
chr2	2778216	2778276	-	0.00013063	-0.121133	5	0.233	0.35413	--	--	--	--	CsaV3_2G005090|+	--
chr2	2780597	2780704	-	3.86e-05	-0.167857	14	0.44129	0.60914	--	--	CsaV3_2G005090.1.exon1	CsaV3_2G005090|	--	--
chr2	2788284	2788405	-	0.00030562	0.177051	13	0.36277	0.18572	--	--	--	CsaV3_2G005100|	--	CsaV3_2G005110|
chr2	2831766	2831975	-	6.93e-11	-0.236356	30	0.50828	0.74463	--	--	--	--	CsaV3_2G005200|+	CsaV3_2G005200|
chr2	2904569	2904696	-	0.004711	-0.141754	19	0.57826	0.72002	--	--	--	--	CsaV3_2G005300|+	CsaV3_2G005300|
chr2	2928506	2928566	-	0.003936	-0.167208	8	0.51333	0.68054	--	CsaV3_2G005340|	--	--	CsaV3_2G005350|+	CsaV3_2G005350|
chr2	2937216	2937318	-	0.0085307	-0.145564	13	0.24715	0.39272	--	CsaV3_2G005350|	--	--	CsaV3_2G005360|+	CsaV3_2G005360|
chr2	3049174	3049243	-	0.0012371	0.154636	11	0.60555	0.45091	--	--	--	--	CsaV3_2G006420|+	CsaV3_2G006420|
chr2	3062746	3062845	-	0.0032299	-0.116619	14	0.097571	0.21419	--	--	--	--	CsaV3_2G006440|+	--
chr2	309735	309803	-	9.88e-09	-0.366833	14	0.23595	0.60279	--	--	--	--	CsaV3_2G001320|+	CsaV3_2G001320|
chr2	3114448	3114524	-	0.027466	-0.159967	10	0.39153	0.5515	--	--	--	--	CsaV3_2G006480|-	--
chr2	3118694	3118747	-	0.01127	-0.225625	8	0.31967	0.54529	--	--	--	--	CsaV3_2G006480|-	--
chr2	3248663	3248754	-	0.0040974	0.169059	17	0.46975	0.30069	--	CsaV3_2G006630|	--	--	CsaV3_2G006650|+	CsaV3_2G006650|
chr2	3255399	3255462	-	0.00058017	0.174021	16	0.72412	0.5501	--	--	--	CsaV3_2G006650|	--	--
chr2	3300086	3300163	-	0.010367	0.288889	6	0.84556	0.55667	--	CsaV3_2G006720|,CsaV3_2G006710|	--	--	CsaV3_2G006720|-	--
chr2	3313982	3314114	-	1.01e-08	0.237873	21	0.6084	0.37052	--	CsaV3_2G006740|	--	--	CsaV3_2G006740|-	CsaV3_2G006730|
chr2	3333199	3333252	-	0.01392	0.260333	7	0.38138	0.12105	--	--	--	--	CsaV3_2G006770|+	CsaV3_2G006770|
chr2	3335651	3335752	-	0.0020169	0.215972	12	0.63269	0.41672	--	CsaV3_2G006770|	--	--	CsaV3_2G006780|+	CsaV3_2G006780|
chr2	3424280	3424361	-	0.0060379	-0.176433	10	0.62073	0.79717	--	--	--	--	CsaV3_2G006900|+	CsaV3_2G006900|
chr2	3478656	3478756	-	0.019127	-0.2076	10	0.58197	0.78957	--	CsaV3_2G007000|	--	--	CsaV3_2G007000|-	CsaV3_2G006990|
chr2	348925	349039	-	1.09e-05	-0.151556	27	0.70716	0.85872	--	CsaV3_2G001400|	--	--	CsaV3_2G001400|-	CsaV3_2G001390|
chr2	3508509	3508611	-	1.67e-06	-0.215433	10	0.78153	0.99697	--	--	--	--	CsaV3_2G007050|+	CsaV3_2G007040|
chr2	3518368	3518475	-	5.66e-07	0.160833	14	0.9216	0.76076	--	CsaV3_2G007060|	--	--	CsaV3_2G007070|+	CsaV3_2G007070|
chr2	3533342	3533424	-	0.027466	-0.204424	11	0.40415	0.60858	--	--	--	CsaV3_2G007080|	--	--
chr2	3557756	3557948	-	0.034745	0.172311	15	0.6376	0.46529	--	CsaV3_2G007130|	--	--	CsaV3_2G007130|-	--
chr2	3605068	3605132	-	5.57e-06	-0.188593	9	0.78444	0.97304	--	--	--	--	CsaV3_2G007180|+	CsaV3_2G007180|
chr2	3612669	3612734	-	0.00084983	-0.123556	12	0.24075	0.36431	--	--	--	--	CsaV3_2G007190|-	--
chr2	3706963	3707042	-	0.035322	0.131733	5	0.24627	0.11453	--	--	--	--	CsaV3_2G007340|+	CsaV3_2G007330|
chr2	3729327	3729475	-	0.0004728	-0.100196	17	0.27069	0.37088	--	--	--	CsaV3_2G007370|	--	--
chr2	373635	373769	-	6.89e-11	-0.231474	19	0.56675	0.79823	--	--	--	CsaV3_2G001440|	--	--
chr2	375735	375893	-	0.00036765	-0.119533	25	0.84947	0.969	--	--	--	CsaV3_2G001440|	--	--
chr2	377700	377794	-	3.32e-10	0.288854	16	0.80727	0.51842	--	--	--	--	CsaV3_2G001450|-	CsaV3_2G001440|
chr2	3851893	3852012	-	0.033601	0.199759	18	0.47506	0.2753	--	--	--	--	CsaV3_2G007540|+	CsaV3_2G007530|
chr2	3889927	3890043	-	1.83e-08	-0.251741	18	0.50181	0.75356	--	CsaV3_2G007610|	--	--	CsaV3_2G007610|-	CsaV3_2G007600|
chr2	3934138	3934469	-	4.77e-05	0.182517	20	0.3819	0.19938	--	--	--	--	CsaV3_2G007660|-	CsaV3_2G007650|
chr2	3935753	3935925	-	0.01254	0.121385	13	0.82844	0.70705	--	CsaV3_2G007660|	--	--	CsaV3_2G007660|-	--
chr2	3936362	3936465	-	0.0015021	0.1382	15	0.64044	0.50224	--	CsaV3_2G007660|	--	--	CsaV3_2G007660|-	--
chr2	396878	396954	-	4.06e-05	0.197019	18	0.74491	0.54789	--	--	--	--	CsaV3_2G001460|+	CsaV3_2G001460|
chr2	3972776	3973058	-	0.00057088	0.106125	8	0.16992	0.063792	--	--	--	--	CsaV3_2G007690|+	CsaV3_2G007690|
chr2	3990189	3990252	-	0.028501	-0.106148	9	0.41452	0.52067	--	CsaV3_2G007710|	--	--	CsaV3_2G007710|-	CsaV3_2G007700|
chr2	4000403	4000453	-	0.00081737	0.195417	8	0.713	0.51758	--	CsaV3_2G007720|	--	--	CsaV3_2G007730|+	CsaV3_2G007730|
chr2	4010152	4010233	-	0.011602	-0.1125	10	0.15133	0.26383	--	--	--	--	CsaV3_2G007740|+	--
chr2	4079029	4079129	-	0.0002272	0.153564	13	0.74654	0.59297	--	--	--	--	CsaV3_2G007820|+	--
chr2	4110983	4111093	-	0.0053031	0.163455	11	0.51948	0.35603	--	--	--	--	CsaV3_2G007860|+	--
chr2	4112291	4112375	-	0.033492	-0.2104	5	0.39067	0.60107	--	--	--	--	CsaV3_2G007860|+	--
chr2	4127803	4128181	-	0.032361	0.134548	14	0.39667	0.26212	--	--	--	--	CsaV3_2G007870|+	--
chr2	4147752	4147972	-	0.0019553	-0.118417	28	0.4805	0.59892	--	--	--	--	CsaV3_2G007880|+	--
chr2	4147978	4148157	-	0.048757	-0.194722	18	0.42674	0.62146	--	--	--	--	CsaV3_2G007880|+	--
chr2	4151855	4151930	-	0.013661	-0.114719	19	0.68446	0.79918	--	--	--	--	CsaV3_2G007880|+	--
chr2	4152391	4152498	-	0.0092557	-0.147812	16	0.21294	0.36075	--	--	--	--	CsaV3_2G007880|+	--
chr2	4185647	4185724	-	0.027466	0.246792	8	0.49229	0.2455	--	--	--	--	CsaV3_2G007900|-	--
chr2	4204136	4204189	-	0.00044369	-0.215889	6	0.27283	0.48872	--	--	--	--	CsaV3_2G007910|+	--
chr2	4220046	4220121	-	6.78e-05	0.221436	13	0.42877	0.20733	--	--	--	--	CsaV3_2G007920|+	CsaV3_2G007920|
chr2	4231239	4231406	-	0.035046	0.157833	16	0.61285	0.45502	--	--	--	--	CsaV3_2G007940|+	--
chr2	4233480	4233745	-	0.0051286	0.123304	34	0.6656	0.54229	--	--	--	--	CsaV3_2G007940|+	CsaV3_2G007940|
chr2	4253788	4253847	-	1e-05	-0.241476	14	0.20817	0.44964	--	--	--	--	CsaV3_2G007960|-	--
chr2	4358013	4358080	-	0.00015362	-0.314733	10	0.4675	0.78223	--	CsaV3_2G008100|	--	--	CsaV3_2G008100|-	--
chr2	4366547	4366609	-	0.00012164	0.234467	10	0.58213	0.34767	--	CsaV3_2G008110|	--	CsaV3_2G008100|	--	--
chr2	4374913	4375200	-	0.002067	0.193754	19	0.64098	0.44723	--	--	--	CsaV3_2G008100|	CsaV3_2G008120|-	--
chr2	4386159	4386421	-	0.0002261	-0.198692	13	0.58538	0.78408	--	CsaV3_2G008130|	--	--	CsaV3_2G008130|-	CsaV3_2G008120|
chr2	4419729	4419894	-	0.00042323	-0.118127	21	0.3473	0.46543	--	CsaV3_2G008160|	--	--	CsaV3_2G008160|-	--
chr2	4427067	4427131	-	0.006516	0.143429	14	0.93969	0.79626	--	--	--	--	CsaV3_2G008170|-	--
chr2	4464274	4464359	-	0.011403	-0.111333	15	0.79678	0.90811	--	--	--	CsaV3_2G008190|	--	--
chr2	4468700	4468832	-	0.00013323	0.168289	15	0.5154	0.34711	--	--	--	--	CsaV3_2G008200|+	CsaV3_2G008190|
chr2	4497123	4497425	-	0.028453	0.114889	15	0.55116	0.43627	--	--	--	--	CsaV3_2G008220|+	--
chr2	4592162	4592252	-	0.02803	-0.104022	15	0.77358	0.8776	--	--	--	--	CsaV3_2G008310|+	--
chr2	4656625	4656710	-	0.0032151	-0.144513	13	0.14941	0.29392	--	--	--	--	CsaV3_2G008380|-	CsaV3_2G008370|
chr2	4675140	4675255	-	0.012266	0.100548	14	0.28831	0.18776	--	CsaV3_2G008390|	--	--	CsaV3_2G008390|-	--
chr2	4724868	4725000	-	2.13e-05	-0.203533	10	0.13117	0.3347	--	CsaV3_2G008430|	--	--	CsaV3_2G008440|+	CsaV3_2G008440|
chr2	4769564	4769800	-	0.016549	0.128526	26	0.47242	0.3439	--	--	--	CsaV3_2G008470|	--	--
chr2	4776583	4776712	-	0.00014433	-0.160179	28	0.67021	0.83039	--	--	--	CsaV3_2G008470|	--	--
chr2	4887581	4887825	-	0.00010472	0.2371	20	0.82005	0.58295	--	--	--	--	CsaV3_2G008540|+	CsaV3_2G008530|
chr2	4892344	4892458	-	0.027466	0.144564	13	0.46728	0.32272	--	--	--	--	CsaV3_2G008540|+	--
chr2	4933729	4933833	-	1.19e-07	0.164896	16	0.25277	0.087875	--	CsaV3_2G008580|,CsaV3_2G008590|	--	--	CsaV3_2G008590|-	--
chr2	4945036	4945141	-	0.0017131	0.243222	6	0.85506	0.61183	--	--	--	--	CsaV3_2G008600|+	--
chr2	4947367	4947428	-	0.01106	0.164083	8	0.77767	0.61358	--	--	--	--	CsaV3_2G008600|+	CsaV3_2G008600|
chr2	4988192	4988262	-	0.0031104	0.117744	13	0.20459	0.086846	--	--	--	--	CsaV3_2G008650|+	--
chr2	5011685	5011856	-	0.0387	-0.167444	18	0.61069	0.77813	--	--	--	--	CsaV3_2G008650|+	CsaV3_2G008650|
chr2	5033694	5033830	-	1.74e-05	0.230905	14	0.61845	0.38755	--	--	--	--	CsaV3_2G008680|-	CsaV3_2G008670|
chr2	5061200	5061262	-	0.010093	0.142788	11	0.95891	0.81612	--	--	--	--	CsaV3_2G008700|-	--
chr2	5108714	5108808	-	0.0012479	-0.238788	11	0.19424	0.43303	--	CsaV3_2G008720|	--	--	CsaV3_2G008720|-	CsaV3_2G008710|
chr2	5119335	5119405	-	0.00020589	-0.223296	9	0.11756	0.34085	--	--	--	--	CsaV3_2G008740|+	--
chr2	5123075	5123324	-	0.0017371	0.178533	25	0.47881	0.30028	--	--	--	--	CsaV3_2G008740|+	--
chr2	5123391	5123598	-	0.0031776	0.106117	20	0.28777	0.18165	--	--	--	--	CsaV3_2G008740|+	--
chr2	5135619	5135753	-	6.37e-08	-0.137513	26	0.81645	0.95396	--	--	--	CsaV3_2G008740|	--	CsaV3_2G008750|
chr2	5141655	5141735	-	0.0084114	0.165639	12	0.60883	0.44319	--	CsaV3_2G008750|	--	--	CsaV3_2G008760|+	CsaV3_2G008760|
chr2	5171542	5171618	-	0.003208	0.114103	13	0.7579	0.64379	--	--	--	--	CsaV3_2G008770|+	--
chr2	5195356	5195410	-	0.0017076	0.146364	11	0.82688	0.68052	--	--	--	CsaV3_2G008780|	--	--
chr2	5198355	5198536	-	0.028613	-0.184364	11	0.3167	0.50106	--	--	--	CsaV3_2G008780|	--	--
chr2	5320404	5320515	-	2.85e-05	0.213741	18	0.65263	0.43889	--	--	--	--	CsaV3_2G008850|+	--
chr2	5322556	5322767	-	0.021099	-0.132167	22	0.61891	0.75108	--	--	--	--	CsaV3_2G008850|+	--
chr2	5348184	5348399	-	0.0041291	0.164967	20	0.84922	0.68425	--	--	--	--	CsaV3_2G008950|+	--
chr2	5360297	5360456	-	0.0145	0.195818	11	0.41255	0.21673	--	--	--	--	CsaV3_2G008950|+	--
chr2	5394450	5394523	-	0.019776	0.240515	11	0.70491	0.46439	--	--	--	--	CsaV3_2G008960|+	--
chr2	5396356	5396460	-	0.020537	-0.153533	5	0.081133	0.23467	--	--	--	--	CsaV3_2G008960|+	--
chr2	5397053	5397144	-	0.00044307	0.260182	11	0.87542	0.61524	--	--	--	--	CsaV3_2G008960|+	--
chr2	5399532	5399589	-	0.00090597	0.227238	7	0.69152	0.46429	--	--	--	--	CsaV3_2G008960|+	CsaV3_2G008960|
chr2	5474213	5474311	-	0.027466	0.165333	10	0.8767	0.71137	--	CsaV3_2G009010|	--	--	CsaV3_2G009030|+	--
chr2	548078	548191	-	0.014274	0.108622	15	0.235	0.12638	--	--	--	--	CsaV3_2G001730|+	CsaV3_2G001730|
chr2	5482487	5482615	-	0.00068251	0.174843	17	0.45639	0.28155	--	--	--	--	CsaV3_2G009030|+	--
chr2	5483817	5483880	-	0.00053684	0.248583	12	0.77992	0.53133	--	--	--	--	CsaV3_2G009030|+	--
chr2	5490232	5490284	-	0.040211	0.154333	10	0.75527	0.60093	--	--	--	--	CsaV3_2G009030|+	--
chr2	5492868	5493189	-	1.4e-09	0.119207	29	0.92318	0.80398	--	--	--	--	CsaV3_2G009030|+	--
chr2	5505507	5505786	-	0.023192	0.126035	19	0.71086	0.58482	--	--	--	--	CsaV3_2G009030|+	--
chr2	5514919	5515091	-	0.00040715	-0.148617	27	0.37525	0.52386	--	--	--	--	CsaV3_2G009030|+	--
chr2	5527552	5527633	-	0.0017131	0.190273	11	0.80421	0.61394	--	--	--	--	CsaV3_2G009030|+	--
chr2	553108	553228	-	0.0054629	0.195588	17	0.52463	0.32904	--	CsaV3_2G001750|	--	--	CsaV3_2G001750|-	CsaV3_2G001740|
chr2	5578452	5578656	-	2.08e-05	0.189719	19	0.52911	0.33939	--	--	--	CsaV3_2G009070|	--	--
chr2	5596468	5596573	-	0.0032815	0.218667	15	0.69733	0.47867	--	--	--	--	CsaV3_2G009090|-	--
chr2	5597027	5597098	-	0.026635	0.147538	13	0.50897	0.36144	--	--	--	--	CsaV3_2G009090|-	--
chr2	5657166	5657226	-	0.027466	0.238042	8	0.62125	0.38321	--	--	--	CsaV3_2G009140|	--	--
chr2	5661449	5661539	-	0.0031512	-0.118146	16	0.75552	0.87367	--	CsaV3_2G009150|	--	--	CsaV3_2G009160|-	CsaV3_2G009140|
chr2	5669023	5669145	-	1.51e-05	0.248312	16	0.62996	0.38165	--	--	--	--	CsaV3_2G009170|+	CsaV3_2G009160|
chr2	5705465	5705543	-	0.010827	-0.186958	8	0.35079	0.53775	--	--	--	--	CsaV3_2G009220|+	--
chr2	5707935	5708178	-	3.08e-05	0.20048	25	0.54197	0.34149	--	--	--	--	CsaV3_2G009220|+	--
chr2	5727966	5728037	-	8.08e-06	0.170026	13	0.61028	0.44026	--	CsaV3_2G009230|	--	--	CsaV3_2G009240|+	CsaV3_2G009240|
chr2	5754200	5754251	-	0.006054	-0.122909	11	0.58115	0.70406	--	--	--	--	CsaV3_2G009260|+	--
chr2	5756028	5756129	-	0.001258	-0.183903	24	0.62728	0.81118	--	--	--	--	CsaV3_2G009260|+	--
chr2	5760392	5760454	-	1.25e-08	0.164895	19	0.95565	0.79075	--	--	--	--	CsaV3_2G009260|+	--
chr2	5899920	5899975	-	0.027466	0.126667	8	0.40167	0.275	--	--	--	CsaV3_2G009410|	--	--
chr2	5922891	5923038	-	0.014091	0.147333	13	0.80318	0.65585	--	--	--	CsaV3_2G009430|	--	--
chr2	5983523	5983595	-	0.0030659	0.175972	12	0.71311	0.53714	--	--	--	--	CsaV3_2G009490|+	CsaV3_2G009490|
chr2	6053123	6053463	-	0.030231	0.12656	25	0.538	0.41144	--	--	--	--	CsaV3_2G009560|+	CsaV3_2G009550|
chr2	6073526	6073585	-	0.027466	0.159833	12	0.70436	0.54453	--	--	--	CsaV3_2G009580|	--	CsaV3_2G009590|
chr2	6073889	6073999	-	0.042768	0.141933	10	0.21633	0.0744	--	--	--	CsaV3_2G009580|	--	CsaV3_2G009590|
chr2	6109289	6109420	-	9.77e-06	0.137444	21	0.77763	0.64019	--	--	--	--	CsaV3_2G009610|+	--
chr2	6123028	6123086	-	0.014515	0.186429	7	0.76176	0.57533	--	--	--	--	CsaV3_2G009630|+	CsaV3_2G009620|
chr2	6155321	6155441	-	0.0031642	0.175444	12	0.40947	0.23403	--	--	--	--	CsaV3_2G009660|+	--
chr2	6289411	6289500	-	0.00013345	-0.132756	15	0.81271	0.94547	--	--	--	--	CsaV3_2G009740|+	CsaV3_2G009740|
chr2	6328234	6328311	-	0.027466	-0.159917	8	0.65308	0.813	--	--	--	--	CsaV3_2G009790|+	--
chr2	6332090	6332218	-	0.00045634	0.128079	21	0.73619	0.60811	--	--	--	--	CsaV3_2G009790|+	--
chr2	6397057	6397137	-	0.0017131	-0.130303	22	0.62861	0.75891	--	--	--	--	CsaV3_2G009820|+	--
chr2	6415676	6416219	-	0.010458	0.150696	23	0.31514	0.16445	--	CsaV3_2G009830|	--	--	CsaV3_2G009830|-	--
chr2	6480602	6480681	-	0.0033965	0.161593	9	0.44715	0.28556	--	CsaV3_2G009910|,CsaV3_2G009900|	--	--	CsaV3_2G009910|-	--
chr2	648266	648338	-	0.034705	0.183857	7	0.41876	0.2349	--	CsaV3_2G001950|	--	--	CsaV3_2G001960|+	--
chr2	648604	648731	-	0.021118	0.120867	10	0.13547	0.0146	--	CsaV3_2G001950|	--	--	CsaV3_2G001960|+	--
chr2	6632306	6632374	-	0.0052224	0.221259	9	0.58337	0.36211	--	CsaV3_2G009990|	--	--	CsaV3_2G010000|-	--
chr2	6634031	6634162	-	9.11e-05	-0.193333	14	0.11079	0.30412	--	--	--	--	CsaV3_2G010000|-	--
chr2	6681182	6681277	-	0.017534	-0.101756	15	0.43233	0.53409	--	CsaV3_2G010020|	--	--	CsaV3_2G010020|-	--
chr2	6689811	6689944	-	0.020349	-0.207815	9	0.41596	0.62378	--	--	--	--	CsaV3_2G010030|+	CsaV3_2G010020|
chr2	681759	681842	-	0.020026	0.1612	10	0.58757	0.42637	--	--	--	--	CsaV3_2G001990|+	--
chr2	6848553	6848625	-	0.00067596	0.299407	9	0.53974	0.24033	--	--	--	CsaV3_2G010100|	--	CsaV3_2G010090|
chr2	6852690	6852772	-	0.021591	-0.117455	11	0.32033	0.43779	--	--	--	CsaV3_2G010100|	--	--
chr2	6867198	6867267	-	0.0085062	0.126722	18	0.85715	0.73043	--	--	--	--	CsaV3_2G010110|+	--
chr2	6890453	6890514	-	3.75e-05	-0.135899	23	0.72207	0.85797	--	--	CsaV3_2G010130.1.exon2	CsaV3_2G010130|	--	--
chr2	6891042	6891095	-	0.010367	0.114222	6	0.25711	0.14289	--	CsaV3_2G010130|	--	--	CsaV3_2G010140|-	--
chr2	6904885	6904943	-	0.00014041	-0.142292	8	0.45063	0.59292	--	--	--	--	CsaV3_2G010160|-	--
chr2	6961982	6962038	-	0.021265	-0.123111	15	0.75362	0.87673	--	--	--	--	CsaV3_2G010180|+	--
chr2	7023999	7024052	-	0.0047397	0.157044	15	0.92951	0.77247	--	CsaV3_2G010240|	--	--	CsaV3_2G010240|-	--
chr2	7058361	7058434	-	0.0013227	-0.144315	18	0.7478	0.89211	--	--	--	--	CsaV3_2G010280|-	--
chr2	706077	706156	-	0.024166	0.168571	7	0.79152	0.62295	--	--	--	--	CsaV3_2G002020|-	--
chr2	7107870	7107932	-	0.0031191	-0.129139	12	0.19189	0.32103	--	--	--	CsaV3_2G010290|	--	--
chr2	7121350	7121445	-	0.00013284	-0.158111	15	0.48049	0.6386	--	--	--	--	CsaV3_2G010300|-	--
chr2	7150625	7150736	-	0.0020761	-0.158744	13	0.085462	0.24421	--	--	--	--	CsaV3_2G010300|-	--
chr2	7182338	7182495	-	0.01916	0.110769	13	0.15972	0.048949	--	--	--	--	CsaV3_2G010310|-	--
chr2	7188725	7188784	-	0.028466	0.155444	6	0.43539	0.27994	--	--	--	--	CsaV3_2G010310|-	--
chr2	7238270	7238381	-	0.039573	0.178364	11	0.45845	0.28009	--	--	--	--	CsaV3_2G010320|+	--
chr2	723875	723976	-	0.034399	-0.215714	14	0.48824	0.70395	--	--	--	--	CsaV3_2G002030|-	--
chr2	725245	725453	-	0.00072017	-0.155	12	0.42181	0.57681	--	--	--	--	CsaV3_2G002030|-	--
chr2	726597	726824	-	0.020184	0.2258	5	0.41507	0.18927	--	--	--	--	CsaV3_2G002030|-	--
chr2	7340508	7340575	-	0.04691	-0.125519	18	0.58335	0.70887	--	--	--	--	CsaV3_2G010340|-	CsaV3_2G010330|
chr2	7359025	7359168	-	0.0085366	0.309259	9	0.6683	0.35904	--	--	CsaV3_2G010350.1.exon1	CsaV3_2G010350|	--	--
chr2	7433628	7433689	-	0.0033215	0.198185	9	0.71926	0.52107	--	CsaV3_2G010410|	--	--	CsaV3_2G010420|-	CsaV3_2G010400|
chr2	7433720	7433804	-	0.0084556	0.135273	11	0.75394	0.61867	--	CsaV3_2G010410|	--	--	CsaV3_2G010420|-	CsaV3_2G010400|
chr2	7434595	7434667	-	0.00022726	0.114196	17	0.88773	0.77353	--	--	--	--	CsaV3_2G010420|-	--
chr2	7508093	7508415	-	0.0072569	-0.124358	41	0.56491	0.68927	--	--	--	--	CsaV3_2G010460|+	--
chr2	752120	752367	-	0.024056	0.145077	13	0.57641	0.43133	--	--	--	CsaV3_2G002060|	--	CsaV3_2G002070|
chr2	7545782	7545851	-	0.028435	0.168667	9	0.61581	0.44715	--	--	--	--	CsaV3_2G010490|-	--
chr2	7566084	7566191	-	0.027899	0.1902	10	0.5368	0.3466	--	--	--	--	CsaV3_2G010500|-	--
chr2	7636664	7636740	-	0.0075545	-0.142889	15	0.34569	0.48858	--	CsaV3_2G010530|	--	--	CsaV3_2G010540|+	--
chr2	7649052	7649110	-	4.19e-06	0.117111	15	0.82629	0.70918	--	--	CsaV3_2G010540.1.exon1	CsaV3_2G010540|	--	--
chr2	766230	766314	-	1.69e-06	0.1296	10	0.20003	0.070433	--	--	--	CsaV3_2G002080|	--	--
chr2	7673226	7673287	-	1.77e-06	-0.140487	13	0.74944	0.88992	--	--	--	--	CsaV3_2G010560|+	--
chr2	7694895	7695003	-	3.66e-08	-0.116464	23	0.82713	0.94359	--	CsaV3_2G010570|	--	--	CsaV3_2G010570|-	--
chr2	7718582	7718640	-	0.023617	0.183286	7	0.32271	0.13943	--	CsaV3_2G010600|	--	--	CsaV3_2G010600|-	--
chr2	7720934	7721002	-	0.020455	0.155926	9	0.71926	0.56333	--	--	--	CsaV3_2G010600|	--	--
chr2	7749905	7749960	-	0.018229	-0.109708	8	0.087167	0.19687	--	--	--	--	CsaV3_2G010610|+	--
chr2	7754710	7754813	-	0.008198	0.116889	21	0.91497	0.79808	--	--	--	--	CsaV3_2G010610|+	--
chr2	7778577	7778713	-	0.002024	-0.131907	25	0.25863	0.39053	--	--	--	--	CsaV3_2G010620|-	--
chr2	7793398	7793663	-	2.21e-11	0.101618	55	0.91933	0.81771	--	--	--	--	CsaV3_2G010630|+	--
chr2	7793668	7793755	-	9e-06	0.234667	8	0.77475	0.54008	--	--	--	--	CsaV3_2G010630|+	--
chr2	789884	790305	-	1.83e-09	0.114198	37	0.7143	0.6001	--	--	--	--	CsaV3_2G002120|-	CsaV3_2G002110|
chr2	7915710	7915942	-	0.004811	0.168873	21	0.52116	0.35229	--	--	--	--	CsaV3_2G010750|-	--
chr2	7980862	7980925	-	0.00028832	0.134286	14	0.93798	0.80369	--	CsaV3_2G010800|	--	--	CsaV3_2G010810|+	--
chr2	7991632	7991777	-	0.0010464	0.106235	17	0.91414	0.8079	--	--	--	--	CsaV3_2G010810|+	CsaV3_2G010810|
chr2	809726	809809	-	0.02344	0.268238	7	0.85238	0.58414	--	--	--	--	CsaV3_2G002130|+	CsaV3_2G002140|,CsaV3_2G002130|
chr2	8212632	8212682	-	0.014494	0.236381	7	0.55814	0.32176	--	--	--	--	CsaV3_2G010980|-	--
chr2	8237275	8237332	-	0.00029219	-0.130643	14	0.34679	0.47743	--	--	CsaV3_2G010990.1.exon1	CsaV3_2G010990|	--	--
chr2	8244863	8244943	-	7.89e-06	0.174578	15	0.80038	0.6258	--	--	--	--	CsaV3_2G011000|+	CsaV3_2G011000|
chr2	8249638	8249725	-	0.027466	0.202208	8	0.50342	0.30121	--	--	--	CsaV3_2G011000|	--	--
chr2	8321712	8321768	-	2.77e-07	-0.129187	25	0.83105	0.96024	--	--	CsaV3_2G011100.1.exon1	CsaV3_2G011100|	--	--
chr2	8329879	8330120	-	0.012573	0.190806	12	0.52947	0.33867	--	--	--	--	CsaV3_2G011110|+	CsaV3_2G011110|
chr2	8343478	8343533	-	0.020129	0.191867	5	0.23273	0.040867	--	--	--	--	CsaV3_2G011120|+	CsaV3_2G011120|
chr2	8405370	8405420	-	0.047042	0.181333	6	0.33178	0.15044	--	--	--	--	CsaV3_2G011170|-	--
chr2	841881	842041	-	0.0025715	0.118118	17	0.25663	0.13851	--	CsaV3_2G002200|,CsaV3_2G002190|	--	--	CsaV3_2G002200|-	--
chr2	8420547	8420613	-	0.00040715	0.154733	20	0.83003	0.6753	--	--	--	--	CsaV3_2G011190|+	CsaV3_2G011180|,CsaV3_2G011190|
chr2	8424347	8424434	-	0.0018334	0.116105	19	0.89605	0.77995	--	--	--	CsaV3_2G011190|	--	--
chr2	8483061	8483282	-	0.0003805	0.21981	28	0.67227	0.45246	--	--	--	--	CsaV3_2G011240|+	--
chr2	8490495	8490584	-	0.00060295	0.153125	24	0.73615	0.58303	--	--	--	--	CsaV3_2G011240|+	--
chr2	8495044	8495191	-	0.00014957	-0.131412	17	0.30424	0.43565	--	--	--	--	CsaV3_2G011240|+	--
chr2	8506718	8506774	-	0.00040567	0.210513	13	0.67428	0.46377	--	--	CsaV3_2G011240.1.exon1	CsaV3_2G011240|	--	--
chr2	8554178	8554253	-	0.020844	-0.170639	12	0.26333	0.43397	--	CsaV3_2G011280|	--	--	CsaV3_2G011280|-	CsaV3_2G011290|
chr2	8566152	8566268	-	6.85e-15	0.190397	26	0.88154	0.69114	--	CsaV3_2G011300|	--	--	CsaV3_2G011320|+	--
chr2	8568954	8569409	-	0.036177	0.142014	24	0.36664	0.22463	--	--	--	--	CsaV3_2G011320|+	--
chr2	8572524	8572694	-	0.021154	0.181667	16	0.64458	0.46292	--	--	--	--	CsaV3_2G011320|+	--
chr2	8614105	8614243	-	0.0049694	0.23637	9	0.49959	0.26322	--	CsaV3_2G011350|	--	--	CsaV3_2G011340|+	CsaV3_2G011340|
chr2	8666527	8666578	-	0.012964	0.273296	9	0.62452	0.35122	--	--	--	--	CsaV3_2G011380|+	CsaV3_2G011380|
chr2	8700486	8700540	-	0.0062684	-0.132444	12	0.61167	0.74411	--	--	--	--	CsaV3_2G011410|+	CsaV3_2G011410|
chr2	8718914	8718969	-	3.28e-07	0.204857	14	0.84267	0.63781	--	--	--	--	CsaV3_2G011430|+	--
chr2	8733014	8733073	-	0.0145	0.172861	12	0.82608	0.65322	--	--	--	--	CsaV3_2G011440|-	--
chr2	8743284	8743359	-	0.00088071	-0.154714	7	0.52052	0.67524	--	--	--	--	CsaV3_2G011450|+	--
chr2	874580	874630	-	0.0093292	-0.120533	10	0.67767	0.7982	--	--	--	--	CsaV3_2G002250|+	--
chr2	876230	876288	-	0.0052468	0.193519	9	0.67263	0.47911	--	--	--	--	CsaV3_2G002250|+	--
chr2	876528	876630	-	0.0065453	-0.131303	11	0.082455	0.21376	--	--	--	--	CsaV3_2G002250|+	--
chr2	8765784	8765861	-	0.038596	0.113208	8	0.31687	0.20367	--	--	--	--	CsaV3_2G011460|+	--
chr2	876711	876872	-	5.26e-05	0.161521	16	0.37569	0.21417	--	--	--	--	CsaV3_2G002250|+	CsaV3_2G002250|
chr2	885644	885769	-	0.038413	0.127028	12	0.15967	0.032639	--	CsaV3_2G002260|	--	--	CsaV3_2G002270|-	--
chr2	8865846	8865972	-	0.0015531	-0.102156	30	0.77439	0.87654	--	--	--	--	CsaV3_2G011550|-	--
chr2	8876236	8876292	-	2.34e-10	-0.274867	15	0.71822	0.99309	--	--	--	--	CsaV3_2G011570|+	--
chr2	8904630	8904778	-	8.57e-11	-0.231667	29	0.56174	0.7934	--	--	--	--	CsaV3_2G011590|+	CsaV3_2G011590|
chr2	8921568	8921652	-	0.0282	0.117917	12	0.43533	0.31742	--	--	--	--	CsaV3_2G011620|-	--
chr2	8921701	8921864	-	0.049249	-0.184622	15	0.31673	0.50136	--	CsaV3_2G011620|	--	--	CsaV3_2G011620|-	--
chr2	8960941	8960993	-	0.01101	-0.187133	5	0.60133	0.78847	--	--	--	--	CsaV3_2G011660|+	CsaV3_2G011660|
chr2	8974589	8974644	-	0.038756	-0.123583	8	0.41562	0.53921	--	--	--	--	CsaV3_2G011680|-	CsaV3_2G011670|
chr2	8991351	8991419	-	0.014468	0.164238	7	0.26957	0.10533	--	--	--	--	CsaV3_2G011680|-	--
chr2	9010786	9010874	-	0.0026818	-0.2081	10	0.35113	0.55923	--	--	--	--	CsaV3_2G011720|-	--
chr2	9013803	9013882	-	0.0016088	0.1998	10	0.69923	0.49943	--	--	--	--	CsaV3_2G011720|-	--
chr2	9014326	9014499	-	0.00042323	0.111603	21	0.81538	0.70378	--	--	--	--	CsaV3_2G011720|-	--
chr2	9048356	9048426	-	0.035322	-0.147619	7	0.085381	0.233	--	--	--	--	CsaV3_2G011740|+	--
chr2	9059355	9059644	-	1.7e-06	-0.195485	22	0.3005	0.49598	--	--	--	--	CsaV3_2G011750|+	--
chr2	9071655	9072000	-	6.61e-07	-0.205267	20	0.67837	0.88363	--	--	--	--	CsaV3_2G011750|+	--
chr2	9126730	9126823	-	0.0020958	-0.169119	14	0.12538	0.2945	--	--	--	--	CsaV3_2G011780|+	--
chr2	9135115	9135225	-	0.002516	-0.181694	12	0.41964	0.60133	--	--	--	--	CsaV3_2G011780|+	CsaV3_2G011780|,CsaV3_2G011790|
chr2	9275564	9275682	-	0.00067291	-0.118044	15	0.18496	0.303	--	--	--	--	CsaV3_2G011860|+	CsaV3_2G011860|
chr2	9309643	9309715	-	0.00073878	-0.154409	22	0.18824	0.34265	--	CsaV3_2G011910|	--	--	CsaV3_2G011920|+	--
chr2	9310448	9310543	-	0.042544	-0.169133	10	0.11653	0.28567	--	--	--	--	CsaV3_2G011920|+	--
chr2	9316220	9316381	-	3.9e-10	0.161527	31	0.87774	0.71622	--	--	--	CsaV3_2G011920|	--	--
chr2	9360917	9361058	-	2.44e-06	0.111714	21	0.79705	0.68533	--	--	--	--	CsaV3_2G011980|+	--
chr2	9368296	9368364	-	0.04036	0.160917	8	0.53008	0.36917	--	--	--	--	CsaV3_2G011980|+	--
chr2	9368957	9369117	-	0.028529	0.133571	21	0.3091	0.17552	--	--	--	--	CsaV3_2G011980|+	--
chr2	9378064	9378219	-	0.00041877	-0.135667	21	0.50279	0.63846	--	--	--	--	CsaV3_2G011980|+	--
chr2	9414094	9414223	-	9.99e-12	0.171659	46	0.5242	0.35254	--	--	--	--	CsaV3_2G012020|-	--
chr2	9415694	9415827	-	9.14e-07	0.147742	22	0.86077	0.71303	--	--	--	--	CsaV3_2G012020|-	--
chr2	9435733	9435824	-	0.0029308	0.174857	21	0.52314	0.34829	--	--	--	--	CsaV3_2G012030|-	--
chr2	9440056	9440140	-	1.63e-05	0.227271	16	0.51246	0.28519	--	--	--	--	CsaV3_2G012030|-	--
chr2	9440552	9440627	-	2.61e-07	0.259722	12	0.76053	0.50081	--	--	--	--	CsaV3_2G012030|-	--
chr2	9442832	9442966	-	0.015403	0.146758	22	0.41126	0.2645	--	--	--	--	CsaV3_2G012030|-	--
chr2	9457237	9457350	-	3.04e-05	0.126623	23	0.96993	0.8433	--	--	--	--	CsaV3_2G012040|-	--
chr2	9476206	9476359	-	0.027466	-0.130667	9	0.13693	0.26759	--	--	--	--	CsaV3_2G012050|-	--
chr2	9500891	9501118	-	1.65e-08	-0.190427	25	0.19032	0.38075	--	--	--	--	CsaV3_2G012060|-	CsaV3_2G012050|
chr2	9505904	9505982	-	0.0026791	-0.1988	10	0.41493	0.61373	--	--	--	--	CsaV3_2G012060|-	--
chr2	957288	957351	-	0.042663	0.155148	9	0.49826	0.34311	--	--	--	--	CsaV3_2G002370|+	--
chr2	9580985	9581176	-	0.029249	0.142965	19	0.80388	0.66091	--	--	--	--	CsaV3_2G012120|-	--
chr2	960802	960866	-	0.027466	0.205708	8	0.512	0.30629	--	--	--	--	CsaV3_2G002370|+	--
chr2	9640425	9640567	-	0.047042	0.130042	24	0.59914	0.4691	--	CsaV3_2G012150|	--	--	CsaV3_2G012160|+	--
chr2	9655686	9655763	-	0.020418	-0.152741	9	0.14833	0.30107	--	CsaV3_2G012160|	--	--	CsaV3_2G012170|-	--
chr2	9658059	9658109	-	6.52e-05	-0.612238	7	0.11314	0.72538	--	--	--	--	CsaV3_2G012170|-	--
chr2	9663523	9663591	-	1.95e-05	-0.3185	8	0.59142	0.90992	--	--	--	--	CsaV3_2G012170|-	--
chr2	9705048	9705125	-	0.010367	0.236222	6	0.5775	0.34128	--	--	--	--	CsaV3_2G012220|+	--
chr2	9705306	9705634	-	0.017793	0.122813	16	0.24763	0.12481	--	--	--	--	CsaV3_2G012220|+	--
chr2	9707796	9707946	-	0.0059441	0.193754	19	0.78268	0.58893	--	--	--	--	CsaV3_2G012220|+	CsaV3_2G012220|
chr2	9731136	9731211	-	0.033318	0.176472	12	0.52336	0.34689	--	--	--	--	CsaV3_2G012240|+	--
chr2	9836257	9836333	-	0.00070224	0.133267	5	0.2106	0.077333	--	--	--	--	CsaV3_2G012290|-	--
chr2	985582	985649	-	0.042576	0.102037	9	0.36696	0.26493	--	--	--	--	CsaV3_2G002400|+	CsaV3_2G002390|
chr2	9859693	9859756	-	0.028355	0.145767	10	0.22417	0.0784	--	CsaV3_2G012310|,CsaV3_2G012300|	--	--	CsaV3_2G012310|-	--
chr2	9921768	9921863	-	0.00091975	-0.184513	13	0.14097	0.32549	--	--	--	--	CsaV3_2G012340|+	--
chr2	993030	993125	-	0.02836	-0.100111	12	0.57925	0.67936	--	--	--	CsaV3_2G002400|	--	--
chr2	9944377	9944468	-	0.0055802	0.389333	5	0.85413	0.4648	--	--	--	--	CsaV3_2G012380|+	CsaV3_2G012390|,CsaV3_2G012380|,CsaV3_2G012370|
chr2	9960991	9961050	-	8.58e-05	0.252156	15	0.76542	0.51327	--	--	--	--	CsaV3_2G012410|-	--
chr2	9982161	9982264	-	4.58e-06	-0.314179	13	0.57928	0.89346	--	--	--	--	CsaV3_2G012440|+	CsaV3_2G012440|
chr3	10005532	10005632	-	4.69e-10	-0.101889	15	0.087511	0.1894	--	CsaV3_3G013080|	--	--	CsaV3_3G013090|+	CsaV3_3G013090|
chr3	10067256	10067341	-	0.028352	0.135643	14	0.62905	0.4934	--	--	--	CsaV3_3G013260|	--	CsaV3_3G013270|
chr3	10157194	10157263	-	0.024166	0.169524	7	0.63281	0.46329	--	CsaV3_3G013460|	--	--	CsaV3_3G013470|+	--
chr3	1019835	1019986	-	0.02101	0.100636	22	0.63018	0.52955	--	--	--	--	CsaV3_3G001330|+	--
chr3	10226542	10226659	-	0.0082976	-0.150467	15	0.14129	0.29176	--	CsaV3_3G013550|	--	--	CsaV3_3G013560|-	--
chr3	10270166	10270221	-	0.0052362	-0.131852	9	0.46563	0.59748	--	--	--	--	CsaV3_3G013640|-	CsaV3_3G013630|
chr3	10401696	10401891	-	5.05e-05	-0.163985	22	0.71639	0.88038	--	--	--	--	CsaV3_3G013880|+	CsaV3_3G013870|
chr3	10426190	10426428	-	0.02756	-0.223515	11	0.26985	0.49336	--	--	--	--	CsaV3_3G013910|+	CsaV3_3G013900|,CsaV3_3G013910|
chr3	1045267	1045641	-	1.6e-08	-0.149015	45	0.6781	0.82712	--	--	--	--	CsaV3_3G001360|+	CsaV3_3G001350|
chr3	10458682	10458787	-	0.0094915	-0.185233	10	0.099867	0.2851	--	--	--	CsaV3_3G013970|	--	--
chr3	10496279	10496350	-	0.028529	0.175074	9	0.31548	0.14041	--	--	--	CsaV3_3G014030|	--	--
chr3	10533094	10533211	-	0.040545	0.172292	8	0.48471	0.31242	--	--	--	CsaV3_3G014060|	--	--
chr3	10579519	10579595	-	0.0027101	-0.174083	8	0.39858	0.57267	--	--	--	--	CsaV3_3G014090|+	CsaV3_3G014090|
chr3	10602481	10602531	-	9.54e-09	0.211956	15	0.83404	0.62209	--	--	--	--	CsaV3_3G014110|+	--
chr3	10626279	10626433	-	0.047042	0.166722	6	0.42861	0.26189	--	CsaV3_3G014160|	--	--	CsaV3_3G014160|-	CsaV3_3G014150|
chr3	10639446	10639511	-	0.00028867	0.249667	11	0.56221	0.31255	--	CsaV3_3G014170|	--	--	CsaV3_3G014180|+	CsaV3_3G014180|
chr3	10678243	10678330	-	1.3e-05	-0.140389	18	0.45981	0.6002	--	--	--	--	CsaV3_3G014270|-	--
chr3	10730535	10730614	-	2.66e-06	-0.213333	12	0.21197	0.42531	--	CsaV3_3G014330|	--	--	CsaV3_3G014330|-	--
chr3	10742249	10742328	-	2.81e-15	-0.225491	19	0.64005	0.86554	--	--	--	--	CsaV3_3G014340|+	CsaV3_3G014340|
chr3	10810961	10811074	-	0.027466	0.213821	13	0.55228	0.33846	--	CsaV3_3G014460|	--	--	CsaV3_3G014460|-	CsaV3_3G014450|
chr3	10827123	10827241	-	0.020263	-0.173212	11	0.18773	0.36094	--	CsaV3_3G014480|,CsaV3_3G014490|	--	--	CsaV3_3G014490|-	--
chr3	10837411	10837509	-	0.0064964	0.140778	12	0.41564	0.27486	--	--	--	CsaV3_3G014520|	--	CsaV3_3G014510|
chr3	1083876	1083972	-	0.010066	-0.156444	12	0.19344	0.34989	--	--	--	--	CsaV3_3G001400|-	CsaV3_3G001390|
chr3	10884283	10884342	-	3.42e-05	-0.1579	10	0.74517	0.90307	--	--	--	--	CsaV3_3G014590|+	CsaV3_3G014590|
chr3	10893176	10893244	-	0.00025065	0.211815	9	0.82467	0.61285	--	--	--	--	CsaV3_3G014610|-	CsaV3_3G014600|
chr3	1089822	1089879	-	0.023975	0.213857	7	0.73019	0.51633	--	--	--	--	CsaV3_3G001400|-	--
chr3	10957036	10957136	-	0.0055802	-0.241611	6	0.17156	0.41317	--	CsaV3_3G014760|	--	--	CsaV3_3G014760|-	CsaV3_3G014750|
chr3	11003917	11004147	-	0.0011283	0.180269	26	0.48022	0.29995	--	--	--	--	CsaV3_3G014830|+	CsaV3_3G014820|
chr3	11004605	11004675	-	0.0097557	0.165636	11	0.76809	0.60245	--	--	--	--	CsaV3_3G014830|+	--
chr3	11022501	11022581	-	0.0038983	-0.146333	16	0.18958	0.33592	--	--	--	--	CsaV3_3G014860|+	CsaV3_3G014850|
chr3	11045050	11045141	-	0.012422	-0.135074	9	0.48096	0.61604	--	CsaV3_3G014890|	--	--	CsaV3_3G014900|+	CsaV3_3G014900|
chr3	11064817	11064948	-	0.0055802	0.162378	15	0.76607	0.60369	--	CsaV3_3G014920|	--	--	CsaV3_3G014930|+	--
chr3	11136801	11136912	-	0.014272	0.119333	10	0.35097	0.23163	--	--	--	--	CsaV3_3G015010|-	--
chr3	1117183	1117362	-	0.011259	0.184347	24	0.59642	0.41207	--	--	--	--	CsaV3_3G001420|+	--
chr3	1120105	1120190	-	0.026915	0.167972	12	0.59531	0.42733	--	--	--	--	CsaV3_3G001420|+	--
chr3	11201842	11201970	-	0.0044399	0.268833	8	0.45604	0.18721	--	CsaV3_3G015100|	--	--	CsaV3_3G015110|-	--
chr3	11229060	11229228	-	0.027025	-0.130689	15	0.26769	0.39838	--	--	--	--	CsaV3_3G015120|+	CsaV3_3G015110|
chr3	11229776	11229846	-	0.00076068	-0.139148	18	0.76617	0.90531	--	--	--	--	CsaV3_3G015120|+	CsaV3_3G015110|
chr3	11232839	11232926	-	0.0067914	0.204292	8	0.60471	0.40042	--	--	--	--	CsaV3_3G015120|+	CsaV3_3G015120|
chr3	11278321	11278437	-	0.00065478	0.210692	13	0.36349	0.15279	--	--	CsaV3_3G015170.1.exon1	CsaV3_3G015180|,CsaV3_3G015170|	--	--
chr3	11317693	11317816	-	0.013095	-0.197519	9	0.42859	0.62611	--	--	--	--	CsaV3_3G015240|+	CsaV3_3G015240|
chr3	11332754	11332839	-	0.011021	0.15125	16	0.716	0.56475	--	--	--	--	CsaV3_3G015260|+	--
chr3	11332894	11332957	-	0.0011873	0.151185	9	0.69856	0.54737	--	--	--	--	CsaV3_3G015260|+	--
chr3	11337791	11337868	-	8.65e-09	0.143333	12	0.93542	0.79208	--	CsaV3_3G015260|,CsaV3_3G015270|	--	--	CsaV3_3G015280|+	--
chr3	11399420	11399470	-	0.0026522	-0.1605	10	0.5745	0.735	--	--	--	--	CsaV3_3G015330|-	--
chr3	11498668	11498754	-	0.0030417	0.114019	18	0.24228	0.12826	--	--	--	CsaV3_3G015400|	CsaV3_3G015430|+	--
chr3	11529053	11529112	-	2.2e-07	-0.175667	17	0.49955	0.67522	--	CsaV3_3G015400|	--	--	CsaV3_3G015430|+	CsaV3_3G015430|
chr3	11548171	11548280	-	3.82e-05	0.114042	16	0.9475	0.83346	--	--	--	--	CsaV3_3G015480|+	CsaV3_3G015480|,CsaV3_3G015470|
chr3	11584838	11584984	-	0.0032291	0.225089	15	0.55978	0.33469	--	--	--	--	CsaV3_3G015550|+	CsaV3_3G015540|
chr3	11606397	11606889	-	0.0051782	0.116495	31	0.43351	0.31701	--	--	--	--	CsaV3_3G015580|+	CsaV3_3G015570|
chr3	11631490	11631574	-	3.38e-07	-0.271556	9	0.16593	0.43748	--	--	--	--	CsaV3_3G015630|-	CsaV3_3G015620|
chr3	11633748	11633850	-	0.0035255	-0.137667	17	0.27067	0.40833	--	--	--	--	CsaV3_3G015630|-	--
chr3	11688566	11688642	-	8.74e-07	0.170684	19	0.70335	0.53267	--	--	--	--	CsaV3_3G015730|+	CsaV3_3G015730|
chr3	11772849	11772996	-	0.00014441	0.200611	18	0.59569	0.39507	--	CsaV3_3G015870|	--	--	CsaV3_3G015870|-	CsaV3_3G015860|
chr3	11779564	11779616	-	0.0005612	-0.140028	12	0.39831	0.53833	--	--	--	--	CsaV3_3G015880|+	CsaV3_3G015880|,CsaV3_3G015870|
chr3	11810241	11810328	-	1.56e-05	-0.165729	16	0.31298	0.47871	--	--	--	--	CsaV3_3G015900|+	CsaV3_3G015900|
chr3	11816356	11816568	-	1.67e-07	-0.226459	37	0.52984	0.7563	--	--	--	--	CsaV3_3G015910|-	--
chr3	11862109	11862242	-	0.011321	0.24675	8	0.47029	0.22354	--	CsaV3_3G015970|	--	--	CsaV3_3G015970|-	CsaV3_3G015960|
chr3	11943077	11943135	-	0.00021454	0.193722	6	0.20656	0.012833	--	--	--	--	CsaV3_3G016020|+	--
chr3	11979105	11979167	-	0.047042	0.126833	6	0.15928	0.032444	--	CsaV3_3G016040|	--	--	CsaV3_3G016040|-	--
chr3	11984702	11984775	-	0.0059737	0.225875	8	0.368	0.14212	--	--	--	--	CsaV3_3G016050|-	--
chr3	12078432	12078528	-	2.31e-07	0.166897	13	0.38882	0.22192	--	CsaV3_3G016170|	--	--	CsaV3_3G016170|-	--
chr3	12145369	12145476	-	5.71e-13	-0.1688	20	0.71085	0.87965	--	--	--	CsaV3_3G016250|	--	--
chr3	1217099	1217260	-	0.00012586	-0.109825	21	0.14086	0.25068	--	--	--	--	CsaV3_3G001600|+	--
chr3	12171581	12171648	-	0.0047641	0.151667	12	0.95406	0.80239	--	--	--	--	CsaV3_3G016290|+	--
chr3	12176927	12177025	-	9.48e-05	0.108206	21	0.70265	0.59444	--	--	--	--	CsaV3_3G016290|+	--
chr3	1219905	1219958	-	0.00060885	-0.206667	9	0.48467	0.69133	--	--	--	--	CsaV3_3G001600|+	--
chr3	1227502	1227559	-	0.0066611	-0.117667	13	0.47756	0.59523	--	--	CsaV3_3G001600.1.exon1	CsaV3_3G001600|	--	--
chr3	12315812	12315890	-	2.06e-11	0.124944	18	0.92469	0.79974	--	--	--	--	CsaV3_3G016490|+	--
chr3	12355118	12355169	-	0.00021453	-0.121333	13	0.64674	0.76808	--	--	--	--	CsaV3_3G016550|+	CsaV3_3G016550|
chr3	12362318	12362381	-	0.00086303	0.301571	7	0.81357	0.512	--	CsaV3_3G016550|	--	--	CsaV3_3G016560|+	--
chr3	12374020	12374150	-	0.00053183	-0.135889	24	0.26858	0.40447	--	--	--	--	CsaV3_3G016570|+	--
chr3	12382116	12382218	-	0.02668	0.185542	8	0.30704	0.1215	--	--	--	--	CsaV3_3G016580|+	--
chr3	12416322	12416423	-	0.0040279	0.117212	11	0.237	0.11979	--	--	--	--	CsaV3_3G016600|+	--
chr3	12419959	12420078	-	0.010907	-0.139667	5	0.025067	0.16473	--	--	--	--	CsaV3_3G016600|+	--
chr3	12453707	12453918	-	0.0098011	-0.109379	22	0.40352	0.51289	--	CsaV3_3G016630|	--	--	CsaV3_3G016640|-	--
chr3	12476366	12476419	-	6.04e-05	0.173519	9	0.89759	0.72407	--	--	--	--	CsaV3_3G016660|+	CsaV3_3G016650|
chr3	12480076	12480204	-	3.89e-05	0.202111	18	0.62107	0.41896	--	--	--	--	CsaV3_3G016660|+	--
chr3	12522104	12522178	-	4.73e-05	0.140095	14	0.22269	0.082595	--	--	--	--	CsaV3_3G016700|+	--
chr3	12543197	12543249	-	3.98e-07	0.229567	10	0.4665	0.23693	--	CsaV3_3G016740|	--	--	CsaV3_3G016750|+	CsaV3_3G016750|
chr3	12543596	12543862	-	0.0028355	0.142788	22	0.542	0.39921	--	--	--	--	CsaV3_3G016750|+	CsaV3_3G016750|
chr3	12589672	12589750	-	0.018045	-0.102389	6	0.098389	0.20078	--	--	--	--	CsaV3_3G016800|+	--
chr3	12593356	12593432	-	0.014519	0.176905	7	0.27624	0.099333	--	--	--	--	CsaV3_3G016800|+	--
chr3	12619973	12620085	-	0.027466	0.158697	11	0.60491	0.44621	--	--	--	--	CsaV3_3G016820|+	CsaV3_3G016810|
chr3	12634475	12634548	-	0.015621	0.208111	12	0.75631	0.54819	--	--	--	--	CsaV3_3G016840|-	CsaV3_3G016830|
chr3	12652914	12653001	-	0.00054368	0.105389	12	0.15294	0.047556	--	--	--	CsaV3_3G016870|	--	--
chr3	12683102	12683166	-	0.025196	0.129708	8	0.33862	0.20892	--	CsaV3_3G016920|	--	--	CsaV3_3G016930|-	--
chr3	12727707	12727811	-	0.0019053	0.168982	19	0.84367	0.67468	--	--	--	--	CsaV3_3G016940|+	--
chr3	12759137	12759217	-	0.024166	-0.279333	7	0.32371	0.60305	--	CsaV3_3G016980|	--	--	CsaV3_3G016980|-	--
chr3	12805008	12805101	-	0.00055007	0.107778	12	0.8665	0.75872	--	CsaV3_3G017080|	--	CsaV3_3G017070|	--	--
chr3	12810908	12811034	-	0.0056456	0.138375	16	0.30792	0.16954	--	--	--	CsaV3_3G017090|	--	--
chr3	12830520	12830599	-	0.020455	-0.137704	9	0.14759	0.2853	--	CsaV3_3G017140|	--	--	CsaV3_3G017140|-	CsaV3_3G017130|
chr3	12871963	12872055	-	3.04e-05	0.14575	20	0.65592	0.51017	--	--	--	--	CsaV3_3G017190|+	--
chr3	13014261	13014414	-	9.97e-06	0.174644	29	0.87255	0.69791	--	--	--	--	CsaV3_3G017360|+	CsaV3_3G017360|
chr3	13031236	13031372	-	7.04e-09	-0.168111	18	0.12076	0.28887	--	--	--	--	CsaV3_3G017390|-	CsaV3_3G017380|
chr3	13043461	13043541	-	8.19e-06	0.208417	20	0.8109	0.60248	--	--	--	--	CsaV3_3G017400|+	--
chr3	13050498	13050583	-	0.039948	-0.211083	8	0.43858	0.64967	--	CsaV3_3G017400|	--	--	CsaV3_3G017410|+	CsaV3_3G017420|,CsaV3_3G017410|
chr3	13080489	13080899	-	0.016553	0.173606	22	0.50752	0.33391	--	--	--	--	CsaV3_3G017460|-	--
chr3	1313053	1313171	-	0.0020183	-0.161921	21	0.38506	0.54698	--	CsaV3_3G001750|	--	--	CsaV3_3G001750|-	CsaV3_3G001740|
chr3	13189262	13189473	-	0.0038412	0.114603	21	0.25262	0.13802	--	--	--	--	CsaV3_3G017620|-	--
chr3	13258780	13258857	-	0.011351	0.1568	5	0.29827	0.14147	--	--	--	CsaV3_3G017650|	--	--
chr3	13297792	13297891	-	8.13e-05	0.19575	12	0.76144	0.56569	--	--	--	--	CsaV3_3G017720|-	CsaV3_3G017710|
chr3	13325136	13325197	-	0.002269	0.152702	19	0.62614	0.47344	--	--	--	--	CsaV3_3G017750|-	CsaV3_3G017740|
chr3	13376841	13376893	-	0.0145	-0.213238	7	0.63743	0.85067	--	--	--	--	CsaV3_3G017810|-	CsaV3_3G017800|
chr3	13380334	13380582	-	0.0002459	0.185318	22	0.61648	0.43117	--	--	--	--	CsaV3_3G017810|-	--
chr3	13475419	13475562	-	0.0026927	-0.183017	20	0.31192	0.49493	--	--	--	--	CsaV3_3G017860|-	--
chr3	13501734	13501786	-	1.47e-10	-0.251792	16	0.67944	0.93123	--	--	--	--	CsaV3_3G017880|-	CsaV3_3G017870|
chr3	13503153	13503205	-	0.00015844	0.162544	19	0.91104	0.74849	--	--	--	--	CsaV3_3G017880|-	CsaV3_3G017870|
chr3	13505006	13505124	-	0.0030213	0.253333	12	0.57069	0.31736	--	--	--	--	CsaV3_3G017880|-	--
chr3	13508272	13508351	-	1.37e-10	-0.189667	16	0.69815	0.88781	--	--	--	--	CsaV3_3G017880|-	--
chr3	13518094	13518241	-	0.00044292	-0.158944	24	0.56885	0.72779	--	--	--	--	CsaV3_3G017880|-	--
chr3	13520049	13520141	-	0.018045	0.143667	8	0.2695	0.12583	--	--	--	--	CsaV3_3G017880|-	--
chr3	13580467	13580519	-	0.001136	0.126083	12	0.91744	0.79136	--	--	--	--	CsaV3_3G017930|+	--
chr3	13589863	13589951	-	0.03342	0.109639	12	0.44192	0.33228	--	--	--	--	CsaV3_3G017930|+	--
chr3	13593163	13593624	-	0.027466	-0.142542	16	0.43015	0.57269	--	--	--	--	CsaV3_3G017930|+	--
chr3	13607882	13607947	-	0.03242	0.179905	14	0.54374	0.36383	--	--	--	--	CsaV3_3G017940|-	--
chr3	13608949	13609039	-	2.07e-05	0.228815	18	0.62733	0.39852	--	--	--	--	CsaV3_3G017940|-	--
chr3	13611047	13611134	-	8.42e-15	0.1362	25	0.99161	0.85541	--	--	--	--	CsaV3_3G017940|-	--
chr3	13612087	13612147	-	0.0012445	0.25125	8	0.45025	0.199	--	--	--	--	CsaV3_3G017940|-	--
chr3	13646425	13646526	-	8.63e-10	0.110146	41	0.73002	0.61988	CsaV3_3G017940.1.cds1	--	CsaV3_3G017940.1.exon1	CsaV3_3G017940|	--	--
chr3	13674445	13674637	-	0.014482	0.134018	19	0.5173	0.38328	--	--	--	--	CsaV3_3G017970|+	CsaV3_3G017970|
chr3	13677959	13678009	-	0.0041021	-0.173033	10	0.097833	0.27087	--	--	--	CsaV3_3G017970|	--	--
chr3	13716916	13717045	-	0.0017616	-0.115781	32	0.33696	0.45274	--	--	--	--	CsaV3_3G018020|+	--
chr3	13770853	13770951	-	0.00011909	0.217533	10	0.6693	0.45177	--	--	--	--	CsaV3_3G018040|+	CsaV3_3G018040|
chr3	13771416	13771576	-	0.023901	0.12249	17	0.69863	0.57614	--	--	--	--	CsaV3_3G018040|+	CsaV3_3G018040|
chr3	1378228	1378597	-	1.42e-05	0.155944	18	0.77837	0.62243	--	--	--	--	CsaV3_3G001840|-	--
chr3	13849036	13849124	-	0.005102	0.109444	9	0.14422	0.034778	--	--	--	--	CsaV3_3G018090|+	--
chr3	13850619	13850850	-	0.013716	0.139513	26	0.74478	0.60527	--	--	--	--	CsaV3_3G018090|+	--
chr3	13903469	13903582	-	0.00021029	0.183178	15	0.42189	0.23871	--	--	--	--	CsaV3_3G018150|-	--
chr3	13904933	13905034	-	0.03791	0.155722	12	0.77831	0.62258	--	--	--	--	CsaV3_3G018150|-	--
chr3	13913304	13913430	-	0.047042	-0.186111	6	0.40467	0.59078	--	CsaV3_3G018150|	--	--	CsaV3_3G018150|-	--
chr3	13920118	13920178	-	0.0050895	-0.165286	7	0.46233	0.62762	--	--	--	--	CsaV3_3G018160|+	CsaV3_3G018160|
chr3	13927728	13927807	-	0.0047721	-0.11075	12	0.13286	0.24361	--	--	--	--	CsaV3_3G018180|+	CsaV3_3G018170|
chr3	13947627	13947697	-	0.028466	0.229444	9	0.39352	0.16407	--	CsaV3_3G018190|	--	--	CsaV3_3G018200|-	--
chr3	14029704	14029783	-	3.95e-08	0.267929	14	0.70686	0.43893	--	--	--	--	CsaV3_3G018310|+	--
chr3	14089882	14090024	-	0.0091985	-0.10213	18	0.095685	0.19781	--	--	--	--	CsaV3_3G018370|+	CsaV3_3G018360|
chr3	14093196	14093475	-	0.0050004	-0.144608	17	0.62394	0.76855	--	--	--	--	CsaV3_3G018370|+	--
chr3	14094874	14094980	-	0.0045109	0.139139	12	0.34739	0.20825	--	--	--	--	CsaV3_3G018370|+	--
chr3	14129645	14129715	-	0.0094608	-0.2169	10	0.42373	0.64063	--	--	--	--	CsaV3_3G018410|+	CsaV3_3G018420|,CsaV3_3G018410|
chr3	14145835	14145911	-	0.028466	0.106152	11	0.365	0.25885	--	--	--	--	CsaV3_3G018440|-	--
chr3	14192126	14192193	-	0.00042454	-0.160963	18	0.40383	0.5648	--	CsaV3_3G018460|	--	--	CsaV3_3G018470|-	--
chr3	14215152	14215244	-	0.033991	0.127524	7	0.2441	0.11657	--	--	--	--	CsaV3_3G018490|+	--
chr3	14311440	14311517	-	0.0011052	0.103808	26	0.9274	0.82359	--	CsaV3_3G018580|	--	--	CsaV3_3G018590|+	CsaV3_3G018590|
chr3	14325588	14325897	-	0.047042	0.152778	6	0.24256	0.089778	--	--	--	--	CsaV3_3G018610|-	CsaV3_3G018600|
chr3	14350769	14350823	-	0.027466	-0.168708	16	0.57294	0.74165	--	--	--	CsaV3_3G018630|	--	--
chr3	14382685	14382803	-	0.001262	-0.147354	16	0.75069	0.89804	--	CsaV3_3G018660|	--	--	CsaV3_3G018670|-	--
chr3	14499651	14499787	-	8.1e-14	-0.150924	22	0.072545	0.22347	--	--	--	--	CsaV3_3G018800|-	--
chr3	14508725	14508778	-	0.020379	-0.195074	9	0.73493	0.93	--	CsaV3_3G018800|	--	--	CsaV3_3G018800|-	--
chr3	14566529	14566695	-	0.0043301	0.231458	8	0.64833	0.41687	--	--	--	--	CsaV3_3G018900|+	CsaV3_3G018900|
chr3	14572118	14572414	-	0.00069398	0.166193	19	0.36911	0.20291	--	--	--	--	CsaV3_3G018910|+	--
[truncated: 4,540 more rows]

## Sheet: Table S2
Table S2 Combined analysis of differentially methylated regions (DMRs) and differentially expressed genes (DEGs) between FNLs and NFNLs.
gene ID	chh-regulated	chr	start	end		q-value	methyl-diff	CpGs	FNL	NFNL	cds	downstream 2kb	exon	gene body	intergenic("+"forward,"-"reverse)	upstream 2kb	mRNA-regulated	COG_class	COG_class_annotation	GO_annotation	KEGG_annotation	KEGG_pathway_annotation	KOG_class	KOG_class_annotation	Pfam_annotation	Swiss-Prot_annotation	eggNOG_class	eggNOG_class_annotation	NR_annotation
CsaV3_1G003920	down	chr1	2425464	2425515	-	0.0067336	-0.125352	18	0.7745	0.89985	--	--	--	--	CsaV3_1G003920|+	CsaV3_1G003910|	up	--	--	Molecular Function: DNA binding (GO:0003677);;	K09422|7.6e-147|csv:101209599|K09422 transcription factor MYB, plant | (RefSeq) transcription factor MYB62	--	[K]	Transcription	Myb-like DNA-binding domain	Transcription factor MYB2 OS=Oryza sativa subsp. japonica OX=39947 GN=MYB2 PE=2 SV=1	--	--	transcription factor MYB62 [Cucumis sativus]
CsaV3_1G003920	down	chr1	2431021	2431154	-	1.92e-05	-0.158842	19	0.70795	0.86679	--	--	--	--	CsaV3_1G003920|+	CsaV3_1G003920|	up
CsaV3_1G005840	up	chr1	3741169	3741309	-	2.14e-13	0.156694	24	0.45682	0.30012	--	CsaV3_1G005860|	--	--	CsaV3_1G005860|-	CsaV3_1G005840|,CsaV3_1G005850|	up	--	--	Molecular Function: calmodulin binding (GO:0005516);;	--	--	--	--	Calmodulin binding protein-like	--	--	--	hypothetical protein Csa_014361 [Cucumis sativus]
CsaV3_1G007520	up	chr1	4779569	4779679	-	9.58e-06	0.154712	22	0.43468	0.27997	--	--	--	--	CsaV3_1G007520|+	CsaV3_1G007520|	up	[Q]	Secondary metabolites biosynthesis, transport and catabolism	Molecular Function: alditol:NADP+ 1-oxidoreductase activity (GO:0004032);; Cellular Component: cytosol (GO:0005829);; Molecular Function: alcohol dehydrogenase (NADP+) activity (GO:0008106);; Molecular Function: oxidoreductase activity (GO:0016491);;	K00002|2.8e-113|tcc:18605342|K00002 alcohol dehydrogenase (NADP+) [EC:1.1.1.2] | (RefSeq) aldo-keto reductase family 4 member C9	Glycolysis / Gluconeogenesis (ko00010);; Pentose and glucuronate interconversions (ko00040);; Glycerolipid metabolism (ko00561)	[R]	General function prediction only	Aldo/keto reductase family	NADPH-dependent aldo-keto reductase, chloroplastic OS=Arabidopsis thaliana OX=3702 GN=AKR4C9 PE=1 SV=1	S	Function unknown	NADPH-dependent aldo-keto reductase, chloroplastic [Cucumis sativus]
CsaV3_1G007770	up	chr1	4929321	4929430	-	0.0015347	0.218125	8	0.59467	0.37654	--	--	--	--	CsaV3_1G007770|+	CsaV3_1G007770|	up	[QV]	Secondary metabolites biosynthesis, transport and catabolism;; Defense mechanisms	Molecular Function: monooxygenase activity (GO:0004497);; Molecular Function: iron ion binding (GO:0005506);; Biological Process: multicellular organism development (GO:0007275);; Biological Process: brassinosteroid homeostasis (GO:0010268);; Biological Process: sterol metabolic process (GO:0016125);; Biological Process: brassinosteroid biosynthetic process (GO:0016132);; Molecular Function: oxid…	K07437|2.4e-132|qsu:112027775|K07437 cytochrome P450 family 26 subfamily A | (RefSeq) cytochrome P450 87A3-like	--	[QI]	Secondary metabolites biosynthesis, transport and catabolism;; Lipid transport and metabolism	Cytochrome P450	Cytochrome P450 87A3 OS=Oryza sativa subsp. japonica OX=39947 GN=CYP87A3 PE=2 SV=3	Q	Secondary metabolites biosynthesis, transport and catabolism	uncharacterized protein LOC101213710 [Cucumis sativus]
CsaV3_1G009750	down	chr1	6023945	6024009	-	0.00061187	-0.116	15	0.85902	0.97502	--	--	--	--	CsaV3_1G009750|+	CsaV3_1G009740|	down	--	--	Molecular Function: RNA polymerase II regulatory region sequence-specific DNA binding (GO:0000977);; Molecular Function: transcription factor activity, sequence-specific DNA binding (GO:0003700);; Cellular Component: nucleus (GO:0005634);; Biological Process: positive regulation of transcription from RNA polymerase II promoter (GO:0045944);; Molecular Function: protein dimerization activity (GO:0…	K09264|2.5e-107|csv:101222812|K09264 MADS-box transcription factor, plant | (RefSeq) ERAF17; truncated transcription factor CAULIFLOWER D	--	[K]	Transcription	SRF-type transcription factor (DNA-binding and dimerisation domain)	MADS-box transcription factor 6 OS=Oryza sativa subsp. japonica OX=39947 GN=MADS6 PE=1 SV=1	K	Transcription	truncated transcription factor CAULIFLOWER D [Cucumis sativus]
CsaV3_1G013850	down	chr1	9159548	9159627	-	0.020972	-0.18925	12	0.19106	0.38031	--	--	--	--	CsaV3_1G013850|+	--	up	[P]	Inorganic ion transport and metabolism	Molecular Function: carbonate dehydratase activity (GO:0004089);; Biological Process: one-carbon metabolic process (GO:0006730);; Molecular Function: zinc ion binding (GO:0008270);; Molecular Function: hydro-lyase activity (GO:0016836);;	K01674|2.7e-157|csv:101221989|K01674 carbonic anhydrase [EC:4.2.1.1] | (RefSeq) alpha carbonic anhydrase 7	Nitrogen metabolism (ko00910)	[R]	General function prediction only	Eukaryotic-type carbonic anhydrase	Alpha carbonic anhydrase 7 OS=Arabidopsis thaliana OX=3702 GN=ACA7 PE=2 SV=1	P	Inorganic ion transport and metabolism	alpha carbonic anhydrase 7 [Cucumis sativus]
CsaV3_1G013850	up	chr1	9163746	9163803	-	0.024166	0.227905	7	0.68914	0.46124	--	--	--	--	CsaV3_1G013850|+	--	up
CsaV3_1G017280	up	chr1	11822283	11822403	-	0.041267	0.103561	22	0.77852	0.67495	--	--	--	--	CsaV3_1G017280|+	--	up	[G]	Carbohydrate transport and metabolism	Molecular Function: hydrolase activity, hydrolyzing O-glycosyl compounds (GO:0004553);; Cellular Component: cell wall (GO:0005618);; Biological Process: xyloglucan metabolic process (GO:0010411);; Cellular Component: integral component of membrane (GO:0016021);; Molecular Function: xyloglucan:xyloglucosyl transferase activity (GO:0016762);; Biological Process: cell wall biogenesis (GO:0042546);; …	K08235|4.0e-132|csv:101219554|K08235 xyloglucan:xyloglucosyl transferase [EC:2.4.1.207] | (RefSeq) probable xyloglucan endotransglucosylase/hydrolase protein 7	--	--	--	Glycosyl hydrolases family 16	Probable xyloglucan endotransglucosylase/hydrolase protein 7 OS=Arabidopsis thaliana OX=3702 GN=XTH7 PE=2 SV=2	G	Carbohydrate transport and metabolism	hypothetical protein Csa_013009 [Cucumis sativus]
CsaV3_1G017280	down	chr1	11828605	11828935	-	0.0032679	-0.161905	14	0.21895	0.38086	--	--	--	--	CsaV3_1G017280|+	--	up
CsaV3_1G017280	down	chr1	11830267	11830674	-	1.18e-05	-0.147479	32	0.53759	0.68507	--	--	--	--	CsaV3_1G017280|+	--	up
CsaV3_1G017280	up	chr1	11833396	11833503	-	0.000319	0.163222	15	0.87902	0.7158	--	--	--	--	CsaV3_1G017280|+	CsaV3_1G017280|	up
CsaV3_1G022930	down	chr1	13280504	13280738	-	0.01991	-0.129635	32	0.37854	0.50818	--	--	--	--	CsaV3_1G022930|-	CsaV3_1G022920|	down	[R]	General function prediction only	Molecular Function: protein binding (GO:0005515);;	K10570|2.9e-10|qsu:112009679|K10570 DNA excision repair protein ERCC-8 | (RefSeq) DNA excision repair protein ckn1-like	Nucleotide excision repair (ko03420);; Ubiquitin mediated proteolysis (ko04120)	--	--	WD domain, G-beta repeat	--	S	Function unknown	uncharacterized WD repeat-containing protein C2A9.03 isoform X1 [Cucumis sativus]
CsaV3_1G022930	down	chr1	13300313	13300379	-	0.027466	-0.123708	8	0.77692	0.90062	--	--	--	--	CsaV3_1G022940|-	CsaV3_1G022930|	down
CsaV3_1G028400	up	chr1	15433672	15433761	-	0.0051742	0.146	9	0.57659	0.43059	--	--	--	--	CsaV3_1G028410|+	CsaV3_1G028400|	down	[P]	Inorganic ion transport and metabolism	Molecular Function: N,N-dimethylaniline monooxygenase activity (GO:0004499);; Molecular Function: flavin adenine dinucleotide binding (GO:0050660);; Molecular Function: NADP binding (GO:0050661);;	K11816|2.8e-17|pxb:103955340|K11816 indole-3-pyruvate monooxygenase [EC:1.14.13.168] | (RefSeq) probable indole-3-pyruvate monooxygenase YUCCA3	Tryptophan metabolism (ko00380)	[Q]	Secondary metabolites biosynthesis, transport and catabolism	Flavin-binding monooxygenase-like	Probable flavin-containing monooxygenase 1 OS=Arabidopsis thaliana OX=3702 GN=FMO1 PE=2 SV=1	Q	Secondary metabolites biosynthesis, transport and catabolism	probable flavin-containing monooxygenase 1 [Cucumis sativus]
CsaV3_1G028840	up	chr1	15762134	15762237	-	1.19e-09	0.199667	14	0.51167	0.312	--	--	--	--	CsaV3_1G028840|-		up	--	--	Cellular Component: endoplasmic reticulum membrane (GO:0005789);; Cellular Component: integral component of membrane (GO:0016021);;	K20720|4.5e-276|csv:101211361|K20720 reticulon-4 | (RefSeq) reticulon-like protein B21 isoform X2	--	--	--	Reticulon	Reticulon-like protein B21 OS=Arabidopsis thaliana OX=3702 GN=RTNLB21 PE=2 SV=2	S	Function unknown	reticulon-like protein B21 isoform X2 [Cucumis sativus]
CsaV3_1G029010	down	chr1	15873138	15873222	-	0.001528	-0.168578	15	0.44071	0.60929	--	--	--	--	CsaV3_1G029010|+	--	up	[E]	Amino acid transport and metabolism	Molecular Function: serine-type carboxypeptidase activity (GO:0004185);; Cellular Component: extracellular space (GO:0005615);; Biological Process: brassinosteroid mediated signaling pathway (GO:0009742);; Biological Process: proteolysis involved in cellular protein catabolic process (GO:0051603);;	K16297|3.9e-284|csv:101208732|K16297 serine carboxypeptidase-like clade II [EC:3.4.16.-] | (RefSeq) serine carboxypeptidase 24	--	[OE]	Posttranslational modification, protein turnover, chaperones;; Amino acid transport and metabolism	Serine carboxypeptidase	Serine carboxypeptidase 24 OS=Arabidopsis thaliana OX=3702 GN=SCPL24 PE=1 SV=1	O	Posttranslational modification, protein turnover, chaperones	serine carboxypeptidase 24 [Cucumis sativus]
CsaV3_1G031040	up	chr1	18153188	18153312	-	0.00084722	0.161576	11	0.43179	0.27021	--	--	--	--	CsaV3_1G031040|+	--	down	--	--	Molecular Function: DNA binding (GO:0003677);; Cellular Component: nucleus (GO:0005634);;	K14491|3.4e-11|csat:104732025|K14491 two-component response regulator ARR-B family | (RefSeq) two-component response regulator ARR2-like isoform X1	Plant hormone signal transduction (ko04075)	--	--	Myb-like DNA-binding domain	Myb family transcription factor EFM OS=Arabidopsis thaliana OX=3702 GN=EFM PE=1 SV=2	K	Transcription	myb family transcription factor EFM [Cucumis sativus]
CsaV3_1G031130	up	chr1	18320602	18320834	-	0.027466	0.154923	13	0.55133	0.39641	--	--	--	--	CsaV3_1G031130|+	--	up	[Q]	Secondary metabolites biosynthesis, transport and catabolism	Biological Process: fatty acid biosynthetic process (GO:0006633);; Cellular Component: integral component of membrane (GO:0016021);; Molecular Function: transferase activity, transferring acyl groups other than amino-acyl groups (GO:0016747);;	K15397|1.5e-297|csv:101213684|K15397 3-ketoacyl-CoA synthase [EC:2.3.1.199] | (RefSeq) 3-ketoacyl-CoA synthase 11	Fatty acid elongation (ko00062);; Plant-pathogen interaction (ko04626)	--	--	FAE1/Type III polyketide synthase-like protein	3-ketoacyl-CoA synthase 11 OS=Arabidopsis thaliana OX=3702 GN=KCS11 PE=1 SV=1	I	Lipid transport and metabolism	3-ketoacyl-CoA synthase 11 [Cucumis sativus]
CsaV3_1G031130	up	chr1	18321534	18321587	-	1.96e-05	0.316194	12	0.57575	0.25956	--	--	--	--	CsaV3_1G031130|+	--	up
CsaV3_1G031130	up	chr1	18346246	18346357	-	0.029278	0.180027	25	0.789	0.60897	--	--	--	--	CsaV3_1G031130|+	--	up
CsaV3_1G031130	down	chr1	18347058	18347111	-	0.0026913	-0.185167	10	0.15667	0.34183	--	--	--	--	CsaV3_1G031130|+	--	up
CsaV3_1G032430	up	chr1	19437937	19438013	-	0.04282	0.111233	10	0.82737	0.71613	--	CsaV3_1G032420|	--	--	CsaV3_1G032430|-	--	up	[Q]	Secondary metabolites biosynthesis, transport and catabolism	Biological Process: response to light stimulus (GO:0009416);; Biological Process: gibberellin catabolic process (GO:0045487);; Molecular Function: metal ion binding (GO:0046872);; Molecular Function: dioxygenase activity (GO:0051213);; Molecular Function: C-19 gibberellin 2-beta-dioxygenase activity (GO:0052634);;	K04125|2.3e-198|csv:101214915|K04125 gibberellin 2beta-dioxygenase [EC:1.14.11.13] | (RefSeq) gibberellin 2-beta-dioxygenase-like	Diterpenoid biosynthesis (ko00904)	[QR]	Secondary metabolites biosynthesis, transport and catabolism;; General function prediction only	2OG-Fe(II) oxygenase superfamily	Gibberellin 2-beta-dioxygenase OS=Phaseolus coccineus OX=3886 GN=GA2OX1 PE=2 SV=1	Q	Secondary metabolites biosynthesis, transport and catabolism	gibberellin 2-beta-dioxygenase-like [Cucumis sativus]
CsaV3_1G032910	down	chr1	19983991	19984059	-	0.002633	-0.1589	10	0.16817	0.32707	--	--	CsaV3_1G032910.1.exon5	CsaV3_1G032910|,CsaV3_1G032920|	--	--	up	[IR]	Lipid transport and metabolism;; General function prediction only	Cellular Component: integral component of membrane (GO:0016021);; Molecular Function: hydrolase activity, acting on ester bonds (GO:0016788);;	K00679|3.1e-48|cic:CICLE_v10027727mg|K00679 phospholipid:diacylglycerol acyltransferase [EC:2.3.1.158] | (RefSeq) hypothetical protein	Glycerolipid metabolism (ko00561)	--	--	GDSL-like Lipase/Acylhydrolase	GDSL esterase/lipase At1g29670 OS=Arabidopsis thaliana OX=3702 GN=At1g29670 PE=2 SV=1	L	Replication, recombination and repair	hypothetical protein Csa_019793 [Cucumis sativus]
CsaV3_1G032910	down	chr1	19984377	19984491	-	0.0031326	-0.152437	16	0.30227	0.45471	--	CsaV3_1G032910|	--	CsaV3_1G032920|	--	--	up
CsaV3_1G032910	up	chr1	19984559	19984699	-	0.025805	0.182333	14	0.59786	0.41552	--	CsaV3_1G032910|	--	CsaV3_1G032920|	--	--	up
CsaV3_1G036600	down	chr1	22473552	22473661	-	0.006768	-0.125972	12	0.4095	0.53547	--	CsaV3_1G036610|	--	--	CsaV3_1G036610|-	CsaV3_1G036600|	down	--	--	Molecular Function: oxidoreductase activity (GO:0016491);;	K01166|1.5e-23|gra:105775724|K01166 ribonuclease T2 [EC:4.6.1.19] | (RefSeq) ribonuclease 1-like	--	[O]	Posttranslational modification, protein turnover, chaperones	Gamma interferon inducible lysosomal thiol reductase (GILT)	--	O	Posttranslational modification, protein turnover, chaperones	gamma-interferon-responsive lysosomal thiol protein [Cucumis sativus]
CsaV3_1G036950	down	chr1	22863828	22863954	-	4.46e-06	-0.105872	13	0.10715	0.21303	--	--	--	--	CsaV3_1G036950|+	CsaV3_1G036950|	down
CsaV3_1G036950	up	chr1	22865173	22865382	-	1.71e-08	0.124211	30	0.77567	0.65146	--	CsaV3_1G036960|	--	--	CsaV3_1G036950|+	CsaV3_1G036950|	down
CsaV3_1G037550	down	chr1	23477269	23477392	-	0.042465	-0.245593	9	0.13807	0.38367	--	--	--	--	CsaV3_1G037550|-	--	up	--	--	Cellular Component: nucleus (GO:0005634);; Cellular Component: cytosol (GO:0005829);; Cellular Component: plasma membrane (GO:0005886);; Biological Process: cellular response to auxin stimulus (GO:0071365);; Biological Process: protein localization involved in auxin polar transport (GO:1901703);;	K19996|2.0e-118|atr:18449038|K19996 phosphatidylinositol transfer protein SFH5 | (RefSeq) patellin-3	--	[I]	Lipid transport and metabolism	CRAL/TRIO domain	Patellin-4 OS=Arabidopsis thaliana OX=3702 GN=PATL4 PE=1 SV=2	I	Lipid transport and metabolism	patellin-4 [Cucumis sativus]
CsaV3_1G038540	up	chr1	24263207	24263290	-	0.0085504	0.158909	11	0.47803	0.31912	--	CsaV3_1G038530|	--	CsaV3_1G038520|	CsaV3_1G038540|-	--	down	--	--	Molecular Function: calmodulin binding (GO:0005516);;	--	--	--	--	Calmodulin binding protein-like	Calmodulin-binding protein 60 C OS=Arabidopsis thaliana OX=3702 GN=CBP60C PE=2 SV=1	S	Function unknown	calmodulin-binding protein 60 C [Cucumis sativus]
CsaV3_1G039120	up	chr1	24622443	24622562	-	0.00058463	0.178611	24	0.82707	0.64846	--	--	--	CsaV3_1G039120|	--	--	down	[IQR]	Lipid transport and metabolism;; Secondary metabolites biosynthesis, transport and catabolism;; General function prediction only	Cellular Component: cytosol (GO:0005829);; Biological Process: folic acid-containing compound metabolic process (GO:0006760);; Molecular Function: oxidoreductase activity, acting on the CH-OH group of donors, NAD or NADP as acceptor (GO:0016616);; Biological Process: oxidation-reduction process (GO:0055114);;	K00059|3.3e-16|gsl:Gasu_60850|K00059 3-oxoacyl-[acyl-carrier protein] reductase [EC:1.1.1.100] | (RefSeq) 3-oxoacyl-[acyl-carrier-protein] reductase	Fatty acid biosynthesis (ko00061);; Biotin metabolism (ko00780);; Fatty acid metabolism (ko01212)	[R]	General function prediction only	short chain dehydrogenase	NADPH-dependent pterin aldehyde reductase OS=Arabidopsis thaliana OX=3702 GN=At1g10310 PE=1 SV=1	Q	Secondary metabolites biosynthesis, transport and catabolism	NADPH-dependent pterin aldehyde reductase [Cucumis sativus]
CsaV3_1G039370	up	chr1	24815386	24815453	-	0.035135	0.254286	7	0.86967	0.61538	--	--	--	--	CsaV3_1G039370|-	CsaV3_1G039360|	up	--	--	Cellular Component: nucleosome (GO:0000786);; Molecular Function: DNA binding (GO:0003677);; Cellular Component: nucleus (GO:0005634);; Molecular Function: protein heterodimerization activity (GO:0046982);;	K11251|6.7e-71|cmo:103492212|K11251 histone H2A | (RefSeq) histone H2AX	--	[B]	Chromatin structure and dynamics	C-terminus of histone H2A	Probable histone H2AXb OS=Arabidopsis thaliana OX=3702 GN=At1g54690 PE=1 SV=1	B	Chromatin structure and dynamics	hypothetical protein Csa_007458 [Cucumis sativus]
CsaV3_1G039370	down	chr1	24817221	24817273	-	0.013711	-0.107133	10	0.3196	0.42673	--	--	--	--	CsaV3_1G039370|-	--	up
CsaV3_1G040310	down	chr1	25568815	25568935	-	0.032895	-0.144548	14	0.1941	0.33864	--	--	--	--	CsaV3_1G040310|+	--	down	--	--	Cellular Component: integral component of membrane (GO:0016021);;	--	--	--	--	Tetraspanin family	Tetraspanin-2 OS=Arabidopsis thaliana OX=3702 GN=TET2 PE=2 SV=1	S	Function unknown	tetraspanin-2 [Cucumis sativus]
CsaV3_1G040530	down	chr1	25790476	25790555	-	0.0021838	-0.175139	12	0.33919	0.51433	--	--	--	--	CsaV3_1G040530|-	--	down	--	--	Cellular Component: integral component of membrane (GO:0016021);;	--	--	--	--	Cotton fibre expressed protein	Pathogen-associated molecular patterns-induced protein A70 OS=Arabidopsis thaliana OX=3702 GN=A70 PE=1 SV=1	S	Function unknown	pathogen-associated molecular patterns-induced protein A70 [Cucumis sativus]
CsaV3_1G040530	up	chr1	25791776	25791874	-	8.76e-05	0.233515	11	0.90921	0.6757	--	--	--	--	CsaV3_1G040530|-	--	down
CsaV3_1G040980	up	chr1	26090546	26090598	-	0.010827	0.112533	5	0.13553	0.023	--	--	--	--	CsaV3_1G040980|+	CsaV3_1G040970|	up	--	--	Cellular Component: cell wall (GO:0005618);; Molecular Function: manganese ion binding (GO:0030145);; Cellular Component: extracellular matrix (GO:0031012);; Molecular Function: nutrient reservoir activity (GO:0045735);; Cellular Component: apoplast (GO:0048046);;	--	--	--	--	Cupin	Auxin-binding protein ABP19a OS=Prunus persica OX=3760 GN=ABP19A PE=3 SV=1	S	Function unknown	auxin-binding protein ABP19a [Cucumis sativus]
CsaV3_1G040980	up	chr1	26098426	26098525	-	0.0022952	0.223564	13	0.39564	0.17208	--	CsaV3_1G040980|	--	--	CsaV3_1G040990|+	CsaV3_1G040990|	up
CsaV3_1G041430	down	chr1	26388369	26388448	-	0.020573	-0.110444	12	0.17714	0.28758	--	--	--	--	CsaV3_1G041440|+	CsaV3_1G041430|	up	[L]	Replication, recombination and repair	Molecular Function: recombinase activity (GO:0000150);; Biological Process: DNA recombinase assembly (GO:0000730);; Cellular Component: condensed nuclear chromosome (GO:0000794);; Molecular Function: double-stranded DNA binding (GO:0003690);; Molecular Function: single-stranded DNA binding (GO:0003697);; Molecular Function: ATP binding (GO:0005524);; Biological Process: mitotic recombination (GO:…	K04482|7.0e-187|cmo:103492402|K04482 DNA repair protein RAD51 | (RefSeq) DNA repair protein RAD51 homolog	Homologous recombination (ko03440)	[L]	Replication, recombination and repair	Rad51	DNA repair protein RAD51 homolog OS=Solanum lycopersicum OX=4081 GN=RAD51 PE=2 SV=1	L	Replication, recombination and repair	DNA repair protein RAD51 homolog [Cucumis sativus]
CsaV3_1G042600	up	chr1	27530303	27530415	-	0.039988	0.159444	15	0.42776	0.26831	--	--	--	--	CsaV3_1G042590|+	CsaV3_1G042600|,CsaV3_1G042590|	down	[J]	Translation, ribosomal structure and biogenesis	Molecular Function: methyltransferase activity (GO:0008168);; Biological Process: methylation (GO:0032259);;	K10277|1.1e-245|csv:101210592|K10277 lysine-specific demethylase 8 [EC:1.14.11.27] | (RefSeq) lysine-specific demethylase JMJ30 isoform X1	--	[BT]	Chromatin structure and dynamics;; Signal transduction mechanisms	Cupin-like domain	Lysine-specific demethylase JMJ30 OS=Arabidopsis thaliana OX=3702 GN=JMJ30 PE=1 SV=1	--	--	lysine-specific demethylase JMJ30 isoform X1 [Cucumis sativus]
CsaV3_1G043610	up	chr1	28596698	28596790	-	1.96e-09	0.151012	27	0.88159	0.73058	--	--	--	CsaV3_1G043610|	--	--	up	--	--	--	--	--	[MW]	Cell wall/membrane/envelope biogenesis;; Extracellular structures	Fasciclin domain	Fasciclin-like arabinogalactan protein 17 OS=Arabidopsis thaliana OX=3702 GN=FLA17 PE=2 SV=1	--	--	fasciclin-like arabinogalactan protein 17 [Cucumis sativus]
CsaV3_1G045230	down	chr1	30920745	30920949	-	0.0047397	-0.201356	15	0.48311	0.68447	--	--	--	--	CsaV3_1G045230|+	CsaV3_1G045230|	up	[T]	Signal transduction mechanisms	Biological Process: regulation of protein phosphorylation (GO:0001932);; Molecular Function: molecular_function (GO:0003674);; Cellular Component: cellular_component (GO:0005575);; Cellular Component: cell wall (GO:0005618);; Cellular Component: cell (GO:0005623);; Biological Process: biological_process (GO:0008150);; Cellular Component: plant-type cell wall (GO:0009505);; Molecular Function: kin…	--	--	[C]	Energy production and conversion	CBS domain	SNF1-related protein kinase regulatory subunit gamma-1 OS=Arabidopsis thaliana OX=3702 GN=KING1 PE=1 SV=2	C	Energy production and conversion	SNF1-related protein kinase regulatory subunit gamma-1 [Cucumis sativus]
CsaV3_2G002530	down	chr2	1092116	1092185	-	2.77e-05	-0.136712	22	0.18776	0.32447	--	--	CsaV3_2G002530.1.exon3	CsaV3_2G002530|	--	--	up	[M]	Cell wall/membrane/envelope biogenesis	Molecular Function: protein kinase activity (GO:0004672);; Molecular Function: ATP binding (GO:0005524);; Cellular Component: integral component of membrane (GO:0016021);;	K13415|4.4e-50|dosa:Os01t0718300-01|K13415 protein brassinosteroid insensitive 1 [EC:2.7.10.1 2.7.11.1] | (RefSeq) Os01g0718300, D61, DWARF_61; Similar to Systemin receptor SR160 precursor (EC 2.7.1.37) (Brassinosteroid LRR receptor kinase).	Plant hormone signal transduction (ko04075)	--	--	Protein kinase domain	Probable inactive receptor kinase At2g26730 OS=Arabidopsis thaliana OX=3702 GN=At2g26730 PE=1 SV=1	T	Signal transduction mechanisms	hypothetical protein Csa_019222 [Cucumis sativus]
CsaV3_2G003010	down	chr2	1393018	1393094	-	5.76e-11	-0.226429	14	0.67212	0.89855	--	CsaV3_2G003010|	--	--	CsaV3_2G003020|+	CsaV3_2G003020|	up	--	--	Molecular Function: electron carrier activity (GO:0009055);; Cellular Component: integral component of membrane (GO:0016021);; Cellular Component: anchored component of plasma membrane (GO:0046658);;	--	--	--	--	Plastocyanin-like domain	Cucumber peeling cupredoxin OS=Cucumis sativus OX=3659 PE=1 SV=3	S	Function unknown	cucumber peeling cupredoxin-like [Cucumis sativus]
CsaV3_2G008170	up	chr2	4427067	4427131	-	0.006516	0.143429	14	0.93969	0.79626	--	--	--	--	CsaV3_2G008170|-	--	up	[IR]	Lipid transport and metabolism;; General function prediction only	Molecular Function: oxidoreductase activity, acting on CH-OH group of donors (GO:0016614);; Molecular Function: flavin adenine dinucleotide binding (GO:0050660);;	K08248|1.3e-296|cmo:103493073|K08248 (R)-mandelonitrile lyase [EC:4.1.2.10] | (RefSeq) (R)-mandelonitrile lyase 1-like	Cyanoamino acid metabolism (ko00460)	[R]	General function prediction only	GMC oxidoreductase	(R)-mandelonitrile lyase 1 OS=Prunus serotina OX=23207 GN=MDL1 PE=1 SV=1	E	Amino acid transport and metabolism	(R)-mandelonitrile lyase 1-like [Cucumis sativus]
CsaV3_2G008220	up	chr2	4497123	4497425	-	0.028453	0.114889	15	0.55116	0.43627	--	--	--	--	CsaV3_2G008220|+	--	down	--	--	Cellular Component: nucleus (GO:0005634);; Molecular Function: zinc ion binding (GO:0008270);; Biological Process: regulation of flower development (GO:0009909);;	K12135|2.3e-22|thj:104802991|K12135 zinc finger protein CONSTANS | (RefSeq) zinc finger protein CONSTANS-LIKE 2-like	Circadian rhythm - plant (ko04712)	[K]	Transcription	CCT motif	Zinc finger protein CONSTANS-LIKE 5 OS=Arabidopsis thaliana OX=3702 GN=COL5 PE=2 SV=2	K	Transcription	zinc finger protein CONSTANS-LIKE 5 [Cucumis sativus]
CsaV3_2G009610	up	chr2	6109289	6109420	-	9.77e-06	0.137444	21	0.77763	0.64019	--	--	--	--	CsaV3_2G009610|+	--	down	--	--	Cellular Component: endoplasmic reticulum (GO:0005783);; Cellular Component: plasma membrane (GO:0005886);; Biological Process: auxin-activated signaling pathway (GO:0009734);; Biological Process: auxin polar transport (GO:0009926);; Biological Process: auxin homeostasis (GO:0010252);; Biological Process: auxin efflux (GO:0010315);; Molecular Function: auxin efflux transmembrane transporter activ…	K13947|6.3e-197|csv:101209818|K13947 auxin efflux carrier family protein | (RefSeq) auxin efflux carrier component 5	--	--	--	Membrane transport protein	Auxin efflux carrier component 5 OS=Arabidopsis thaliana OX=3702 GN=PIN5 PE=2 SV=2	P	Inorganic ion transport and metabolism	auxin efflux carrier component 5 [Cucumis sativus]
CsaV3_2G010620	down	chr2	7778577	7778713	-	0.002024	-0.131907	25	0.25863	0.39053	--	--	--	--	CsaV3_2G010620|-	--	up	--	--	Molecular Function: DNA binding (GO:0003677);; Cellular Component: nucleus (GO:0005634);;	K22218|2.7e-11|apro:F751_2022|K22218 protein-tyrosine sulfotransferase [EC:2.8.2.20] | (RefSeq) Protein-tyrosine sulfotransferase	--	--	--	MYB-CC type transfactor, LHEQLE motif	Myb family transcription factor PHL8 OS=Arabidopsis thaliana OX=3702 GN=PHL8 PE=2 SV=1	K	Transcription	myb family transcription factor PHL8 [Cucumis sativus]
CsaV3_2G010800	down	chr2	7980862	7980925	-	0.00028832	0.134286	14	0.93798	0.80369	--	CsaV3_2G010800|	--	--	CsaV3_2G010810|+	--	up	--	--	Molecular Function: DNA binding (GO:0003677);; Cellular Component: nuclear origin of replication recognition complex (GO:0005664);; Biological Process: DNA replication initiation (GO:0006270);;	K02608|4.0e-159|csv:101204841|K02608 origin recognition complex subunit 6 | (RefSeq) origin of replication complex subunit 6 isoform X1	--	[L]	Replication, recombination and repair	Origin recognition complex subunit 6 (ORC6)	Origin of replication complex subunit 6 OS=Arabidopsis thaliana OX=3702 GN=ORC6 PE=1 SV=2	L	Replication, recombination and repair	origin of replication complex subunit 6 isoform X1 [Cucumis sativus]
CsaV3_2G011110	up	chr2	8329879	8330120	-	0.012573	0.190806	12	0.52947	0.33867	--	--	--	--	CsaV3_2G011110|+	CsaV3_2G011110|	up	[QV]	Secondary metabolites biosynthesis, transport and catabolism;; Defense mechanisms	Molecular Function: monooxygenase activity (GO:0004497);; Molecular Function: iron ion binding (GO:0005506);; Cellular Component: integral component of membrane (GO:0016021);; Molecular Function: oxidoreductase activity, acting on paired donors, with incorporation or reduction of molecular oxygen (GO:0016705);; Molecular Function: heme binding (GO:0020037);;	K20661|2.2e-155|nnu:104612956|K20661 cytochrome P450 family 714 subfamily A polypeptide 1 | (RefSeq) cytochrome P450 714A1-like	--	[QI]	Secondary metabolites biosynthesis, transport and catabolism;; Lipid transport and metabolism	Cytochrome P450	Cytochrome P450 714C2 OS=Oryza sativa subsp. japonica OX=39947 GN=CYP714C2 PE=2 SV=1	Q	Secondary metabolites biosynthesis, transport and catabolism	cytochrome P450 714C2 [Cucumis sativus]
CsaV3_2G011320	up	chr2	8566152	8566268	-	6.85e-15	0.190397	26	0.88154	0.69114	--	CsaV3_2G011300|	--	--	CsaV3_2G011320|+	--	up	--	--	Cellular Component: integral component of membrane (GO:0016021);; Biological Process: positive regulation of organ growth (GO:0046622);;	--	--	--	--	--	ARGOS-like protein OS=Arabidopsis thaliana OX=3702 GN=ARL PE=2 SV=1	S	Function unknown	hypothetical protein Csa_006551 [Cucumis sativus]
CsaV3_2G011320	up	chr2	8568954	8569409	-	0.036177	0.142014	24	0.36664	0.22463	--	--	--	--	CsaV3_2G011320|+	--	up
CsaV3_2G011320	up	chr2	8572524	8572694	-	0.021154	0.181667	16	0.64458	0.46292	--	--	--	--	CsaV3_2G011320|+	--	up
CsaV3_2G012830	up	chr2	10366021	10366154	-	0.04455	0.1705	14	0.50683	0.33633	--	--	--	--	CsaV3_2G012830|+	CsaV3_2G012820|	down	--	--	--	--	--	--	--	--	--	--	--	hypothetical protein Csa_006284, partial [Cucumis sativus]
CsaV3_2G013770	down	chr2	11310483	11310539	-	0.028299	-0.182143	14	0.39629	0.57843	--	--	--	--	CsaV3_2G013770|+	--	up	--	--	Cellular Component: nucleosome (GO:0000786);; Molecular Function: DNA binding (GO:0003677);; Cellular Component: nucleus (GO:0005634);; Molecular Function: protein heterodimerization activity (GO:0046982);;	K11251|9.1e-69|cmax:111466999|K11251 histone H2A | (RefSeq) histone H2A variant 1	--	[B]	Chromatin structure and dynamics	Core histone H2A/H2B/H3/H4	Histone H2A variant 1 OS=Arabidopsis thaliana OX=3702 GN=H2AV PE=1 SV=1	B	Chromatin structure and dynamics	histone H2A variant 1 [Cucumis sativus]
CsaV3_2G013770	up	chr2	11317216	11317268	-	0.033492	0.199733	5	0.89267	0.69293	--	--	--	--	CsaV3_2G013770|+	CsaV3_2G013770|	up
CsaV3_2G013880	down	chr2	11420988	11421040	-	0.0030142	-0.238429	7	0.2011	0.43952	--	CsaV3_2G013880|	--	--	CsaV3_2G013880|-	--	up
CsaV3_2G013880	up	chr2	11425540	11425617	-	0.020245	0.147556	9	0.90848	0.76093	--	--	--	--	CsaV3_2G013890|+	CsaV3_2G013880|	down	--	--	Molecular Function: RNA polymerase II core promoter proximal region sequence-specific DNA binding (GO:0000978);; Molecular Function: transcription factor activity, sequence-specific DNA binding (GO:0003700);; Cellular Component: nucleus (GO:0005634);; Biological Process: cellular response to heat (GO:0034605);; Cellular Component: host cell nucleus (GO:0042025);; Molecular Function: sequence-spec…	K09419|1.1e-192|csv:101212281|K09419 heat shock transcription factor, other eukaryote | (RefSeq) heat stress transcription factor A-7a	--	[K]	Transcription	HSF-type DNA-binding	Heat stress transcription factor A-2d OS=Oryza sativa subsp. japonica OX=39947 GN=HSFA2D PE=2 SV=2	K	Transcription	heat stress transcription factor A-7a [Cucumis sativus]
CsaV3_2G014660	up	chr2	12239137	12239315	-	2.73e-05	0.158917	12	0.32703	0.16811	--	CsaV3_2G014660|	--	--	CsaV3_2G014660|-	--	up	--	--	Molecular Function: hydrolase activity, hydrolyzing O-glycosyl compounds (GO:0004553);; Biological Process: carbohydrate metabolic process (GO:0005975);; Cellular Component: anchored component of plasma membrane (GO:0046658);;	K19891|1.6e-77|smo:SELMODRAFT_442025|K19891 glucan endo-1,3-beta-glucosidase 1/2/3 [EC:3.2.1.39] | (RefSeq) hypothetical protein	Starch and sucrose metabolism (ko00500)	--	--	Glycosyl hydrolases family 17	Glucan endo-1,3-beta-D-glucosidase OS=Olea europaea OX=4146 GN=OLE9 PE=1 SV=1	G	Carbohydrate transport and metabolism	hypothetical protein Csa_006041 [Cucumis sativus]
CsaV3_2G014660	up	chr2	12239537	12239659	-	0.010827	0.180769	13	0.86015	0.67938	--	CsaV3_2G014660|	--	--	CsaV3_2G014660|-	--	up
CsaV3_2G014660	up	chr2	12243719	12243777	-	0.024166	0.135905	7	0.79929	0.66338	--	--	--	CsaV3_2G014660|	--	--	up
CsaV3_2G014930	down	chr2	12427004	12427119	-	0.00057269	-0.155667	12	0.21986	0.37553	--	--	--	--	CsaV3_2G014930|+	--	down	--	--	Cellular Component: integral component of membrane (GO:0016021);;	--	--	--	--	--	--	S	Function unknown	uncharacterized protein LOC105434603 [Cucumis sativus]
CsaV3_2G015860	down	chr2	13156746	13156821	-	0.028466	-0.104167	6	0.15994	0.26411	--	CsaV3_2G015860|,CsaV3_2G015870|	--	--	CsaV3_2G015870|-	--	up	--	--	Molecular Function: protein binding (GO:0005515);;	K00276|1.3e-85|pvu:PHAVU_003G204000g|K00276 primary-amine oxidase [EC:1.4.3.21] | (RefSeq) hypothetical protein	Glycine, serine and threonine metabolism (ko00260);; Tyrosine metabolism (ko00350);; Phenylalanine metabolism (ko00360);; beta-Alanine metabolism (ko00410);; Isoquinoline alkaloid biosynthesis (ko00950);; Tropane, piperidine and pyridine alkaloid biosynthesis (ko00960)	--	--	Armadillo/beta-catenin-like repeat	--	S	Function unknown	uncharacterized protein LOC101216019 [Cucumis sativus]
CsaV3_2G018190	up	chr2	15146904	15146970	-	0.0042103	0.155067	10	0.36377	0.2087	--	--	--	--	CsaV3_2G018200|+	CsaV3_2G018190|	up	[GI]	Carbohydrate transport and metabolism;; Lipid transport and metabolism	Molecular Function: pectinesterase activity (GO:0030599);; Biological Process: cell wall modification (GO:0042545);; Molecular Function: aspartyl esterase activity (GO:0045330);; Biological Process: pectin catabolic process (GO:0045490);; Molecular Function: pectinesterase inhibitor activity (GO:0046910);;	K01051|1.5e-87|vra:106772937|K01051 pectinesterase [EC:3.1.1.11] | (RefSeq) pectinesterase 2	Pentose and glucuronate interconversions (ko00040)	--	--	Pectinesterase	Probable pectinesterase/pectinesterase inhibitor 51 OS=Arabidopsis thaliana OX=3702 GN=PME51 PE=2 SV=1	G	Carbohydrate transport and metabolism	probable pectinesterase/pectinesterase inhibitor 51 [Cucumis sativus]
CsaV3_2G019810	up	chr2	15815282	15815542	-	0.00011908	0.115647	34	0.76225	0.64661	--	--	--	--	CsaV3_2G019810|+	--	up	--	--	Biological Process: defense response (GO:0006952);;	--	--	--	--	Gamma-thionin family	Defensin-like protein OS=Petunia integrifolia OX=4103 PE=2 SV=1	O	Posttranslational modification, protein turnover, chaperones	hypothetical protein Csa_016920 [Cucumis sativus]
CsaV3_2G021090	up	chr2	16087044	16087112	-	0.012849	0.192485	11	0.81848	0.626	--	--	--	--	CsaV3_2G021100|-	CsaV3_2G021090|	down	--	--	Cellular Component: integral component of membrane (GO:0016021);; Molecular Function: transmembrane transporter activity (GO:0022857);;	--	--	--	--	Nodulin-like	--	S	Function unknown	uncharacterized protein LOC101208506 [Cucumis sativus]
CsaV3_2G022180	up	chr2	16342761	16342837	-	0.020119	0.1776	5	0.27047	0.092867	--	--	--	--	CsaV3_2G022180|+	CsaV3_2G022180|	down	--	--	Molecular Function: DNA binding (GO:0003677);; Cellular Component: nucleus (GO:0005634);; Biological Process: regulation of transcription, DNA-templated (GO:0006355);;	K00521|7.8e-34|cmos:111447866|K00521 ferric-chelate reductase [EC:1.16.1.7] | (RefSeq) ferric reduction oxidase 7, chloroplastic-like	--	--	--	No apical meristem (NAM) protein	NAC domain-containing protein 21/22 OS=Arabidopsis thaliana OX=3702 GN=NAC021 PE=1 SV=2	K	Transcription	NAC domain-containing protein 21/22 [Cucumis sativus]
CsaV3_2G025880	up	chr2	17762738	17762840	-	0.013024	0.162095	14	0.92676	0.76467	--	--	--	--	CsaV3_2G025880|+	CsaV3_2G025870|	up	[N]	Cell motility	Cellular Component: Golgi apparatus (GO:0005794);; Cellular Component: plasmodesma (GO:0009506);; Cellular Component: integral component of membrane (GO:0016021);; Molecular Function: transferase activity, transferring glycosyl groups (GO:0016757);;	K20887|1.6e-246|hbr:110659230|K20887 xyloglucan glycosyltransferase 4 [EC:2.4.1.-] | (RefSeq) xyloglucan glycosyltransferase 4-like	--	--	--	Glycosyl transferase family group 2	Probable xyloglucan glycosyltransferase 12 OS=Arabidopsis thaliana OX=3702 GN=CSLC12 PE=1 SV=1	M	Cell wall/membrane/envelope biogenesis	probable xyloglucan glycosyltransferase 12 [Cucumis sativus]
CsaV3_2G027850	up	chr2	18421259	18421333	-	0.0055802	0.106778	6	0.88094	0.77417	--	CsaV3_2G027840|	--	--	CsaV3_2G027850|+	--	down	--	--	Molecular Function: calcium ion binding (GO:0005509);;	--	--	--	--	EF hand	--	--	--	hypothetical protein Csa_021918 [Cucumis sativus]
CsaV3_2G027850	up	chr2	18422838	18422935	-	0.022498	0.178815	18	0.78957	0.61076	--	--	--	--	CsaV3_2G027850|+	--	down
CsaV3_2G027850	up	chr2	18426654	18426784	-	0.0191	0.127593	9	0.18693	0.059333	--	--	--	--	CsaV3_2G027850|+	--	down
CsaV3_2G028910	up	chr2	18935800	18935882	-	0.016077	0.101487	13	0.77523	0.67374	--	--	--	--	CsaV3_2G028910|+	CsaV3_2G028900|	down	--	--	Cellular Component: integral component of membrane (GO:0016021);;	--	--	--	--	--	--	--	--	uncharacterized protein LOC105434756 [Cucumis sativus]
CsaV3_2G029770	down	chr2	19491704	19491769	-	3.57e-08	-0.117311	15	0.6318	0.74911	--	CsaV3_2G029770|	--	--	CsaV3_2G029780|+	CsaV3_2G029780|	up	--	--	--	K00020|1.8e-19|mtr:MTR_8g088900|K00020 3-hydroxyisobutyrate dehydrogenase [EC:1.1.1.31] | (RefSeq) 6-phosphogluconate dehydrogenase-like protein	Valine, leucine and isoleucine degradation (ko00280)	--	--	Phosphate-induced protein 1 conserved region	Protein PHOSPHATE-INDUCED 1 OS=Nicotiana tabacum OX=4097 GN=PHI-1 PE=2 SV=1	L	Replication, recombination and repair	protein PHOSPHATE-INDUCED 1 [Cucumis sativus]
CsaV3_2G030370	up	chr2	19942950	19943163	-	0.0030806	0.120694	24	0.31117	0.19047	--	CsaV3_2G030370|	--	--	CsaV3_2G030390|+	CsaV3_2G030380|	up	--	--	Molecular Function: aspartic-type endopeptidase activity (GO:0004190);; Biological Process: proteolysis (GO:0006508);; Biological Process: protein catabolic process (GO:0030163);;	K22683|7.7e-53|han:110891469|K22683 aspartyl protease family protein [EC:3.4.23.-] | (RefSeq) aspartyl protease family protein 2-like	--	[O]	Posttranslational modification, protein turnover, chaperones	Xylanase inhibitor N-terminal	Aspartyl protease AED3 OS=Arabidopsis thaliana OX=3702 GN=AED3 PE=1 SV=1	O	Posttranslational modification, protein turnover, chaperones	aspartyl protease AED3 [Cucumis sativus]
CsaV3_2G031250	up	chr2	20571833	20572006	-	6.62e-09	0.261667	19	0.56005	0.29839	--	CsaV3_2G031250|	--	--	CsaV3_2G031250|-	CsaV3_2G031240|	down	--	--	Cellular Component: vacuole (GO:0005773);; Cellular Component: integral component of membrane (GO:0016021);;	--	--	--	--	Protein of unknown function (DUF3537)	--	S	Function unknown	uncharacterized protein LOC101214952 [Cucumis sativus]
CsaV3_2G031250	up	chr2	20573231	20573291	-	0.033668	0.109972	12	0.31822	0.20825	--	CsaV3_2G031250|	--	--	CsaV3_2G031250|-	--	down
CsaV3_2G033300	up	chr2	22115495	22115589	-	0.029191	0.152733	15	0.36569	0.21296	--	--	--	--	CsaV3_2G033300|+	--	down	[HR]	Coenzyme transport and metabolism;; General function prediction only	Biological Process: sucrose metabolic process (GO:0005985);; Molecular Function: sucrose synthase activity (GO:0016157);; Molecular Function: sucrose-phosphate synthase activity (GO:0046524);;	K00696|0.0e+00|csv:101220898|K00696 sucrose-phosphate synthase [EC:2.4.1.14] | (RefSeq) probable sucrose-phosphate synthase 4	Starch and sucrose metabolism (ko00500)	[M]	Cell wall/membrane/envelope biogenesis	Glycosyl transferases group 1	Probable sucrose-phosphate synthase 4 OS=Arabidopsis thaliana OX=3702 GN=SPS4 PE=1 SV=1	M	Cell wall/membrane/envelope biogenesis	hypothetical protein Csa_022460 [Cucumis sativus]
CsaV3_3G001750	down	chr3	1313053	1313171	-	0.0020183	-0.161921	21	0.38506	0.54698	--	CsaV3_3G001750|	--	--	CsaV3_3G001750|-	CsaV3_3G001740|	up	--	--	Molecular Function: L-ornithine transmembrane transporter activity (GO:0000064);; Cellular Component: integral component of membrane (GO:0016021);; Biological Process: mitochondrial L-ornithine transmembrane transport (GO:1990575);;	K15109|3.9e-165|csv:101204488|K15109 solute carrier family 25 (mitochondrial carnitine/acylcarnitine transporter), member 20/29 | (RefSeq) mitochondrial carnitine/acylcarnitine carrier-like protein	--	[C]	Energy production and conversion	Mitochondrial carrier protein	Mitochondrial carnitine/acylcarnitine carrier-like protein OS=Arabidopsis thaliana OX=3702 GN=BOU PE=1 SV=1	C	Energy production and conversion	mitochondrial carnitine/acylcarnitine carrier-like protein [Cucumis sativus]
CsaV3_3G002460	up	chr3	1970017	1970120	-	0.029213	0.112244	15	0.69033	0.57809	--	CsaV3_3G002460|	--	--	CsaV3_3G002460|-	--	up	--	--	Molecular Function: DNA binding (GO:0003677);; Molecular Function: transcription factor activity, sequence-specific DNA binding (GO:0003700);; Cellular Component: nucleus (GO:0005634);;	K09286|6.1e-156|csv:101203663|K09286 EREBP-like factor | (RefSeq) ethylene-responsive transcription factor 2	--	--	--	AP2 domain	Ethylene-responsive transcription factor 1A OS=Arabidopsis thaliana OX=3702 GN=ERF1A PE=1 SV=2	K	Transcription	hypothetical protein Csa_011730 [Cucumis sativus]
CsaV3_3G002480	up	chr3	1992784	1992834	-	0.0061155	0.401667	5	0.806	0.40433	--	CsaV3_3G002470|	--	--	CsaV3_3G002480|+	--	down	[V]	Defense mechanisms	Biological Process: signal transduction (GO:0007165);; Molecular Function: NADH pyrophosphatase activity (GO:0035529);; Molecular Function: ADP-ribose diphosphatase activity (GO:0047631);; Molecular Function: NAD binding (GO:0051287);;	K22763|2.9e-74|lja:Lj2g3v1989220.3|K22763 deubiquitinase DESI2 [EC:3.4.19.12] | (RefSeq) Lj2g3v1989220.3; -	--	[T]	Signal transduction mechanisms	Nudix hydrolase domain	Nudix hydrolase 8 OS=Arabidopsis thaliana OX=3702 GN=NUDT8 PE=2 SV=2	T	Signal transduction mechanisms	nudix hydrolase 8 isoform X1 [Cucumis sativus]
CsaV3_3G002480	up	chr3	1995317	1995371	-	0.0052196	0.135	9	0.24715	0.11215	--	--	--	--	CsaV3_3G002480|+	--	down
CsaV3_3G002780	down	chr3	2254929	2255046	-	0.004601	-0.140646	16	0.24185	0.3825	--	CsaV3_3G002790|,CsaV3_3G002770|	--	--	CsaV3_3G002780|+	CsaV3_3G002780|	down	[O]	Posttranslational modification, protein turnover, chaperones	Biological Process: response to stress (GO:0006950);; Biological Process: response to osmotic stress (GO:0006970);; Biological Process: biological_process (GO:0008150);; Biological Process: response to temperature stimulus (GO:0009266);; Biological Process: response to heat (GO:0009408);; Biological Process: response to abiotic stimulus (GO:0009628);; Biological Process: response to stimulus (GO:…	K13993|9.4e-97|cmo:103490889|K13993 HSP20 family protein | (RefSeq) small heat shock protein, chloroplastic-like	Protein processing in endoplasmic reticulum (ko04141)	[O]	Posttranslational modification, protein turnover, chaperones	Hsp20/alpha crystallin family	Small heat shock protein, chloroplastic OS=Oxybasis rubra OX=3560 GN=HSP23 PE=2 SV=1	O	Posttranslational modification, protein turnover, chaperones	small heat shock protein, chloroplastic isoform X2 [Cucumis sativus]
CsaV3_3G003810	up	chr3	3193977	3194103	-	0.0072599	0.130479	16	0.66656	0.53608	--	--	--	--	CsaV3_3G003810|+	--	up	--	--	Biological Process: recombinational repair (GO:0000725);; Molecular Function: ADP binding (GO:0043531);;	--	--	--	--	NB-ARC domain	--	O	Posttranslational modification, protein turnover, chaperones	uncharacterized protein LOC101212498 [Cucumis sativus]
CsaV3_3G003810	down	chr3	3199424	3199503	-	1.54e-09	-0.150156	15	0.78111	0.93127	--	--	--	--	CsaV3_3G003810|+	CsaV3_3G003810|	up
CsaV3_3G004480	up	chr3	3786212	3786277	-	0.0030705	0.138292	16	0.7734	0.6351	--	--	--	--	CsaV3_3G004490|-	CsaV3_3G004480|	down	[R]	General function prediction only	--	K06911|3.4e-177|csv:101204082|K06911 quercetin 2,3-dioxygenase [EC:1.13.11.24] | (RefSeq) pirin-like protein	--	--	--	Pirin C-terminal cupin domain	Pirin-like protein At1g50590 OS=Arabidopsis thaliana OX=3702 GN=At1g50590 PE=2 SV=1	S	Function unknown	pirin-like protein [Cucumis sativus]
CsaV3_3G005070	up	chr3	4230853	4230918	-	0.00021454	0.234196	17	0.76871	0.53451	--	CsaV3_3G005070|	--	--	CsaV3_3G005070|-	--	up	[V]	Defense mechanisms	Cellular Component: mitochondrion (GO:0005739);; Cellular Component: cytosol (GO:0005829);; Molecular Function: deaminase activity (GO:0019239);; Biological Process: organonitrogen compound catabolic process (GO:1901565);;	K09022|9.1e-96|csv:101217156|K09022 2-iminobutanoate/2-iminopropanoate deaminase [EC:3.5.99.10] | (RefSeq) CHRD; chordin	--	[J]	Translation, ribosomal structure and biogenesis	Endoribonuclease L-PSP	Reactive Intermediate Deaminase A, chloroplastic OS=Arabidopsis thaliana OX=3702 GN=RIDA PE=1 SV=1	J	Translation, ribosomal structure and biogenesis	hypothetical protein Csa_010346 [Cucumis sativus]
CsaV3_3G007750	up	chr3	6783969	6784034	-	0.00090289	0.169056	12	0.35081	0.18175	--	--	--	--	CsaV3_3G007750|+	--	down	--	--	Cellular Component: nucleus (GO:0005634);; Molecular Function: sequence-specific DNA binding (GO:0043565);; Biological Process: positive regulation of transcription, DNA-templated (GO:0045893);;	K09338|3.6e-110|csv:101204509|K09338 homeobox-leucine zipper protein | (RefSeq) homeobox-leucine zipper protein ATHB-12	--	[K]	Transcription	Homeodomain	Homeobox-leucine zipper protein ATHB-7 OS=Arabidopsis thaliana OX=3702 GN=ATHB-7 PE=1 SV=2	K	Transcription	homeobox-leucine zipper protein ATHB-12 [Cucumis sativus]
CsaV3_3G008190	up	chr3	7032898	7032979	-	0.00793	0.177704	9	0.38189	0.20419	--	--	--	CsaV3_3G008190|	--	--	down	[M]	Cell wall/membrane/envelope biogenesis	Molecular Function: 3-beta-hydroxy-delta5-steroid dehydrogenase activity (GO:0003854);; Biological Process: steroid biosynthetic process (GO:0006694);; Molecular Function: oxidoreductase activity (GO:0016491);; Molecular Function: oxidoreductase activity, acting on the CH-OH group of donors, NAD or NADP as acceptor (GO:0016616);;	K08695|2.7e-37|psom:113318553|K08695 anthocyanidin reductase [EC:1.3.1.77] | (RefSeq) anthocyanidin reductase ((2S)-flavan-3-ol-forming)-like isoform X1	Flavonoid biosynthesis (ko00941)	[V]	Defense mechanisms	NAD dependent epimerase/dehydratase family	Anthocyanidin reductase ((2S)-flavan-3-ol-forming) OS=Vitis vinifera OX=29760 GN=ANR PE=1 SV=1	V	Defense mechanisms	putative anthocyanidin reductase [Cucumis sativus]
CsaV3_3G008370	down	chr3	7116436	7116656	-	0.0019494	-0.166045	22	0.59588	0.76192	--	CsaV3_3G008360|	--	--	CsaV3_3G008370|+	CsaV3_3G008370|	up	[G]	Carbohydrate transport and metabolism	Cellular Component: cytoplasm (GO:0005737);; Biological Process: carbohydrate metabolic process (GO:0005975);; Molecular Function: carbohydrate binding (GO:0030246);; Molecular Function: glucose-6-phosphate 1-epimerase activity (GO:0047938);;	K01792|3.3e-183|csv:101213965|K01792 glucose-6-phosphate 1-epimerase [EC:5.1.3.15] | (RefSeq) putative glucose-6-phosphate 1-epimerase	Glycolysis / Gluconeogenesis (ko00010)	[G]	Carbohydrate transport and metabolism	Aldose 1-epimerase	Putative glucose-6-phosphate 1-epimerase OS=Cenchrus ciliaris OX=35872 PE=2 SV=1	G	Carbohydrate transport and metabolism	putative glucose-6-phosphate 1-epimerase [Cucumis sativus]
CsaV3_3G010210	up	chr3	8205005	8205072	-	0.0032374	0.146356	15	0.63256	0.4862	--	CsaV3_3G010200|	--	--	CsaV3_3G010210|+	--	up	[E]	Amino acid transport and metabolism	Cellular Component: integral component of membrane (GO:0016021);; Molecular Function: transmembrane transporter activity (GO:0022857);;	K14638|0.0e+00|csv:101222134|K14638 solute carrier family 15 (peptide/histidine transporter), member 3/4 | (RefSeq) protein NRT1/ PTR FAMILY 7.3	--	[E]	Amino acid transport and metabolism	POT family	Protein NRT1/ PTR FAMILY 7.3 OS=Arabidopsis thaliana OX=3702 GN=NPF7.3 PE=1 SV=2	E	Amino acid transport and metabolism	protein NRT1/ PTR FAMILY 7.3 [Cucumis sativus]
CsaV3_3G010210	down	chr3	8208600	8208674	-	0.0030998	-0.107444	12	0.45664	0.56408	--	--	--	--	CsaV3_3G010210|+	--	up
CsaV3_3G012170	up	chr3	9388760	9388890	-	5.66e-06	0.12677	42	0.82446	0.69769	--	--	--	--	CsaV3_3G012180|+	CsaV3_3G012170|	up	--	--	Molecular Function: DNA binding (GO:0003677);; Molecular Function: transcription factor activity, sequence-specific DNA binding (GO:0003700);; Cellular Component: nucleus (GO:0005634);;	K14516|2.5e-119|csv:101210326|K14516 ethylene-responsive transcription factor 1 | (RefSeq) ethylene-response factor C3	MAPK signaling pathway - plant (ko04016);; Plant hormone signal transduction (ko04075)	--	--	AP2 domain	Ethylene-responsive transcription factor 1B OS=Arabidopsis thaliana OX=3702 GN=ERF1B PE=1 SV=2	K	Transcription	ethylene-response factor C3 [Cucumis sativus]
CsaV3_3G014170	up	chr3	10639446	10639511	-	0.00028867	0.249667	11	0.56221	0.31255	--	CsaV3_3G014170|	--	--	CsaV3_3G014180|+	CsaV3_3G014180|	up	--	--	Cellular Component: plasma membrane (GO:0005886);; Biological Process: cell-cell junction assembly (GO:0007043);; Cellular Component: integral component of membrane (GO:0016021);; Biological Process: cell wall modification (GO:0042545);; Cellular Component: Casparian strip (GO:0048226);; Molecular Function: 4 iron, 4 sulfur cluster binding (GO:0051539);;	--	--	--	--	Domain of unknown function (DUF588)	CASP-like protein 1E2 OS=Glycine max OX=3847 PE=2 SV=1	S	Function unknown	CASP-like protein 1E2 [Cucumis sativus]
CsaV3_3G014890	down	chr3	11045050	11045141	-	0.012422	-0.135074	9	0.48096	0.61604	--	CsaV3_3G014890|	--	--	CsaV3_3G014900|+	CsaV3_3G014900|	down	--	--	--	--	--	--	--	--	--	--	--	hypothetical protein Csa_010351 [Cucumis sativus]
CsaV3_3G015570	up	chr3	11606397	11606889	-	0.0051782	0.116495	31	0.43351	0.31701	--	--	--	--	CsaV3_3G015580|+	CsaV3_3G015570|	up	--	--	Biological Process: chloroplast organization (GO:0009658);; Cellular Component: chloroplast outer membrane (GO:0009707);;	--	--	--	--	--	Protein CHUP1, chloroplastic OS=Arabidopsis thaliana OX=3702 GN=CHUP1 PE=1 SV=1	S	Function unknown	protein CHUP1, chloroplastic [Cucumis sativus]
CsaV3_3G021920	down	chr3	19041030	19041191	-	9.71e-06	-0.2004	10	0.0461	0.2465	--	CsaV3_3G021920|	--	--	CsaV3_3G021920|-	--	up	--	--	Cellular Component: integral component of membrane (GO:0016021);;	--	--	--	--	Arabinogalactan peptide	Arabinogalactan protein 41 OS=Arabidopsis thaliana OX=3702 GN=AGP41 PE=1 SV=1	S	Function unknown	hypothetical protein Csa_009896 [Cucumis sativus]
CsaV3_3G022290	up	chr3	19560453	19560650	-	0.007596	0.131667	29	0.50643	0.37476	--	--	--	--	CsaV3_3G022290|-	CsaV3_3G022280|	up	--	--	Molecular Function: DNA binding (GO:0003677);; Cellular Component: nucleus (GO:0005634);;	K09422|7.4e-146|csv:101220946|K09422 transcription factor MYB, plant | (RefSeq) transcription factor MYB4	--	[K]	Transcription	Myb-like DNA-binding domain	Transcription factor MYB14 OS=Arabidopsis thaliana OX=3702 GN=MYB14 PE=2 SV=1	--	--	transcription factor MYB4 [Cucumis sativus]
CsaV3_3G022290	up	chr3	19580658	19580725	-	0.0018307	0.218636	11	0.58939	0.37076	--	CsaV3_3G022290|	--	--	CsaV3_3G022290|-	--	up
CsaV3_3G023620	up	chr3	21341834	21341932	-	3.5e-07	0.249351	19	0.50621	0.25686	--	--	--	--	CsaV3_3G023620|-	--	up	[V]	Defense mechanisms	Molecular Function: ATP binding (GO:0005524);; Cellular Component: plasma membrane (GO:0005886);; Cellular Component: integral component of membrane (GO:0016021);; Molecular Function: ATPase activity (GO:0016887);; Molecular Function: ATPase activity, coupled to transmembrane movement of substances (GO:0042626);; Biological Process: transmembrane transport (GO:0055085);; Biological Process: p-cou…	K08712|5.6e-148|gsl:Gasu_29800|K08712 ATP-binding cassette, subfamily G (WHITE), member 2, SNQ2 | (RefSeq) ABC transporter, ATP-binding protein	ABC transporters (ko02010)	[Q]	Secondary metabolites biosynthesis, transport and catabolism	ABC-2 type transporter	ABC transporter G family member 36 OS=Arabidopsis thaliana OX=3702 GN=ABCG36 PE=1 SV=1	Q	Secondary metabolites biosynthesis, transport and catabolism	hypothetical protein Csa_010583 [Cucumis sativus]
CsaV3_3G023620	down	chr3	21392084	21392167	-	3.41e-05	-0.272733	10	0.5092	0.78193	--	--	--	--	CsaV3_3G023630|-	CsaV3_3G023620|	up
CsaV3_3G025070	up	chr3	21986941	21987028	-	0.027466	0.205958	8	0.39663	0.19067	--	--	--	--	CsaV3_3G025070|-	--	up	--	--	Molecular Function: ATP transmembrane transporter activity (GO:0005347);; Biological Process: acyl carnitine transport (GO:0006844);; Biological Process: amino acid transport (GO:0006865);; Cellular Component: integral component of membrane (GO:0016021);;	K15109|5.8e-180|csv:101222749|K15109 solute carrier family 25 (mitochondrial carnitine/acylcarnitine transporter), member 20/29 | (RefSeq) mitochondrial arginine transporter BAC2	--	[C]	Energy production and conversion	Mitochondrial carrier protein	Mitochondrial arginine transporter BAC2 OS=Arabidopsis thaliana OX=3702 GN=BAC2 PE=1 SV=1	C	Energy production and conversion	mitochondrial arginine transporter BAC2 [Cucumis sativus]
CsaV3_3G027450	up	chr3	23744348	23744459	-	6.71e-08	0.305708	16	0.7596	0.4539	--	CsaV3_3G027450|	--	--	CsaV3_3G027460|+	--	down	[G]	Carbohydrate transport and metabolism	Molecular Function: UDP-glycosyltransferase activity (GO:0008194);; Cellular Component: intracellular membrane-bounded organelle (GO:0043231);; Molecular Function: quercetin 3-O-glucosyltransferase activity (GO:0080043);; Molecular Function: quercetin 7-O-glucosyltransferase activity (GO:0080044);;	K13691|1.1e-286|csv:101210034|K13691 pathogen-inducible salicylic acid glucosyltransferase [EC:2.4.1.-] | (RefSeq) UDP-glycosyltransferase 74E2	--	[GC]	Carbohydrate transport and metabolism;; Energy production and conversion	UDP-glucoronosyl and UDP-glucosyl transferase	UDP-glycosyltransferase 74E2 OS=Arabidopsis thaliana OX=3702 GN=UGT74E2 PE=1 SV=1	--	--	UDP-glycosyltransferase 74E2 [Cucumis sativus]
CsaV3_3G027630	down	chr3	23904894	23904984	-	0.0062772	-0.1688	15	0.58558	0.75438	--	CsaV3_3G027620|	--	--	CsaV3_3G027630|+	--	up	[F]	Nucleotide transport and metabolism	Biological Process: deoxyribonucleotide biosynthetic process (GO:0009263);; Molecular Function: oxidoreductase activity (GO:0016491);;	K10808|1.4e-192|csv:101222416|K10808 ribonucleoside-diphosphate reductase subunit M2 [EC:1.17.4.1] | (RefSeq) ribonucleoside-diphosphate reductase small chain	Purine metabolism (ko00230);; Pyrimidine metabolism (ko00240);; Glutathione metabolism (ko00480)	[F]	Nucleotide transport and metabolism	Ribonucleotide reductase, small chain	Ribonucleoside-diphosphate reductase small chain OS=Nicotiana tabacum OX=4097 PE=2 SV=1	F	Nucleotide transport and metabolism	ribonucleoside-diphosphate reductase small chain [Cucumis sativus]
CsaV3_3G027720	down	chr3	24019621	24020058	-	0.0047578	-0.141228	19	0.58877	0.73	--	--	--	--	CsaV3_3G027720|+	--	up	[IQR]	Lipid transport and metabolism;; Secondary metabolites biosynthesis, transport and catabolism;; General function prediction only	--	K09841|3.7e-59|bdi:100827045|K09841 xanthoxin dehydrogenase [EC:1.1.1.288] | (RefSeq) zerumbone synthase isoform X2	Carotenoid biosynthesis (ko00906)	[R]	General function prediction only	Enoyl-(Acyl carrier protein) reductase	Short-chain dehydrogenase reductase 2a OS=Arabidopsis thaliana OX=3702 GN=SDR2a PE=3 SV=1	Q	Secondary metabolites biosynthesis, transport and catabolism	short-chain dehydrogenase reductase 3c [Cucumis sativus]
CsaV3_3G030310	up	chr3	26042562	26042626	-	3.19e-07	0.187373	17	0.92933	0.74196	--	--	--	--	CsaV3_3G030310|+	--	up	[H]	Coenzyme transport and metabolism	Cellular Component: cytoplasm (GO:0005737);; Cellular Component: endosome (GO:0005768);; Cellular Component: Golgi apparatus (GO:0005794);; Cellular Component: trans-Golgi network (GO:0005802);; Molecular Function: methyltransferase activity (GO:0008168);; Cellular Component: integral component of membrane (GO:0016021);; Biological Process: methylation (GO:0032259);;	K23872|8.7e-140|egu:105043413|K23872 putative homogalacturonan methyltransferase [EC:2.1.1.-] | (RefSeq) probable methyltransferase PMT13 isoform X1	--	--	--	Putative S-adenosyl-L-methionine-dependent methyltransferase	Probable methyltransferase PMT21 OS=Arabidopsis thaliana OX=3702 GN=ERD3 PE=2 SV=1	S	Function unknown	probable methyltransferase PMT21 isoform X1 [Cucumis sativus]
CsaV3_3G030310	up	chr3	26064102	26064219	-	5.64e-05	0.121111	18	0.9048	0.78369	--	--	--	--	CsaV3_3G030310|+	--	up
CsaV3_3G030310	down	chr3	26067578	26067642	-	0.00038773	-0.137296	9	0.68207	0.81937	--	--	--	--	CsaV3_3G030310|+	--	up
CsaV3_3G031040	down	chr3	26822997	26823200	-	0.0089204	-0.1028	30	0.71887	0.82167	--	CsaV3_3G031040|	--	--	CsaV3_3G031040|-	--	up	[GI]	Carbohydrate transport and metabolism;; Lipid transport and metabolism	Cellular Component: extracellular region (GO:0005576);; Cellular Component: cell wall (GO:0005618);; Molecular Function: pectinesterase activity (GO:0030599);; Biological Process: cell wall modification (GO:0042545);; Molecular Function: aspartyl esterase activity (GO:0045330);; Biological Process: pectin catabolic process (GO:0045490);; Molecular Function: pectinesterase inhibitor activity (GO:0…	K01051|0.0e+00|csv:101207996|K01051 pectinesterase [EC:3.1.1.11] | (RefSeq) pectinesterase	Pentose and glucuronate interconversions (ko00040)	--	--	Pectinesterase	Pectinesterase/pectinesterase inhibitor U1 OS=Solanum lycopersicum OX=4081 GN=PMEU1 PE=2 SV=1	G	Carbohydrate transport and metabolism	pectinesterase [Cucumis sativus]
CsaV3_3G032310	down	chr3	27881029	27881142	-	0.0030116	-0.292917	16	0.37481	0.66773	--	--	--	CsaV3_3G032310|	--	--	up	[QV]	Secondary metabolites biosynthesis, transport and catabolism;; Defense mechanisms	Molecular Function: iron ion binding (GO:0005506);; Cellular Component: membrane (GO:0016020);; Cellular Component: integral component of membrane (GO:0016021);; Molecular Function: oxidoreductase activity, acting on paired donors, with incorporation or reduction of molecular oxygen, NAD(P)H as one donor, and incorporation of one atom of oxygen (GO:0016709);; Molecular Function: heme binding (GO:…	K23814|1.9e-300|csv:101210137|K23814 cytochrome P450 family 705 subfamily A [EC:1.14.-.-] | (RefSeq) cytochrome P450 705A5-like	--	[Q]	Secondary metabolites biosynthesis, transport and catabolism	Cytochrome P450	Cytochrome P450 705A5 OS=Arabidopsis thaliana OX=3702 GN=CYP705A5 PE=2 SV=1	Q	Secondary metabolites biosynthesis, transport and catabolism	cytochrome P450 705A5-like [Cucumis sativus]
CsaV3_3G034160	up	chr3	29098701	29098787	-	0.000131	0.231542	8	0.48242	0.25088	--	--	--	--	CsaV3_3G034160|+	--	up	[G]	Carbohydrate transport and metabolism	Molecular Function: inorganic phosphate transmembrane transporter activity (GO:0005315);; Cellular Component: plastid (GO:0009536);; Cellular Component: integral component of membrane (GO:0016021);;	K08193|1.5e-294|csv:101216550|K08193 MFS transporter, ACS family, solute carrier family 17 (sodium-dependent inorganic phosphate cotransporter), other | (RefSeq) probable anion transporter 3, chloroplastic	--	[G]	Carbohydrate transport and metabolism	Major Facilitator Superfamily	Probable anion transporter 3, chloroplastic OS=Arabidopsis thaliana OX=3702 GN=ANTR3 PE=2 SV=2	G	Carbohydrate transport and metabolism	probable anion transporter 3, chloroplastic [Cucumis sativus]
CsaV3_3G036350	down	chr3	30231656	30231797	-	7.91e-06	-0.1755	20	0.34615	0.52165	--	CsaV3_3G036350|	--	--	CsaV3_3G036350|-	--	down	--	--	Molecular Function: UDP-glycosyltransferase activity (GO:0008194);; Cellular Component: intracellular membrane-bounded organelle (GO:0043231);;	K22771|2.6e-203|cmos:111442360|K22771 flavonol-3-O-L-rhamnoside-7-O-glucosyltransferase [EC:2.4.1.-] | (RefSeq) UDP-glycosyltransferase 73C6-like	Flavone and flavonol biosynthesis (ko00944)	[GC]	Carbohydrate transport and metabolism;; Energy production and conversion	UDP-glucoronosyl and UDP-glucosyl transferase	UDP-glycosyltransferase 73C6 OS=Arabidopsis thaliana OX=3702 GN=UGT73C6 PE=2 SV=1	--	--	hypothetical protein Csa_002696 [Cucumis sativus]
CsaV3_3G036350	down	chr3	30235964	30236049	-	7.39e-05	-0.112907	18	0.1517	0.26461	--	--	--	CsaV3_3G036360|	--	CsaV3_3G036350|	down
CsaV3_3G037420	down	chr3	30913689	30913762	-	0.00017817	-0.220889	9	0.40011	0.621	--	--	--	--	CsaV3_3G037420|+	--	up	--	--	Molecular Function: microtubule motor activity (GO:0003777);; Molecular Function: ATP binding (GO:0005524);; Cellular Component: kinesin complex (GO:0005871);; Cellular Component: microtubule (GO:0005874);; Biological Process: microtubule-based movement (GO:0007018);; Molecular Function: microtubule binding (GO:0008017);; Molecular Function: ATP-dependent microtubule motor activity, plus-end-dire…	K10398|0.0e+00|csv:101203106|K10398 kinesin family member 11 | (RefSeq) kinesin-like protein KIN-5C	--	[Z]	Cytoskeleton	Kinesin motor domain	Kinesin-like protein KIN-5C OS=Nicotiana tabacum OX=4097 GN=KIN5C PE=1 SV=1	Z	Cytoskeleton	kinesin-like protein KIN-5C [Cucumis sativus]
CsaV3_3G037420	down	chr3	30914018	30914148	-	4.83e-07	-0.16298	17	0.16127	0.32425	--	--	--	--	CsaV3_3G037420|+	CsaV3_3G037420|	up
CsaV3_3G037630	down	chr3	31036560	31036663	-	0.047042	-0.198056	6	0.258	0.45606	--	--	--	CsaV3_3G037630|	--	--	up	[IQR]	Lipid transport and metabolism;; Secondary metabolites biosynthesis, transport and catabolism;; General function prediction only	Molecular Function: oxidoreductase activity (GO:0016491);;	K13070|1.6e-80|dosa:Os04t0179200-01|K13070 momilactone-A synthase [EC:1.1.1.295] | (RefSeq) Os04g0179200, MAS, MOMILACTONE_A_SYNTHASE; Similar to Stem secoisolariciresinol dehydrogenase (Fragment).	Diterpenoid biosynthesis (ko00904)	[R]	General function prediction only	Enoyl-(Acyl carrier protein) reductase	Secoisolariciresinol dehydrogenase (Fragment) OS=Forsythia intermedia OX=55183 PE=1 SV=1	Q	Secondary metabolites biosynthesis, transport and catabolism	hypothetical protein Csa_002484 [Cucumis sativus]
CsaV3_3G040550	up	chr3	33231657	33231816	-	0.0013935	0.188529	17	0.57502	0.38649	--	--	--	--	CsaV3_3G040560|-	CsaV3_3G040550|	up	--	--	Molecular Function: metal ion binding (GO:0046872);;	--	--	--	--	--	--	S	Function unknown	protein SRC1 [Cucumis sativus]
CsaV3_3G040550	up	chr3	33232156	33232251	-	0.0047397	0.262556	15	0.61031	0.34776	--	--	--	--	CsaV3_3G040560|-	CsaV3_3G040550|	up
CsaV3_3G041280	up	chr3	33676465	33676542	-	6.1e-05	0.11925	16	0.99792	0.87867	--	--	--	CsaV3_3G041280|	--	--	down	--	--	Molecular Function: DNA binding (GO:0003677);; Cellular Component: nucleus (GO:0005634);; Biological Process: regulation of transcription, DNA-templated (GO:0006355);;	K00521|6.8e-34|cmos:111447866|K00521 ferric-chelate reductase [EC:1.16.1.7] | (RefSeq) ferric reduction oxidase 7, chloroplastic-like	--	--	--	No apical meristem (NAM) protein	NAC domain-containing protein 100 OS=Arabidopsis thaliana OX=3702 GN=NAC100 PE=2 SV=1	K	Transcription	NAC domain-containing protein 100 isoform X1 [Cucumis sativus]
CsaV3_3G042690	up	chr3	34640164	34640354	-	0.026954	0.159968	21	0.71076	0.55079	--	--	--	--	CsaV3_3G042690|+	--	up
CsaV3_3G043680	up	chr3	35525942	35526016	-	0.021448	0.211818	11	0.63324	0.42142	--	--	--	--	CsaV3_3G043680|-	CsaV3_3G043670|	up	--	--	Biological Process: stomatal complex development (GO:0010374);;	--	--	--	--	Epidermal patterning factor proteins	EPIDERMAL PATTERNING FACTOR-like protein 3 OS=Arabidopsis thaliana OX=3702 GN=EPFL3 PE=1 SV=1	S	Function unknown	EPIDERMAL PATTERNING FACTOR-like protein 3 [Cucumis sativus]
CsaV3_3G043740	down	chr3	35607705	35608048	-	0.011245	-0.132689	15	0.16933	0.30202	--	CsaV3_3G043740|	--	--	CsaV3_3G043740|-	--	down	[E]	Amino acid transport and metabolism	Cellular Component: cytoplasm (GO:0005737);; Biological Process: proteolysis (GO:0006508);; Molecular Function: zinc ion binding (GO:0008270);; Molecular Function: peptide binding (GO:0042277);; Biological Process: peptide catabolic process (GO:0043171);; Molecular Function: metalloaminopeptidase activity (GO:0070006);;	K08776|0.0e+00|csv:101211362|K08776 puromycin-sensitive aminopeptidase [EC:3.4.11.-] | (RefSeq) aminopeptidase M1 isoform X1	--	[EO]	Amino acid transport and metabolism;; Posttranslational modification, protein turnover, chaperones	Peptidase family M1 domain	Aminopeptidase M1 OS=Arabidopsis thaliana OX=3702 GN=APM1 PE=1 SV=1	--	--	aminopeptidase M1 isoform X1 [Cucumis sativus]
CsaV3_3G044530	down	chr3	36400476	36400581	-	0.0095087	-0.124283	20	0.71463	0.83892	--	--	--	--	CsaV3_3G044530|+	--	down	--	--	Molecular Function: DNA binding (GO:0003677);; Molecular Function: transcription factor activity, sequence-specific DNA binding (GO:0003700);; Cellular Component: nucleus (GO:0005634);;	K00521|6.9e-43|cmos:111447866|K00521 ferric-chelate reductase [EC:1.16.1.7] | (RefSeq) ferric reduction oxidase 7, chloroplastic-like	--	--	--	No apical meristem (NAM) protein	NAC transcription factor 56 OS=Arabidopsis thaliana OX=3702 GN=NAC056 PE=2 SV=1	K	Transcription	NAC transcription factor 56 [Cucumis sativus]
CsaV3_3G044650	up	chr3	36533956	36534198	-	0.0041803	0.124167	38	0.68461	0.56045	--	--	--	--	CsaV3_3G044650|+	--	down	[QV]	Secondary metabolites biosynthesis, transport and catabolism;; Defense mechanisms	Molecular Function: iron ion binding (GO:0005506);; Cellular Component: membrane (GO:0016020);; Molecular Function: oxidoreductase activity, acting on paired donors, with incorporation or reduction of molecular oxygen, NAD(P)H as one donor, and incorporation of one atom of oxygen (GO:0016709);; Molecular Function: heme binding (GO:0020037);; Biological Process: defense response to other organism …	K23136|6.8e-144|pop:18104964|K23136 fraxetin 5-hydroxylase [EC:1.14.14.164] | (RefSeq) cytochrome P450 82C4	--	[Q]	Secondary metabolites biosynthesis, transport and catabolism	Cytochrome P450	Cytochrome P450 82A3 OS=Glycine max OX=3847 GN=CYP82A3 PE=2 SV=1	Q	Secondary metabolites biosynthesis, transport and catabolism	cytochrome P450 CYP82D47 [Cucumis sativus]
CsaV3_3G044650	down	chr3	36535506	36535654	-	0.021265	-0.226939	11	0.45373	0.68067	--	--	--	--	CsaV3_3G044650|+	--	down
CsaV3_3G044650	up	chr3	36536331	36536438	-	0.0018061	0.103444	21	0.25884	0.1554	--	--	--	--	CsaV3_3G044650|+	--	down
CsaV3_3G044870	up	chr3	36677571	36677672	-	0.0018894	0.102537	18	0.93519	0.83265	--	--	--	--	CsaV3_3G044870|-	--	up	[M]	Cell wall/membrane/envelope biogenesis	Cellular Component: Golgi apparatus (GO:0005794);; Molecular Function: transferase activity, transferring glycosyl groups (GO:0016757);;	K20893|1.1e-200|csv:101211531|K20893 probable galacturonosyltransferase-like 1 [EC:2.4.1.-] | (RefSeq) probable galacturonosyltransferase-like 1	--	--	--	Glycosyl transferase family 8	Probable galacturonosyltransferase-like 1 OS=Arabidopsis thaliana OX=3702 GN=GATL1 PE=2 SV=1	G	Carbohydrate transport and metabolism	probable galacturonosyltransferase-like 1 [Cucumis sativus]
CsaV3_3G044870	up	chr3	36680879	36681044	-	0.002303	0.196087	23	0.52025	0.32416	--	CsaV3_3G044870|	--	--	CsaV3_3G044870|-	--	up
CsaV3_3G045320	up	chr3	37006135	37006235	-	0.0048609	0.19141	13	0.42708	0.23567	--	CsaV3_3G045300|	--	--	CsaV3_3G045320|+	CsaV3_3G045310|	down	--	--	Biological Process: anaerobic respiration (GO:0009061);;	--	--	--	--	--	--	--	--	uncharacterized protein LOC101222738 [Cucumis sativus]
CsaV3_3G045320	down	chr3	37010295	37010363	-	0.0037272	-0.203649	19	0.31653	0.52018	--	--	--	--	CsaV3_3G045320|+	--	down
CsaV3_3G046630	down	chr3	38049182	38049235	-	0.0055802	-0.195556	6	0.19683	0.39239	--	CsaV3_3G046640|	--	--	CsaV3_3G046640|-	CsaV3_3G046630|	down	--	--	Cellular Component: nucleus (GO:0005634);; Biological Process: response to wounding (GO:0009611);; Biological Process: regulation of defense response (GO:0031347);; Biological Process: regulation of jasmonic acid mediated signaling pathway (GO:2000022);;	--	--	--	--	tify domain	Protein TIFY 8 OS=Arabidopsis thaliana OX=3702 GN=TIFY8 PE=1 SV=1	S	Function unknown	protein TIFY 8 isoform X3 [Cucumis sativus]
CsaV3_3G046980	up	chr3	38334010	38334113	-	3.24e-07	0.332481	9	0.4443	0.11181	--	--	--	--	CsaV3_3G046980|-	--	up	--	--	Biological Process: double-strand break repair via homologous recombination (GO:0000724);; Cellular Component: chromosome, telomeric region (GO:0000781);; Molecular Function: single-stranded DNA binding (GO:0003697);; Cellular Component: nucleus (GO:0005634);; Cellular Component: DNA replication factor A complex (GO:0005662);; Biological Process: DNA replication (GO:0006260);; Biological Process:…	K10739|6.1e-149|csv:101220176|K10739 replication factor A2 | (RefSeq) replication protein A 32 kDa subunit A	DNA replication (ko03030);; Nucleotide excision repair (ko03420);; Mismatch repair (ko03430);; Homologous recombination (ko03440)	[L]	Replication, recombination and repair	Replication protein A C terminal	Replication protein A 32 kDa subunit A OS=Arabidopsis thaliana OX=3702 GN=RPA2A PE=1 SV=2	L	Replication, recombination and repair	replication protein A 32 kDa subunit A [Cucumis sativus]
CsaV3_3G046980	down	chr3	38342096	38342172	-	0.01326	-0.10919	14	0.57905	0.68824	--	--	--	CsaV3_3G046980|	--	CsaV3_3G046990|	up
CsaV3_3G048350	up	chr3	39490138	39490228	-	0.001005	0.172467	10	0.30903	0.13657	--	--	--	--	CsaV3_3G048350|+	--	down	--	--	Cellular Component: integral component of membrane (GO:0016021);;	K14209|2.8e-08|obr:102700331|K14209 solute carrier family 36 (proton-coupled amino acid transporter) | (RefSeq) amino acid transporter ANTL2-like	--	[E]	Amino acid transport and metabolism	Transmembrane amino acid transporter protein	Amino acid permease 6 OS=Arabidopsis thaliana OX=3702 GN=AAP6 PE=1 SV=1	E	Amino acid transport and metabolism	amino acid permease 6 [Cucumis sativus]
CsaV3_3G048350	down	chr3	39491592	39491683	-	0.019356	-0.122417	12	0.33811	0.46053	--	--	--	--	CsaV3_3G048350|+	--	down
CsaV3_3G048790	up	chr3	39783550	39783634	-	0.0065184	0.212583	12	0.56553	0.35294	--	CsaV3_3G048780|	--	--	CsaV3_3G048780|-	CsaV3_3G048790|,CsaV3_3G048770|	up	--	--	Molecular Function: zinc ion binding (GO:0008270);; Biological Process: RNA modification (GO:0009451);; Cellular Component: intracellular membrane-bounded organelle (GO:0043231);;	K10683|8.0e-109|cic:CICLE_v10014038mg|K10683 BRCA1-associated RING domain protein 1 | (RefSeq) hypothetical protein	Homologous recombination (ko03440)	[R]	General function prediction only	PPR repeat family	Pentatricopeptide repeat-containing protein At1g31920 OS=Arabidopsis thaliana OX=3702 GN=PCMP-H11 PE=2 SV=1	S	Function unknown	pentatricopeptide repeat-containing protein At1g31920 [Cucumis sativus]
CsaV3_3G049280	down	chr3	40151497	40151579	-	6.99e-06	-0.123098	17	0.61841	0.74151	--	CsaV3_3G049270|	--	--	CsaV3_3G049280|+	--	up	[E]	Amino acid transport and metabolism	Molecular Function: hydrolase activity (GO:0016787);;	K01438|2.8e-260|csv:101220309|K01438 acetylornithine deacetylase [EC:3.5.1.16] | (RefSeq) acetylornithine deacetylase	Arginine biosynthesis (ko00220);; 2-Oxocarboxylic acid metabolism (ko01210);; Biosynthesis of amino acids (ko01230)	[E]	Amino acid transport and metabolism	Peptidase family M20/M25/M40	Acetylornithine deacetylase OS=Arabidopsis thaliana OX=3702 GN=At4g17830 PE=2 SV=1	E	Amino acid transport and metabolism	acetylornithine deacetylase [Cucumis sativus]
CsaV3_3G049400	up	chr3	40256067	40256176	-	0.00020964	0.194639	12	0.26686	0.072222	--	CsaV3_3G049400|,CsaV3_3G049380|	--	--	CsaV3_3G049400|-	CsaV3_3G049390|	up	[QV]	Secondary metabolites biosynthesis, transport and catabolism;; Defense mechanisms	Molecular Function: monooxygenase activity (GO:0004497);; Molecular Function: iron ion binding (GO:0005506);; Cellular Component: endoplasmic reticulum (GO:0005783);; Biological Process: multicellular organism development (GO:0007275);; Biological Process: brassinosteroid homeostasis (GO:0010268);; Biological Process: sterol metabolic process (GO:0016125);; Biological Process: brassinosteroid bio…	K04123|8.6e-284|csv:101206798|K04123 ent-kaurenoic acid monooxygenase [EC:1.14.14.107] | (RefSeq) beta-amyrin 11-oxidase	Diterpenoid biosynthesis (ko00904)	[QI]	Secondary metabolites biosynthesis, transport and catabolism;; Lipid transport and metabolism	Cytochrome P450	Beta-amyrin 11-oxidase OS=Glycyrrhiza uralensis OX=74613 GN=CYP88D6 PE=1 SV=1	Q	Secondary metabolites biosynthesis, transport and catabolism	hypothetical protein Csa_001467 [Cucumis sativus]
CsaV3_4G000970	up	chr4	523254	523313	-	3.1e-06	0.192818	11	0.32918	0.13636	--	--	--	CsaV3_4G000960|,CsaV3_4G000970|	--	--	down	[M]	Cell wall/membrane/envelope biogenesis	Biological Process: sucrose metabolic process (GO:0005985);; Molecular Function: sucrose synthase activity (GO:0016157);;	K00695|0.0e+00|csv:101203847|K00695 sucrose synthase [EC:2.4.1.13] | (RefSeq) sucrose synthase 2-like	Starch and sucrose metabolism (ko00500)	[M]	Cell wall/membrane/envelope biogenesis	Sucrose synthase	Sucrose synthase 2 OS=Pisum sativum OX=3888 GN=SUS2 PE=2 SV=1	M	Cell wall/membrane/envelope biogenesis	sucrose synthase 2-like [Cucumis sativus]
CsaV3_4G000970	up	chr4	523645	523809	-	0.0021591	0.241639	12	0.411	0.16936	--	--	--	CsaV3_4G000960|,CsaV3_4G000970|	--	--	down
CsaV3_4G000970	down	chr4	532773	532832	-	0.005134	-0.104714	7	0.87586	0.98057	--	--	--	--	CsaV3_4G000980|+	CsaV3_4G000970|	down
CsaV3_4G000970	up	chr4	532895	533095	-	0.020145	0.156704	18	0.73811	0.58141	--	--	--	--	CsaV3_4G000980|+	CsaV3_4G000970|	down
CsaV3_4G001030	up	chr4	574921	575001	-	0.027466	0.187051	13	0.46269	0.27564	--	--	--	--	CsaV3_4G001030|+	--	up	[N]	Cell motility	Cellular Component: integral component of membrane (GO:0016021);; Molecular Function: cellulose synthase (UDP-forming) activity (GO:0016760);; Biological Process: cellulose biosynthetic process (GO:0030244);; Biological Process: cell wall organization (GO:0071555);;	K00770|0.0e+00|csv:101223149|K00770 1,4-beta-D-xylan synthase [EC:2.4.2.24] | (RefSeq) cellulose synthase-like protein D5	Amino sugar and nucleotide sugar metabolism (ko00520)	--	--	Cellulose synthase	Cellulose synthase-like protein D5 OS=Arabidopsis thaliana OX=3702 GN=CSLD5 PE=2 SV=1	G	Carbohydrate transport and metabolism	cellulose synthase-like protein D5 [Cucumis sativus]
CsaV3_4G001400	up	chr4	798578	798634	-	3.47e-07	0.117222	21	0.73648	0.61925	--	CsaV3_4G001390|	--	--	CsaV3_4G001400|+	--	down	--	--	Molecular Function: metal ion binding (GO:0046872);;	K19720|3.9e-09|cvr:CHLNCDRAFT_142094|K19720 collagen type III alpha | (RefSeq) hypothetical protein	--	[R]	General function prediction only	Zn-finger in Ran binding protein and others	--	S	Function unknown	hypothetical protein Csa_014917 [Cucumis sativus]
CsaV3_4G001400	up	chr4	800051	800143	-	0.0039851	0.165949	13	0.38682	0.22087	--	--	--	--	CsaV3_4G001400|+	CsaV3_4G001400|	down
CsaV3_4G010510	up	chr4	8386315	8386384	-	0.024011	0.250333	7	0.79014	0.53981	--	CsaV3_4G010500|	--	--	CsaV3_4G010510|+	--	down	--	--	--	--	--	--	--	--	--	--	--	hypothetical protein Csa_015192 [Cucumis sativus]
CsaV3_4G010510	up	chr4	8395306	8395373	-	0.00062707	0.244641	13	0.49644	0.25179	--	--	--	--	CsaV3_4G010510|+	--	down
CsaV3_4G010510	down	chr4	8398812	8399102	-	0.026954	-0.124288	22	0.61002	0.7343	--	--	--	--	CsaV3_4G010510|+	--	down
CsaV3_4G023500	up	chr4	13693663	13693728	-	0.0049407	0.260048	7	0.87462	0.61457	--	--	--	CsaV3_4G023490|	--	CsaV3_4G023500|	up	--	--	Cellular Component: apoplast (GO:0048046);;	K01870|2.0e-45|csat:104723377|K01870 isoleucyl-tRNA synthetase [EC:6.1.1.5] | (RefSeq) isoleucine--tRNA ligase, chloroplastic/mitochondrial-like	Aminoacyl-tRNA biosynthesis (ko00970)	--	--	Dirigent-like protein	Dirigent protein 19 OS=Arabidopsis thaliana OX=3702 GN=DIR19 PE=2 SV=1	S	Function unknown	dirigent protein 19 [Cucumis sativus]
CsaV3_4G025540	up	chr4	15009254	15009312	-	0.01056	0.122813	16	0.37444	0.25163	--	--	--	--	CsaV3_4G025540|-	CsaV3_4G025530|	down	[E]	Amino acid transport and metabolism	Molecular Function: peptide:proton symporter activity (GO:0015333);; Cellular Component: integral component of membrane (GO:0016021);; Molecular Function: oligopeptide transmembrane transporter activity (GO:0035673);; Molecular Function: peptide transmembrane transporter activity (GO:1904680);;	K14638|6.4e-231|cann:107843454|K14638 solute carrier family 15 (peptide/histidine transporter), member 3/4 | (RefSeq) protein NRT1/ PTR FAMILY 5.6-like	--	[E]	Amino acid transport and metabolism	POT family	Protein NRT1/ PTR FAMILY 5.6 OS=Arabidopsis thaliana OX=3702 GN=NPF5.6 PE=2 SV=1	E	Amino acid transport and metabolism	protein NRT1/ PTR FAMILY 5.6 [Cucumis sativus]
CsaV3_4G026930	down	chr4	15986641	15986721	-	0.00048783	-0.115956	15	0.68293	0.79889	--	--	--	--	CsaV3_4G026930|+	--	up	--	--	--	--	--	--	--	Wound-induced protein WI12	--	S	Function unknown	hypothetical protein Csa_012333 [Cucumis sativus]
CsaV3_4G026930	down	chr4	15992577	15992647	-	3.62e-08	-0.228538	13	0.098436	0.32697	--	--	--	--	CsaV3_4G026930|+	--	up
CsaV3_4G027750	down	chr4	17074621	17074738	-	0.028137	-0.191567	10	0.43947	0.63103	--	--	--	--	CsaV3_4G027750|-	CsaV3_4G027740|	down	[C]	Energy production and conversion	Biological Process: cytokinin metabolic process (GO:0009690);; Molecular Function: cytokinin dehydrogenase activity (GO:0019139);; Molecular Function: FAD binding (GO:0071949);;	K00279|0.0e+00|csv:101222887|K00279 cytokinin dehydrogenase [EC:1.5.99.12] | (RefSeq) cytokinin dehydrogenase 9	Zeatin biosynthesis (ko00908)	[C]	Energy production and conversion	Cytokinin dehydrogenase 1, FAD and cytokinin binding	Cytokinin dehydrogenase 1 OS=Arabidopsis thaliana OX=3702 GN=CKX1 PE=1 SV=1	C	Energy production and conversion	hypothetical protein Csa_012707 [Cucumis sativus]
CsaV3_4G027750	up	chr4	17075326	17075391	-	0.00016372	0.231333	11	0.78291	0.55158	--	--	--	--	CsaV3_4G027750|-	CsaV3_4G027740|	down
CsaV3_4G028360	up	chr4	17754005	17754087	-	0.0008908	0.101767	10	0.1333	0.031533	--	--	--	--	CsaV3_4G028360|+	--	up	--	--	Molecular Function: DNA binding (GO:0003677);; Molecular Function: transcription factor activity, sequence-specific DNA binding (GO:0003700);; Cellular Component: nucleus (GO:0005634);;	K09286|3.2e-21|eus:EUTSA_v10000354mg|K09286 EREBP-like factor | (RefSeq) hypothetical protein	--	--	--	AP2 domain	Ethylene-responsive transcription factor ERF012 OS=Arabidopsis thaliana OX=3702 GN=ERF012 PE=2 SV=1	K	Transcription	ethylene-responsive transcription factor ERF014 [Cucumis sativus]
CsaV3_4G028450	up	chr4	17837304	17837370	-	0.00093598	0.281762	7	0.5099	0.22814	--	--	--	--	CsaV3_4G028450|+	--	up	--	--	Biological Process: fucose metabolic process (GO:0006004);; Cellular Component: integral component of membrane (GO:0016021);; Molecular Function: transferase activity, transferring glycosyl groups (GO:0016757);;	K23280|1.8e-73|zma:103634607|K23280 rhamnogalacturonan I rhamnosyltransferase [EC:2.4.1.351] | (RefSeq) uncharacterized protein LOC103634607	--	--	--	GDP-fucose protein O-fucosyltransferase	O-fucosyltransferase 11 OS=Arabidopsis thaliana OX=3702 GN=OFUT11 PE=2 SV=1	G	Carbohydrate transport and metabolism	O-fucosyltransferase 10 [Cucumis sativus]
CsaV3_4G028450	up	chr4	17839695	17839807	-	0.0030305	0.120882	17	0.42314	0.30225	--	--	--	--	CsaV3_4G028450|+	--	up
CsaV3_4G031400	down	chr4	21839769	21839875	-	0.0021536	-0.241852	9	0.25989	0.50174	--	CsaV3_4G031390|	--	--	CsaV3_4G031400|+	--	down	[O]	Posttranslational modification, protein turnover, chaperones	Molecular Function: endopeptidase activity (GO:0004175);; Molecular Function: serine-type peptidase activity (GO:0008236);;	K03797|3.5e-286|csv:101223127|K03797 carboxyl-terminal processing protease [EC:3.4.21.102] | (RefSeq) carboxyl-terminal-processing peptidase 3, chloroplastic isoform X1	--	--	--	Peptidase family S41	Carboxyl-terminal-processing peptidase 3, chloroplastic OS=Arabidopsis thaliana OX=3702 GN=CTPA3 PE=3 SV=1	M	Cell wall/membrane/envelope biogenesis	hypothetical protein Csa_012688 [Cucumis sativus]
CsaV3_4G031400	up	chr4	21840963	21841082	-	6.62e-05	0.158262	14	0.22036	0.062095	--	--	--	--	CsaV3_4G031400|+	CsaV3_4G031400|	down
CsaV3_4G031400	up	chr4	21841085	21841168	-	9.78e-10	0.281667	19	0.49932	0.21765	--	--	--	--	CsaV3_4G031400|+	CsaV3_4G031400|	down
CsaV3_4G031400	up	chr4	21841193	21841447	-	8.39e-08	0.130685	36	0.84787	0.71719	--	--	--	--	CsaV3_4G031400|+	CsaV3_4G031400|	down
CsaV3_4G032670	up	chr4	23059013	23059097	-	0.027995	0.15363	9	0.48159	0.32796	--	--	--	CsaV3_4G032670|	--	--	down	[QV]	Secondary metabolites biosynthesis, transport and catabolism;; Defense mechanisms	Molecular Function: monooxygenase activity (GO:0004497);; Molecular Function: iron ion binding (GO:0005506);; Cellular Component: integral component of membrane (GO:0016021);; Molecular Function: oxidoreductase activity, acting on paired donors, with incorporation or reduction of molecular oxygen (GO:0016705);; Molecular Function: heme binding (GO:0020037);;	K07426|2.0e-193|cpep:111792333|K07426 cytochrome P450 family 4 subfamily B polypeptide 1 [EC:1.14.14.1] | (RefSeq) cytochrome P450 CYP72A219-like	--	[QI]	Secondary metabolites biosynthesis, transport and catabolism;; Lipid transport and metabolism	Cytochrome P450	Cytochrome P450 CYP72A219 OS=Panax ginseng OX=4054 PE=2 SV=1	Q	Secondary metabolites biosynthesis, transport and catabolism	cytochrome P450 CYP72A219 isoform X1 [Cucumis sativus]
CsaV3_4G032670	down	chr4	23082310	23082496	-	0.0061176	-0.166636	22	0.53782	0.70445	--	CsaV3_4G032690|	--	CsaV3_4G032670|	CsaV3_4G032700|-	--	down
CsaV3_4G032670	up	chr4	23083091	23083233	-	0.042564	0.182852	9	0.68404	0.50119	--	CsaV3_4G032690|	--	CsaV3_4G032670|	CsaV3_4G032700|-	--	down
CsaV3_4G032700	down	chr4	23082310	23082496	-	0.0061176	-0.166636	22	0.53782	0.70445	--	CsaV3_4G032690|	--	CsaV3_4G032670|	CsaV3_4G032700|-	--	up	--	--	Molecular Function: hydrolase activity (GO:0016787);;	K19891|4.6e-13|dzi:111287553|K19891 glucan endo-1,3-beta-glucosidase 1/2/3 [EC:3.2.1.39] | (RefSeq) glucan endo-1,3-beta-glucosidase 3-like isoform X1	Starch and sucrose metabolism (ko00500)	--	--	X8 domain	Glucan endo-1,3-beta-glucosidase OS=Triticum aestivum OX=4565 GN=GLC1 PE=2 SV=1	S	Function unknown	glucan endo-1,3-beta-D-glucosidase [Cucumis sativus]
CsaV3_4G032700	up	chr4	23083091	23083233	-	0.042564	0.182852	9	0.68404	0.50119	--	CsaV3_4G032690|	--	CsaV3_4G032670|	CsaV3_4G032700|-	--	up
CsaV3_4G033660	down	chr4	23849299	23849476	-	0.024166	-0.132614	19	0.71867	0.85128	--	--	--	--	CsaV3_4G033660|-	CsaV3_4G033650|	up	--	--	Molecular Function: GTPase activity (GO:0003924);; Molecular Function: GTP binding (GO:0005525);;	K17065|2.1e-17|bvg:104905977|K17065 dynamin 1-like protein [EC:3.6.5.5] | (RefSeq) dynamin-related protein 3A	--	[UR]	Intracellular trafficking, secretion, and vesicular transport;; General function prediction only	Dynamin family	Dynamin-related protein 5A OS=Arabidopsis thaliana OX=3702 GN=DRP5A PE=2 SV=1	U	Intracellular trafficking, secretion, and vesicular transport	hypothetical protein Csa_012114 [Cucumis sativus]
CsaV3_4G033660	down	chr4	23855930	23856025	-	0.047042	-0.123	15	0.47931	0.60231	--	--	--	--	CsaV3_4G033660|-	--	up
CsaV3_4G033660	up	chr4	23856885	23856995	-	0.028179	0.1895	12	0.47681	0.28731	--	--	--	--	CsaV3_4G033660|-	--	up
CsaV3_4G033660	up	chr4	23858778	23858931	-	0.028313	0.117083	16	0.23429	0.11721	--	--	--	--	CsaV3_4G033660|-	--	up
CsaV3_4G033900	up	chr4	24016588	24016699	-	0.038779	0.172053	19	0.73737	0.56532	--	CsaV3_4G033900|	--	--	CsaV3_4G033900|-	--	up	--	--	Cellular Component: integral component of membrane (GO:0016021);;	--	--	--	--	Protein of unknown function (DUF1218)	--	S	Function unknown	uncharacterized protein LOC101208795 [Cucumis sativus]
CsaV3_4G035310	up	chr4	24874529	24874763	-	0.026231	0.162458	16	0.37692	0.21446	--	CsaV3_4G035300|	--	--	CsaV3_4G035310|+	--	up	--	--	Molecular Function: transcription factor activity, sequence-specific DNA binding (GO:0003700);; Cellular Component: nucleus (GO:0005634);; Molecular Function: protein dimerization activity (GO:0046983);;	K18878|3.4e-31|cann:107866053|K18878 BHLH transcription factor Upa20 | (RefSeq) Upa20; transcription factor bHLH137-like	Plant-pathogen interaction (ko04626)	--	--	Helix-loop-helix DNA-binding domain	Transcription factor bHLH74 OS=Arabidopsis thaliana OX=3702 GN=BHLH74 PE=1 SV=1	K	Transcription	transcription factor bHLH74 [Cucumis sativus]
CsaV3_4G037240	up	chr4	26118473	26118651	-	0.0020559	0.208021	16	0.50706	0.29904	--	CsaV3_4G037240|	--	--	CsaV3_4G037240|-	CsaV3_4G037230|	up	--	--	Biological Process: regulation of cyclin-dependent protein serine/threonine kinase activity (GO:0000079);; Cellular Component: cyclin-dependent protein kinase holoenzyme complex (GO:0000307);; Cellular Component: nucleus (GO:0005634);; Cellular Component: cytoplasm (GO:0005737);; Molecular Function: cyclin-dependent protein serine/threonine kinase regulator activity (GO:0016538);; Cellular Compon…	K21777|3.0e-246|csv:101223199|K21777 G2/mitotic-specific cyclin-B, other | (RefSeq) G2/mitotic-specific cyclin-2	--	[D]	Cell cycle control, cell division, chromosome partitioning	Cyclin, N-terminal domain	Cyclin-B2-4 OS=Arabidopsis thaliana OX=3702 GN=CYCB2-4 PE=2 SV=2	D	Cell cycle control, cell division, chromosome partitioning	G2/mitotic-specific cyclin-2 [Cucumis sativus]
CsaV3_5G000940	up	chr5	458926	459115	-	0.011867	0.112238	28	0.68183	0.5696	--	--	--	--	CsaV3_5G000950|+	CsaV3_5G000940|	up	[V]	Defense mechanisms	Biological Process: cellular ion homeostasis (GO:0006873);; Molecular Function: voltage-gated anion channel activity (GO:0008308);; Cellular Component: integral component of membrane (GO:0016021);;	--	--	--	--	Voltage-dependent anion channel	S-type anion channel SLAH3 OS=Arabidopsis thaliana OX=3702 GN=SLAH3 PE=1 SV=1	S	Function unknown	S-type anion channel SLAH2 [Cucumis sativus]
CsaV3_5G002080	down	chr5	1258888	1259016	-	6.46e-06	-0.121986	24	0.82638	0.94836	--	--	CsaV3_5G002070.1.exon1	CsaV3_5G002070|	--	CsaV3_5G002080|	up	[G]	Carbohydrate transport and metabolism	Molecular Function: polygalacturonase activity (GO:0004650);; Cellular Component: extracellular region (GO:0005576);; Biological Process: carbohydrate metabolic process (GO:0005975);; Biological Process: cell wall organization (GO:0071555);;	K01184|2.0e-32|cam:101509627|K01184 polygalacturonase [EC:3.2.1.15] | (RefSeq) probable polygalacturonase At3g15720	Pentose and glucuronate interconversions (ko00040)	--	--	Glycosyl hydrolases family 28	Probable polygalacturonase OS=Vitis vinifera OX=29760 GN=GSVIVT00026920001 PE=1 SV=1	G	Carbohydrate transport and metabolism	probable polygalacturonase [Cucumis sativus]
CsaV3_5G002340	down	chr5	1418170	1418308	-	0.00020738	-0.238316	19	0.66782	0.90614	--	CsaV3_5G002340|	--	--	CsaV3_5G002340|-	CsaV3_5G002330|	up	--	--	Cellular Component: integral component of membrane (GO:0016021);;	--	--	--	--	Late embryogenesis abundant protein	--	--	--	hypothetical protein Csa_000600 [Cucumis sativus]
CsaV3_5G002340	up	chr5	1418603	1418653	-	0.0015547	0.165889	18	0.85969	0.6938	--	CsaV3_5G002340|	--	--	CsaV3_5G002340|-	CsaV3_5G002330|	up
CsaV3_5G002430	up	chr5	1485225	1485347	-	3.45e-07	0.214267	15	0.62413	0.40987	--	--	--	--	CsaV3_5G002440|-	CsaV3_5G002430|	down	--	--	Biological Process: metal ion transport (GO:0030001);; Molecular Function: metal ion binding (GO:0046872);;	K11883|7.1e-07|nau:109216591|K11883 RNA-binding protein NOB1 | (RefSeq) RNA-binding protein NOB1 isoform X1	Ribosome biogenesis in eukaryotes (ko03008)	[P]	Inorganic ion transport and metabolism	Heavy-metal-associated domain	Heavy metal-associated isoprenylated plant protein 39 OS=Arabidopsis thaliana OX=3702 GN=HIPP39 PE=2 SV=1	P	Inorganic ion transport and metabolism	heavy metal-associated isoprenylated plant protein 39 isoform X1 [Cucumis sativus]
CsaV3_5G002550	down	chr5	1547269	1547359	-	0.00012359	-0.166128	26	0.59229	0.75842	CsaV3_5G002550.1.cds3	CsaV3_5G002560|	CsaV3_5G002550.1.exon3	CsaV3_5G002550|	--	--	up	--	--	Molecular Function: acetylglucosaminyltransferase activity (GO:0008375);; Cellular Component: integral component of membrane (GO:0016021);;	K14780|8.0e-86|dcr:108220614|K14780 ATP-dependent RNA helicase DHX37/DHR1 [EC:3.6.4.13] | (RefSeq) ATP-dependent RNA helicase DEAH13-like isoform X1	--	[G]	Carbohydrate transport and metabolism	Protein of unknown function, DUF604	--	G	Carbohydrate transport and metabolism	uncharacterized protein LOC101214810 [Cucumis sativus]
CsaV3_5G003790	up	chr5	2448312	2448461	-	0.013151	0.216548	14	0.66626	0.44971	--	--	--	--	CsaV3_5G003790|+	CsaV3_5G003790|	down	[Q]	Secondary metabolites biosynthesis, transport and catabolism	Molecular Function: copper ion binding (GO:0005507);; Molecular Function: primary amine oxidase activity (GO:0008131);; Biological Process: amine metabolic process (GO:0009308);; Molecular Function: quinone binding (GO:0048038);;	K00276|0.0e+00|csv:101213059|K00276 primary-amine oxidase [EC:1.4.3.21] | (RefSeq) primary amine oxidase	Glycine, serine and threonine metabolism (ko00260);; Tyrosine metabolism (ko00350);; Phenylalanine metabolism (ko00360);; beta-Alanine metabolism (ko00410);; Isoquinoline alkaloid biosynthesis (ko00950);; Tropane, piperidine and pyridine alkaloid biosynthesis (ko00960)	[Q]	Secondary metabolites biosynthesis, transport and catabolism	Copper amine oxidase, enzyme domain	Primary amine oxidase OS=Arabidopsis thaliana OX=3702 GN=At1g62810 PE=2 SV=1	Q	Secondary metabolites biosynthesis, transport and catabolism	primary amine oxidase [Cucumis sativus]
CsaV3_5G003900	down	chr5	2516360	2516476	-	0.012549	-0.156381	21	0.46354	0.61992	--	CsaV3_5G003890|	--	--	CsaV3_5G003900|+	--	up	[J]	Translation, ribosomal structure and biogenesis	Molecular Function: translation elongation factor activity (GO:0003746);; Molecular Function: GTPase activity (GO:0003924);; Molecular Function: GTP binding (GO:0005525);; Cellular Component: mitochondrion (GO:0005739);; Cellular Component: chloroplast (GO:0009507);; Biological Process: mitochondrial translation (GO:0032543);; Biological Process: ribosome disassembly (GO:0032790);;	K02355|0.0e+00|csv:101220931|K02355 elongation factor G | (RefSeq) elongation factor G-2, chloroplastic	--	[J]	Translation, ribosomal structure and biogenesis	Elongation factor Tu GTP binding domain	Elongation factor G-2, chloroplastic OS=Glycine max OX=3847 GN=fusA2 PE=3 SV=1	J	Translation, ribosomal structure and biogenesis	hypothetical protein Csa_000158 [Cucumis sativus]
CsaV3_5G004260	up	chr5	2827458	2827535	-	0.014032	0.133515	11	0.554	0.42048	--	--	--	--	CsaV3_5G004270|-	CsaV3_5G004260|	down	[O]	Posttranslational modification, protein turnover, chaperones	Molecular Function: metalloendopeptidase activity (GO:0004222);; Molecular Function: zinc ion binding (GO:0008270);; Biological Process: extracellular matrix organization (GO:0030198);; Biological Process: collagen catabolic process (GO:0030574);; Cellular Component: extracellular matrix (GO:0031012);;	K07999|5.3e-103|sly:101247669|K07999 matrix metalloproteinase-20 (enamelysin) [EC:3.4.24.-] | (RefSeq) metalloendoproteinase 4-MMP	--	[OW]	Posttranslational modification, protein turnover, chaperones;; Extracellular structures	Matrixin	Metalloendoproteinase 1-MMP OS=Arabidopsis thaliana OX=3702 GN=1MMP PE=1 SV=1	O	Posttranslational modification, protein turnover, chaperones	metalloendoproteinase 1-MMP [Cucumis sativus]
CsaV3_5G005230	down	chr5	3359395	3359498	-	0.0057558	-0.138619	14	0.69114	0.82976	--	--	--	--	CsaV3_5G005240|-	CsaV3_5G005230|	down	--	--	--	--	--	--	--	--	--	--	--	hypothetical protein Csa_000188 [Cucumis sativus]
CsaV3_5G005290	down	chr5	3394301	3394764	-	0.038619	-0.134944	12	0.108	0.24294	--	--	--	--	CsaV3_5G005300|-	CsaV3_5G005290|	up	--	--	--	--	--	--	--	--	--	--	--	probable serine/threonine-protein kinase kinX isoform X2 [Cucumis sativus]
CsaV3_5G005290	up	chr5	3394845	3394925	-	0.014549	0.190194	12	0.40111	0.21092	--	CsaV3_5G005300|	--	--	CsaV3_5G005300|-	CsaV3_5G005290|	up
CsaV3_5G005880	down	chr5	3885870	3885925	-	9.98e-06	-0.119667	10	0.047167	0.16683	--	--	--	--	CsaV3_5G005880|+	CsaV3_5G005880|	up	--	--	Molecular Function: chaperone binding (GO:0051087);;	--	--	[T]	Signal transduction mechanisms	BAG domain	BAG family molecular chaperone regulator 3 OS=Arabidopsis thaliana OX=3702 GN=BAG3 PE=1 SV=1	T	Signal transduction mechanisms	hypothetical protein Csa_000244 [Cucumis sativus]
CsaV3_5G010120	down	chr5	5851764	5851817	-	0.011221	-0.153792	8	0.61246	0.76625	--	CsaV3_5G010110|	--	--	CsaV3_5G010110|-	CsaV3_5G010120|	down	--	--	Cellular Component: nucleus (GO:0005634);; Biological Process: entrainment of circadian clock (GO:0009649);; Biological Process: regulation of flower development (GO:0009909);; Biological Process: red or far-red light signaling pathway (GO:0010017);; Biological Process: response to red light (GO:0010114);; Biological Process: positive regulation of circadian rhythm (GO:0042753);; Molecular Functi…	--	--	--	--	Early Flowering 4 domain	Protein EARLY FLOWERING 4 OS=Arabidopsis thaliana OX=3702 GN=ELF4 PE=1 SV=1	S	Function unknown	hypothetical protein Csa_005775 [Cucumis sativus]
CsaV3_5G010270	down	chr5	6149112	6149284	-	0.011077	-0.159536	23	0.46265	0.62219	--	--	--	--	CsaV3_5G010270|+	--	up	[T]	Signal transduction mechanisms	Molecular Function: protein serine/threonine phosphatase activity (GO:0004722);; Molecular Function: magnesium-dependent protein serine/threonine phosphatase activity (GO:0004724);; Molecular Function: metal ion binding (GO:0046872);;	K17506|2.0e-184|csv:101208170|K17506 protein phosphatase 1L [EC:3.1.3.16] | (RefSeq) probable protein phosphatase 2C 2	--	[T]	Signal transduction mechanisms	Protein phosphatase 2C	Probable protein phosphatase 2C 2 OS=Arabidopsis thaliana OX=3702 GN=At1g07160 PE=2 SV=1	T	Signal transduction mechanisms	probable protein phosphatase 2C 2 [Cucumis sativus]
CsaV3_5G010270	down	chr5	6149823	6150101	-	0.020113	-0.118149	38	0.38674	0.50489	--	--	--	--	CsaV3_5G010270|+	--	up
CsaV3_5G010270	down	chr5	6162903	6162954	-	0.02349	-0.189	7	0.68224	0.87124	--	CsaV3_5G010270|	--	--	CsaV3_5G010280|-	--	up
CsaV3_5G010690	up	chr5	6642512	6642588	-	0.0060046	0.182733	10	0.38447	0.20173	--	CsaV3_5G010670|	--	--	CsaV3_5G010690|+	CsaV3_5G010680|	up	--	--	Biological Process: amino acid transmembrane transport (GO:0003333);; Molecular Function: amino acid transmembrane transporter activity (GO:0015171);; Cellular Component: integral component of membrane (GO:0016021);;	K14207|2.4e-107|vvi:100264342|K14207 solute carrier family 38 (sodium-coupled neutral amino acid transporter), member 2 | (RefSeq) sodium-coupled neutral amino acid transporter 5	--	[E]	Amino acid transport and metabolism	Transmembrane amino acid transporter protein	Amino acid transporter AVT6C OS=Arabidopsis thaliana OX=3702 GN=AVT6C PE=2 SV=1	E	Amino acid transport and metabolism	amino acid transporter AVT6C-like isoform X2 [Cucumis sativus]
CsaV3_5G010690	up	chr5	6649212	6649271	-	0.018045	0.183833	6	0.91117	0.72733	--	--	--	CsaV3_5G010690|	--	--	up
CsaV3_5G011160	up	chr5	7163844	7164054	-	0.012571	0.126118	31	0.62102	0.4949	--	--	--	--	CsaV3_5G011160|+	CsaV3_5G011150|	up	[QV]	Secondary metabolites biosynthesis, transport and catabolism;; Defense mechanisms	Molecular Function: monooxygenase activity (GO:0004497);; Molecular Function: iron ion binding (GO:0005506);; Cellular Component: integral component of membrane (GO:0016021);; Molecular Function: oxidoreductase activity, acting on paired donors, with incorporation or reduction of molecular oxygen (GO:0016705);; Molecular Function: heme binding (GO:0020037);;	K20661|2.3e-309|csv:101216582|K20661 cytochrome P450 family 714 subfamily A polypeptide 1 | (RefSeq) cytochrome P450 714A1	--	[QI]	Secondary metabolites biosynthesis, transport and catabolism;; Lipid transport and metabolism	Cytochrome P450	Cytochrome P450 714A1 OS=Arabidopsis thaliana OX=3702 GN=CYP714A1 PE=2 SV=1	Q	Secondary metabolites biosynthesis, transport and catabolism	cytochrome P450 714A1 [Cucumis sativus]
CsaV3_5G011160	up	chr5	7172839	7172944	-	1.78e-10	0.184845	28	0.92099	0.73614	--	--	--	--	CsaV3_5G011160|+	--	up
CsaV3_5G013600	down	chr5	10304922	10305242	-	0.047042	-0.127698	21	0.17073	0.29843	--	--	--	--	CsaV3_5G013600|+	--	down	--	--	--	--	--	--	--	Domain of unknown function (DUF4228)	Uncharacterized protein At1g66480 OS=Arabidopsis thaliana OX=3702 GN=At1g66480 PE=2 SV=1	S	Function unknown	uncharacterized protein At1g66480 [Cucumis sativus]
CsaV3_5G013600	up	chr5	10308675	10308818	-	0.026323	0.116778	12	0.40503	0.28825	--	--	--	--	CsaV3_5G013600|+	--	down
CsaV3_5G013600	up	chr5	10316813	10316890	-	1.96e-05	0.168183	20	0.70452	0.53633	--	--	--	--	CsaV3_5G013600|+	--	down
CsaV3_5G013600	up	chr5	10318203	10318317	-	0.010182	0.227697	11	0.47142	0.24373	--	--	--	--	CsaV3_5G013600|+	--	down
CsaV3_5G013600	down	chr5	10320417	10320538	-	0.0014419	-0.125931	24	0.67668	0.80261	--	--	--	--	CsaV3_5G013600|+	--	down
CsaV3_5G013600	up	chr5	10328010	10328444	-	0.0015684	0.180087	23	0.41207	0.23199	--	CsaV3_5G013600|	--	--	CsaV3_5G013610|-	--	down
CsaV3_5G013600	up	chr5	10328972	10329032	-	0.014487	0.103857	7	0.24629	0.14243	--	CsaV3_5G013600|	--	--	CsaV3_5G013610|-	--	down
CsaV3_5G015150	down	chr5	12329036	12329088	-	0.0030024	-0.185714	14	0.62664	0.81236	--	--	--	--	CsaV3_5G015150|-	CsaV3_5G015140|	up	[J]	Translation, ribosomal structure and biogenesis	Molecular Function: protein kinase activity (GO:0004672);; Molecular Function: ATP binding (GO:0005524);; Cellular Component: integral component of membrane (GO:0016021);;	K13415|1.3e-37|mus:103980973|K13415 protein brassinosteroid insensitive 1 [EC:2.7.10.1 2.7.11.1] | (RefSeq) systemin receptor SR160-like	Plant hormone signal transduction (ko04075)	--	--	Protein kinase domain	Inactive leucine-rich repeat receptor-like serine/threonine-protein kinase At1g60630 OS=Arabidopsis thaliana OX=3702 GN=At1g60630 PE=2 SV=1	T	Signal transduction mechanisms	hypothetical protein Csa_018405 [Cucumis sativus]
CsaV3_5G020420	up	chr5	15282318	15282369	-	0.0006845	0.282667	5	0.77267	0.49	--	--	--	--	CsaV3_5G020420|+	CsaV3_5G020410|	down	[M]	Cell wall/membrane/envelope biogenesis	Cellular Component: cell wall (GO:0005618);; Biological Process: sucrose metabolic process (GO:0005985);; Molecular Function: sucrose synthase activity (GO:0016157);; Biological Process: callose deposition in phloem sieve plate (GO:0080165);;	K00695|0.0e+00|csv:101211461|K00695 sucrose synthase [EC:2.4.1.13] | (RefSeq) sucrose synthase 5-like	Starch and sucrose metabolism (ko00500)	[M]	Cell wall/membrane/envelope biogenesis	Sucrose synthase	Sucrose synthase 5 OS=Arabidopsis thaliana OX=3702 GN=SUS5 PE=2 SV=1	M	Cell wall/membrane/envelope biogenesis	sucrose synthase 5-like isoform X2 [Cucumis sativus]
CsaV3_5G020420	down	chr5	15282931	15282985	-	0.00092407	-0.219905	7	0.26381	0.48371	--	--	--	--	CsaV3_5G020420|+	--	down
CsaV3_5G020420	down	chr5	15291738	15291857	-	0.011321	-0.168625	8	0.23571	0.40433	--	--	--	--	CsaV3_5G020420|+	--	down
CsaV3_5G020420	up	chr5	15298425	15298526	-	7.36e-06	0.128882	17	0.88873	0.75984	--	--	--	--	CsaV3_5G020420|+	CsaV3_5G020420|	down
CsaV3_5G021890	down	chr5	16585299	16585391	-	2.75e-07	-0.122538	26	0.81881	0.94135	--	--	--	--	CsaV3_5G021890|+	--	up	--	--	Molecular Function: DNA binding (GO:0003677);; Cellular Component: nucleus (GO:0005634);;	K11296|1.5e-91|csv:101220938|K11296 high mobility group protein B3 | (RefSeq) high mobility group B protein 7	--	[R]	General function prediction only	HMG (high mobility group) box	High mobility group B protein 7 OS=Arabidopsis thaliana OX=3702 GN=HMGB7 PE=1 SV=1	K	Transcription	high mobility group B protein 7 [Cucumis sativus]
CsaV3_5G024980	down	chr5	19972142	19972238	-	5.09e-06	-0.132926	18	0.74059	0.87352	--	--	--	--	CsaV3_5G024980|-	--	up	[T]	Signal transduction mechanisms	Molecular Function: transmembrane receptor protein serine/threonine kinase activity (GO:0004675);; Molecular Function: ATP binding (GO:0005524);; Cellular Component: plasma membrane (GO:0005886);; Biological Process: protein phosphorylation (GO:0006468);; Cellular Component: integral component of membrane (GO:0016021);;	K13430|1.5e-49|sot:102595931|K13430 serine/threonine-protein kinase PBS1 [EC:2.7.11.1] | (RefSeq) serine/threonine-protein kinase PBS1	Plant-pathogen interaction (ko04626)	[T]	Signal transduction mechanisms	Protein tyrosine and serine/threonine kinase	Proline-rich receptor-like protein kinase PERK8 OS=Arabidopsis thaliana OX=3702 GN=PERK8 PE=1 SV=1	T	Signal transduction mechanisms	hypothetical protein Csa_008967 [Cucumis sativus]
CsaV3_5G024980	up	chr5	19984587	19984686	-	0.020241	0.158	5	0.55487	0.39687	--	--	--	--	CsaV3_5G024990|-	CsaV3_5G024980|	up
CsaV3_5G026450	up	chr5	21598713	21598776	-	0.00019736	0.171604	16	0.42429	0.25269	--	--	--	--	CsaV3_5G026450|+	--	down	[O]	Posttranslational modification, protein turnover, chaperones	Molecular Function: ATP binding (GO:0005524);; Cellular Component: cytoplasm (GO:0005737);; Biological Process: response to unfolded protein (GO:0006986);; Molecular Function: ATPase activity (GO:0016887);; Molecular Function: heat shock protein binding (GO:0031072);; Biological Process: cellular response to unfolded protein (GO:0034620);; Biological Process: protein refolding (GO:0042026);; Mole…	K03283|0.0e+00|csv:101210925|K03283 heat shock 70kDa protein 1/2/6/8 | (RefSeq) heat shock cognate 70 kDa protein 2-like	Spliceosome (ko03040);; Protein processing in endoplasmic reticulum (ko04141);; Endocytosis (ko04144)	[O]	Posttranslational modification, protein turnover, chaperones	Hsp70 protein	Heat shock 70 kDa protein 4 OS=Arabidopsis thaliana OX=3702 GN=HSP70-4 PE=1 SV=1	O	Posttranslational modification, protein turnover, chaperones	hypothetical protein Csa_008855 [Cucumis sativus]
CsaV3_5G026450	down	chr5	21599675	21599738	-	0.030167	-0.151963	18	0.3785	0.53046	--	--	--	--	CsaV3_5G026450|+	--	down
CsaV3_5G026940	up	chr5	21977175	21977250	-	0.00068874	0.118214	14	0.23088	0.11267	--	--	--	--	CsaV3_5G026940|+	--	up	[QV]	Secondary metabolites biosynthesis, transport and catabolism;; Defense mechanisms	Molecular Function: monooxygenase activity (GO:0004497);; Molecular Function: iron ion binding (GO:0005506);; Biological Process: multicellular organism development (GO:0007275);; Biological Process: skotomorphogenesis (GO:0009647);; Biological Process: brassinosteroid homeostasis (GO:0010268);; Cellular Component: integral component of membrane (GO:0016021);; Biological Process: sterol metabolic…	K12639|3.0e-276|csv:101215045|K12639 cytochrome P450 family 724 subfamily B polypeptide 1 [EC:1.14.13.-] | (RefSeq) cytochrome P450 724B1	Brassinosteroid biosynthesis (ko00905)	[QI]	Secondary metabolites biosynthesis, transport and catabolism;; Lipid transport and metabolism	Cytochrome P450	Cytochrome P450 724B1 OS=Oryza sativa subsp. japonica OX=39947 GN=CYP724B1 PE=1 SV=1	Q	Secondary metabolites biosynthesis, transport and catabolism	cytochrome P450 724B1 [Cucumis sativus]
CsaV3_5G026940	up	chr5	21978315	21978390	-	0.0031385	0.13081	14	0.35081	0.22	--	--	--	--	CsaV3_5G026940|+	--	up
CsaV3_5G027240	up	chr5	22224621	22224799	-	0.0047486	0.175762	14	0.63921	0.46345	--	CsaV3_5G027240|	--	--	CsaV3_5G027250|+	CsaV3_5G027250|	up	[L]	Replication, recombination and repair	Molecular Function: nucleic acid binding (GO:0003676);; Molecular Function: helicase activity (GO:0004386);; Molecular Function: ATP binding (GO:0005524);;	K15271|0.0e+00|csv:101217203|K15271 ATP-dependent DNA helicase HFM1/MER3 [EC:3.6.4.12] | (RefSeq) DExH-box ATP-dependent RNA helicase DExH17 isoform X2	--	[A]	RNA processing and modification	Sec63 Brl domain	DExH-box ATP-dependent RNA helicase DExH17 OS=Arabidopsis thaliana OX=3702 GN=MER3 PE=2 SV=1	A	RNA processing and modification	hypothetical protein Csa_009053 [Cucumis sativus]
CsaV3_5G027330	down	chr5	22295405	22295476	-	0.035322	-0.170143	7	0.11871	0.28886	--	--	--	--	CsaV3_5G027330|-	CsaV3_5G027320|	up	--	--	Molecular Function: 3-beta-hydroxy-delta5-steroid dehydrogenase activity (GO:0003854);; Biological Process: steroid biosynthetic process (GO:0006694);; Molecular Function: oxidoreductase activity (GO:0016491);; Molecular Function: oxidoreductase activity, acting on the CH-OH group of donors, NAD or NADP as acceptor (GO:0016616);;	K09753|2.0e-38|ppp:112288176|K09753 cinnamoyl-CoA reductase [EC:1.2.1.44] | (RefSeq) cinnamoyl-CoA reductase 1-like isoform X1	Phenylpropanoid biosynthesis (ko00940)	[V]	Defense mechanisms	3-beta hydroxysteroid dehydrogenase/isomerase family	Cinnamoyl-CoA reductase-like SNL6 OS=Oryza sativa subsp. japonica OX=39947 GN=SNL6 PE=3 SV=1	V	Defense mechanisms	hypothetical protein Csa_008870 [Cucumis sativus]
CsaV3_5G028310	up	chr5	23470704	23470780	-	0.00047092	0.122647	17	0.67841	0.55576	--	--	--	--	CsaV3_5G028310|-	--	up	--	--	Cellular Component: nucleosome (GO:0000786);; Molecular Function: double-stranded DNA binding (GO:0003690);; Cellular Component: nucleus (GO:0005634);; Cellular Component: nucleolus (GO:0005730);; Biological Process: nucleosome assembly (GO:0006334);; Biological Process: regulation of transcription, DNA-templated (GO:0006355);; Biological Process: nucleosome positioning (GO:0016584);; Biological …	K11275|1.4e-08|pxb:103931085|K11275 histone H1/5 | (RefSeq) histone H1.2-like	--	--	--	linker histone H1 and H5 family	HMG-Y-related protein A OS=Glycine max OX=3847 PE=2 SV=1	K	Transcription	HMG-Y-related protein A [Cucumis sativus]
CsaV3_5G028310	down	chr5	23471893	23471944	-	0.011321	-0.119083	8	0.16475	0.28383	--	--	--	--	CsaV3_5G028310|-	--	up
CsaV3_5G028660	up	chr5	23787449	23787604	-	0.0044072	0.130515	11	0.19497	0.064455	--	--	--	--	CsaV3_5G028660|+	--	up	--	--	Cellular Component: nuclear chromatin (GO:0000790);; Biological Process: DNA replication-dependent nucleosome assembly (GO:0006335);; Biological Process: DNA replication-independent nucleosome assembly (GO:0006336);; Molecular Function: histone binding (GO:0042393);;	K10753|3.0e-111|csv:101205383|K10753 histone chaperone ASF1 | (RefSeq) probable histone chaperone ASF1A	--	[KB]	Transcription;; Chromatin structure and dynamics	ASF1 like histone chaperone	Histone chaperone ASF1B OS=Arabidopsis thaliana OX=3702 GN=ASF1B PE=1 SV=1	--	--	probable histone chaperone ASF1A [Cucumis sativus]
CsaV3_5G028850	up	chr5	23958945	23959004	-	0.0030033	0.215545	11	0.42312	0.20758	--	--	--	--	CsaV3_5G028850|-	CsaV3_5G028840|	up	--	--	Cellular Component: integral component of membrane (GO:0016021);;	K09775|3.5e-09|dzi:111283728|K09775 uncharacterized protein | (RefSeq) uncharacterized protein LOC111283728 isoform X1	--	--	--	Core-2/I-Branching enzyme	Glycosyltransferase BC10 OS=Oryza sativa subsp. japonica OX=39947 GN=BC10 PE=1 SV=1	S	Function unknown	glycosyltransferase BC10 [Cucumis sativus]
CsaV3_5G028850	down	chr5	23959325	23959407	-	0.0066758	-0.118222	12	0.49228	0.6105	--	--	--	--	CsaV3_5G028850|-	CsaV3_5G028840|	up
CsaV3_5G029720	up	chr5	24588716	24588787	-	0.020845	0.110104	16	0.73777	0.62767	--	--	--	--	CsaV3_5G029720|-	CsaV3_5G029710|	down	[V]	Defense mechanisms	Molecular Function: ATP binding (GO:0005524);; Cellular Component: integral component of membrane (GO:0016021);; Molecular Function: ATPase activity (GO:0016887);; Molecular Function: ATPase activity, coupled to transmembrane movement of substances (GO:0042626);; Biological Process: transmembrane transport (GO:0055085);;	K05658|0.0e+00|csv:101202823|K05658 ATP-binding cassette, subfamily B (MDR/TAP), member 1 [EC:7.6.2.2] | (RefSeq) ABC transporter B family member 4 isoform X1	ABC transporters (ko02010)	[Q]	Secondary metabolites biosynthesis, transport and catabolism	ABC transporter transmembrane region	ABC transporter B family member 4 OS=Arabidopsis thaliana OX=3702 GN=ABCB4 PE=1 SV=1	Q	Secondary metabolites biosynthesis, transport and catabolism	ABC transporter B family member 4 isoform X1 [Cucumis sativus]
CsaV3_5G030130	up	chr5	24802190	24802265	-	0.039874	0.13675	8	0.65675	0.52	--	--	--	--	CsaV3_5G030130|+	CsaV3_5G030130|	down	[E]	Amino acid transport and metabolism	Molecular Function: cysteine synthase activity (GO:0004124);; Cellular Component: cytoplasm (GO:0005737);; Biological Process: cysteine biosynthetic process from serine (GO:0006535);; Biological Process: double fertilization forming a zygote and endosperm (GO:0009567);; Biological Process: pollen tube growth (GO:0009860);; Molecular Function: pyridoxal phosphate binding (GO:0030170);;	K01738|1.5e-212|csv:101216623|K01738 cysteine synthase [EC:2.5.1.47] | (RefSeq) cysteine synthase	Cysteine and methionine metabolism (ko00270);; Sulfur metabolism (ko00920);; Carbon metabolism (ko01200);; Biosynthesis of amino acids (ko01230)	[E]	Amino acid transport and metabolism	Pyridoxal-phosphate dependent enzyme	Cysteine synthase, chloroplastic/chromoplastic OS=Spinacia oleracea OX=3562 GN=CYSK PE=1 SV=2	E	Amino acid transport and metabolism	cysteine synthase [Cucumis sativus]
CsaV3_5G030660	down	chr5	25143686	25143809	-	3.51e-06	-0.204738	14	0.29245	0.49719	--	CsaV3_5G030660|	--	--	CsaV3_5G030670|+	CsaV3_5G030670|	up	--	--	Biological Process: innate immune response-activating signal transduction (GO:0002758);; Cellular Component: plasma membrane (GO:0005886);;	K13456|4.2e-08|nnu:104609426|K13456 RPM1-interacting protein 4 | (RefSeq) RPM1-interacting protein 4-like	Plant-pathogen interaction (ko04626)	--	--	Cleavage site for pathogenic type III effector avirulence factor Avr	Protein NOI4 OS=Arabidopsis thaliana OX=3702 GN=NOI4 PE=1 SV=1	--	--	protein NOI4 [Cucumis sativus]
CsaV3_5G030840	down	chr5	25263755	25263829	-	6.32e-05	-0.2121	10	0.13753	0.34963	--	CsaV3_5G030820|	--	--	CsaV3_5G030840|-	CsaV3_5G030830|	down	[QV]	Secondary metabolites biosynthesis, transport and catabolism;; Defense mechanisms	Molecular Function: monooxygenase activity (GO:0004497);; Molecular Function: iron ion binding (GO:0005506);; Molecular Function: oxidoreductase activity, acting on paired donors, with incorporation or reduction of molecular oxygen (GO:0016705);; Molecular Function: heme binding (GO:0020037);;	K20617|1.5e-204|cmo:107990776|K20617 cytochrome P450 family 71 subfamily A | (RefSeq) cytochrome P450 71B34-like	--	[Q]	Secondary metabolites biosynthesis, transport and catabolism	Cytochrome P450	Cytochrome P450 71B10 OS=Arabidopsis thaliana OX=3702 GN=CYP71B10 PE=3 SV=1	Q	Secondary metabolites biosynthesis, transport and catabolism	hypothetical protein Csa_008036 [Cucumis sativus]
CsaV3_5G031110	down	chr5	25464350	25464437	-	6.76e-12	-0.277333	21	0.50743	0.78476	--	--	--	--	CsaV3_5G031110|+	--	up	[P]	Inorganic ion transport and metabolism	Molecular Function: inorganic phosphate transmembrane transporter activity (GO:0005315);; Cellular Component: integral component of plasma membrane (GO:0005887);; Biological Process: phosphate ion transmembrane transport (GO:0035435);;	K14640|0.0e+00|csv:101221596|K14640 solute carrier family 20 (sodium-dependent phosphate transporter) | (RefSeq) PT2-1; inorganic phosphate transporter 2-1, chloroplastic-like	--	[P]	Inorganic ion transport and metabolism	Phosphate transporter family	Inorganic phosphate transporter 2-1, chloroplastic OS=Arabidopsis thaliana OX=3702 GN=PHT2-1 PE=1 SV=1	P	Inorganic ion transport and metabolism	inorganic phosphate transporter 2-1, chloroplastic-like [Cucumis sativus]
CsaV3_5G034960	up	chr5	27699266	27699488	-	0.0047641	0.109538	13	0.28779	0.17826	--	--	--	CsaV3_5G034960|	--	--	down	--	--	Biological Process: metal ion transport (GO:0030001);; Molecular Function: metal ion binding (GO:0046872);;	K10752|3.8e-36|zju:107427343|K10752 histone-binding protein RBBP4 | (RefSeq) LOW QUALITY PROTEIN: WD-40 repeat-containing protein MSI3	--	[P]	Inorganic ion transport and metabolism	Heavy-metal-associated domain	Heavy metal-associated isoprenylated plant protein 20 OS=Arabidopsis thaliana OX=3702 GN=HIPP20 PE=1 SV=1	P	Inorganic ion transport and metabolism	heavy metal-associated isoprenylated plant protein 20 isoform X1 [Cucumis sativus]
CsaV3_5G034960	down	chr5	27702651	27702747	-	6.07e-08	-0.165233	20	0.60145	0.76668	--	--	--	CsaV3_5G034960|	--	--	down
CsaV3_5G034960	up	chr5	27702991	27703063	-	0.00068059	0.188606	11	0.25536	0.066758	--	--	--	CsaV3_5G034960|	--	--	down
CsaV3_5G034960	up	chr5	27705447	27705563	-	5.25e-10	0.206623	23	0.83562	0.629	--	CsaV3_5G034960|	--	--	CsaV3_5G034970|+	CsaV3_5G034980|,CsaV3_5G034970|	down
CsaV3_5G035800	down	chr5	28334841	28335018	-	0.034499	-0.100042	16	0.36685	0.4669	--	--	--	--	CsaV3_5G035800|+	--	up	--	--	Molecular Function: oxygen transporter activity (GO:0005344);; Biological Process: fatty acid metabolic process (GO:0006631);; Biological Process: triglyceride biosynthetic process (GO:0019432);; Molecular Function: oxygen binding (GO:0019825);; Molecular Function: heme binding (GO:0020037);; Molecular Function: metal ion binding (GO:0046872);;	--	--	[C]	Energy production and conversion	Globin	Non-symbiotic hemoglobin 2 OS=Brassica napus OX=3708 GN=HB2 PE=3 SV=1	C	Energy production and conversion	hypothetical protein Csa_008865 [Cucumis sativus]
CsaV3_5G036250	up	chr5	28600312	28600414	-	0.0024924	0.2028	15	0.53251	0.32971	--	--	--	--	CsaV3_5G036250|+	--	up	--	--	Cellular Component: nucleus (GO:0005634);; Molecular Function: zinc ion binding (GO:0008270);; Biological Process: cell differentiation (GO:0030154);; Molecular Function: sequence-specific DNA binding (GO:0043565);; Biological Process: positive regulation of transcription, DNA-templated (GO:0045893);;	K09184|2.2e-29|vvi:104879571|K09184 GATA-binding protein, other eukaryote | (RefSeq) GATA transcription factor 8	--	[K]	Transcription	GATA zinc finger	GATA transcription factor 8 OS=Arabidopsis thaliana OX=3702 GN=GATA8 PE=1 SV=1	K	Transcription	GATA transcription factor 8 [Cucumis sativus]
CsaV3_5G038140	down	chr5	30257307	30257460	-	0.027466	-0.201542	8	0.10533	0.30688	--	CsaV3_5G038130|	--	--	CsaV3_5G038140|-	--	up	--	--	Cellular Component: extracellular region (GO:0005576);; Cellular Component: cell wall (GO:0005618);; Biological Process: plant-type cell wall organization (GO:0009664);; Biological Process: unidimensional cell growth (GO:0009826);; Cellular Component: membrane (GO:0016020);; Biological Process: primary root development (GO:0080022);;	K20628|5.8e-143|csv:101220358|K20628 expansin | (RefSeq) expansin-A5	--	--	--	Expansin C-terminal domain	Expansin-A5 OS=Arabidopsis thaliana OX=3702 GN=EXPA5 PE=2 SV=1	S	Function unknown	expansin-A5 [Cucumis sativus]
CsaV3_5G038140	down	chr5	30258074	30258216	-	0.0015517	-0.159928	23	0.44987	0.6098	--	CsaV3_5G038140|	--	--	CsaV3_5G038140|-	--	up
CsaV3_5G039570	up	chr5	31248244	31248303	-	0.027466	0.12897	11	0.61927	0.4903	--	--	--	--	CsaV3_5G039570|+	CsaV3_5G039560|	up	--	--	Molecular Function: single-stranded DNA binding (GO:0003697);; Molecular Function: DNA primase activity (GO:0003896);; Cellular Component: alpha DNA polymerase:primase complex (GO:0005658);; Biological Process: DNA replication, synthesis of RNA primer (GO:0006269);;	K02684|9.7e-269|csv:101203146|K02684 DNA primase small subunit [EC:2.7.7.102] | (RefSeq) DNA primase small subunit	DNA replication (ko03030)	[L]	Replication, recombination and repair	DNA primase small subunit	--	L	Replication, recombination and repair	DNA primase small subunit [Cucumis sativus]
CsaV3_6G000240	up	chr6	161354	161413	-	1.48e-05	0.192048	7	0.42095	0.2289	--	CsaV3_6G000240|	--	--	CsaV3_6G000240|-	--	down	[M]	Cell wall/membrane/envelope biogenesis	Molecular Function: protein serine/threonine kinase activity (GO:0004674);; Molecular Function: ATP binding (GO:0005524);; Cellular Component: nucleus (GO:0005634);; Cellular Component: cytoplasm (GO:0005737);; Biological Process: protein phosphorylation (GO:0006468);; Biological Process: intracellular signal transduction (GO:0035556);;	K07198|8.2e-241|csv:101206030|K07198 5'-AMP-activated protein kinase, catalytic alpha subunit [EC:2.7.11.11] | (RefSeq) CBL-interacting serine/threonine-protein kinase 1 isoform X1	--	[T]	Signal transduction mechanisms	Protein kinase domain	CBL-interacting serine/threonine-protein kinase 1 OS=Arabidopsis thaliana OX=3702 GN=CIPK1 PE=1 SV=2	T	Signal transduction mechanisms	CBL-interacting serine/threonine-protein kinase 1 isoform X2 [Cucumis sativus]
CsaV3_6G000290	up	chr6	207902	207994	-	0.0019519	0.11197	11	0.22297	0.111	--	CsaV3_6G000290|	--	--	CsaV3_6G000290|-	CsaV3_6G000280|	down	[QV]	Secondary metabolites biosynthesis, transport and catabolism;; Defense mechanisms	Molecular Function: monooxygenase activity (GO:0004497);; Molecular Function: iron ion binding (GO:0005506);; Biological Process: multicellular organism development (GO:0007275);; Biological Process: brassinosteroid homeostasis (GO:0010268);; Cellular Component: integral component of membrane (GO:0016021);; Biological Process: sterol metabolic process (GO:0016125);; Biological Process: brassinost…	K09588|6.6e-85|gab:108484595|K09588 cytochrome P450 family 90 subfamily A polypeptide 1 [EC:1.14.-.-] | (RefSeq) cytochrome P450 90A1-like	Brassinosteroid biosynthesis (ko00905)	[QI]	Secondary metabolites biosynthesis, transport and catabolism;; Lipid transport and metabolism	Cytochrome P450	Abietadienol/abietadienal oxidase OS=Pinus taeda OX=3352 GN=CYP720B1 PE=1 SV=1	Q	Secondary metabolites biosynthesis, transport and catabolism	abietadienol/abietadienal oxidase [Cucumis sativus]
CsaV3_6G000290	up	chr6	216816	216911	-	0.0048061	0.120148	18	0.70439	0.58424	--	--	--	--	CsaV3_6G000300|+	CsaV3_6G000300|,CsaV3_6G000290|	down
CsaV3_6G001650	up	chr6	1092343	1092420	-	0.00013088	0.146667	16	0.29133	0.14467	--	--	--	--	CsaV3_6G001650|+	--	up	--	--	Molecular Function: transferase activity, transferring acyl groups other than amino-acyl groups (GO:0016747);;	K19747|1.3e-61|cann:107863241|K19747 BAHD acyltransferase [EC:2.3.1.-] | (RefSeq) BAHD acyltransferase DCR	--	--	--	Transferase family	Uncharacterized acetyltransferase At3g50280 OS=Arabidopsis thaliana OX=3702 GN=At3g50280 PE=3 SV=1	S	Function unknown	uncharacterized acetyltransferase At3g50280 [Cucumis sativus]
CsaV3_6G003690	up	chr6	3044836	3044938	-	7.91e-06	0.227688	16	0.85052	0.62283	--	--	--	CsaV3_6G003680|	--	CsaV3_6G003690|	up	--	--	Cellular Component: nucleosome (GO:0000786);; Molecular Function: DNA binding (GO:0003677);; Cellular Component: nucleus (GO:0005634);; Molecular Function: protein heterodimerization activity (GO:0046982);;	K11253|1.4e-66|adu:107461485|K11253 histone H3 | (RefSeq) histone H3.2	--	[B]	Chromatin structure and dynamics	Core histone H2A/H2B/H3/H4	Histone H3.2 OS=Medicago sativa OX=3879 GN=H3-1.1 PE=1 SV=2	B	Chromatin structure and dynamics	uncharacterized protein LOC111021800 [Momordica charantia]
CsaV3_6G007580	down	chr6	6120916	6121119	-	9.48e-05	-0.130423	26	0.67001	0.80044	--	CsaV3_6G007580|	--	--	CsaV3_6G007580|-	--	up	[I]	Lipid transport and metabolism	Molecular Function: lanosterol synthase activity (GO:0000250);; Cellular Component: lipid droplet (GO:0005811);; Biological Process: triterpenoid biosynthetic process (GO:0016104);; Molecular Function: beta-amyrin synthase activity (GO:0042300);;	K15812|0.0e+00|csv:101204533|K15812 cucurbitadienol synthase [EC:5.4.99.33] | (RefSeq) cucurbitadienol synthase	Sesquiterpenoid and triterpenoid biosynthesis (ko00909)	[I]	Lipid transport and metabolism	Squalene-hopene cyclase C-terminal domain	Cucurbitadienol synthase OS=Cucurbita pepo OX=3663 GN=CPQ PE=1 SV=1	I	Lipid transport and metabolism	hypothetical protein Csa_005166 [Cucumis sativus]
CsaV3_6G008680	up	chr6	6968885	6968959	-	0.011069	0.2706	5	0.70767	0.43707	--	CsaV3_6G008680|	--	--	CsaV3_6G008680|-	--	up	[T]	Signal transduction mechanisms	Biological Process: double-strand break repair via break-induced replication (GO:0000727);; Molecular Function: protein serine/threonine kinase activity (GO:0004674);; Molecular Function: ATP binding (GO:0005524);; Cellular Component: nucleus (GO:0005634);; Cellular Component: cytoplasm (GO:0005737);; Biological Process: peptidyl-serine phosphorylation (GO:0018105);;	K02214|0.0e+00|csv:101210717|K02214 cell division control protein 7 [EC:2.7.11.1] | (RefSeq) uncharacterized protein LOC101210717 isoform X2	--	[L]	Replication, recombination and repair	Protein kinase domain	Cell division control protein 2 homolog A OS=Antirrhinum majus OX=4151 GN=CDC2A PE=2 SV=2	T	Signal transduction mechanisms	hypothetical protein Csa_004875 [Cucumis sativus]
CsaV3_6G008980	down	chr6	7227700	7227798	-	2.75e-05	-0.1749	20	0.53442	0.70932	--	--	--	--	CsaV3_6G008980|+	--	down	--	--	Molecular Function: protein serine/threonine phosphatase activity (GO:0004722);; Molecular Function: magnesium-dependent protein serine/threonine phosphatase activity (GO:0004724);; Molecular Function: metal ion binding (GO:0046872);;	K01102|2.9e-224|cmo:103485165|K01102 pyruvate dehydrogenase phosphatase [EC:3.1.3.43] | (RefSeq) probable protein phosphatase 2C 60	--	[T]	Signal transduction mechanisms	Protein phosphatase 2C	Probable protein phosphatase 2C 60 OS=Oryza sativa subsp. japonica OX=39947 GN=Os06g0717800 PE=2 SV=1	T	Signal transduction mechanisms	probable protein phosphatase 2C 60 [Cucumis sativus]
CsaV3_6G010060	down	chr6	8153638	8153688	-	4.51e-05	-0.139175	19	0.63967	0.77884	--	--	--	--	CsaV3_6G010060|+	--	up	--	--	--	--	--	--	--	--	--	--	--	hypothetical protein Csa_005750 [Cucumis sativus]
CsaV3_6G010120	down	chr6	8215975	8216165	-	6.06e-06	-0.198961	17	0.67629	0.87525	--	CsaV3_6G010110|	--	--	CsaV3_6G010120|-	--	up	--	--	--	--	--	--	--	Phosphate-induced protein 1 conserved region	Protein EXORDIUM-like 5 OS=Arabidopsis thaliana OX=3702 GN=EXL5 PE=2 SV=1	S	Function unknown	protein EXORDIUM-like 5 [Cucumis sativus]
CsaV3_6G010120	down	chr6	8216166	8216329	-	1.61e-09	-0.282797	23	0.42254	0.70533	--	CsaV3_6G010110|	--	--	CsaV3_6G010120|-	--	up
CsaV3_6G010120	down	chr6	8224711	8225094	-	6.65e-09	-0.180621	44	0.58976	0.77038	--	--	--	--	CsaV3_6G010120|-	--	up
CsaV3_6G012860	down	chr6	8980363	8980581	-	0.035175	0.122714	7	0.22781	0.1051	--	--	--	--	CsaV3_6G012860|-	--	down	--	--	--	--	--	--	--	PDDEXK-like family of unknown function	--	S	Function unknown	uncharacterized protein LOC101208067 [Cucumis sativus]
CsaV3_6G012860	down	chr6	8983328	8983384	-	0.005335	-0.277889	9	0.54059	0.81848	--	--	--	--	CsaV3_6G012860|-	--	down
CsaV3_6G013920	down	chr6	10080789	10080908	-	0.00067757	-0.14855	20	0.12687	0.27542	--	--	--	--	CsaV3_6G013920|+	CsaV3_6G013910|	down	--	--	--	K20855|2.8e-08|pavi:110763119|K20855 beta-1,3-galactosyltransferase 1/2/3/4/5/7/8 [EC:2.4.1.-] | (RefSeq) probable beta-1,3-galactosyltransferase 2	--	--	--	Senescence regulator	--	S	Function unknown	uncharacterized protein LOC101215539 [Cucumis sativus]
CsaV3_6G013920	up	chr6	10089438	10089597	-	0.00017119	0.231542	16	0.41879	0.18725	--	--	--	--	CsaV3_6G013920|+	--	down
CsaV3_6G013920	up	chr6	10096196	10096426	-	0.0075858	0.292784	17	0.60586	0.31308	--	CsaV3_6G013920|	--	--	CsaV3_6G013930|+	--	down
CsaV3_6G016090	down	chr6	12049437	12049508	-	5.51e-08	-0.208521	16	0.71604	0.92456	--	--	--	--	CsaV3_6G016090|+	--	down	[E]	Amino acid transport and metabolism	Molecular Function: asparagine synthase (glutamine-hydrolyzing) activity (GO:0004066);; Molecular Function: ATP binding (GO:0005524);; Cellular Component: cytosol (GO:0005829);; Biological Process: asparagine biosynthetic process (GO:0006529);; Biological Process: glutamine metabolic process (GO:0006541);;	K01953|0.0e+00|csv:101214250|K01953 asparagine synthase (glutamine-hydrolysing) [EC:6.3.5.4] | (RefSeq) asparagine synthetase [glutamine-hydrolyzing]	Alanine, aspartate and glutamate metabolism (ko00250);; Biosynthesis of amino acids (ko01230)	[E]	Amino acid transport and metabolism	Asparagine synthase	Asparagine synthetase [glutamine-hydrolyzing] 1 OS=Lotus japonicus OX=34305 GN=AS1 PE=2 SV=2	E	Amino acid transport and metabolism	asparagine synthetase [glutamine-hydrolyzing] [Cucumis sativus]
CsaV3_6G016090	up	chr6	12053817	12053953	-	0.014002	0.164733	10	0.27067	0.10593	--	--	--	--	CsaV3_6G016090|+	--	down
CsaV3_6G023830	up	chr6	15824604	15824884	-	0.027466	0.283375	8	0.68479	0.40142	--	CsaV3_6G023830|	--	--	CsaV3_6G023830|-	--	down	--	--	--	--	--	--	--	--	--	--	--	hypothetical protein Csa_021740 [Cucumis sativus]
CsaV3_6G028570	up	chr6	16840566	16840652	-	1.3e-11	0.116654	26	0.96044	0.84378	--	--	--	--	CsaV3_6G028570|-	--	down	--	--	Molecular Function: ubiquitin conjugating enzyme activity (GO:0061631);;	K10581|8.9e-184|csv:101221014|K10581 ubiquitin-conjugating enzyme E2 O [EC:2.3.2.24] | (RefSeq) probable ubiquitin-conjugating enzyme E2 25	Ubiquitin mediated proteolysis (ko04120)	[O]	Posttranslational modification, protein turnover, chaperones	Ubiquitin-conjugating enzyme	Probable ubiquitin-conjugating enzyme E2 25 OS=Arabidopsis thaliana OX=3702 GN=UBC25 PE=2 SV=1	O	Posttranslational modification, protein turnover, chaperones	probable ubiquitin-conjugating enzyme E2 25 [Cucumis sativus]
CsaV3_6G028570	down	chr6	16841190	16841332	-	0.015794	-0.176368	19	0.52193	0.6983	--	--	--	--	CsaV3_6G028570|-	--	down
CsaV3_6G032380	up	chr6	18349854	18349916	-	0.0064966	0.140848	11	0.65715	0.5163	--	--	--	CsaV3_6G032380|	--	CsaV3_6G032390|	up	--	--	Molecular Function: UDP-glycosyltransferase activity (GO:0008194);;	K13691|9.2e-138|cmo:103488486|K13691 pathogen-inducible salicylic acid glucosyltransferase [EC:2.4.1.-] | (RefSeq) UDP-glycosyltransferase 74E2-like	--	[GC]	Carbohydrate transport and metabolism;; Energy production and conversion	--	UDP-glycosyltransferase 74G1 OS=Stevia rebaudiana OX=55670 GN=UGT74G1 PE=1 SV=1	--	--	hypothetical protein Csa_018941 [Cucumis sativus]
CsaV3_6G036510	down	chr6	20301873	20302021	-	0.00054993	-0.126028	12	0.017167	0.14319	--	--	--	--	CsaV3_6G036520|-	CsaV3_6G036510|	up	--	--	Cellular Component: nucleus (GO:0005634);; Molecular Function: zinc ion binding (GO:0008270);; Biological Process: cell differentiation (GO:0030154);; Molecular Function: sequence-specific DNA binding (GO:0043565);; Biological Process: positive regulation of transcription, DNA-templated (GO:0045893);;	K09184|2.6e-29|vvi:104879571|K09184 GATA-binding protein, other eukaryote | (RefSeq) GATA transcription factor 8	--	[K]	Transcription	GATA zinc finger	GATA transcription factor 8 OS=Arabidopsis thaliana OX=3702 GN=GATA8 PE=1 SV=1	K	Transcription	GATA transcription factor 8 [Cucumis sativus]
CsaV3_6G036610	up	chr6	20389698	20389759	-	0.028643	0.167467	10	0.73737	0.5699	--	CsaV3_6G036610|	--	--	CsaV3_6G036610|-	--	down	--	--	Biological Process: amino acid transmembrane transport (GO:0003333);; Cellular Component: vacuolar membrane (GO:0005774);; Cellular Component: plasma membrane (GO:0005886);; Molecular Function: amino acid transmembrane transporter activity (GO:0015171);; Cellular Component: integral component of membrane (GO:0016021);;	K15015|8.5e-307|csv:101202871|K15015 solute carrier family 32 (vesicular inhibitory amino acid transporter) | (RefSeq) amino acid transporter AVT1C	--	[E]	Amino acid transport and metabolism	Transmembrane amino acid transporter protein	Amino acid transporter AVT1C OS=Arabidopsis thaliana OX=3702 GN=AVT1C PE=1 SV=1	E	Amino acid transport and metabolism	amino acid transporter AVT1C [Cucumis sativus]
CsaV3_6G037680	down	chr6	21318290	21318392	-	0.043017	-0.133692	13	0.57277	0.70646	--	CsaV3_6G037680|,CsaV3_6G037670|	--	--	CsaV3_6G037680|-	--	up	[Q]	Secondary metabolites biosynthesis, transport and catabolism	Molecular Function: cellulase activity (GO:0008810);; Biological Process: cellulose catabolic process (GO:0030245);;	K01179|2.6e-183|cmo:103482819|K01179 endoglucanase [EC:3.2.1.4] | (RefSeq) endoglucanase 6-like	Starch and sucrose metabolism (ko00500)	--	--	Glycosyl hydrolase family 9	Endoglucanase 11 OS=Arabidopsis thaliana OX=3702 GN=At2g32990 PE=2 SV=1	G	Carbohydrate transport and metabolism	endoglucanase 11 [Cucumis sativus]
CsaV3_6G037720	down	chr6	21343269	21343349	-	1.56e-08	-0.152667	19	0.70763	0.8603	--	--	--	--	CsaV3_6G037720|+	--	up	--	--	Molecular Function: hydrolase activity, hydrolyzing O-glycosyl compounds (GO:0004553);; Biological Process: carbohydrate metabolic process (GO:0005975);; Cellular Component: anchored component of plasma membrane (GO:0046658);;	K19891|1.8e-95|smo:SELMODRAFT_442025|K19891 glucan endo-1,3-beta-glucosidase 1/2/3 [EC:3.2.1.39] | (RefSeq) hypothetical protein	Starch and sucrose metabolism (ko00500)	--	--	Glycosyl hydrolases family 17	Glucan endo-1,3-beta-glucosidase 13 OS=Arabidopsis thaliana OX=3702 GN=At5g56590 PE=2 SV=1	G	Carbohydrate transport and metabolism	glucan endo-1,3-beta-glucosidase 12 [Cucumis sativus]
CsaV3_6G037720	up	chr6	21346259	21346311	-	0.0033436	0.214481	9	0.56193	0.34744	--	--	--	--	CsaV3_6G037720|+	CsaV3_6G037720|	up
CsaV3_6G038030	down	chr6	21579325	21579402	-	0.047042	-0.103444	6	0.086889	0.19033	--	--	--	--	CsaV3_6G038030|+	CsaV3_6G038030|	up	[G]	Carbohydrate transport and metabolism	Molecular Function: hydrolase activity, hydrolyzing O-glycosyl compounds (GO:0004553);; Cellular Component: cell wall (GO:0005618);; Biological Process: xyloglucan metabolic process (GO:0010411);; Molecular Function: xyloglucan:xyloglucosyl transferase activity (GO:0016762);; Biological Process: cell wall biogenesis (GO:0042546);; Cellular Component: apoplast (GO:0048046);; Biological Process: ce…	K08235|4.0e-167|csv:101220354|K08235 xyloglucan:xyloglucosyl transferase [EC:2.4.1.207] | (RefSeq) xyloglucan endotransglucosylase/hydrolase 2	--	--	--	Glycosyl hydrolases family 16	Xyloglucan endotransglucosylase/hydrolase 2 OS=Glycine max OX=3847 PE=2 SV=1	G	Carbohydrate transport and metabolism	xyloglucan endotransglucosylase/hydrolase 2 [Cucumis sativus]
CsaV3_6G038110	up	chr6	21642385	21642594	-	0.0051698	0.166183	20	0.78327	0.61708	--	CsaV3_6G038110|	--	--	CsaV3_6G038120|-	--	down	--	--	Cellular Component: integral component of membrane (GO:0016021);; Molecular Function: transferase activity, transferring acyl groups (GO:0016746);;	K13508|0.0e+00|csv:101214551|K13508 glycerol-3-phosphate acyltransferase [EC:2.3.1.15 2.3.1.198] | (RefSeq) glycerol-3-phosphate acyltransferase 1	Glycerolipid metabolism (ko00561);; Glycerophospholipid metabolism (ko00564)	--	--	Acyltransferase	Glycerol-3-phosphate acyltransferase 1 OS=Arabidopsis thaliana OX=3702 GN=GPAT1 PE=1 SV=1	I	Lipid transport and metabolism	glycerol-3-phosphate acyltransferase 1 [Cucumis sativus]
CsaV3_6G038110	down	chr6	21643439	21643504	-	0.0030116	-0.100606	11	0.8133	0.91391	--	CsaV3_6G038110|	--	--	CsaV3_6G038120|-	--	down
CsaV3_6G038210	up	chr6	21741695	21741749	-	0.024166	0.243762	7	0.82695	0.58319	--	--	--	--	CsaV3_6G038210|+	CsaV3_6G038210|	down	[G]	Carbohydrate transport and metabolism	Biological Process: carbohydrate transport (GO:0008643);; Cellular Component: integral component of membrane (GO:0016021);; Molecular Function: transmembrane transporter activity (GO:0022857);;	K24193|3.2e-303|csv:101215746|K24193 MFS transporter, SP family, sugar:H+ symporter | (RefSeq) sugar transport protein 13	--	[R]	General function prediction only	Sugar (and other) transporter	Sugar transport protein 13 OS=Arabidopsis thaliana OX=3702 GN=STP13 PE=1 SV=2	U	Intracellular trafficking, secretion, and vesicular transport	sugar transport protein 13 [Cucumis sativus]
CsaV3_6G039330	up	chr6	22596777	22596848	-	0.0088257	0.183571	7	0.73662	0.55305	--	--	--	--	CsaV3_6G039330|-	--	up	[M]	Cell wall/membrane/envelope biogenesis	Molecular Function: calcium ion binding (GO:0005509);; Molecular Function: calmodulin binding (GO:0005516);; Molecular Function: ATP binding (GO:0005524);; Cellular Component: nucleus (GO:0005634);; Cellular Component: cytoplasm (GO:0005737);; Cellular Component: plasma membrane (GO:0005886);; Molecular Function: calcium-dependent protein serine/threonine kinase activity (GO:0009931);; Biological…	K13412|5.2e-306|csv:101212721|K13412 calcium-dependent protein kinase [EC:2.7.11.1] | (RefSeq) calcium-dependent protein kinase 8	Plant-pathogen interaction (ko04626)	[T]	Signal transduction mechanisms	Protein kinase domain	Calcium-dependent protein kinase 8 OS=Arabidopsis thaliana OX=3702 GN=CPK8 PE=1 SV=1	T	Signal transduction mechanisms	calcium-dependent protein kinase 8 [Cucumis sativus]
CsaV3_6G040370	down	chr6	23311926	23312003	-	0.017456	-0.213444	15	0.25693	0.47038	--	--	--	--	CsaV3_6G040370|+	CsaV3_6G040360|	up	[N]	Cell motility	Cellular Component: Golgi apparatus (GO:0005794);; Cellular Component: integral component of membrane (GO:0016021);; Molecular Function: transferase activity, transferring glycosyl groups (GO:0016757);; Molecular Function: mannan synthase activity (GO:0051753);;	K13680|7.1e-278|csv:101207836|K13680 beta-mannan synthase [EC:2.4.1.32] | (RefSeq) glucomannan 4-beta-mannosyltransferase 9 isoform X1	--	--	--	Glycosyl transferase family group 2	Glucomannan 4-beta-mannosyltransferase 9 OS=Arabidopsis thaliana OX=3702 GN=CSLA9 PE=1 SV=1	M	Cell wall/membrane/envelope biogenesis	hypothetical protein Csa_002883 [Cucumis sativus]
CsaV3_6G040370	down	chr6	23324240	23324342	-	2.26e-05	-0.146627	17	0.044529	0.19116	--	--	--	--	CsaV3_6G040370|+	--	up
CsaV3_6G041920	up	chr6	24465528	24465633	-	2.18e-08	0.288976	14	0.76086	0.47188	--	CsaV3_6G041910|	--	--	CsaV3_6G041920|+	CsaV3_6G041920|	down	--	--	Cellular Component: integral component of membrane (GO:0016021);; Molecular Function: transmembrane transporter activity (GO:0022857);;	--	--	--	--	EamA-like transporter family	WAT1-related protein At5g64700 OS=Arabidopsis thaliana OX=3702 GN=At5g64700 PE=2 SV=1	--	--	hypothetical protein Csa_004234 [Cucumis sativus]
CsaV3_6G041940	down	chr6	24490931	24491035	-	0.014145	-0.103897	13	0.43351	0.53741	--	CsaV3_6G041940|	--	--	CsaV3_6G041950|-	--	up	--	--	Cellular Component: membrane (GO:0016020);; Cellular Component: integral component of membrane (GO:0016021);;	--	--	--	--	--	--	--	--	hypothetical protein Csa_004096 [Cucumis sativus]
CsaV3_6G042080	down	chr6	24620508	24620595	-	0.039989	-0.192067	10	0.3303	0.52237	--	--	--	--	CsaV3_6G042080|+	CsaV3_6G042080|	up	[F]	Nucleotide transport and metabolism	Molecular Function: ribonucleoside-diphosphate reductase activity, thioredoxin disulfide as acceptor (GO:0004748);; Molecular Function: ATP binding (GO:0005524);; Cellular Component: ribonucleoside-diphosphate reductase complex (GO:0005971);; Biological Process: DNA replication (GO:0006260);; Biological Process: deoxyribonucleotide biosynthetic process (GO:0009263);;	K10807|0.0e+00|csv:101210105|K10807 ribonucleoside-diphosphate reductase subunit M1 [EC:1.17.4.1] | (RefSeq) ribonucleoside-diphosphate reductase large subunit	Purine metabolism (ko00230);; Pyrimidine metabolism (ko00240);; Glutathione metabolism (ko00480)	[F]	Nucleotide transport and metabolism	Ribonucleotide reductase, barrel domain	Ribonucleoside-diphosphate reductase large subunit OS=Arabidopsis thaliana OX=3702 GN=RNR1 PE=1 SV=1	F	Nucleotide transport and metabolism	ribonucleoside-diphosphate reductase large subunit [Cucumis sativus]
CsaV3_6G042660	up	chr6	25055121	25055354	-	0.00067721	0.108509	19	0.20716	0.098649	--	CsaV3_6G042650|	--	--	CsaV3_6G042660|-	--	up	--	--	--	--	--	--	--	Domain of unknown function (DUF4228)	--	S	Function unknown	uncharacterized protein LOC101203564 [Cucumis sativus]
CsaV3_6G043280	down	chr6	25479555	25479634	-	1.13e-07	-0.120563	32	0.851	0.97156	--	--	--	--	CsaV3_6G043280|+	--	up	--	--	--	--	--	--	--	Remorin, C-terminal region	--	S	Function unknown	uncharacterized protein LOC101216077 [Cucumis sativus]
CsaV3_6G047200	up	chr6	27859773	27859886	-	0.015026	0.120067	15	0.68809	0.56802	--	--	--	--	CsaV3_6G047200|+	CsaV3_6G047200|	up	--	--	Cellular Component: extracellular region (GO:0005576);; Biological Process: defense response (GO:0006952);;	K12173|6.4e-36|gmx:100794341|K12173 BRCA1-A complex subunit BRE | (RefSeq) BRISC and BRCA1-A complex member 2	Homologous recombination (ko03440)	--	--	Thaumatin family	Thaumatin-like protein 1 OS=Arabidopsis thaliana OX=3702 GN=TLP1 PE=2 SV=1	T	Signal transduction mechanisms	thaumatin-like protein 1 [Cucumis sativus]
CsaV3_6G047200	up	chr6	27862615	27862681	-	0.0013583	0.1775	10	0.33983	0.16233	--	CsaV3_6G047200|	--	--	CsaV3_6G047210|-	--	up
CsaV3_6G050380	up	chr6	29376869	29376969	-	0.00072511	0.163021	16	0.93358	0.77056	--	--	--	--	CsaV3_6G050390|+	CsaV3_6G050380|	up	--	--	--	--	--	--	--	--	Protein E6 OS=Gossypium hirsutum OX=3635 GN=E6 PE=2 SV=1	--	--	hypothetical protein Csa_002947 [Cucumis sativus]
CsaV3_6G052190	up	chr6	30367848	30367899	-	7.38e-05	0.329778	9	0.49544	0.16567	--	CsaV3_6G052180|	--	--	CsaV3_6G052190|+	CsaV3_6G052190|	up	--	--	Biological Process: double-strand break repair via homologous recombination (GO:0000724);; Molecular Function: DNA binding (GO:0003677);; Molecular Function: ubiquitin-protein transferase activity (GO:0004842);; Cellular Component: plasma membrane (GO:0005886);; Molecular Function: zinc ion binding (GO:0008270);; Cellular Component: BRCA1-BARD1 complex (GO:0031436);; Biological Process: positive …	K10683|0.0e+00|csv:101212120|K10683 BRCA1-associated RING domain protein 1 | (RefSeq) protein BREAST CANCER SUSCEPTIBILITY 1 homolog	Homologous recombination (ko03440)	[LK]	Replication, recombination and repair;; Transcription	PHD-like zinc-binding domain	Protein BREAST CANCER SUSCEPTIBILITY 1 homolog OS=Arabidopsis thaliana OX=3702 GN=BRCA1 PE=1 SV=1	L	Replication, recombination and repair	protein BREAST CANCER SUSCEPTIBILITY 1 homolog [Cucumis sativus]
CsaV3_6G052220	down	chr6	30385392	30385478	-	0.011379	-0.1346	5	0.18827	0.32287	--	CsaV3_6G052210|	--	--	CsaV3_6G052220|+	CsaV3_6G052220|	up	--	--	Molecular Function: molybdate ion transmembrane transporter activity (GO:0015098);; Cellular Component: membrane (GO:0016020);; Cellular Component: integral component of membrane (GO:0016021);;	K24175|3.5e-258|csv:101218590|K24175 MFS transporter, MFS domain-containing protein family, molybdate-anion transporter | (RefSeq) molybdate-anion transporter	--	[G]	Carbohydrate transport and metabolism	Sugar-tranasporters, 12 TM	--	G	Carbohydrate transport and metabolism	molybdate-anion transporter [Cucumis sativus]
CsaV3_6G052720	down	chr6	30723844	30723920	-	0.0030233	-0.134137	17	0.80929	0.94343	--	--	--	--	CsaV3_6G052720|+	--	up	[R]	General function prediction only	Biological Process: lipid catabolic process (GO:0016042);; Molecular Function: hydrolase activity (GO:0016787);;	K16815|1.5e-06|cme:CYME_CMT312C|K16815 calcium-independent phospholipase A2-gamma | (RefSeq) membrane-associated calcium-independent phospholipase A2	--	[I]	Lipid transport and metabolism	Patatin-like phospholipase	Patatin-like protein 7 OS=Arabidopsis thaliana OX=3702 GN=PLP7 PE=2 SV=1	I	Lipid transport and metabolism	patatin-like protein 3 [Cucumis sativus]
CsaV3_7G000010	up	chr7	81809	81920	-	0.0061354	0.108544	19	0.65309	0.54454	--	CsaV3_7G000010|,CsaV3_7G000020|	--	--	CsaV3_7G000020|-	--	down	--	--	Molecular Function: DNA binding (GO:0003677);; Cellular Component: nucleus (GO:0005634);;	K15397|1.1e-26|cpep:111776416|K15397 3-ketoacyl-CoA synthase [EC:2.3.1.199] | (RefSeq) 3-ketoacyl-CoA synthase 17-like	Fatty acid elongation (ko00062);; Plant-pathogen interaction (ko04626)	[O]	Posttranslational modification, protein turnover, chaperones	Myb-like DNA-binding domain	Protein RADIALIS-like 1 OS=Arabidopsis thaliana OX=3702 GN=RL1 PE=2 SV=1	K	Transcription	protein RADIALIS-like 1 [Cucumis sativus]
CsaV3_7G001870	down	chr7	1519614	1519743	-	0.0002757	-0.133667	13	0.098308	0.23197	--	--	--	--	CsaV3_7G001870|-	CsaV3_7G001860|	up	--	--	--	--	--	--	--	Phosphate-induced protein 1 conserved region	Protein EXORDIUM-like 5 OS=Arabidopsis thaliana OX=3702 GN=EXL5 PE=2 SV=1	S	Function unknown	protein EXORDIUM-like 5 [Cucumis sativus]
CsaV3_7G001870	up	chr7	1523488	1523570	-	0.0013543	0.15163	18	0.50593	0.3543	--	CsaV3_7G001870|	--	--	CsaV3_7G001870|-	--	up
CsaV3_7G002480	up	chr7	1959513	1959891	-	0.0011855	0.200919	33	0.63706	0.43614	--	--	--	--	CsaV3_7G002490|+	CsaV3_7G002480|	up	--	--	Cellular Component: anchored component of plasma membrane (GO:0046658);;	--	--	--	--	Fasciclin domain	Fasciclin-like arabinogalactan protein 2 OS=Arabidopsis thaliana OX=3702 GN=FLA2 PE=2 SV=1	S	Function unknown	fasciclin-like arabinogalactan protein 2 [Cucumis sativus]
CsaV3_7G002940	down	chr7	2224450	2224523	-	0.0014472	-0.267515	11	0.38276	0.65027	--	--	--	--	CsaV3_7G002940|-	--	up	--	--	--	--	--	--	--	--	--	--	--	glycine-rich protein [Cucumis sativus]
CsaV3_7G003150	down	chr7	2358001	2358057	-	1.81e-05	-0.199778	9	0.08637	0.28615	--	--	--	--	CsaV3_7G003160|+	CsaV3_7G003150|,CsaV3_7G003160|	up	[R]	General function prediction only	Cellular Component: plasma membrane (GO:0005886);; Biological Process: plant-type secondary cell wall biogenesis (GO:0009834);;	--	--	--	--	Fasciclin domain	Fasciclin-like arabinogalactan protein 9 OS=Arabidopsis thaliana OX=3702 GN=FLA9 PE=2 SV=1	S	Function unknown	fasciclin-like arabinogalactan protein 13 [Cucumis sativus]
CsaV3_7G006280	up	chr7	3857976	3858037	-	8.85e-05	0.121133	15	0.77282	0.65169	--	--	--	CsaV3_7G006280|	--	--	down	--	--	Molecular Function: UDP-glycosyltransferase activity (GO:0008194);; Cellular Component: intracellular membrane-bounded organelle (GO:0043231);; Molecular Function: quercetin 3-O-glucosyltransferase activity (GO:0080043);; Molecular Function: quercetin 7-O-glucosyltransferase activity (GO:0080044);;	K22706|2.5e-169|pmum:103319663|K22706 (R)-mandelonitrile beta-glucosyltransferase [EC:2.4.1.354] | (RefSeq) 7-deoxyloganetin glucosyltransferase-like	Cyanoamino acid metabolism (ko00460)	[GC]	Carbohydrate transport and metabolism;; Energy production and conversion	UDP-glucoronosyl and UDP-glucosyl transferase	7-deoxyloganetin glucosyltransferase OS=Gardenia jasminoides OX=114476 GN=UGT85A24 PE=1 SV=1	--	--	hypothetical protein Csa_017196 [Cucumis sativus]
CsaV3_7G006370	up	chr7	3948429	3948491	-	0.026702	0.178667	9	0.70122	0.52256	--	CsaV3_7G006360|	--	--	CsaV3_7G006370|+	--	up	--	--	Molecular Function: peroxidase activity (GO:0004601);; Cellular Component: extracellular region (GO:0005576);; Biological Process: response to oxidative stress (GO:0006979);; Molecular Function: heme binding (GO:0020037);; Biological Process: hydrogen peroxide catabolic process (GO:0042744);; Molecular Function: metal ion binding (GO:0046872);;	K00430|9.5e-187|csv:101217567|K00430 peroxidase [EC:1.11.1.7] | (RefSeq) peroxidase N1	Phenylpropanoid biosynthesis (ko00940)	--	--	Peroxidase	Peroxidase N1 OS=Nicotiana tabacum OX=4097 GN=poxN1 PE=1 SV=1	W	Extracellular structures	peroxidase N1 [Cucumis sativus]
CsaV3_7G006370	up	chr7	3951241	3951317	-	0.0030233	0.133944	12	0.41339	0.27944	--	--	--	--	CsaV3_7G006370|+	CsaV3_7G006370|	up
CsaV3_7G008610	up	chr7	5351221	5351360	-	0.00092297	0.165683	20	0.6438	0.47812	--	--	--	--	CsaV3_7G008610|+	CsaV3_7G008610|	down	[QV]	Secondary metabolites biosynthesis, transport and catabolism;; Defense mechanisms	Molecular Function: monooxygenase activity (GO:0004497);; Molecular Function: iron ion binding (GO:0005506);; Cellular Component: integral component of membrane (GO:0016021);; Molecular Function: oxidoreductase activity, acting on paired donors, with incorporation or reduction of molecular oxygen (GO:0016705);; Molecular Function: heme binding (GO:0020037);;	K09843|3.0e-284|csv:101219389|K09843 (+)-abscisic acid 8'-hydroxylase [EC:1.14.14.137] | (RefSeq) abscisic acid 8'-hydroxylase 4	Carotenoid biosynthesis (ko00906)	[QI]	Secondary metabolites biosynthesis, transport and catabolism;; Lipid transport and metabolism	Cytochrome P450	Abscisic acid 8'-hydroxylase 4 OS=Arabidopsis thaliana OX=3702 GN=CYP707A4 PE=2 SV=2	Q	Secondary metabolites biosynthesis, transport and catabolism	abscisic acid 8'-hydroxylase 4 [Cucumis sativus]
CsaV3_7G008610	up	chr7	5354984	5355099	-	0.0033334	0.152	14	0.76124	0.60924	--	CsaV3_7G008610|	--	--	CsaV3_7G008620|+	--	down
CsaV3_7G011310	up	chr7	6040502	6040556	-	0.001422	0.146194	12	0.31014	0.16394	--	--	--	--	CsaV3_7G011310|+	--	up	--	--	Cellular Component: anchored component of plasma membrane (GO:0046658);; Biological Process: root development (GO:0048364);; Biological Process: shoot system development (GO:0048367);;	--	--	--	--	Fasciclin domain	Fasciclin-like arabinogalactan protein 1 OS=Arabidopsis thaliana OX=3702 GN=FLA1 PE=1 SV=1	S	Function unknown	fasciclin-like arabinogalactan protein 1 [Cucumis sativus]
CsaV3_7G011310	up	chr7	6043688	6043743	-	1.27e-06	0.175333	12	0.94897	0.77364	--	--	--	--	CsaV3_7G011310|+	CsaV3_7G011310|	up
CsaV3_7G021220	up	chr7	9672311	9672429	-	2.89e-06	0.197	15	0.53916	0.34216	--	CsaV3_7G021210|	--	--	CsaV3_7G021220|-	CsaV3_7G021200|	up	--	--	Biological Process: DNA repair (GO:0006281);;	--	--	--	--	--	--	--	--	uncharacterized protein LOC101218535 isoform X2 [Cucumis sativus]
CsaV3_7G021220	up	chr7	9673851	9673933	-	0.0088257	0.120143	7	0.15252	0.032381	--	--	--	--	CsaV3_7G021220|-	--	up
CsaV3_7G021220	up	chr7	9676824	9676877	-	0.028529	0.162296	9	0.31215	0.14985	--	--	--	--	CsaV3_7G021220|-	--	up
CsaV3_7G022440	down	chr7	11369457	11369699	-	0.027466	-0.172333	10	0.36103	0.53337	--	--	--	--	CsaV3_7G022440|+	CsaV3_7G022440|	down	--	--	--	--	--	--	--	Protein of unknown function (DUF1677)	--	S	Function unknown	hypothetical protein Csa_016616 [Cucumis sativus]
CsaV3_7G027590	up	chr7	17160573	17160660	-	0.0069797	0.143217	20	0.78158	0.63837	--	CsaV3_7G027590|,CsaV3_7G027600|	--	--	CsaV3_7G027600|-	--	up	--	--	Biological Process: reproduction (GO:0000003);; Cellular Component: ubiquitin ligase complex (GO:0000151);; Biological Process: mitotic cell cycle (GO:0000278);; Biological Process: nuclear division (GO:0000280);; Cellular Component: male germ cell nucleus (GO:0001673);; Biological Process: developmental process involved in reproduction (GO:0003006);; Molecular Function: protein binding (GO:00055…	--	--	--	--	Leucine Rich repeats (2 copies)	F-box/LRR-repeat protein 17 OS=Arabidopsis thaliana OX=3702 GN=FBL17 PE=1 SV=1	S	Function unknown	F-box/LRR-repeat protein 17 [Cucumis sativus]
CsaV3_7G027830	down	chr7	17444847	17445041	-	2e-06	-0.143815	18	0.17111	0.31493	--	--	--	--	CsaV3_7G027840|+	CsaV3_7G027830|	down	[P]	Inorganic ion transport and metabolism	Cellular Component: integral component of plasma membrane (GO:0005887);; Molecular Function: secondary active sulfate transmembrane transporter activity (GO:0008271);; Cellular Component: chloroplast (GO:0009507);; Molecular Function: anion:anion antiporter activity (GO:0015301);;	K17471|0.0e+00|csv:101222260|K17471 sulfate transporter 3 | (RefSeq) sulfate transporter 3.1 isoform X1	--	[P]	Inorganic ion transport and metabolism	Sulfate permease family	Sulfate transporter 3.1 OS=Arabidopsis thaliana OX=3702 GN=SULTR3;1 PE=2 SV=1	P	Inorganic ion transport and metabolism	sulfate transporter 3.1 isoform X1 [Cucumis sativus]
CsaV3_7G030280	up	chr7	19160809	19161228	-	0.047042	0.125963	18	0.27785	0.15189	--	--	--	--	CsaV3_7G030280|-	CsaV3_7G030270|	down	--	--	Biological Process: regulation of systemic acquired resistance (GO:0010112);;	--	--	--	--	NPR1 interacting	--	--	--	hypothetical protein Csa_015768 [Cucumis sativus]
CsaV3_7G033890	down	chr7	21363298	21363385	-	0.0036044	-0.14187	18	0.36178	0.50365	--	--	--	--	CsaV3_7G033890|+	CsaV3_7G033880|	up	[M]	Cell wall/membrane/envelope biogenesis	Molecular Function: transmembrane receptor protein serine/threonine kinase activity (GO:0004675);; Molecular Function: ATP binding (GO:0005524);; Cellular Component: plasma membrane (GO:0005886);; Biological Process: protein phosphorylation (GO:0006468);; Cellular Component: integral component of membrane (GO:0016021);;	K13436|3.0e-70|bna:106394899|K13436 pto-interacting protein 1 [EC:2.7.11.1] | (RefSeq) PTI1-like tyrosine-protein kinase 3	Plant-pathogen interaction (ko04626)	--	--	Protein tyrosine and serine/threonine kinase	Protein STRUBBELIG-RECEPTOR FAMILY 7 OS=Arabidopsis thaliana OX=3702 GN=SRF7 PE=1 SV=1	T	Signal transduction mechanisms	protein STRUBBELIG-RECEPTOR FAMILY 7 isoform X1 [Cucumis sativus]
CsaV3_1G003380	down	chr1	2102862	2103093	-	0.0038339	-0.170333	16	0.4399	0.61023	--	--	--	--	CsaV3_1G003380|+	CsaV3_1G003370|	down	--	--	Molecular Function: DNA binding (GO:0003677);; Cellular Component: nucleus (GO:0005634);; Cellular Component: host cell nucleus (GO:0042025);; Molecular Function: metal ion binding (GO:0046872);;	K20641|5.7e-13|cvr:CHLNCDRAFT_59250|K20641 Rho GTPase-activating protein 20 | (RefSeq) hypothetical protein	--	--	--	SBP domain	Squamosa promoter-binding-like protein 6 OS=Arabidopsis thaliana OX=3702 GN=SPL6 PE=1 SV=2	S	Function unknown	squamosa promoter-binding-like protein 6 [Cucumis sativus]
CsaV3_1G005630	up	chr1	3642507	3642589	-	0.027466	0.186051	13	0.66903	0.48297	--	CsaV3_1G005630|	--	--	CsaV3_1G005640|+	CsaV3_1G005640|	up	--	--	Cellular Component: integral component of membrane (GO:0016021);; Biological Process: sphingoid catabolic process (GO:0046521);;	--	--	[S]	Function unknown	Protein of unknown function (DUF962)	--	S	Function unknown	uncharacterized endoplasmic reticulum membrane protein YGL010W [Cucumis sativus]
CsaV3_1G014510	down	chr1	10015324	10015405	-	0.034199	-0.184933	5	0.61047	0.7954	--	--	--	--	CsaV3_1G014510|-	--	up	[E]	Amino acid transport and metabolism	Molecular Function: prephenate dehydratase activity (GO:0004664);; Cellular Component: cytoplasm (GO:0005737);; Biological Process: L-phenylalanine biosynthetic process (GO:0009094);; Cellular Component: chloroplast (GO:0009507);; Cellular Component: chloroplast stroma (GO:0009570);; Molecular Function: arogenate dehydratase activity (GO:0047769);;	K05359|1.1e-235|csv:101222151|K05359 arogenate/prephenate dehydratase [EC:4.2.1.91 4.2.1.51] | (RefSeq) arogenate dehydratase/prephenate dehydratase 6, chloroplastic	Phenylalanine, tyrosine and tryptophan biosynthesis (ko00400);; Biosynthesis of amino acids (ko01230)	[E]	Amino acid transport and metabolism	Prephenate dehydratase	Arogenate dehydratase 3, chloroplastic OS=Arabidopsis thaliana OX=3702 GN=ADT3 PE=1 SV=1	E	Amino acid transport and metabolism	arogenate dehydratase/prephenate dehydratase 6, chloroplastic [Cucumis sativus]
CsaV3_1G014690	down	chr1	10238311	10238381	-	0.0023966	-0.190375	8	0.57975	0.77012	--	CsaV3_1G014680|	--	--	CsaV3_1G014690|-	--	up	[QV]	Secondary metabolites biosynthesis, transport and catabolism;; Defense mechanisms	Molecular Function: iron ion binding (GO:0005506);; Cellular Component: integral component of membrane (GO:0016021);; Molecular Function: oxidoreductase activity, acting on paired donors, with incorporation or reduction of molecular oxygen (GO:0016705);; Molecular Function: heme binding (GO:0020037);;	K20624|1.5e-292|csv:101207724|K20624 12-hydroxyjasmonoyl-L-amino acid 12-hydroxylase / fatty acid hydroxylase [EC:1.14.14.49] | (RefSeq) cytochrome P450 94C1	--	[QI]	Secondary metabolites biosynthesis, transport and catabolism;; Lipid transport and metabolism	Cytochrome P450	Cytochrome P450 94C1 OS=Arabidopsis thaliana OX=3702 GN=CYP94C1 PE=1 SV=1	--	--	hypothetical protein Csa_022682 [Cucumis sativus]
CsaV3_1G014690	down	chr1	10243482	10243542	-	0.021351	-0.112983	20	0.52612	0.6391	CsaV3_1G014690.1.cds1	--	CsaV3_1G014690.1.exon1	CsaV3_1G014690|	--	--	up
CsaV3_1G031230	down	chr1	18432954	18433050	-	0.0060674	-0.184111	15	0.5414	0.72551	--	CsaV3_1G031220|	--	--	CsaV3_1G031230|-	--	down	--	--	Cellular Component: nucleus (GO:0005634);; Molecular Function: zinc ion binding (GO:0008270);; Biological Process: regulation of flower development (GO:0009909);;	K12135|3.0e-37|thj:104802991|K12135 zinc finger protein CONSTANS | (RefSeq) zinc finger protein CONSTANS-LIKE 2-like	Circadian rhythm - plant (ko04712)	[K]	Transcription	CCT motif	Zinc finger protein CONSTANS-LIKE 5 OS=Arabidopsis thaliana OX=3702 GN=COL5 PE=2 SV=2	K	Transcription	hypothetical protein Csa_020132 [Cucumis sativus]
CsaV3_1G031230	down	chr1	18433799	18434052	-	0.0145	-0.184889	12	0.44922	0.63411	--	--	--	--	CsaV3_1G031230|-	--	down
CsaV3_1G033120	up	chr1	20156007	20156086	-	0.035273	0.172143	7	0.66152	0.48938	--	--	--	--	CsaV3_1G033120|+	--	up	--	--	--	--	--	--	--	Protein of unknown function (DUF1685)	--	S	Function unknown	uncharacterized protein LOC105434498 [Cucumis sativus]
CsaV3_1G033120	up	chr1	20174669	20174846	-	0.0057436	0.128333	17	0.84735	0.71902	--	CsaV3_1G033120|	--	--	CsaV3_1G033130|+	CsaV3_1G033130|	up
CsaV3_1G036900	up	chr1	22778707	22778834	-	0.0058788	0.215042	16	0.70733	0.49229	--	--	--	--	CsaV3_1G036900|-	--	up	[I]	Lipid transport and metabolism	Molecular Function: phospholipase activity (GO:0004620);; Biological Process: lipid metabolic process (GO:0006629);;	K16818|8.5e-70|han:110933352|K16818 phospholipase A1 [EC:3.1.1.32] | (RefSeq) phospholipase A(1) DAD1, chloroplastic-like	Glycerophospholipid metabolism (ko00564);; alpha-Linolenic acid metabolism (ko00592)	[I]	Lipid transport and metabolism	Lipase (class 3)	Phospholipase A1-Igamma2, chloroplastic OS=Arabidopsis thaliana OX=3702 GN=DALL3 PE=1 SV=2	I	Lipid transport and metabolism	phospholipase A1-Igamma1, chloroplastic [Cucumis sativus]
CsaV3_1G036900	up	chr1	22781523	22781657	-	0.014292	0.195212	11	0.33312	0.13791	--	--	--	--	CsaV3_1G036900|-	--	up
CsaV3_1G036900	up	chr1	22796678	22796734	-	0.006492	0.135485	11	0.92491	0.78942	--	--	--	--	CsaV3_1G036900|-	--	up
CsaV3_1G036900	down	chr1	22811080	22811131	-	0.0019648	-0.256667	9	0.65037	0.90704	--	CsaV3_1G036900|	--	--	CsaV3_1G036900|-	--	up
CsaV3_1G036900	down	chr1	22811134	22811267	-	0.00024337	-0.104707	33	0.83984	0.94455	--	CsaV3_1G036900|	--	--	CsaV3_1G036900|-	--	up
CsaV3_1G036900	down	chr1	22811272	22811440	-	4.26e-05	-0.172736	29	0.6696	0.84233	--	CsaV3_1G036900|	--	--	CsaV3_1G036900|-	--	up
CsaV3_1G038380	up	chr1	24140218	24140269	-	0.00016322	0.144256	13	0.79054	0.64628	--	--	--	--	CsaV3_1G038380|+	CsaV3_1G038380|	up	--	--	Molecular Function: calmodulin binding (GO:0005516);;	--	--	--	--	Calmodulin binding protein-like	Calmodulin-binding protein 60 B OS=Arabidopsis thaliana OX=3702 GN=CBP60B PE=2 SV=1	S	Function unknown	calmodulin-binding protein 60 B isoform X2 [Cucumis sativus]
CsaV3_1G038380	up	chr1	24140272	24140335	-	5.38e-08	0.271521	16	0.8316	0.56008	--	--	--	--	CsaV3_1G038380|+	CsaV3_1G038380|	up
CsaV3_1G038390	up	chr1	24154042	24154177	-	0.00016151	0.144641	13	0.45395	0.30931	--	--	--	--	CsaV3_1G038400|-	CsaV3_1G038390|	up	--	--	Molecular Function: calmodulin binding (GO:0005516);;	--	--	--	--	Calmodulin binding protein-like	Calmodulin-binding protein 60 F OS=Arabidopsis thaliana OX=3702 GN=CBP60F PE=2 SV=1	S	Function unknown	calmodulin-binding protein 60 C isoform X2 [Cucumis sativus]
CsaV3_1G038860	up	chr1	24466517	24466579	-	0.037212	0.107121	11	0.85579	0.74867	--	--	--	--	CsaV3_1G038860|-	--	down	[T]	Signal transduction mechanisms	Molecular Function: peroxidase activity (GO:0004601);; Molecular Function: calcium ion binding (GO:0005509);; Cellular Component: plasma membrane (GO:0005886);; Biological Process: response to heat (GO:0009408);; Biological Process: seed germination (GO:0009845);; Cellular Component: integral component of membrane (GO:0016021);; Molecular Function: NAD(P)H oxidase activity (GO:0016174);; Biologic…	K13447|0.0e+00|csv:101206498|K13447 respiratory burst oxidase [EC:1.6.3.- 1.11.1.-] | (RefSeq) respiratory burst oxidase homolog protein B	MAPK signaling pathway - plant (ko04016);; Plant-pathogen interaction (ko04626)	[PQ]	Inorganic ion transport and metabolism;; Secondary metabolites biosynthesis, transport and catabolism	Ferric reductase NAD binding domain	Respiratory burst oxidase homolog protein B OS=Solanum tuberosum OX=4113 GN=RBOHB PE=1 SV=1	--	--	respiratory burst oxidase homolog protein B [Cucumis sativus]
CsaV3_1G039550	up	chr1	24924816	24924872	-	5.99e-06	0.183636	11	0.77603	0.59239	--	--	--	--	CsaV3_1G039550|+	CsaV3_1G039540|	down	--	--	Molecular Function: transcription factor activity, sequence-specific DNA binding (GO:0003700);; Cellular Component: nucleus (GO:0005634);; Biological Process: cellular response to starvation (GO:0009267);; Biological Process: entrainment of circadian clock (GO:0009649);; Molecular Function: kinase binding (GO:0019900);; Molecular Function: identical protein binding (GO:0042802);; Molecular Functi…	--	--	--	--	Basic leucine-zipper C terminal	Light-inducible protein CPRF2 OS=Petroselinum crispum OX=4043 GN=CPRF2 PE=2 SV=2	K	Transcription	light-inducible protein CPRF2 [Cucumis sativus]
CsaV3_1G039550	up	chr1	24925142	24925478	-	0.0019668	0.117182	11	0.29709	0.17991	--	--	--	--	CsaV3_1G039550|+	CsaV3_1G039540|	down
CsaV3_1G040660	up	chr1	25874109	25874541	-	0.000894	0.225167	12	0.4925	0.26733	--	--	--	--	CsaV3_1G040660|+	CsaV3_1G040650|	up	--	--	--	--	--	[L]	Replication, recombination and repair	DDE superfamily endonuclease	Protein ALP1-like OS=Arabidopsis thaliana OX=3702 GN=At3g55350 PE=2 SV=1	L	Replication, recombination and repair	hypothetical protein Csa_007306 [Cucumis sativus]
CsaV3_1G040660	up	chr1	25876809	25876895	-	0.0059858	0.316583	8	0.68833	0.37175	--	--	--	--	CsaV3_1G040660|+	--	up
CsaV3_1G040660	down	chr1	25880389	25880498	-	0.00031101	-0.203633	20	0.32438	0.52802	--	--	--	--	CsaV3_1G040660|+	--	up
CsaV3_1G043180	down	chr1	28071754	28071808	-	0.0099016	-0.161667	8	0.28329	0.44496	--	--	--	--	CsaV3_1G043180|+	CsaV3_1G043170|	up	--	--	Molecular Function: protein binding (GO:0005515);; Cellular Component: cellular_component (GO:0005575);; Cellular Component: cell-cell junction (GO:0005911);; Biological Process: transport (GO:0006810);; Biological Process: cell communication (GO:0007154);; Biological Process: signal transduction (GO:0007165);; Biological Process: biological_process (GO:0008150);; Cellular Component: plasmodesma …	--	--	--	--	F-box-like	F-box protein At4g18380 OS=Arabidopsis thaliana OX=3702 GN=At4g18380 PE=2 SV=1	S	Function unknown	F-box protein At4g18380 [Cucumis sativus]
CsaV3_2G002020	up	chr2	706077	706156	-	0.024166	0.168571	7	0.79152	0.62295	--	--	--	--	CsaV3_2G002020|-	--	up	--	--	Molecular Function: DNA binding (GO:0003677);; Molecular Function: transcription factor activity, sequence-specific DNA binding (GO:0003700);; Cellular Component: nucleus (GO:0005634);;	K09286|1.6e-119|csv:101212945|K09286 EREBP-like factor | (RefSeq) ethylene-responsive transcription factor ERF039	--	--	--	AP2 domain	Dehydration-responsive element-binding protein 3 OS=Arabidopsis thaliana OX=3702 GN=DREB3 PE=2 SV=1	K	Transcription	ethylene-responsive transcription factor ERF039 [Cucumis sativus]
CsaV3_2G002450	up	chr2	1023371	1023513	-	0.034782	0.145854	16	0.51858	0.37273	--	CsaV3_2G002460|,CsaV3_2G002440|	--	--	CsaV3_2G002450|+	CsaV3_2G002450|	up	--	--	--	--	--	--	--	DVL family	--	S	Function unknown	hypothetical protein Csa_019376 [Cucumis sativus]
CsaV3_2G003020	down	chr2	1393018	1393094	-	5.76e-11	-0.226429	14	0.67212	0.89855	--	CsaV3_2G003010|	--	--	CsaV3_2G003020|+	CsaV3_2G003020|	up	--	--	Molecular Function: electron carrier activity (GO:0009055);; Cellular Component: anchored component of plasma membrane (GO:0046658);;	--	--	--	--	Plastocyanin-like domain	--	S	Function unknown	hypothetical protein Csa_019338 [Cucumis sativus]
CsaV3_2G003100	down	chr2	1460328	1460455	-	3.02e-05	-0.157204	18	0.25444	0.41165	--	--	--	CsaV3_2G003100|	--	--	down	--	--	Molecular Function: UDP-glucuronic acid transmembrane transporter activity (GO:0005461);; Molecular Function: UDP-N-acetylglucosamine transmembrane transporter activity (GO:0005462);; Molecular Function: UDP-N-acetylgalactosamine transmembrane transporter activity (GO:0005463);; Cellular Component: Golgi apparatus (GO:0005794);; Molecular Function: pyrimidine nucleotide-sugar transmembrane transp…	K15281|1.4e-190|csv:101217732|K15281 solute carrier family 35 | (RefSeq) UDP-N-acetylglucosamine transporter UGNT1 isoform X1	--	[GOU]	Carbohydrate transport and metabolism;; Posttranslational modification, protein turnover, chaperones;; Intracellular trafficking, secretion, and vesicular transport	Triose-phosphate Transporter family	UDP-N-acetylglucosamine transporter UGNT1 OS=Arabidopsis thaliana OX=3702 GN=UGNT1 PE=1 SV=1	--	--	UDP-N-acetylglucosamine transporter UGNT1 isoform X1 [Cucumis sativus]
CsaV3_2G003330	down	chr2	1595127	1595177	-	0.0017131	-0.197593	9	0.65867	0.85626	--	--	--	--	CsaV3_2G003330|+	CsaV3_2G003330|	down	--	--	--	--	--	--	--	--	--	--	--	hypothetical protein Csa_019232 [Cucumis sativus]
CsaV3_2G007180	down	chr2	3605068	3605132	-	5.57e-06	-0.188593	9	0.78444	0.97304	--	--	--	--	CsaV3_2G007180|+	CsaV3_2G007180|	up	--	--	Molecular Function: protein dimerization activity (GO:0046983);;	--	--	--	--	--	Transcription factor bHLH149 OS=Arabidopsis thaliana OX=3702 GN=BHLH149 PE=1 SV=1	K	Transcription	transcription factor bHLH149 [Cucumis sativus]
CsaV3_2G013230	down	chr2	10817479	10817560	-	2.07e-05	-0.196889	18	0.58009	0.77698	--	--	--	--	CsaV3_2G013230|+	--	up	--	--	Cellular Component: nucleus (GO:0005634);; Biological Process: regulation of transcription, DNA-templated (GO:0006355);; Biological Process: auxin-activated signaling pathway (GO:0009734);;	K14484|4.8e-105|csv:101204324|K14484 auxin-responsive protein IAA | (RefSeq) auxin-induced protein 22B	Plant hormone signal transduction (ko04075)	--	--	AUX/IAA family	Auxin-induced protein 22B OS=Vigna radiata var. radiata OX=3916 GN=AUX22B PE=2 SV=1	K	Transcription	auxin-induced protein 22B [Cucumis sativus]
CsaV3_2G013230	down	chr2	10826710	10826762	-	2.57e-06	-0.213278	12	0.40081	0.61408	--	--	CsaV3_2G013230.1.exon4	CsaV3_2G013230|	--	--	up
CsaV3_2G016980	up	chr2	14220667	14220751	-	0.0019758	0.102627	17	0.81792	0.71529	--	CsaV3_2G016980|	--	--	CsaV3_2G016990|-	--	up	--	--	--	--	--	--	--	Domain of unknown function (DUF4228)	--	S	Function unknown	hypothetical protein Csa_006772 [Cucumis sativus]
CsaV3_2G017330	down	chr2	14437164	14437259	-	6.47e-08	-0.154956	15	0.47613	0.63109	--	--	--	--	CsaV3_2G017330|+	--	up	[R]	General function prediction only	Biological Process: lipid catabolic process (GO:0016042);; Molecular Function: hydrolase activity (GO:0016787);;	K16815|3.9e-06|gsl:Gasu_03780|K16815 calcium-independent phospholipase A2-gamma | (RefSeq) hypothetical protein	--	[I]	Lipid transport and metabolism	Patatin-like phospholipase	Patatin-like protein 1 OS=Oryza sativa subsp. indica OX=39946 GN=PLP1 PE=3 SV=1	I	Lipid transport and metabolism	hypothetical protein Csa_006186 [Cucumis sativus]
CsaV3_2G017510	up	chr2	14582793	14582931	-	9.82e-08	0.117896	16	0.14406	0.026167	--	--	--	--	CsaV3_2G017510|-	--	down	--	--	Molecular Function: molecular_function (GO:0003674);; Molecular Function: nucleic acid binding (GO:0003676);; Molecular Function: RNA binding (GO:0003723);; Molecular Function: catalytic activity (GO:0003824);; Molecular Function: nuclease activity (GO:0004518);; Molecular Function: endonuclease activity (GO:0004519);; Molecular Function: binding (GO:0005488);; Cellular Component: cellular_compon…	K15336|1.2e-20|vvi:100259391|K15336 tRNA (cytosine38-C5)-methyltransferase [EC:2.1.1.204] | (RefSeq) pentatricopeptide repeat-containing protein At3g54980, mitochondrial	--	[R]	General function prediction only	PPR repeat family	Pentatricopeptide repeat-containing protein At3g54980, mitochondrial OS=Arabidopsis thaliana OX=3702 GN=At3g54980 PE=1 SV=1	S	Function unknown	pentatricopeptide repeat-containing protein At3g54980, mitochondrial isoform X1 [Cucumis sativus]
CsaV3_2G017960	down	chr2	14949765	14949876	-	0.042908	-0.128933	20	0.62392	0.75285	--	--	--	--	CsaV3_2G017960|+	--	up	--	--	Molecular Function: magnesium ion binding (GO:0000287);; Molecular Function: terpene synthase activity (GO:0010333);;	K12742|1.8e-230|cmo:103499736|K12742 isoprene synthase [EC:4.2.3.27] | (RefSeq) myrcene synthase, chloroplastic-like	Terpenoid backbone biosynthesis (ko00900)	--	--	Terpene synthase family, metal binding domain	Myrcene synthase, chloroplastic OS=Quercus ilex OX=58334 PE=1 SV=1	S	Function unknown	terpene synthase 10 [Cucumis sativus]
CsaV3_2G021070	up	chr2	16053398	16053496	-	0.00098459	0.161311	15	0.38131	0.22	--	CsaV3_2G021080|	--	CsaV3_2G021070|	--	--	up	[G]	Carbohydrate transport and metabolism	Molecular Function: pectate lyase activity (GO:0030570);; Biological Process: pectin catabolic process (GO:0045490);; Molecular Function: metal ion binding (GO:0046872);;	K01728|1.2e-267|csv:101207535|K01728 pectate lyase [EC:4.2.2.2] | (RefSeq) probable pectate lyase 12	Pentose and glucuronate interconversions (ko00040)	--	--	Pectate lyase	Probable pectate lyase 12 OS=Arabidopsis thaliana OX=3702 GN=At3g53190 PE=2 SV=2	G	Carbohydrate transport and metabolism	probable pectate lyase 12 [Cucumis sativus]
CsaV3_2G030380	up	chr2	19942950	19943163	-	0.0030806	0.120694	24	0.31117	0.19047	--	CsaV3_2G030370|	--	--	CsaV3_2G030390|+	CsaV3_2G030380|	up	--	--	Molecular Function: ATP transmembrane transporter activity (GO:0005347);; Biological Process: sulfate transport (GO:0008272);; Molecular Function: sulfate transmembrane transporter activity (GO:0015116);; Molecular Function: thiosulfate transmembrane transporter activity (GO:0015117);; Molecular Function: oxaloacetate transmembrane transporter activity (GO:0015131);; Molecular Function: malate tr…	K15104|5.8e-158|csv:101203264|K15104 solute carrier family 25 (mitochondrial oxoglutarate transporter), member 11 | (RefSeq) mitochondrial uncoupling protein 5	--	[C]	Energy production and conversion	Mitochondrial carrier protein	Mitochondrial uncoupling protein 5 OS=Arabidopsis thaliana OX=3702 GN=PUMP5 PE=2 SV=1	C	Energy production and conversion	hypothetical protein Csa_021990 [Cucumis sativus]
CsaV3_2G030390	up	chr2	19942950	19943163	-	0.0030806	0.120694	24	0.31117	0.19047	--	CsaV3_2G030370|	--	--	CsaV3_2G030390|+	CsaV3_2G030380|	up	--	--	Molecular Function: ATP transmembrane transporter activity (GO:0005347);; Biological Process: sulfate transport (GO:0008272);; Molecular Function: sulfate transmembrane transporter activity (GO:0015116);; Molecular Function: thiosulfate transmembrane transporter activity (GO:0015117);; Molecular Function: oxaloacetate transmembrane transporter activity (GO:0015131);; Molecular Function: malate tr…	K15104|4.9e-174|csv:101203029|K15104 solute carrier family 25 (mitochondrial oxoglutarate transporter), member 11 | (RefSeq) mitochondrial uncoupling protein 5	--	[C]	Energy production and conversion	Mitochondrial carrier protein	Mitochondrial uncoupling protein 5 OS=Arabidopsis thaliana OX=3702 GN=PUMP5 PE=2 SV=1	C	Energy production and conversion	mitochondrial uncoupling protein 5 [Cucumis sativus]
CsaV3_2G031720	down	chr2	20900400	20900482	-	0.00028957	-0.134909	11	0.13221	0.26712	--	--	--	--	CsaV3_2G031720|-	--	down	--	--	--	--	--	--	--	--	--	--	--	hypothetical protein Csa_022219 [Cucumis sativus]
CsaV3_2G033650	up	chr2	22329353	22329432	-	0.0052847	0.184444	9	0.85144	0.667	--	--	--	CsaV3_2G033650|	--	--	up	[E]	Amino acid transport and metabolism	Molecular Function: transaminase activity (GO:0008483);; Biological Process: biosynthetic process (GO:0009058);; Molecular Function: pyridoxal phosphate binding (GO:0030170);;	K10206|1.0e-262|csv:101216470|K10206 LL-diaminopimelate aminotransferase [EC:2.6.1.83] | (RefSeq) probable LL-diaminopimelate aminotransferase, chloroplastic	Lysine biosynthesis (ko00300);; Biosynthesis of amino acids (ko01230)	[E]	Amino acid transport and metabolism	Aminotransferase class I and II	Probable LL-diaminopimelate aminotransferase, chloroplastic OS=Oryza sativa subsp. japonica OX=39947 GN=AGD2 PE=2 SV=1	E	Amino acid transport and metabolism	probable LL-diaminopimelate aminotransferase, chloroplastic [Cucumis sativus]
CsaV3_2G034430	down	chr2	22825162	22825221	-	0.008274	-0.188778	9	0.38844	0.57722	--	CsaV3_2G034430|,CsaV3_2G034450|	--	--	CsaV3_2G034440|+	CsaV3_2G034440|	up	--	--	Cellular Component: integral component of membrane (GO:0016021);;	--	--	--	--	--	Signaling peptide TAXIMIN 2 OS=Arabidopsis thaliana OX=3702 GN=TAX2 PE=2 SV=1	--	--	PREDICTED: uncharacterized protein LOC103496015 [Cucumis melo]
CsaV3_2G034500	down	chr2	22853995	22854050	-	9.96e-09	-0.115381	14	0.86545	0.98083	--	--	--	--	CsaV3_2G034500|-	--	up	--	--	Molecular Function: electron carrier activity (GO:0009055);; Molecular Function: protein disulfide oxidoreductase activity (GO:0015035);;	K03676|5.7e-32|aip:107624401|K03676 glutaredoxin 3 | (RefSeq) glutaredoxin-C9	--	[O]	Posttranslational modification, protein turnover, chaperones	Glutaredoxin	Glutaredoxin-C9 OS=Arabidopsis thaliana OX=3702 GN=GRXC9 PE=1 SV=1	O	Posttranslational modification, protein turnover, chaperones	glutaredoxin-C9-like [Cucumis sativus]
CsaV3_2G034500	down	chr2	22856040	22856102	-	5.63e-06	-0.105035	19	0.67247	0.77751	--	--	--	--	CsaV3_2G034500|-	--	up
CsaV3_2G034500	down	chr2	22867750	22867995	-	0.0064879	-0.193119	14	0.38417	0.57729	--	--	--	--	CsaV3_2G034500|-	--	up
CsaV3_2G036170	down	chr2	24363701	24363765	-	0.011288	-0.114167	8	0.22621	0.34037	--	--	--	--	CsaV3_2G036170|+	--	up	[N]	Cell motility	Cellular Component: Golgi apparatus (GO:0005794);; Cellular Component: trans-Golgi network (GO:0005802);; Cellular Component: plasma membrane (GO:0005886);; Biological Process: plant-type primary cell wall biogenesis (GO:0009833);; Cellular Component: integral component of membrane (GO:0016021);; Molecular Function: cellulose synthase (UDP-forming) activity (GO:0016760);; Biological Process: cell…	K20924|0.0e+00|csv:101222423|K20924 cellulose synthase-like protein [EC:2.4.1.-] | (RefSeq) cellulose synthase-like protein D3	--	--	--	Cellulose synthase	Cellulose synthase-like protein D3 OS=Arabidopsis thaliana OX=3702 GN=CSLD3 PE=1 SV=1	G	Carbohydrate transport and metabolism	cellulose synthase-like protein D3 [Cucumis sativus]
CsaV3_3G001980	down	chr3	1531456	1531555	-	0.0099382	-0.167788	11	0.26364	0.43142	--	--	--	--	CsaV3_3G001980|+	--	down	[E]	Amino acid transport and metabolism	Cellular Component: integral component of membrane (GO:0016021);; Molecular Function: transmembrane transporter activity (GO:0022857);;	K14638|0.0e+00|csv:101216756|K14638 solute carrier family 15 (peptide/histidine transporter), member 3/4 | (RefSeq) protein NRT1/ PTR FAMILY 7.3 isoform X2	--	[E]	Amino acid transport and metabolism	POT family	Protein NRT1/ PTR FAMILY 7.3 OS=Arabidopsis thaliana OX=3702 GN=NPF7.3 PE=1 SV=2	E	Amino acid transport and metabolism	protein NRT1/ PTR FAMILY 7.3 isoform X2 [Cucumis sativus]
CsaV3_3G001980	up	chr3	1544266	1544374	-	0.0027044	0.295542	8	0.78708	0.49154	--	--	--	--	CsaV3_3G001980|+	CsaV3_3G001980|	down
CsaV3_3G001980	down	chr3	1551343	1551394	-	0.032155	-0.147571	14	0.47864	0.62621	--	CsaV3_3G001980|	--	--	CsaV3_3G001990|+	CsaV3_3G001990|	down
CsaV3_3G002470	up	chr3	1980601	1980782	-	1.6e-10	0.17872	31	0.64761	0.46889	--	--	--	--	CsaV3_3G002470|+	--	up	--	--	Molecular Function: DNA binding (GO:0003677);; Molecular Function: transcription factor activity, sequence-specific DNA binding (GO:0003700);; Cellular Component: nucleus (GO:0005634);;	K09286|3.1e-174|csv:101203172|K09286 EREBP-like factor | (RefSeq) ethylene-responsive transcription factor 6	--	--	--	AP2 domain	Ethylene-responsive transcription factor 6 OS=Arabidopsis thaliana OX=3702 GN=ERF6 PE=1 SV=2	K	Transcription	ethylene-responsive transcription factor 6 [Cucumis sativus]
CsaV3_3G002470	down	chr3	1989375	1989463	-	4.7e-05	-0.153571	14	0.068071	0.22164	--	--	--	--	CsaV3_3G002470|+	CsaV3_3G002470|	up
CsaV3_3G002470	up	chr3	1992784	1992834	-	0.0061155	0.401667	5	0.806	0.40433	--	CsaV3_3G002470|	--	--	CsaV3_3G002480|+	--	up
CsaV3_3G003000	up	chr3	2529724	2529868	-	0.0013147	0.27041	13	0.70574	0.43533	--	CsaV3_3G002990|	--	--	CsaV3_3G003000|-	--	down	--	--	Cellular Component: cellular_component (GO:0005575);; Cellular Component: cell (GO:0005623);; Cellular Component: plasma membrane (GO:0005886);; Biological Process: response to stress (GO:0006950);; Biological Process: response to osmotic stress (GO:0006970);; Biological Process: biological_process (GO:0008150);; Biological Process: response to abiotic stimulus (GO:0009628);; Biological Process: …	--	--	--	--	Glycine-rich domain-containing protein-like	Glycine-rich domain-containing protein 1 OS=Arabidopsis thaliana OX=3702 GN=GRDP1 PE=2 SV=1	S	Function unknown	glycine-rich domain-containing protein 1 [Cucumis sativus]
CsaV3_3G003000	down	chr3	2532206	2532288	-	3.03e-06	-0.120524	14	0.69843	0.81895	--	--	--	--	CsaV3_3G003000|-	--	down
CsaV3_3G005850	up	chr3	5063818	5063904	-	8.95e-08	0.147833	16	0.88385	0.73602	--	--	--	--	CsaV3_3G005850|+	CsaV3_3G005850|	up	--	--	Molecular Function: calcium ion binding (GO:0005509);;	K24345|1.1e-62|csv:101209230|K24345 calcium-binding protein KIC and related proteins | (RefSeq) calcium-binding protein KRP1	--	[ZD]	Cytoskeleton;; Cell cycle control, cell division, chromosome partitioning	EF-hand domain pair	Calcium-binding protein KRP1 OS=Arabidopsis thaliana OX=3702 GN=KRP1 PE=2 SV=1	--	--	calcium-binding protein KRP1 [Cucumis sativus]
CsaV3_3G014860	down	chr3	11022501	11022581	-	0.0038983	-0.146333	16	0.18958	0.33592	--	--	--	--	CsaV3_3G014860|+	CsaV3_3G014850|	up	--	--	Cellular Component: integral component of membrane (GO:0016021);; Biological Process: protein ubiquitination (GO:0016567);;	K19038|3.1e-26|cpap:110806591|K19038 E3 ubiquitin-protein ligase ATL41 [EC:2.3.2.27] | (RefSeq) E3 ubiquitin-protein ligase ATL41-like	--	[O]	Posttranslational modification, protein turnover, chaperones	Ring finger domain	RING-H2 finger protein ATL2 OS=Arabidopsis thaliana OX=3702 GN=ATL2 PE=2 SV=2	O	Posttranslational modification, protein turnover, chaperones	RING-H2 finger protein ATL2 [Cucumis sativus]
CsaV3_3G018200	up	chr3	13947627	13947697	-	0.028466	0.229444	9	0.39352	0.16407	--	CsaV3_3G018190|	--	--	CsaV3_3G018200|-	--	down	--	--	Molecular Function: transcription regulatory region sequence-specific DNA binding (GO:0000976);; Molecular Function: transcription factor activity, sequence-specific DNA binding (GO:0003700);; Molecular Function: transcription cofactor activity (GO:0003712);; Cellular Component: nucleus (GO:0005634);; Biological Process: regulation of transcription, DNA-templated (GO:0006355);; Molecular Function…	K09422|5.6e-129|csv:101204047|K09422 transcription factor MYB, plant | (RefSeq) transcription factor MYB73	--	[K]	Transcription	Myb-like DNA-binding domain	Transcription factor MYB73 OS=Arabidopsis thaliana OX=3702 GN=MYB73 PE=1 SV=1	--	--	transcription factor MYB73 [Cucumis sativus]
CsaV3_3G018420	down	chr3	14129645	14129715	-	0.0094608	-0.2169	10	0.42373	0.64063	--	--	--	--	CsaV3_3G018410|+	CsaV3_3G018420|,CsaV3_3G018410|	up	--	--	Cellular Component: exocyst (GO:0000145);; Biological Process: exocytosis (GO:0006887);; Biological Process: Golgi to plasma membrane transport (GO:0006893);; Biological Process: vesicle docking involved in exocytosis (GO:0006904);; Cellular Component: membrane (GO:0016020);;	K19985|0.0e+00|csv:101219559|K19985 exocyst complex component 6 | (RefSeq) exocyst complex component SEC15A	--	[U]	Intracellular trafficking, secretion, and vesicular transport	Exocyst complex subunit Sec15-like	Exocyst complex component SEC15A OS=Arabidopsis thaliana OX=3702 GN=SEC15A PE=3 SV=2	U	Intracellular trafficking, secretion, and vesicular transport	exocyst complex component SEC15A [Cucumis sativus]
CsaV3_3G018600	up	chr3	14325588	14325897	-	0.047042	0.152778	6	0.24256	0.089778	--	--	--	--	CsaV3_3G018610|-	CsaV3_3G018600|	up	--	--	Molecular Function: DNA binding (GO:0003677);; Molecular Function: transcription factor activity, sequence-specific DNA binding (GO:0003700);; Cellular Component: nucleus (GO:0005634);;	K09286|1.5e-22|cic:CICLE_v10021059mg|K09286 EREBP-like factor | (RefSeq) hypothetical protein	--	--	--	AP2 domain	Ethylene-responsive transcription factor ERF109 OS=Arabidopsis thaliana OX=3702 GN=ERF109 PE=1 SV=1	K	Transcription	ethylene-responsive transcription factor ERF109 [Cucumis sativus]
CsaV3_3G019820	up	chr3	15619262	15619377	-	2.61e-05	0.11112	25	0.84644	0.73532	--	CsaV3_3G019820|	--	--	CsaV3_3G019820|-	--	up	--	--	Molecular Function: protein binding (GO:0005515);;	--	--	--	--	IQ calmodulin-binding motif	Protein IQ-DOMAIN 14 OS=Arabidopsis thaliana OX=3702 GN=IQD14 PE=1 SV=1	S	Function unknown	protein IQ-DOMAIN 1 isoform X2 [Cucumis sativus]
CsaV3_3G021120	up	chr3	17687356	17687443	-	0.019984	0.178	9	0.41578	0.23778	--	--	--	--	CsaV3_3G021120|-	CsaV3_3G021110|	up	[L]	Replication, recombination and repair	Molecular Function: ubiquitin-protein transferase activity (GO:0004842);;	K10260|2.1e-18|ota:OT_ostta09g00430|K10260 F-box and WD-40 domain protein 7 | (RefSeq) WD40/YVTN repeat-like-containing domain	Ubiquitin mediated proteolysis (ko04120)	--	--	U-box domain	U-box domain-containing protein 21 OS=Arabidopsis thaliana OX=3702 GN=PUB21 PE=2 SV=1	H	Coenzyme transport and metabolism	U-box domain-containing protein 21 [Cucumis sativus]
CsaV3_3G021120	down	chr3	17691782	17692053	-	6.15e-05	-0.131444	21	0.13597	0.26741	--	--	--	--	CsaV3_3G021120|-	--	up
CsaV3_3G026680	up	chr3	22879768	22879921	-	4.26e-06	0.217178	15	0.77862	0.56144	--	--	--	--	CsaV3_3G026680|+	--	up	[V]	Defense mechanisms	Molecular Function: ATP binding (GO:0005524);; Cellular Component: plasma membrane (GO:0005886);; Cellular Component: integral component of membrane (GO:0016021);; Molecular Function: ATPase activity (GO:0016887);; Molecular Function: ATPase activity, coupled to transmembrane movement of substances (GO:0042626);; Biological Process: transmembrane transport (GO:0055085);;	K08712|1.5e-142|gsl:Gasu_29800|K08712 ATP-binding cassette, subfamily G (WHITE), member 2, SNQ2 | (RefSeq) ABC transporter, ATP-binding protein	ABC transporters (ko02010)	[Q]	Secondary metabolites biosynthesis, transport and catabolism	ABC-2 type transporter	Pleiotropic drug resistance protein 1 OS=Nicotiana tabacum OX=4097 GN=PDR1 PE=2 SV=1	Q	Secondary metabolites biosynthesis, transport and catabolism	pleiotropic drug resistance protein 1 [Cucumis sativus]
CsaV3_3G026960	down	chr3	23351284	23351404	-	0.0029485	-0.141286	7	0.19948	0.34076	--	--	--	--	CsaV3_3G026960|+	--	down	--	--	--	--	--	--	--	--	--	--	--	hypothetical protein Csa_017653 [Cucumis sativus]
CsaV3_3G028570	down	chr3	25017314	25017400	-	0.0080478	-0.134567	10	0.31757	0.45213	--	--	--	--	CsaV3_3G028570|+	--	up	[P]	Inorganic ion transport and metabolism	Molecular Function: N,N-dimethylaniline monooxygenase activity (GO:0004499);; Molecular Function: flavin adenine dinucleotide binding (GO:0050660);; Molecular Function: NADP binding (GO:0050661);;	K11816|2.2e-246|csv:101203521|K11816 indole-3-pyruvate monooxygenase [EC:1.14.13.168] | (RefSeq) probable indole-3-pyruvate monooxygenase YUCCA8	Tryptophan metabolism (ko00380)	[Q]	Secondary metabolites biosynthesis, transport and catabolism	Flavin-binding monooxygenase-like	Probable indole-3-pyruvate monooxygenase YUCCA8 OS=Arabidopsis thaliana OX=3702 GN=YUC8 PE=2 SV=1	Q	Secondary metabolites biosynthesis, transport and catabolism	probable indole-3-pyruvate monooxygenase YUCCA8 [Cucumis sativus]
CsaV3_3G028570	down	chr3	25021754	25021860	-	0.00056979	-0.121417	12	0.11428	0.23569	--	--	--	--	CsaV3_3G028570|+	--	up
CsaV3_3G028570	down	chr3	25052927	25052983	-	0.035322	-0.161286	7	0.29119	0.45248	--	--	--	--	CsaV3_3G028570|+	CsaV3_3G028570|	up
CsaV3_3G030830	up	chr3	26611033	26611083	-	2.72e-05	0.270111	9	0.56226	0.29215	--	--	--	--	CsaV3_3G030830|+	CsaV3_3G030830|	up	--	--	Cellular Component: nucleus (GO:0005634);; Biological Process: response to wounding (GO:0009611);; Biological Process: regulation of defense response (GO:0031347);; Biological Process: regulation of jasmonic acid mediated signaling pathway (GO:2000022);;	K13464|1.9e-110|csv:101204473|K13464 jasmonate ZIM domain-containing protein | (RefSeq) protein TIFY 10a	Plant hormone signal transduction (ko04075)	--	--	tify domain	Protein TIFY 10a OS=Oryza sativa subsp. japonica OX=39947 GN=TIFY10A PE=1 SV=1	S	Function unknown	protein TIFY 10a [Cucumis sativus]
CsaV3_3G031670	up	chr3	27416614	27416691	-	0.001858	0.132258	22	0.91676	0.7845	--	CsaV3_3G031670|	--	--	CsaV3_3G031670|-	CsaV3_3G031660|	up	--	--	Molecular Function: hydrolase activity, acting on ester bonds (GO:0016788);;	K01206|1.6e-78|crb:17894383|K01206 alpha-L-fucosidase [EC:3.2.1.51] | (RefSeq) alpha-L-fucosidase 3	Other glycan degradation (ko00511)	--	--	GDSL-like Lipase/Acylhydrolase	GDSL esterase/lipase At1g09390 OS=Arabidopsis thaliana OX=3702 GN=At1g09390 PE=2 SV=1	S	Function unknown	GDSL esterase/lipase At1g09390 [Cucumis sativus]
CsaV3_3G032400	down	chr3	27943842	27944012	-	0.0027694	-0.141944	18	0.55409	0.69604	--	--	--	--	CsaV3_3G032400|-	CsaV3_3G032390|	up	--	--	Cellular Component: cytoplasm (GO:0005737);; Biological Process: fucose metabolic process (GO:0006004);; Cellular Component: integral component of membrane (GO:0016021);; Molecular Function: transferase activity, transferring glycosyl groups (GO:0016757);;	K23280|6.1e-66|smo:SELMODRAFT_148957|K23280 rhamnogalacturonan I rhamnosyltransferase [EC:2.4.1.351] | (RefSeq) hypothetical protein	--	--	--	GDP-fucose protein O-fucosyltransferase	O-fucosyltransferase 20 OS=Arabidopsis thaliana OX=3702 GN=OFUT20 PE=1 SV=1	G	Carbohydrate transport and metabolism	O-fucosyltransferase 20 [Cucumis sativus]
CsaV3_3G032400	up	chr3	27944259	27944372	-	8.9e-05	0.233578	15	0.45322	0.21964	--	--	--	--	CsaV3_3G032400|-	CsaV3_3G032390|	up
CsaV3_3G032830	up	chr3	28384427	28384531	-	0.0093907	0.110545	11	0.85033	0.73979	--	CsaV3_3G032820|	--	--	CsaV3_3G032830|-	--	up	[M]	Cell wall/membrane/envelope biogenesis	Molecular Function: oxidoreductase activity (GO:0016491);; Molecular Function: oxidoreductase activity, acting on the CH-OH group of donors, NAD or NADP as acceptor (GO:0016616);;	K09753|8.3e-185|csv:101218838|K09753 cinnamoyl-CoA reductase [EC:1.2.1.44] | (RefSeq) cinnamoyl-CoA reductase 2	Phenylpropanoid biosynthesis (ko00940)	[V]	Defense mechanisms	NAD dependent epimerase/dehydratase family	Cinnamoyl-CoA reductase 2 OS=Arabidopsis thaliana OX=3702 GN=CCR2 PE=1 SV=1	V	Defense mechanisms	cinnamoyl-CoA reductase 2-like [Cucumis sativus]
CsaV3_3G037710	up	chr3	31088798	31088926	-	0.0003528	0.161533	20	0.74098	0.57945	--	--	--	--	CsaV3_3G037710|+	CsaV3_3G037710|	down	--	--	Cellular Component: nucleus (GO:0005634);; Biological Process: negative regulation of transcription, DNA-templated (GO:0045892);;	--	--	--	--	Transcriptional repressor, ovate	Transcription repressor OFP15 OS=Arabidopsis thaliana OX=3702 GN=OFP15 PE=1 SV=1	S	Function unknown	transcription repressor OFP15 [Cucumis sativus]
CsaV3_3G039440	down	chr3	32441781	32441889	-	0.0037426	-0.1218	20	0.48943	0.61123	--	CsaV3_3G039430|	--	--	CsaV3_3G039440|+	--	down	[T]	Signal transduction mechanisms	Molecular Function: ATP binding (GO:0005524);; Cellular Component: plasma membrane (GO:0005886);; Cellular Component: integral component of membrane (GO:0016021);; Molecular Function: ATPase activity (GO:0016887);; Molecular Function: ATPase activity, coupled to transmembrane movement of substances (GO:0042626);; Biological Process: transmembrane transport (GO:0055085);;	K08712|8.0e-139|gsl:Gasu_29800|K08712 ATP-binding cassette, subfamily G (WHITE), member 2, SNQ2 | (RefSeq) ABC transporter, ATP-binding protein	ABC transporters (ko02010)	[Q]	Secondary metabolites biosynthesis, transport and catabolism	ABC-2 type transporter	Pleiotropic drug resistance protein 3 OS=Nicotiana tabacum OX=4097 GN=PDR3 PE=2 SV=1	Q	Secondary metabolites biosynthesis, transport and catabolism	pleiotropic drug resistance protein 3 [Cucumis sativus]
CsaV3_3G039500	up	chr3	32480436	32480511	-	0.018048	0.17325	8	0.56258	0.38933	--	--	--	--	CsaV3_3G039500|+	--	up	--	--	Biological Process: phototropism (GO:0009638);;	--	--	--	--	--	Protein PHYTOCHROME KINASE SUBSTRATE 4 OS=Arabidopsis thaliana OX=3702 GN=PKS4 PE=1 SV=1	S	Function unknown	hypothetical protein Csa_001471 [Cucumis sativus]
CsaV3_3G041460	up	chr3	33791664	33791737	-	0.0052855	0.12163	9	0.44993	0.3283	--	--	--	--	CsaV3_3G041460|+	--	down	[G]	Carbohydrate transport and metabolism	Molecular Function: channel activity (GO:0015267);; Cellular Component: integral component of membrane (GO:0016021);;	K09874|6.4e-157|csv:101205692|K09874 aquaporin NIP | (RefSeq) aquaporin NIP2-1-like	--	[G]	Carbohydrate transport and metabolism	Major intrinsic protein	Aquaporin NIP2-1 OS=Zea mays OX=4577 GN=NIP2-1 PE=2 SV=2	G	Carbohydrate transport and metabolism	aquaporin NIP2-1-like [Cucumis sativus]
CsaV3_3G041820	up	chr3	34079119	34079405	-	0.0061972	0.221928	23	0.50129	0.27936	--	CsaV3_3G041810|	--	--	CsaV3_3G041820|+	--	down	[MDT]	Cell wall/membrane/envelope biogenesis;; Cell cycle control, cell division, chromosome partitioning;; Signal transduction mechanisms	Molecular Function: ATP binding (GO:0005524);; Cellular Component: integral component of membrane (GO:0016021);;	K08900|1.0e-160|han:110879244|K08900 mitochondrial chaperone BCS1 | (RefSeq) AAA-ATPase ASD, mitochondrial-like	--	[O]	Posttranslational modification, protein turnover, chaperones	Domain associated at C-terminal with AAA	AAA-ATPase ASD, mitochondrial OS=Arabidopsis thaliana OX=3702 GN=AATP1 PE=1 SV=1	O	Posttranslational modification, protein turnover, chaperones	AAA-ATPase At3g28580 [Cucumis sativus]
CsaV3_3G041820	up	chr3	34083950	34084002	-	0.033476	0.133394	11	0.28691	0.15352	--	--	--	--	CsaV3_3G041820|+	CsaV3_3G041820|	down
CsaV3_3G043070	up	chr3	34956378	34956642	-	0.0001224	0.191885	29	0.46146	0.26957	--	--	--	--	CsaV3_3G043070|+	CsaV3_3G043060|	up	[G]	Carbohydrate transport and metabolism	Molecular Function: beta-glucosidase activity (GO:0008422);; Biological Process: glucan catabolic process (GO:0009251);;	K05349|0.0e+00|csv:101221143|K05349 beta-glucosidase [EC:3.2.1.21] | (RefSeq) uncharacterized protein LOC101221143	Cyanoamino acid metabolism (ko00460);; Starch and sucrose metabolism (ko00500);; Phenylpropanoid biosynthesis (ko00940)	--	--	Glycosyl hydrolase family 3 N terminal domain	Beta-xylosidase/alpha-L-arabinofuranosidase 2 OS=Medicago sativa subsp. varia OX=36902 GN=Xyl2 PE=2 SV=1	G	Carbohydrate transport and metabolism	uncharacterized protein LOC101221143 [Cucumis sativus]
CsaV3_3G043070	up	chr3	34958566	34958619	-	0.0012439	0.189788	11	0.76067	0.57088	--	--	--	--	CsaV3_3G043070|+	--	up
CsaV3_3G044660	up	chr3	36556434	36556493	-	0.027466	0.136667	8	0.88213	0.74546	--	CsaV3_3G044660|	--	--	CsaV3_3G044670|+	CsaV3_3G044670|	down	[QV]	Secondary metabolites biosynthesis, transport and catabolism;; Defense mechanisms	Molecular Function: iron ion binding (GO:0005506);; Cellular Component: membrane (GO:0016020);; Cellular Component: integral component of membrane (GO:0016021);; Molecular Function: oxidoreductase activity, acting on paired donors, with incorporation or reduction of molecular oxygen, NAD(P)H as one donor, and incorporation of one atom of oxygen (GO:0016709);; Molecular Function: heme binding (GO:…	K23136|2.4e-141|lja:Lj1g3v1615300.1|K23136 fraxetin 5-hydroxylase [EC:1.14.14.164] | (RefSeq) Lj1g3v1615300.1; -	--	[Q]	Secondary metabolites biosynthesis, transport and catabolism	Cytochrome P450	Cytochrome P450 82A3 OS=Glycine max OX=3847 GN=CYP82A3 PE=2 SV=1	Q	Secondary metabolites biosynthesis, transport and catabolism	cytochrome P450 82A3 [Cucumis sativus]
CsaV3_3G044850	up	chr3	36664410	36664526	-	0.0030142	0.13349	17	0.84541	0.71192	--	--	--	CsaV3_3G044850|	--	CsaV3_3G044840|	down	--	--	Molecular Function: calcium ion binding (GO:0005509);;	K13448|5.7e-93|csv:101212011|K13448 calcium-binding protein CML | (RefSeq) probable calcium-binding protein CML41	Plant-pathogen interaction (ko04626)	[T]	Signal transduction mechanisms	EF hand	Probable calcium-binding protein CML41 OS=Arabidopsis thaliana OX=3702 GN=CML41 PE=2 SV=2	T	Signal transduction mechanisms	hypothetical protein Csa_001024 [Cucumis sativus]
CsaV3_3G045440	up	chr3	37103746	37103814	-	0.041947	0.17559	13	0.72059	0.545	--	--	--	--	CsaV3_3G045440|-	CsaV3_3G045430|	down	--	--	Molecular Function: transcriptional activator activity, RNA polymerase II transcription regulatory region sequence-specific binding (GO:0001228);; Cellular Component: nucleus (GO:0005634);; Molecular Function: protein dimerization activity (GO:0046983);;	K05765|3.1e-14|gra:105781290|K05765 cofilin | (RefSeq) uncharacterized LOC105781290	--	--	--	--	Transcription factor bHLH110 OS=Arabidopsis thaliana OX=3702 GN=BHLH110 PE=2 SV=2	K	Transcription	transcription factor bHLH110 isoform X3 [Cucumis sativus]
CsaV3_3G045760	down	chr3	37431431	37431602	-	0.0443	-0.112786	14	0.19193	0.30471	--	CsaV3_3G045760|	--	CsaV3_3G045750|	--	--	up	[G]	Carbohydrate transport and metabolism	Molecular Function: cellulase activity (GO:0008810);; Cellular Component: integral component of membrane (GO:0016021);; Biological Process: cellulose catabolic process (GO:0030245);;	K01179|2.0e-212|jre:108982352|K01179 endoglucanase [EC:3.2.1.4] | (RefSeq) endoglucanase 2-like	Starch and sucrose metabolism (ko00500)	--	--	Glycosyl hydrolase family 9	Endoglucanase 10 OS=Arabidopsis thaliana OX=3702 GN=At1g75680 PE=2 SV=2	G	Carbohydrate transport and metabolism	endoglucanase 10 [Cucumis sativus]
CsaV3_3G046840	down	chr3	38240048	38240400	-	0.028529	-0.157133	10	0.2763	0.43343	--	--	--	--	CsaV3_3G046840|+	CsaV3_3G046830|	up	--	--	--	--	--	--	--	--	DDT domain-containing protein DDR4 OS=Arabidopsis thaliana OX=3702 GN=DDR4 PE=1 SV=1	--	--	DDT domain-containing protein DDR4 [Cucumis sativus]
CsaV3_3G049430	down	chr3	40287739	40287880	-	2.88e-05	-0.205028	12	0.08925	0.29428	--	--	--	--	CsaV3_3G049430|+	--	down	[E]	Amino acid transport and metabolism	Cellular Component: integral component of membrane (GO:0016021);; Molecular Function: transmembrane transporter activity (GO:0022857);;	K14638|0.0e+00|csv:101222587|K14638 solute carrier family 15 (peptide/histidine transporter), member 3/4 | (RefSeq) protein NRT1/ PTR FAMILY 7.3	--	[E]	Amino acid transport and metabolism	POT family	Protein NRT1/ PTR FAMILY 7.3 OS=Arabidopsis thaliana OX=3702 GN=NPF7.3 PE=1 SV=2	E	Amino acid transport and metabolism	protein NRT1/ PTR FAMILY 7.3 [Cucumis sativus]
CsaV3_4G000140	down	chr4	110650	110736	-	0.0038908	-0.176	12	0.23122	0.40722	--	--	--	--	CsaV3_4G000140|-	--	up	--	--	Biological Process: regulation of cyclin-dependent protein serine/threonine kinase activity (GO:0000079);; Cellular Component: cyclin-dependent protein kinase holoenzyme complex (GO:0000307);; Cellular Component: nucleus (GO:0005634);; Cellular Component: cytoplasm (GO:0005737);; Molecular Function: cyclin-dependent protein serine/threonine kinase regulator activity (GO:0016538);; Cellular Compon…	K18810|2.4e-134|csv:101219121|K18810 cyclin D1/2/4, plant | (RefSeq) cyclin-D4-1	--	[D]	Cell cycle control, cell division, chromosome partitioning	Cyclin, N-terminal domain	Cyclin-D1-1 OS=Arabidopsis thaliana OX=3702 GN=CYCD1-1 PE=1 SV=3	D	Cell cycle control, cell division, chromosome partitioning	hypothetical protein Csa_015003 [Cucumis sativus]
CsaV3_4G000140	down	chr4	116111	116217	-	6.98e-06	-0.1962	20	0.525	0.7212	--	--	--	CsaV3_4G000140|	--	--	up
CsaV3_4G002400	up	chr4	1443238	1443328	-	2.83e-05	0.129333	14	0.78083	0.6515	--	--	--	--	CsaV3_4G002400|-	--	down	--	--	--	--	--	--	--	--	--	--	--	hypothetical protein Csa_023802, partial [Cucumis sativus]
CsaV3_4G007620	up	chr4	5230762	5230874	-	0.00069192	0.161476	14	0.28529	0.12381	--	--	--	--	CsaV3_4G007620|+	--	up	[M]	Cell wall/membrane/envelope biogenesis	Molecular Function: protein serine/threonine kinase activity (GO:0004674);; Molecular Function: ATP binding (GO:0005524);;	K13416|4.7e-65|cam:101506449|K13416 brassinosteroid insensitive 1-associated receptor kinase 1 [EC:2.7.10.1 2.7.11.1] | (RefSeq) BRASSINOSTEROID INSENSITIVE 1-associated receptor kinase 1	MAPK signaling pathway - plant (ko04016);; Plant hormone signal transduction (ko04075);; Plant-pathogen interaction (ko04626)	[T]	Signal transduction mechanisms	Protein kinase domain	Cold-responsive protein kinase 1 OS=Arabidopsis thaliana OX=3702 GN=CRPK1 PE=1 SV=1	T	Signal transduction mechanisms	cold-responsive protein kinase 1 [Cucumis sativus]
CsaV3_4G007620	down	chr4	5232073	5232191	-	0.040499	-0.1605	8	0.47846	0.63896	--	--	--	--	CsaV3_4G007620|+	--	up
[truncated: 113 more rows]

## Sheet: Table S3
Table S3 DMRs and DEGs involved in critical pathways between FNLs and NFNLs.
DMRs and DEGs involved in critical pathways
GeneID	FNL-1-FPKM	FNL-2-FPKM	FNL-3-FPKM	NFNL-1-FPKM	NFNL-2-FPKM	NFNL-3-FPKM	regulated	gene description	gene name	EC	methyl-diff	passway
CsaV3_2G013230	32.0966	12.3414	69.5014	17.9153	18.8999	12.358	up	auxin-responsive protein IAA	IAA		down	auxin biosynthesis and signal transduction
[truncated: 44 more rows]

## Sheet: Table S4
Table S4 Transcription factors prediction of CsGolS1, CsRS and CsSTS.
[truncated: 42 more rows]

[truncated: 3 more sheets: Table S5, Table S6, Table S7]
